# Supplementary material for: Characterization of UV sex chromosomes and synteny-guided phylogenomic resolution of subgenomes in Bryopsida mosses
Source: Research Square preprint supplement (doi:10.21203/rs.3.rs-2731574/v1), 2023-05-02
Supplement: Supplementary file 1 [file 61febd4d477851e5906f0226.xlsx]

## Sheet: Table S3
Table S3 - Summary of the chromosome-level Bryopsida genomes analyzed in this study.
Bryum argenteum
chr_ID	length (bp)	#Genes	Gene density (#genes per Mb)	GC content(%)
Chr1/U	44091100	539	12.225	43.75
Chr2	34643267	3001	86.626	41.56
Chr3	30564085	2541	83.137	41.57
Chr4	28701920	2530	88.147	41.78
Chr5	22196951	1809	81.498	41.62
Chr6	20150827	1518	75.332	41.76
Chr7	18713175	1342	71.714	41.45
Chr8	18548292	1366	73.646	40.72
Chr9	16981786	1240	73.019	41.24
Chr10	16786822	1258	74.94	41.16
Chr11	6985077	554	79.312	41
Pohlia nutans
chr_ID	length (bp)	#Genes	Gene density(#genes per Mb)	GC content(%)
chr1	52153166	3092	59.287	38.77
chr2	50597650	3075	60.774	39.16
chr3	40813238	2459	60.25	39.32
chr4	44129110	2590	58.691	38.65
chr5	46768478	2671	57.111	38.44
chr6	42291491	2568	60.721	38.79
chr7	24915986	1356	54.423	39.28
chr8	24336973	1230	50.54	38.4
chr9	23746999	1263	53.186	38.67
chr10	23408574	1239	52.929	38.95
chr11	30809753	1776	57.644	39.2
chr12	32725420	1789	54.667	38.71
chr13	23862562	1369	57.37	38.49
chr14	22983581	1319	57.389	38.95
chr15	26645960	1484	55.693	39.14
chr16	27731430	1550	55.893	38.92
chr17	30709574	1688	54.967	38.89
chr18	29960589	1653	55.172	39.39
chr19	24655094	1350	54.755	39.13
chr20	15190521	650	42.79	38.75
chr21	12354672	703	56.902	37.9
chr22/V	19511378	323	16.554	40.97
chr23/U	16695974	192	11.5	44.27
Hypnum curvifolium
Original_ID	chr_ID	length (bp)	#Genes	Gene density(#genes per Mb)	GC content(%)
HiC_scaffold_1	chr1	32850479	3891	118.446	36.77
HiC_scaffold_2	chr2	39238594	4890	124.622	36.7
HiC_scaffold_3	chr3	33981100	3999	117.683	36.42
HiC_scaffold_4	chr4	20658656	2437	117.965	36.56
HiC_scaffold_5	chr5	17508044	1923	109.835	35.99
HiC_scaffold_6	chr6	22682911	2584	113.918	36.18
HiC_scaffold_7	chr7	18018493	2126	117.99	36.73
HiC_scaffold_8	chr8	17502139	1931	110.329	36.14
HiC_scaffold_9	chr9	17496171	1916	109.51	36.19
HiC_scaffold_10	chr9	16914777	1931	114.161	36.3
HiC_scaffold_11	chr11/V	15337761	433	28.231	40.06
Entodon seductrix
Original_ID	chr_ID	length (bp)	#Genes	Gene density(#genes per Mb)	GC content(%)
HiC_scaffold_3	chr1	30002010	2243	74.762	34.1
HiC_scaffold_4	chr2	23364357	1622	69.422	34.01
HiC_scaffold_5	chr3	30339520	2193	72.282	34.34
HiC_scaffold_6	chr4	24888020	1905	76.543	34.7
HiC_scaffold_7	chr5	45313913	3467	76.511	34.42
HiC_scaffold_8	chr6	22376749	1603	71.637	33.79
HiC_scaffold_9	chr7	24276030	1752	72.17	34.07
HiC_scaffold_10	chr8	52349409	4330	82.713	34.42
HiC_scaffold_11	chr9	46020323	3622	78.704	34.08
HiC_scaffold_12	chr10	24432012	1722	70.481	34.14
HiC_scaffold_2	chr11/V	16387039	104	6.346	32.83
Syntrichia caninervis
Original_ID	chr_ID	length (bp)	#Genes	Gene density(#genes per Mb)	GC content(%)
Sc_s1	chr1	14942484	1016	67.994	38.63
Sc_s2	chr2	16785435	1099	65.473	38.35
Sc_s3	chr3	17473668	1102	63.066	38.57
Sc_s4	chr4	18468480	1191	64.488	38.01
Sc_s5	chr5	18825985	1098	58.324	38.46
Sc_s6	chr6	19449710	1234	63.446	38.61
Sc_s7	chr7	20458921	1342	65.595	38.86
Sc_s8	chr8	21898694	1245	56.853	38.54
Sc_s9	chr9	23225248	1568	67.513	38.6
Sc_s10	chr10	25677578	1633	63.596	38.48
Sc_s11	chr11	25952692	1661	64.001	38.41
Sc_s12	chr12	31725073	1996	62.916	38.94
Sc_s13	chr13/U	37308593	360	9.649	39.11
Ceratodon purpureus R40
chr_ID	length (bp)	#Genes	Gene density(#genes per Mb)	GC content(%)
Chr01	29001003	3398	117.168	41.47
Chr02	26629683	2957	111.042	41.55
Chr03	25160467	2725	108.305	41.36
Chr04	22785024	2718	119.289	41.1
Chr05	19969424	2070	103.658	41.58
Chr06	18980603	2272	119.701	41.27
Chr07	17972677	1919	106.773	41.31
Chr08	17567963	2019	114.925	41.31
Chr09	17527894	1925	109.825	41.67
Chr10	17229405	1936	112.366	41.38
Chr11	16661191	1750	105.035	41.2
Chr12	16459275	1909	115.983	41.2
V	110524308	3411	30.862	43.28
Ceratodon purpureus GG1
chr_ID	length (bp)	#Genes	Gene density (#genes per Mb)	GC content(%)
Chr01	28665150	3338	116.448	41.38
Chr02	21600040	2493	115.416	41.27
Chr03	23975420	2708	112.949	41.27
Chr04	22447835	2754	122.684	41.22
Chr05	18318762	2004	109.396	41.16
Chr06	18075063	2131	117.897	41.24
Chr07	16155172	1885	116.681	41.14
Chr08	16253085	1963	120.777	41.75
Chr09	16797805	1902	113.229	41.19
Chr10	16572614	1884	113.682	41.22
Chr11	15550627	1695	108.999	40.84
Chr12	15772994	1926	122.107	41.18
U	112179120	3450	30.754	43

## Sheet: Table S4
Table S4 - Generation and screening of a syntelog clustering table by syntenically aligning the Bryopsida genomes to the reconstructed ancestral chromosomes. Genes fell into each row constituted a syntelog cluster.
Ancestral_chr_genes	Bryum argenteum		Pohlia nutans				Hypnum curvifolium		Entodon seductrix		Syntrichia caninervis		Ceratodon purpureus R40		Ceratodon purpureus GG1		Physcomitrium patens				syntelog count	outgroup (from 1KP sequences)	cluster_ID	Ancestral_chrs
abk1g00265	BA06G00570		Poh0042660	Poh0355700	Poh0321340	Poh0340620	Hypnum@jg169.t1	Hypnum@jg27055.t1	Entodon@jg21472.t1	Entodon@jg6324.t1			CepurR40.2G072200	CepurR40.6G208000	CepurGG1@2G095600.1	CepurGG1@6G199400.1	Pp3c14_1200				14	scaffold-HRWG-2070381-Buxbaumia_aphylla	cluster_0000	ABK1
abk1g00288	BA06G00590		Poh0042650	Poh0355710	Poh0321320	Poh0340650		Hypnum@jg27044.t1		Entodon@jg6323.t1			CepurR40.2G072300	CepurR40.6G208200	CepurGG1@2G095400.1	CepurGG1@6G199600.1	Pp3c14_1230				12	scaffold-HRWG-2012150-Buxbaumia_aphylla	cluster_0001	ABK1
abk1g00309	BA06G00640				Poh0321450	Poh0340710		Hypnum@jg27039.t1		Entodon@jg6317.t1	Sc_g09646		CepurR40.2G072500	CepurR40.6G209000	CepurGG1@2G095100.1	CepurGG1@6G200400.1	Pp3c14_1240				11	scaffold-AWOI-2073717-Diphyscium_foliosum	cluster_0002	ABK1
abk1g00328	BA06G00630		Poh0042590	Poh0355760	Poh0321460	Poh0340720	Hypnum@jg162.t1	Hypnum@jg27040.t1	Entodon@jg21466.t1	Entodon@jg6319.t1			CepurR40.2G072700		CepurGG1@2G094900.1		Pp3c14_1270				12	scaffold-AWOI-2008892-Diphyscium_foliosum	cluster_0003	ABK1
abk1g00462	BA06G00670		Poh0042540	Poh0181490	Poh0321560	Poh0340790		Hypnum@jg27032.t1		Entodon@jg6309.t1	Sc_g09652		CepurR40.2G070400	CepurR40.6G210200	CepurGG1@2G097200.1	CepurGG1@6G201600.1	Pp3c14_1450				13	scaffold-AWOI-2070607-Diphyscium_foliosum	cluster_0004	ABK1
abk1g00474	BA06G00700		Poh0042530	Poh0181470	Poh0321580	Poh0340810	Hypnum@jg246.t1	Hypnum@jg27028.t1	Entodon@jg21517.t1	Entodon@jg6305.t1	Sc_g09653		CepurR40.2G069800	CepurR40.6G210400	CepurGG1@2G097300.1	CepurGG1@6G201800.1	Pp3c14_1460				15	scaffold-HRWG-2015392-Buxbaumia_aphylla	cluster_0005	ABK1
abk1g00537	BA06G00800		Poh0042350	Poh0181270	Poh0321700	Poh0340940	Hypnum@jg271.t1	Hypnum@jg27015.t1	Entodon@jg21536.t1	Entodon@jg6294.t1	Sc_g09661	Sc_g06316	CepurR40.2G067900	CepurR40.6G211100	CepurGG1@2G098700.1	CepurGG1@6G202300.1	Pp3c14_1540				16	scaffold-AWOI-2001319-Diphyscium_foliosum	cluster_0006	ABK1
abk1g00543	BA06G00790		Poh0042460	Poh0181280	Poh0321690	Poh0340930	Hypnum@jg266.t1	Hypnum@jg27017.t1	Entodon@jg21532.t1	Entodon@jg6295.t1			CepurR40.2G068000	CepurR40.6G211700	CepurGG1@2G098600.1	CepurGG1@6G202600.1	Pp3c14_1550	Pp3c10_1410			15	scaffold-AWOI-2004957-Diphyscium_foliosum	cluster_0007	ABK1
abk1g00591			Poh0037770	Poh0176510			Hypnum@jg467.t1		Entodon@jg21710.t1		Sc_g09658	Sc_g06323	CepurR40.2G066200	CepurR40.6G210800	CepurGG1@2G099800.1	CepurGG1@6G202100.1	Pp3c14_1610	Pp3c10_1370			12	scaffold-AWOI-2003938-Diphyscium_foliosum	cluster_0008	ABK1
abk1g00640			Poh0037780	Poh0176520	Poh0321710	Poh0340950	Hypnum@jg463.t1		Entodon@jg21706.t1			Sc_g06322	CepurR40.2G066000		CepurGG1@2G099900.1		Pp3c14_1640	Pp3c10_1290			11	scaffold-AWOI-2072719-Diphyscium_foliosum	cluster_0009	ABK1
abk1g01641	BA06G01540				Poh0320660	Poh0339920		Hypnum@jg27155.t1		Entodon@jg6416.t1	Sc_g09521		CepurR40.6G167400		CepurGG1@6G161000.1		Pp3c14_2910	Pp3c10_2580			10	scaffold-AWOI-2073159-Diphyscium_foliosum	cluster_0010	ABK1
abk1g01642	BA06G01520		Poh0041270		Poh0320680	Poh0339900	Hypnum@jg795.t1	Hypnum@jg27158.t1	Entodon@jg22019.t1	Entodon@jg6418.t1	Sc_g09523	Sc_g05785	CepurR40.6G167600	CepurR40.2G289000	CepurGG1@6G161200.1	CepurGG1@2G242300.1	Pp3c14_2970				15	scaffold-AWOI-2073905-Diphyscium_foliosum	cluster_0011	ABK1
abk1g01643	BA06G01530				Poh0320670	Poh0339910	Hypnum@jg792.t1	Hypnum@jg27157.t1	Entodon@jg22018.t1	Entodon@jg6417.t1	Sc_g09522		CepurR40.6G167500	CepurR40.2G289100	CepurGG1@6G161100.1	CepurGG1@2G242400.1	Pp3c14_2960				13	scaffold-AWOI-2012669-Diphyscium_foliosum	cluster_0012	ABK1
abk1g01646	BA06G01530				Poh0320670	Poh0339910	Hypnum@jg792.t1	Hypnum@jg27157.t1	Entodon@jg22018.t1	Entodon@jg6417.t1	Sc_g09522		CepurR40.6G167500	CepurR40.2G289100	CepurGG1@6G161100.1	CepurGG1@2G242400.1	Pp3c14_2960				13	scaffold-AWOI-2012669-Diphyscium_foliosum	cluster_0013	ABK1
abk1g01647	BA06G01530				Poh0320670	Poh0339910	Hypnum@jg792.t1	Hypnum@jg27157.t1	Entodon@jg22018.t1	Entodon@jg6417.t1	Sc_g09522		CepurR40.6G167500	CepurR40.2G289100	CepurGG1@6G161100.1	CepurGG1@2G242400.1	Pp3c14_2960				13	scaffold-AWOI-2012669-Diphyscium_foliosum	cluster_0014	ABK1
abk1g01648	BA06G01530				Poh0320670	Poh0339910	Hypnum@jg792.t1	Hypnum@jg27157.t1	Entodon@jg22018.t1	Entodon@jg6417.t1	Sc_g09522		CepurR40.6G167500	CepurR40.2G289100	CepurGG1@6G161100.1	CepurGG1@2G242400.1	Pp3c14_2960				13	scaffold-AWOI-2012669-Diphyscium_foliosum	cluster_0015	ABK1
abk1g01649	BA06G01530				Poh0320670	Poh0339910	Hypnum@jg792.t1	Hypnum@jg27157.t1	Entodon@jg22018.t1	Entodon@jg6417.t1	Sc_g09522		CepurR40.6G167500	CepurR40.2G289100	CepurGG1@6G161100.1	CepurGG1@2G242400.1	Pp3c14_2960				13	scaffold-AWOI-2012669-Diphyscium_foliosum	cluster_0016	ABK1
abk1g01650	BA06G01530				Poh0320670	Poh0339910	Hypnum@jg792.t1	Hypnum@jg27157.t1	Entodon@jg22018.t1	Entodon@jg6417.t1	Sc_g09522		CepurR40.6G167500	CepurR40.2G289100	CepurGG1@6G161100.1	CepurGG1@2G242400.1	Pp3c14_2960				13	scaffold-AWOI-2012669-Diphyscium_foliosum	cluster_0017	ABK1
abk1g01651	BA06G01520		Poh0041270				Hypnum@jg795.t1	Hypnum@jg27158.t1	Entodon@jg22019.t1	Entodon@jg6418.t1	Sc_g09523	Sc_g05785	CepurR40.6G167600	CepurR40.2G289000	CepurGG1@6G161200.1	CepurGG1@2G242300.1	Pp3c14_2970				13	scaffold-AWOI-2073905-Diphyscium_foliosum	cluster_0018	ABK1
abk1g01674			Poh0040960	Poh0179670			Hypnum@jg844.t1		Entodon@jg22072.t1			Sc_g05754	CepurR40.6G174200	CepurR40.2G285700	CepurGG1@6G167800.1	CepurGG1@2G239100.1	Pp3c14_3280				10	scaffold-HRWG-2014280-Buxbaumia_aphylla	cluster_0019	ABK1
abk1g01675			Poh0040960	Poh0179670			Hypnum@jg844.t1		Entodon@jg22072.t1			Sc_g05754	CepurR40.6G174300	CepurR40.2G285700	CepurGG1@6G167900.1	CepurGG1@2G239100.1	Pp3c14_3280				10	scaffold-AWOI-2073468-Diphyscium_foliosum	cluster_0020	ABK1
abk1g01676			Poh0040960	Poh0179670			Hypnum@jg844.t1		Entodon@jg22072.t1			Sc_g05754	CepurR40.6G174300	CepurR40.2G285700	CepurGG1@6G167900.1	CepurGG1@2G239100.1	Pp3c14_3310				10	scaffold-AWOI-2073468-Diphyscium_foliosum	cluster_0021	ABK1
abk1g01695	BA06G03320		Poh0190170	Poh0179070	Poh0106830	Poh0040180	Hypnum@jg723.t1	Hypnum@jg27764.t1	Entodon@jg21947.t1	Entodon@jg6982.t1	Sc_g09444	Sc_g05988	CepurR40.6G194900	CepurR40.2G255600	CepurGG1@6G186900.1	CepurGG1@2G209900.1	Pp3c14_3550	Pp3c1_21050			17	scaffold-HRWG-2016037-Buxbaumia_aphylla	cluster_0022	ABK1
abk1g01701	BA06G03320		Poh0190170	Poh0179070	Poh0106830	Poh0040180	Hypnum@jg723.t1	Hypnum@jg27764.t1	Entodon@jg21947.t1	Entodon@jg6982.t1	Sc_g09444	Sc_g05988	CepurR40.6G194900	CepurR40.2G255600	CepurGG1@6G186900.1	CepurGG1@2G209900.1	Pp3c14_3550	Pp3c1_21050			17	scaffold-HRWG-2016037-Buxbaumia_aphylla	cluster_0023	ABK1
abk1g01702	BA06G03320		Poh0190170	Poh0179070	Poh0106830	Poh0040180	Hypnum@jg723.t1	Hypnum@jg27764.t1	Entodon@jg21947.t1	Entodon@jg6982.t1	Sc_g09444	Sc_g05988	CepurR40.6G194900	CepurR40.2G255600	CepurGG1@6G186900.1	CepurGG1@2G209900.1	Pp3c14_3550	Pp3c1_21050			17	scaffold-HRWG-2016037-Buxbaumia_aphylla	cluster_0024	ABK1
abk1g01703	BA06G03320		Poh0190170	Poh0179070	Poh0106830	Poh0040180	Hypnum@jg723.t1	Hypnum@jg27764.t1	Entodon@jg21947.t1	Entodon@jg6982.t1	Sc_g09444	Sc_g05988	CepurR40.6G194900	CepurR40.2G255600	CepurGG1@6G186900.1	CepurGG1@2G209900.1	Pp3c14_3550	Pp3c1_21050			17	scaffold-HRWG-2016864-Buxbaumia_aphylla	cluster_0025	ABK1
abk1g01705	BA06G03350		Poh0190140	Poh0179010	Poh0106860	Poh0040230	Hypnum@jg733.t1	Hypnum@jg27758.t1	Entodon@jg21958.t1			Sc_g05981	CepurR40.6G195500	CepurR40.2G256100	CepurGG1@6G187200.1	CepurGG1@2G210400.1					13	scaffold-AWOI-2010746-Diphyscium_foliosum	cluster_0026	ABK1
abk1g01708	BA06G03340		Poh0190150	Poh0179050	Poh0106850	Poh0040200	Hypnum@jg729.t1	Hypnum@jg27760.t1	Entodon@jg21954.t1	Entodon@jg6985.t1	Sc_g09443		CepurR40.6G195300	CepurR40.2G255800		CepurGG1@2G210100.1	Pp3c14_3580	Pp3c1_21000			15	scaffold-AWOI-2070636-Diphyscium_foliosum	cluster_0027	ABK1
abk1g01710	BA06G03340		Poh0190150	Poh0179050	Poh0106850	Poh0040200	Hypnum@jg729.t1	Hypnum@jg27760.t1	Entodon@jg21954.t1	Entodon@jg6985.t1	Sc_g09443		CepurR40.6G195300	CepurR40.2G255800		CepurGG1@2G210100.1	Pp3c14_3580	Pp3c1_21000			15	scaffold-AWOI-2070636-Diphyscium_foliosum	cluster_0028	ABK1
abk1g01720	BA06G03150		Poh0189940		Poh0107050			Hypnum@jg27787.t1		Entodon@jg6963.t1	Sc_g09461		CepurR40.6G198200		CepurGG1@6G190000.1		Pp3c14_3730	Pp3c1_20790			10	scaffold-AWOI-2072705-Diphyscium_foliosum	cluster_0029	ABK1
abk1g01723	BA06G03150		Poh0189940		Poh0107050			Hypnum@jg27787.t1		Entodon@jg6963.t1	Sc_g09461		CepurR40.6G198200		CepurGG1@6G190000.1		Pp3c14_3730	Pp3c1_20790			10	scaffold-AWOI-2072705-Diphyscium_foliosum	cluster_0030	ABK1
abk1g01724	BA06G03150		Poh0189940		Poh0107050			Hypnum@jg27787.t1		Entodon@jg6963.t1	Sc_g09461		CepurR40.6G198200		CepurGG1@6G190000.1		Pp3c14_3730	Pp3c1_20790			10	scaffold-AWOI-2072705-Diphyscium_foliosum	cluster_0031	ABK1
abk1g01726	BA06G03150		Poh0189940		Poh0107050			Hypnum@jg27787.t1		Entodon@jg6963.t1	Sc_g09461		CepurR40.6G198200		CepurGG1@6G190000.1		Pp3c14_3730	Pp3c1_20790			10	scaffold-AWOI-2072705-Diphyscium_foliosum	cluster_0032	ABK1
abk1g01728	BA06G03160		Poh0189950		Poh0107060			Hypnum@jg27786.t1		Entodon@jg6965.t1	Sc_g09460		CepurR40.6G198400		CepurGG1@6G190200.1		Pp3c14_3750	Pp3c1_20810			10	scaffold-AWOI-2013103-Diphyscium_foliosum	cluster_0033	ABK1
abk1g01729	BA06G03150		Poh0189940		Poh0107050			Hypnum@jg27787.t1		Entodon@jg6963.t1	Sc_g09461		CepurR40.6G198200		CepurGG1@6G190000.1		Pp3c14_3730	Pp3c1_20790			10	scaffold-AWOI-2072705-Diphyscium_foliosum	cluster_0034	ABK1
abk1g01730	BA06G03160		Poh0189950		Poh0107060			Hypnum@jg27786.t1		Entodon@jg6965.t1	Sc_g09460		CepurR40.6G198400		CepurGG1@6G190200.1		Pp3c14_3750	Pp3c1_20810			10	scaffold-AWOI-2013103-Diphyscium_foliosum	cluster_0035	ABK1
abk1g01731	BA06G03160		Poh0189950		Poh0107060			Hypnum@jg27786.t1		Entodon@jg6965.t1	Sc_g09460		CepurR40.6G198400		CepurGG1@6G190200.1		Pp3c14_3750	Pp3c1_20810			10	scaffold-AWOI-2013103-Diphyscium_foliosum	cluster_0036	ABK1
abk1g01732	BA06G03160		Poh0189950		Poh0107060			Hypnum@jg27786.t1		Entodon@jg6965.t1	Sc_g09460		CepurR40.6G198400		CepurGG1@6G190200.1		Pp3c14_3750	Pp3c1_20810			10	scaffold-AWOI-2013103-Diphyscium_foliosum	cluster_0037	ABK1
abk1g01738	BA06G06890		Poh0039990	Poh0178810			Hypnum@jg760.t1		Entodon@jg21985.t1				CepurR40.2G276500	CepurR40.6G165900	CepurGG1@6G159500.1	CepurGG1@2G230700.1	Pp3c14_3790				10	scaffold-AWOI-2071209-Diphyscium_foliosum	cluster_0038	ABK1
abk1g01742	BA06G06890		Poh0039990	Poh0178810			Hypnum@jg760.t1		Entodon@jg21985.t1				CepurR40.2G276500	CepurR40.6G165900	CepurGG1@6G159500.1	CepurGG1@2G230700.1	Pp3c14_3810				10	scaffold-AWOI-2071209-Diphyscium_foliosum	cluster_0039	ABK1
abk1g01743	BA06G06890		Poh0039990	Poh0178810			Hypnum@jg760.t1		Entodon@jg21985.t1				CepurR40.2G276500	CepurR40.6G165900	CepurGG1@6G159500.1	CepurGG1@2G230700.1	Pp3c14_3790				10	scaffold-AWOI-2071209-Diphyscium_foliosum	cluster_0040	ABK1
abk1g01746	BA06G06890		Poh0039990	Poh0178810			Hypnum@jg760.t1		Entodon@jg21985.t1				CepurR40.2G276500	CepurR40.6G165900	CepurGG1@6G159500.1	CepurGG1@2G230700.1	Pp3c14_3790				10	scaffold-AWOI-2071209-Diphyscium_foliosum	cluster_0041	ABK1
abk1g01768	BA06G06990		Poh0040040	Poh0179200	Poh0190340	Poh0106670	Hypnum@jg27806.t1		Entodon@jg22128.t1	Entodon@jg6938.t1			CepurR40.2G275500	CepurR40.6G164500	CepurGG1@6G157900.1	CepurGG1@2G229300.1	Pp3c14_4080	Pp3c10_5750			14	scaffold-AWOI-2072446-Diphyscium_foliosum	cluster_0042	ABK1
abk1g01769	BA06G06990		Poh0040040	Poh0179200	Poh0190340	Poh0106670	Hypnum@jg27806.t1		Entodon@jg22128.t1	Entodon@jg6938.t1			CepurR40.2G275500	CepurR40.6G164500	CepurGG1@6G157900.1	CepurGG1@2G229300.1	Pp3c14_4080	Pp3c10_5750			14	scaffold-AWOI-2072446-Diphyscium_foliosum	cluster_0043	ABK1
abk1g01772	BA06G06990		Poh0040040	Poh0179200	Poh0190340	Poh0106670	Hypnum@jg27806.t1		Entodon@jg22128.t1	Entodon@jg6938.t1			CepurR40.2G275500	CepurR40.6G164500	CepurGG1@6G157900.1	CepurGG1@2G229300.1	Pp3c14_4080	Pp3c10_5750			14	scaffold-AWOI-2072446-Diphyscium_foliosum	cluster_0044	ABK1
abk1g01773				Poh0179230			Hypnum@jg904.t1		Entodon@jg22115.t1		Sc_g09476	Sc_g05833	CepurR40.2G281700	CepurR40.6G163200	CepurGG1@6G156700.1	CepurGG1@2G235400.1	Pp3c14_4100				10	scaffold-HRWG-2005848-Buxbaumia_aphylla	cluster_0045	ABK1
abk1g01779				Poh0179230	Poh0190430	Poh0106570	Hypnum@jg904.t1		Entodon@jg22115.t1	Entodon@jg6915.t1	Sc_g09476	Sc_g05833	CepurR40.2G281700	CepurR40.6G163200	CepurGG1@6G156700.1	CepurGG1@2G235400.1	Pp3c14_4160				13	scaffold-HRWG-2005848-Buxbaumia_aphylla	cluster_0046	ABK1
abk1g01780				Poh0179230	Poh0190430	Poh0106570	Hypnum@jg904.t1		Entodon@jg22115.t1	Entodon@jg6915.t1	Sc_g09476	Sc_g05833	CepurR40.2G281700	CepurR40.6G163200	CepurGG1@6G156700.1	CepurGG1@2G235400.1	Pp3c14_4160				13	scaffold-HRWG-2005848-Buxbaumia_aphylla	cluster_0047	ABK1
abk1g01783				Poh0179240	Poh0190440	Poh0106570	Hypnum@jg904.t1		Entodon@jg22115.t1	Entodon@jg6915.t1	Sc_g09476	Sc_g05833	CepurR40.2G281700	CepurR40.6G163200	CepurGG1@6G156700.1	CepurGG1@2G235400.1	Pp3c14_4160				13	scaffold-HRWG-2005848-Buxbaumia_aphylla	cluster_0048	ABK1
abk1g01789				Poh0179320			Hypnum@jg901.t1		Entodon@jg22112.t1			Sc_g05836	CepurR40.2G281000	CepurR40.6G162300	CepurGG1@6G156100.1	CepurGG1@2G234700.1	Pp3c14_4240	Pp3c10_5860			10	scaffold-AWOI-2014028-Diphyscium_foliosum	cluster_0049	ABK1
abk1g01790				Poh0179320			Hypnum@jg901.t1		Entodon@jg22112.t1			Sc_g05836	CepurR40.2G281000	CepurR40.6G162300	CepurGG1@6G156100.1	CepurGG1@2G234700.1	Pp3c14_4240	Pp3c10_5860			10	scaffold-AWOI-2014028-Diphyscium_foliosum	cluster_0050	ABK1
abk1g01792			Poh0178330	Poh0039540			Hypnum@jg1154.t1		Entodon@jg22328.t1		Sc_g06280		CepurR40.2G221800			CepurGG1@2G173800.1	Pp3c14_4310	Pp3c10_4950	Pp3c1_21550		10	scaffold-HRWG-2070290-Buxbaumia_aphylla	cluster_0051	ABK1
abk1g01811			Poh0178330	Poh0039540			Hypnum@jg1154.t1		Entodon@jg22328.t1		Sc_g06280		CepurR40.2G221800			CepurGG1@2G173800.1	Pp3c14_4310	Pp3c10_4950	Pp3c1_21550		10	scaffold-AWOI-2072508-Diphyscium_foliosum	cluster_0052	ABK1
abk1g01812			Poh0178330	Poh0039540			Hypnum@jg1154.t1		Entodon@jg22328.t1		Sc_g06280		CepurR40.2G221800			CepurGG1@2G173800.1	Pp3c14_4310	Pp3c10_4950	Pp3c1_21550		10	scaffold-AWOI-2072508-Diphyscium_foliosum	cluster_0053	ABK1
abk1g01826			Poh0178480	Poh0039670							Sc_g06388		CepurR40.2G220800	CepurR40.6G187600	CepurGG1@6G180600.1	CepurGG1@2G173100.1	Pp3c14_4540	Pp3c10_4040	Pp3c1_21270		10	scaffold-AWOI-2072429-Diphyscium_foliosum	cluster_0054	ABK1
abk1g01831			Poh0178480	Poh0039670							Sc_g06388		CepurR40.2G220800	CepurR40.6G187600	CepurGG1@6G180600.1	CepurGG1@2G173100.1	Pp3c14_4540	Pp3c10_4040	Pp3c1_21270		10	scaffold-HRWG-2002371-Buxbaumia_aphylla	cluster_0055	ABK1
abk1g01832			Poh0178480	Poh0039670							Sc_g06388		CepurR40.2G220800	CepurR40.6G187600	CepurGG1@6G180600.1	CepurGG1@2G173100.1	Pp3c14_4540	Pp3c10_4040	Pp3c1_21270		10	scaffold-AWOI-2072429-Diphyscium_foliosum	cluster_0056	ABK1
abk1g01833			Poh0178480	Poh0039670							Sc_g06388		CepurR40.2G220800	CepurR40.6G187600	CepurGG1@6G180600.1	CepurGG1@2G173100.1	Pp3c14_4540	Pp3c10_4040	Pp3c1_21270		10	scaffold-AWOI-2072429-Diphyscium_foliosum	cluster_0057	ABK1
abk1g01834			Poh0178500	Poh0039680			Hypnum@jg1174.t1		Entodon@jg22344.t1		Sc_g06386		CepurR40.2G221200	CepurR40.6G187000	CepurGG1@6G180200.1	CepurGG1@2G173300.1	Pp3c14_4570				10	scaffold-AWOI-2012382-Diphyscium_foliosum	cluster_0058	ABK1
abk1g01845			Poh0178540	Poh0039700			Hypnum@jg1187.t1		Entodon@jg22353.t1		Sc_g06384		CepurR40.2G221400	CepurR40.6G186300	CepurGG1@6G179200.1	CepurGG1@2G173500.1	Pp3c14_4760	Pp3c10_3890			11	scaffold-AWOI-2011517-Diphyscium_foliosum	cluster_0059	ABK1
abk1g01876			Poh0177840	Poh0039080			Hypnum@jg1103.t1		Entodon@jg22288.t1		Sc_g06079		CepurR40.2G226000	CepurR40.6G193000	CepurGG1@2G178500.1	CepurGG1@6G185400.1	Pp3c14_5200	Pp3c10_5480			11	scaffold-HRWG-2014860-Buxbaumia_aphylla	cluster_0060	ABK1
abk1g01877			Poh0177840	Poh0039080			Hypnum@jg1103.t1		Entodon@jg22288.t1		Sc_g06079		CepurR40.2G226000	CepurR40.6G193000	CepurGG1@2G178500.1	CepurGG1@6G185400.1	Pp3c14_5200	Pp3c10_5480			11	scaffold-HRWG-2014860-Buxbaumia_aphylla	cluster_0061	ABK1
abk1g01879			Poh0177840	Poh0039080			Hypnum@jg1103.t1		Entodon@jg22288.t1		Sc_g06079		CepurR40.2G226000	CepurR40.6G193000	CepurGG1@2G178500.1	CepurGG1@6G185400.1	Pp3c14_5200	Pp3c10_5480			11	scaffold-HRWG-2014860-Buxbaumia_aphylla	cluster_0062	ABK1
abk1g01996			Poh0175840	Poh0037150			Hypnum@jg592.t1		Entodon@jg21818.t1		Sc_g05950		CepurR40.6G132200	CepurR40.2G243600	CepurGG1@6G127000.1	CepurGG1@2G197700.1	Pp3c14_6300	Pp3c17_11764			11	scaffold-HRWG-2017406-Buxbaumia_aphylla	cluster_0063	ABK1
abk1g02000			Poh0175870	Poh0037180			Hypnum@jg587.t1		Entodon@jg21816.t1		Sc_g05951		CepurR40.6G132000	CepurR40.2G243400	CepurGG1@6G126800.1	CepurGG1@2G197300.1	Pp3c14_6380	Pp3c17_11870			11	#N/A	cluster_0064	ABK1
abk1g02009	BA06G09970		Poh0100250	Poh0310740			Hypnum@jg28313.t1		Entodon@jg7455.t1		Sc_g08645		CepurR40.6G004900	CepurR40.2G215500	CepurGG1@6G004600.1	CepurGG1@2G165200.1	Pp3c14_6570				11	scaffold-AWOI-2006921-Diphyscium_foliosum	cluster_0065	ABK1
abk1g02013	BA06G09970		Poh0100250	Poh0310740			Hypnum@jg28313.t1		Entodon@jg7455.t1		Sc_g08645		CepurR40.6G004900	CepurR40.2G215500	CepurGG1@6G004600.1	CepurGG1@2G165200.1	Pp3c14_6570				11	scaffold-AWOI-2006921-Diphyscium_foliosum	cluster_0066	ABK1
abk1g02014	BA06G09970		Poh0100250	Poh0310740			Hypnum@jg28313.t1		Entodon@jg7455.t1		Sc_g08645		CepurR40.6G004900	CepurR40.2G215500	CepurGG1@6G004600.1	CepurGG1@2G165200.1	Pp3c14_6570				11	scaffold-AWOI-2006921-Diphyscium_foliosum	cluster_0067	ABK1
abk1g02022			Poh0100360	Poh0310620			Hypnum@jg28330.t1		Entodon@jg7439.t1		Sc_g08640		CepurR40.6G006500	CepurR40.2G214800	CepurGG1@6G005900.1	CepurGG1@2G164600.1	Pp3c14_6650				10	scaffold-AWOI-2014850-Diphyscium_foliosum	cluster_0068	ABK1
abk1g02025			Poh0100360	Poh0310620			Hypnum@jg28330.t1		Entodon@jg7439.t1		Sc_g08640		CepurR40.6G006500	CepurR40.2G214800	CepurGG1@6G005900.1	CepurGG1@2G164600.1	Pp3c14_6650				10	scaffold-HRWG-2010098-Buxbaumia_aphylla	cluster_0069	ABK1
abk1g02058			Poh0177990	Poh0039200			Hypnum@jg1087.t1	Hypnum@jg27420.t1	Entodon@jg22272.t1	Entodon@jg6650.t1	Sc_g06135		CepurR40.2G228200		CepurGG1@2G180400.1		Pp3c14_7160				10	scaffold-AWOI-2013348-Diphyscium_foliosum	cluster_0070	ABK1
abk1g02060			Poh0177960	Poh0039220			Hypnum@jg1089.t1	Hypnum@jg27419.t1	Entodon@jg22274.t1	Entodon@jg6649.t1	Sc_g06138		CepurR40.2G227900		CepurGG1@2G180000.1		Pp3c14_7180				10	scaffold-HRWG-2003083-Buxbaumia_aphylla	cluster_0071	ABK1
abk1g02061			Poh0177990	Poh0039200			Hypnum@jg1087.t1	Hypnum@jg27420.t1	Entodon@jg22272.t1	Entodon@jg6650.t1	Sc_g06135		CepurR40.2G228200		CepurGG1@2G180400.1		Pp3c14_7160				10	scaffold-AWOI-2013348-Diphyscium_foliosum	cluster_0072	ABK1
abk1g02062			Poh0177960	Poh0039220			Hypnum@jg1089.t1	Hypnum@jg27419.t1	Entodon@jg22274.t1	Entodon@jg6649.t1	Sc_g06138		CepurR40.2G227900		CepurGG1@2G180000.1		Pp3c14_7180				10	scaffold-AWOI-2066672-Diphyscium_foliosum	cluster_0073	ABK1
abk1g02063			Poh0177990	Poh0039200			Hypnum@jg1087.t1	Hypnum@jg27420.t1	Entodon@jg22272.t1	Entodon@jg6650.t1	Sc_g06135		CepurR40.2G228200		CepurGG1@2G180400.1		Pp3c14_7160				10	scaffold-AWOI-2013348-Diphyscium_foliosum	cluster_0074	ABK1
abk1g02070			Poh0177960	Poh0039220			Hypnum@jg1089.t1	Hypnum@jg27419.t1	Entodon@jg22274.t1	Entodon@jg6649.t1	Sc_g06138	Sc_g06081	CepurR40.2G227900		CepurGG1@2G180000.1		Pp3c14_7180				11	scaffold-HRWG-2003083-Buxbaumia_aphylla	cluster_0075	ABK1
abk1g02072			Poh0177960	Poh0039220			Hypnum@jg1089.t1	Hypnum@jg27419.t1	Entodon@jg22274.t1	Entodon@jg6649.t1	Sc_g06138	Sc_g06081	CepurR40.2G227900		CepurGG1@2G180000.1		Pp3c14_7180				11	scaffold-AWOI-2066672-Diphyscium_foliosum	cluster_0076	ABK1
abk1g02073			Poh0177960	Poh0039220			Hypnum@jg1089.t1	Hypnum@jg27419.t1	Entodon@jg22274.t1	Entodon@jg6649.t1	Sc_g06138	Sc_g06081	CepurR40.2G227900		CepurGG1@2G180000.1		Pp3c14_7180				11	scaffold-AWOI-2066672-Diphyscium_foliosum	cluster_0077	ABK1
abk1g02097	BA06G11490		Poh0310550	Poh0100410	Poh0042370		Hypnum@jg28338.t1			Entodon@jg7429.t1	Sc_g06369	Sc_g08518	CepurR40.2G213000	CepurR40.6G009900	CepurGG1@2G163100.1	CepurGG1@6G008000.1	Pp3c14_7550	Pp3c10_8090	Pp3c1_34400		15	scaffold-AWOI-2072358-Diphyscium_foliosum	cluster_0078	ABK1
abk1g02098	BA06G11480		Poh0310540		Poh0042370		Hypnum@jg28339.t1			Entodon@jg7428.t1	Sc_g06369	Sc_g08516	CepurR40.2G213000	CepurR40.6G010000	CepurGG1@2G163100.1	CepurGG1@6G008100.1	Pp3c14_7550	Pp3c10_8090	Pp3c1_34390		14	scaffold-AWOI-2065962-Diphyscium_foliosum	cluster_0079	ABK1
abk1g02099	BA06G11510		Poh0310570	Poh0100390			Hypnum@jg28335.t1			Entodon@jg7433.t1	Sc_g06376		CepurR40.2G212700		CepurGG1@2G162700.1		Pp3c14_7530		Pp3c1_34530		10	scaffold-HRWG-2010264-Buxbaumia_aphylla	cluster_0080	ABK1
abk1g02102	BA06G11510		Poh0310570	Poh0100390			Hypnum@jg28335.t1			Entodon@jg7433.t1	Sc_g06376		CepurR40.2G212700		CepurGG1@2G162700.1		Pp3c14_7530		Pp3c1_34530		10	scaffold-HRWG-2010264-Buxbaumia_aphylla	cluster_0081	ABK1
abk1g02104	BA06G11480		Poh0310540	Poh0100410	Poh0042370		Hypnum@jg28339.t1			Entodon@jg7428.t1	Sc_g06369	Sc_g08516	CepurR40.2G213000	CepurR40.6G010000	CepurGG1@2G163100.1	CepurGG1@6G008100.1	Pp3c14_7550	Pp3c10_8090	Pp3c1_34390		15	scaffold-AWOI-2067332-Diphyscium_foliosum	cluster_0082	ABK1
abk1g02106			Poh0310530	Poh0100420	Poh0042330						Sc_g06371	Sc_g08519	CepurR40.2G213300	CepurR40.6G010500		CepurGG1@6G008600.1	Pp3c14_7570	Pp3c10_8040	Pp3c1_34380		11	#N/A	cluster_0083	ABK1
abk1g02108			Poh0310530	Poh0100420	Poh0042330						Sc_g06371	Sc_g08519	CepurR40.2G213300	CepurR40.6G010500		CepurGG1@6G008600.1	Pp3c14_7570	Pp3c10_8040	Pp3c1_34380		11	#N/A	cluster_0084	ABK1
abk1g02110			Poh0310530	Poh0100420	Poh0042330						Sc_g06371	Sc_g08519	CepurR40.2G213300	CepurR40.6G010500		CepurGG1@6G008600.1	Pp3c14_7570	Pp3c10_8040	Pp3c1_34380		11	#N/A	cluster_0085	ABK1
abk1g02114					Poh0042310		Hypnum@jg280.t1		Entodon@jg21543.t1		Sc_g06368	Sc_g08521	CepurR40.2G213800	CepurR40.6G010800	CepurGG1@2G163700.1	CepurGG1@6G009000.1	Pp3c14_7690				10	scaffold-AWOI-2007396-Diphyscium_foliosum	cluster_0086	ABK1
abk1g02150			Poh0180550	Poh0041680			Hypnum@jg312.t1		Entodon@jg21570.t1		Sc_g08648		CepurR40.2G208800	CepurR40.6G004200	CepurGG1@2G167500.1	CepurGG1@6G004000.1	Pp3c14_8440				10	scaffold-HRWG-2005143-Buxbaumia_aphylla	cluster_0087	ABK1
abk1g02153			Poh0180550	Poh0041680			Hypnum@jg312.t1		Entodon@jg21570.t1		Sc_g08648		CepurR40.2G208800	CepurR40.6G004200	CepurGG1@2G167500.1	CepurGG1@6G004000.1	Pp3c14_8440				10	scaffold-HRWG-2005143-Buxbaumia_aphylla	cluster_0088	ABK1
abk1g02154			Poh0180550	Poh0041680			Hypnum@jg312.t1		Entodon@jg21570.t1		Sc_g08648		CepurR40.2G208800	CepurR40.6G004200	CepurGG1@2G167500.1	CepurGG1@6G004000.1	Pp3c14_8440				10	scaffold-HRWG-2005143-Buxbaumia_aphylla	cluster_0089	ABK1
abk1g02155			Poh0180550	Poh0041680			Hypnum@jg312.t1		Entodon@jg21570.t1		Sc_g08648		CepurR40.2G208800	CepurR40.6G004200	CepurGG1@2G167500.1	CepurGG1@6G004000.1	Pp3c14_8440				10	scaffold-HRWG-2005143-Buxbaumia_aphylla	cluster_0090	ABK1
abk1g02156			Poh0180550	Poh0041680			Hypnum@jg312.t1		Entodon@jg21570.t1		Sc_g08648		CepurR40.2G208800	CepurR40.6G004200	CepurGG1@2G167500.1	CepurGG1@6G004000.1	Pp3c14_8440				10	scaffold-HRWG-2005143-Buxbaumia_aphylla	cluster_0091	ABK1
abk1g00030	BA06G02840		Poh0178110	Poh0105910	Poh0191240	Poh0039330	Hypnum@jg27632.t1	Hypnum@jg1052.t1	Entodon@jg22255.t1	Entodon@jg6827.t1	Sc_g05904	Sc_g09713	CepurR40.6G151400	CepurR40.2G231800	CepurGG1@6G145600.1	CepurGG1@2G184500.1	Pp3c14_10390	Pp3c17_14130	Pp3c1_23790		18	scaffold-AWOI-2000977-Diphyscium_foliosum	cluster_0092	ABK1
abk1g00034	BA06G02840		Poh0178110	Poh0105910	Poh0191240	Poh0039330	Hypnum@jg27632.t1	Hypnum@jg1052.t1	Entodon@jg22255.t1	Entodon@jg6827.t1	Sc_g05904	Sc_g09713	CepurR40.6G151400	CepurR40.2G231800	CepurGG1@6G145600.1	CepurGG1@2G184500.1	Pp3c14_10390	Pp3c17_14130	Pp3c1_23790		18	scaffold-AWOI-2000977-Diphyscium_foliosum	cluster_0093	ABK1
abk1g00035	BA06G02730		Poh0178130	Poh0105970	Poh0191180	Poh0039350	Hypnum@jg27642.t1	Hypnum@jg1047.t1	Entodon@jg22250.t1	Entodon@jg6833.t1	Sc_g05907		CepurR40.6G151000	CepurR40.2G232100	CepurGG1@6G145200.1	CepurGG1@2G184800.1	Pp3c14_10430	Pp3c17_14090	Pp3c1_23940		17	scaffold-AWOI-2013271-Diphyscium_foliosum	cluster_0094	ABK1
abk1g00036	BA06G02840		Poh0178110	Poh0105910	Poh0191240	Poh0039330	Hypnum@jg27632.t1	Hypnum@jg1052.t1	Entodon@jg22255.t1	Entodon@jg6827.t1	Sc_g05904	Sc_g09713	CepurR40.6G151400	CepurR40.2G231800	CepurGG1@6G145600.1	CepurGG1@2G184500.1	Pp3c14_10390	Pp3c17_14130	Pp3c1_23790		18	scaffold-AWOI-2000977-Diphyscium_foliosum	cluster_0095	ABK1
abk1g00037	BA06G02840		Poh0178110	Poh0105910	Poh0191240	Poh0039330	Hypnum@jg27632.t1	Hypnum@jg1052.t1	Entodon@jg22255.t1	Entodon@jg6827.t1	Sc_g05904	Sc_g09713	CepurR40.6G151400	CepurR40.2G231800	CepurGG1@6G145600.1	CepurGG1@2G184500.1	Pp3c14_10390	Pp3c17_14130	Pp3c1_23790		18	scaffold-AWOI-2000977-Diphyscium_foliosum	cluster_0096	ABK1
abk1g00038	BA06G02730		Poh0178130	Poh0105970	Poh0191180	Poh0039350	Hypnum@jg27640.t1	Hypnum@jg1047.t1	Entodon@jg22250.t1	Entodon@jg6834.t1	Sc_g05907		CepurR40.6G151000	CepurR40.2G232100	CepurGG1@6G145200.1	CepurGG1@2G184800.1	Pp3c14_10430	Pp3c17_14090	Pp3c1_23960		17	scaffold-HRWG-2002211-Buxbaumia_aphylla	cluster_0097	ABK1
abk1g00039	BA06G02730		Poh0178130	Poh0105970	Poh0191180	Poh0039350	Hypnum@jg27642.t1	Hypnum@jg1047.t1	Entodon@jg22250.t1	Entodon@jg6833.t1	Sc_g05907		CepurR40.6G151000	CepurR40.2G232100	CepurGG1@6G145200.1	CepurGG1@2G184800.1	Pp3c14_10430	Pp3c17_14090	Pp3c1_23940		17	scaffold-HRWG-2002211-Buxbaumia_aphylla	cluster_0098	ABK1
abk1g00044	BA06G02730		Poh0178130	Poh0105980	Poh0191180	Poh0039350	Hypnum@jg27642.t1	Hypnum@jg1047.t1	Entodon@jg22250.t1	Entodon@jg6833.t1	Sc_g05907		CepurR40.6G151000	CepurR40.2G232100	CepurGG1@6G145200.1	CepurGG1@2G184800.1	Pp3c14_10430	Pp3c17_14090	Pp3c1_23940		17	scaffold-HRWG-2002211-Buxbaumia_aphylla	cluster_0099	ABK1
abk1g00045	BA06G02730		Poh0178130	Poh0105980	Poh0191170	Poh0039350	Hypnum@jg27640.t1			Entodon@jg6833.t1	Sc_g05907			CepurR40.2G232100		CepurGG1@2G184800.1	Pp3c14_10460	Pp3c17_14090	Pp3c1_23960		13	scaffold-HRWG-2002211-Buxbaumia_aphylla	cluster_0100	ABK1
abk1g00047	BA06G02700		Poh0177770	Poh0106000	Poh0191150		Hypnum@jg27645.t1	Hypnum@jg1046.t1	Entodon@jg22249.t1	Entodon@jg6841.t1	Sc_g05899			CepurR40.2G232600		CepurGG1@2G185500.1			Pp3c1_23930		12	scaffold-AWOI-2001087-Diphyscium_foliosum	cluster_0101	ABK1
abk1g00049	BA06G02700		Poh0177770	Poh0106000	Poh0191150		Hypnum@jg27645.t1	Hypnum@jg1046.t1	Entodon@jg22249.t1	Entodon@jg6841.t1	Sc_g05899			CepurR40.2G232600		CepurGG1@2G185500.1			Pp3c1_23930		12	scaffold-AWOI-2001087-Diphyscium_foliosum	cluster_0102	ABK1
abk1g00050	BA06G02680		Poh0177750	Poh0106010	Poh0191140		Hypnum@jg27647.t1	Hypnum@jg1042.t1	Entodon@jg22246.t1	Entodon@jg6843.t1	Sc_g05894		CepurR40.6G152900		CepurGG1@6G147400.1		Pp3c14_10480	Pp3c17_14060			13	scaffold-HRWG-2069320-Buxbaumia_aphylla	cluster_0103	ABK1
abk1g00051	BA06G02680		Poh0177750	Poh0106010	Poh0191140		Hypnum@jg27647.t1	Hypnum@jg1042.t1	Entodon@jg22246.t1	Entodon@jg6843.t1	Sc_g05894		CepurR40.6G152900		CepurGG1@6G147400.1		Pp3c14_10480	Pp3c17_14060			13	scaffold-HRWG-2069320-Buxbaumia_aphylla	cluster_0104	ABK1
abk1g00052	BA06G02720			Poh0105990	Poh0191160		Hypnum@jg27643.t1			Entodon@jg6832.t1			CepurR40.6G152800	CepurR40.2G232500	CepurGG1@6G147300.1	CepurGG1@2G185400.1	Pp3c14_10470				10	scaffold-AWOI-2070749-Diphyscium_foliosum	cluster_0105	ABK1
abk1g00054	BA06G02700		Poh0177770	Poh0106000	Poh0191150		Hypnum@jg27645.t1	Hypnum@jg1046.t1	Entodon@jg22249.t1	Entodon@jg6841.t1	Sc_g05899			CepurR40.2G232600		CepurGG1@2G185500.1			Pp3c1_23930		12	scaffold-AWOI-2001087-Diphyscium_foliosum	cluster_0106	ABK1
abk1g00056	BA06G02700		Poh0177770	Poh0106000	Poh0191150		Hypnum@jg27645.t1		Entodon@jg22249.t1	Entodon@jg6841.t1	Sc_g05899			CepurR40.2G232600		CepurGG1@2G185500.1			Pp3c1_23930		11	scaffold-AWOI-2001087-Diphyscium_foliosum	cluster_0107	ABK1
abk1g00058	BA06G02720			Poh0105990	Poh0191160		Hypnum@jg27643.t1			Entodon@jg6832.t1			CepurR40.6G152800	CepurR40.2G232500	CepurGG1@6G147300.1	CepurGG1@2G185400.1	Pp3c14_10470				10	scaffold-AWOI-2070749-Diphyscium_foliosum	cluster_0108	ABK1
abk1g00060	BA06G02720			Poh0105990	Poh0191160		Hypnum@jg27643.t1			Entodon@jg6832.t1			CepurR40.6G152800	CepurR40.2G232500	CepurGG1@6G147300.1	CepurGG1@2G185400.1	Pp3c14_10470				10	scaffold-AWOI-2070749-Diphyscium_foliosum	cluster_0109	ABK1
abk1g00061	BA06G02720			Poh0105990	Poh0191160		Hypnum@jg27643.t1			Entodon@jg6832.t1			CepurR40.6G152800	CepurR40.2G232500	CepurGG1@6G147300.1	CepurGG1@2G185400.1	Pp3c14_10470				10	scaffold-AWOI-2070749-Diphyscium_foliosum	cluster_0110	ABK1
abk1g00062			Poh0177750	Poh0106010	Poh0191140		Hypnum@jg27647.t1	Hypnum@jg1042.t1	Entodon@jg22246.t1	Entodon@jg6843.t1	Sc_g05894		CepurR40.6G152900		CepurGG1@6G147400.1		Pp3c14_10480	Pp3c17_14060			12	scaffold-HRWG-2069320-Buxbaumia_aphylla	cluster_0111	ABK1
abk1g00067			Poh0177750	Poh0106010	Poh0191140		Hypnum@jg27647.t1	Hypnum@jg1042.t1	Entodon@jg22246.t1	Entodon@jg6843.t1	Sc_g05894		CepurR40.6G152900		CepurGG1@6G147400.1		Pp3c14_10480	Pp3c17_14060			12	scaffold-HRWG-2069320-Buxbaumia_aphylla	cluster_0112	ABK1
abk1g00068			Poh0177750	Poh0106010	Poh0191140		Hypnum@jg27647.t1	Hypnum@jg1042.t1	Entodon@jg22246.t1	Entodon@jg6843.t1	Sc_g05894		CepurR40.6G152900		CepurGG1@6G147400.1		Pp3c14_10480	Pp3c17_14060			12	scaffold-HRWG-2069320-Buxbaumia_aphylla	cluster_0113	ABK1
abk1g00069			Poh0177750	Poh0106010	Poh0191140		Hypnum@jg27647.t1	Hypnum@jg1042.t1	Entodon@jg22246.t1	Entodon@jg6843.t1	Sc_g05894		CepurR40.6G152900		CepurGG1@6G147400.1		Pp3c14_10480	Pp3c17_14060			12	scaffold-HRWG-2069320-Buxbaumia_aphylla	cluster_0114	ABK1
abk1g00070			Poh0177750	Poh0106010	Poh0191140		Hypnum@jg27647.t1	Hypnum@jg1042.t1	Entodon@jg22246.t1	Entodon@jg6843.t1	Sc_g05894		CepurR40.6G152900		CepurGG1@6G147400.1		Pp3c14_10480	Pp3c17_14060			12	scaffold-HRWG-2069320-Buxbaumia_aphylla	cluster_0115	ABK1
abk1g00090	BA11G02600	BA06G08120	Poh0199080	Poh0296320			Hypnum@jg28052.t1		Entodon@jg7173.t1					CepurR40.6G107600		CepurGG1@6G103800.1	Pp3c14_10900	Pp3c17_10850			10	scaffold-AWOI-2005487-Diphyscium_foliosum	cluster_0116	ABK1
abk1g00095		BA06G07970			Poh0195290	Poh0101500	Hypnum@jg28062.t1		Entodon@jg7166.t1		Sc_g09005	Sc_g06542		CepurR40.6G106500		CepurGG1@6G102800.1	Pp3c14_11040	Pp3c17_10600			11	scaffold-AWOI-2013326-Diphyscium_foliosum	cluster_0117	ABK1
abk1g00096	BA11G02730	BA06G07970	Poh0198950		Poh0195290	Poh0101500	Hypnum@jg28062.t1		Entodon@jg7166.t1	Entodon@jg23157.t1	Sc_g09005	Sc_g06542		CepurR40.6G106500		CepurGG1@6G102800.1	Pp3c14_11040	Pp3c17_10600			14	scaffold-AWOI-2013326-Diphyscium_foliosum	cluster_0118	ABK1
abk1g00097	BA11G02740	BA06G07980	Poh0198940	Poh0296200	Poh0195280		Hypnum@jg28058.t1		Entodon@jg7168.t1	Entodon@jg23158.t1		Sc_g06541		CepurR40.6G106600		CepurGG1@6G102900.1	Pp3c14_11030				12	scaffold-AWOI-2008777-Diphyscium_foliosum	cluster_0119	ABK1
abk1g00101	BA11G02720	BA06G07960	Poh0198960	Poh0296220	Poh0195300	Poh0101490	Hypnum@jg28063.t1		Entodon@jg7165.t1		Sc_g09016		CepurR40.2G094800	CepurR40.6G106300	CepurGG1@2G077100.1	CepurGG1@6G102600.1	Pp3c14_11050	Pp3c17_10590			15	scaffold-AWOI-2072432-Diphyscium_foliosum	cluster_0120	ABK1
abk1g00102	BA11G02720	BA06G07960	Poh0198960	Poh0296220	Poh0195300	Poh0101490	Hypnum@jg28063.t1		Entodon@jg7165.t1		Sc_g09016		CepurR40.2G094800	CepurR40.6G106300	CepurGG1@2G077100.1	CepurGG1@6G102600.1	Pp3c14_11050	Pp3c17_10590			15	scaffold-AWOI-2072432-Diphyscium_foliosum	cluster_0121	ABK1
abk1g00103	BA11G02740	BA06G07980	Poh0198940	Poh0296200	Poh0195280		Hypnum@jg28058.t1		Entodon@jg7168.t1	Entodon@jg23158.t1		Sc_g06541					Pp3c14_11030				10	scaffold-AWOI-2008776-Diphyscium_foliosum	cluster_0122	ABK1
abk1g00104	BA11G02740	BA06G07980	Poh0198940	Poh0296200	Poh0195280		Hypnum@jg28058.t1		Entodon@jg7168.t1	Entodon@jg23158.t1		Sc_g06541		CepurR40.6G106600		CepurGG1@6G102900.1	Pp3c14_11030				12	scaffold-AWOI-2008776-Diphyscium_foliosum	cluster_0123	ABK1
abk1g00105	BA11G02740	BA06G07980	Poh0198940	Poh0296200	Poh0195280		Hypnum@jg28058.t1		Entodon@jg7168.t1	Entodon@jg23158.t1		Sc_g06541		CepurR40.6G106600		CepurGG1@6G102900.1	Pp3c14_11030				12	scaffold-AWOI-2008776-Diphyscium_foliosum	cluster_0124	ABK1
abk1g00106	BA11G02720	BA06G07960	Poh0198960	Poh0296220	Poh0195300	Poh0101490	Hypnum@jg28063.t1		Entodon@jg7165.t1		Sc_g09016		CepurR40.2G094800	CepurR40.6G106300	CepurGG1@2G077100.1	CepurGG1@6G102600.1	Pp3c14_11050	Pp3c17_10590			15	scaffold-AWOI-2072432-Diphyscium_foliosum	cluster_0125	ABK1
abk1g00107	BA11G02740	BA06G07980	Poh0198940	Poh0296200	Poh0195280		Hypnum@jg28058.t1		Entodon@jg7168.t1	Entodon@jg23158.t1		Sc_g06541		CepurR40.6G106600			Pp3c14_11030				11	scaffold-AWOI-2008776-Diphyscium_foliosum	cluster_0126	ABK1
abk1g00108	BA11G02730	BA06G07970	Poh0198950	Poh0296210	Poh0195290	Poh0101500	Hypnum@jg28062.t1		Entodon@jg7166.t1	Entodon@jg23157.t1	Sc_g09005	Sc_g06542		CepurR40.6G106500		CepurGG1@6G102800.1	Pp3c14_11040	Pp3c17_10600			15	scaffold-AWOI-2013326-Diphyscium_foliosum	cluster_0127	ABK1
abk1g00110	BA11G02770	BA06G07950	Poh0199000	Poh0296260	Poh0195310	Poh0101480		Hypnum@jg2032.t1	Entodon@jg7163.t1	Entodon@jg23139.t1	Sc_g09017				CepurGG1@2G076100.1		Pp3c14_11070	Pp3c17_10520			13	scaffold-AWOI-2009088-Diphyscium_foliosum	cluster_0128	ABK1
abk1g00111	BA11G02770	BA06G07950	Poh0199000	Poh0296260	Poh0195310	Poh0101480		Hypnum@jg2032.t1	Entodon@jg7163.t1	Entodon@jg23139.t1	Sc_g09017				CepurGG1@2G076100.1		Pp3c14_11070	Pp3c17_10520			13	scaffold-AWOI-2009088-Diphyscium_foliosum	cluster_0129	ABK1
abk1g00112	BA11G02730	BA06G07970	Poh0198950	Poh0296210	Poh0195290	Poh0101500	Hypnum@jg28062.t1		Entodon@jg7166.t1	Entodon@jg23157.t1	Sc_g09005	Sc_g06542		CepurR40.6G106500		CepurGG1@6G102800.1	Pp3c14_11040	Pp3c17_10600			15	scaffold-AWOI-2013326-Diphyscium_foliosum	cluster_0130	ABK1
abk1g00113	BA11G02730	BA06G07970	Poh0198950	Poh0296210	Poh0195290	Poh0101500	Hypnum@jg28062.t1		Entodon@jg7166.t1	Entodon@jg23157.t1	Sc_g09005	Sc_g06542		CepurR40.6G106500		CepurGG1@6G102800.1	Pp3c14_11040	Pp3c17_10600			15	scaffold-AWOI-2013326-Diphyscium_foliosum	cluster_0131	ABK1
abk1g00114	BA11G02730	BA06G07970	Poh0198950	Poh0296210	Poh0195290	Poh0101500	Hypnum@jg28062.t1		Entodon@jg7166.t1	Entodon@jg23157.t1	Sc_g09005	Sc_g06542		CepurR40.6G106500		CepurGG1@6G102800.1	Pp3c14_11040	Pp3c17_10600			15	scaffold-AWOI-2013326-Diphyscium_foliosum	cluster_0132	ABK1
abk1g00115		BA06G07950	Poh0199000	Poh0296260	Poh0195310	Poh0101480		Hypnum@jg2032.t1	Entodon@jg7163.t1	Entodon@jg23139.t1	Sc_g09017				CepurGG1@2G076100.1		Pp3c14_11070	Pp3c17_10520			12	scaffold-AWOI-2009088-Diphyscium_foliosum	cluster_0133	ABK1
abk1g00116	BA11G02730	BA06G07970	Poh0198950	Poh0296210	Poh0195290	Poh0101500	Hypnum@jg28062.t1		Entodon@jg7166.t1	Entodon@jg23157.t1	Sc_g09005	Sc_g06542		CepurR40.6G106500		CepurGG1@6G102800.1	Pp3c14_11040	Pp3c17_10600			15	scaffold-AWOI-2013326-Diphyscium_foliosum	cluster_0134	ABK1
abk1g00117	BA11G02720	BA06G07960	Poh0198960	Poh0296220	Poh0195300	Poh0101490	Hypnum@jg28063.t1		Entodon@jg7165.t1		Sc_g09016		CepurR40.2G094800	CepurR40.6G106300	CepurGG1@2G077100.1	CepurGG1@6G102600.1	Pp3c14_11050	Pp3c17_10590			15	scaffold-AWOI-2072432-Diphyscium_foliosum	cluster_0135	ABK1
abk1g00124	BA11G02720		Poh0198960	Poh0296220	Poh0195300	Poh0101490	Hypnum@jg28063.t1		Entodon@jg7165.t1		Sc_g09016		CepurR40.2G094800	CepurR40.6G106300	CepurGG1@2G077100.1	CepurGG1@6G102600.1	Pp3c14_11050	Pp3c17_10590			14	scaffold-AWOI-2072432-Diphyscium_foliosum	cluster_0136	ABK1
abk1g00125	BA11G02720		Poh0198960	Poh0296220	Poh0195300	Poh0101490	Hypnum@jg28063.t1		Entodon@jg7165.t1		Sc_g09016		CepurR40.2G094800	CepurR40.6G106300	CepurGG1@2G077100.1	CepurGG1@6G102600.1	Pp3c14_11050	Pp3c17_10590			14	scaffold-AWOI-2072432-Diphyscium_foliosum	cluster_0137	ABK1
abk1g00126	BA11G02720		Poh0198960	Poh0296220	Poh0195300	Poh0101490	Hypnum@jg28063.t1		Entodon@jg7165.t1		Sc_g09016		CepurR40.2G094800	CepurR40.6G106300	CepurGG1@2G077100.1	CepurGG1@6G102600.1	Pp3c14_11050	Pp3c17_10590			14	scaffold-AWOI-2072432-Diphyscium_foliosum	cluster_0138	ABK1
abk1g00127	BA11G02770		Poh0199000	Poh0296260	Poh0195310	Poh0101480		Hypnum@jg2032.t1	Entodon@jg7163.t1	Entodon@jg23139.t1	Sc_g09017		CepurR40.2G096500		CepurGG1@2G076100.1		Pp3c14_11070	Pp3c17_10520			13	scaffold-AWOI-2009088-Diphyscium_foliosum	cluster_0139	ABK1
abk1g00183	BA06G06040		Poh0199440	Poh0030850	Poh0104040		Hypnum@jg2140.t1	Hypnum@jg28285.t1	Entodon@jg23331.t1	Entodon@jg7401.t1		Sc_g06820	CepurR40.2G104700	CepurR40.6G086200	CepurGG1@2G067500.1	CepurGG1@6G081700.1	Pp3c14_11460	Pp3c17_7480			15	scaffold-HRWG-2068903-Buxbaumia_aphylla	cluster_0140	ABK1
abk1g00184	BA06G06030		Poh0199470	Poh0030810	Poh0104020		Hypnum@jg2147.t1	Hypnum@jg28284.t1	Entodon@jg23335.t1	Entodon@jg7397.t1	Sc_g09159		CepurR40.2G104500		CepurGG1@2G068000.1		Pp3c14_11450	Pp3c17_7510			13	scaffold-HRWG-2011596-Buxbaumia_aphylla	cluster_0141	ABK1
abk1g00185	BA06G06030		Poh0199470	Poh0030810	Poh0104020		Hypnum@jg2147.t1	Hypnum@jg28284.t1	Entodon@jg23335.t1	Entodon@jg7397.t1	Sc_g09159		CepurR40.2G104600		CepurGG1@2G068000.1		Pp3c14_11450	Pp3c17_7510			13	scaffold-HRWG-2011596-Buxbaumia_aphylla	cluster_0142	ABK1
abk1g00187	BA06G06030		Poh0199470	Poh0030810	Poh0104020		Hypnum@jg2147.t1	Hypnum@jg28284.t1	Entodon@jg23335.t1	Entodon@jg7397.t1	Sc_g09159		CepurR40.2G104500		CepurGG1@2G068000.1		Pp3c14_11450	Pp3c17_7510			13	scaffold-HRWG-2011596-Buxbaumia_aphylla	cluster_0143	ABK1
abk1g00188	BA06G06030		Poh0199470	Poh0030810	Poh0104020		Hypnum@jg2147.t1	Hypnum@jg28284.t1	Entodon@jg23335.t1	Entodon@jg7397.t1			CepurR40.2G104500		CepurGG1@2G068000.1		Pp3c14_11450	Pp3c17_7510			12	scaffold-HRWG-2011596-Buxbaumia_aphylla	cluster_0144	ABK1
abk1g00189	BA06G06030		Poh0199470	Poh0030810	Poh0104020		Hypnum@jg2147.t1	Hypnum@jg28284.t1	Entodon@jg23335.t1	Entodon@jg7397.t1			CepurR40.2G104500		CepurGG1@2G068000.1		Pp3c14_11450	Pp3c17_7510			12	scaffold-HRWG-2011596-Buxbaumia_aphylla	cluster_0145	ABK1
abk1g00190	BA06G06040		Poh0199440	Poh0030850	Poh0104040		Hypnum@jg2140.t1	Hypnum@jg28285.t1	Entodon@jg23331.t1	Entodon@jg7401.t1		Sc_g06820	CepurR40.2G104700	CepurR40.6G086200	CepurGG1@2G067500.1	CepurGG1@6G081700.1	Pp3c14_11460	Pp3c17_7480			15	scaffold-HRWG-2068903-Buxbaumia_aphylla	cluster_0146	ABK1
abk1g00192	BA06G06050	BA11G01590	Poh0199460	Poh0030820	Poh0104050		Hypnum@jg2146.t1	Hypnum@jg28288.t1	Entodon@jg23334.t1	Entodon@jg7404.t1		Sc_g06818			CepurGG1@2G067300.1		Pp3c14_11480	Pp3c17_7450			13	#N/A	cluster_0147	ABK1
abk1g00196	BA06G06050	BA11G01590	Poh0199460	Poh0030820	Poh0104050		Hypnum@jg2146.t1	Hypnum@jg28288.t1	Entodon@jg23334.t1	Entodon@jg7404.t1		Sc_g06818			CepurGG1@2G067300.1		Pp3c14_11480	Pp3c17_7450			13	#N/A	cluster_0148	ABK1
abk1g00203	BA06G06080	BA11G01550			Poh0104070		Hypnum@jg2129.t1	Hypnum@jg28291.t1	Entodon@jg23324.t1	Entodon@jg7407.t1	Sc_g09169	Sc_g06813	CepurR40.2G105100	CepurR40.6G085500	CepurGG1@2G066900.1	CepurGG1@6G080900.1		Pp3c17_7260			14	scaffold-HRWG-2068720-Buxbaumia_aphylla	cluster_0149	ABK1
abk1g00204	BA06G06080	BA11G01550			Poh0104070		Hypnum@jg2129.t1	Hypnum@jg28291.t1	Entodon@jg23324.t1	Entodon@jg7407.t1	Sc_g09169	Sc_g06813	CepurR40.2G105100	CepurR40.6G085500	CepurGG1@2G066900.1	CepurGG1@6G080900.1		Pp3c17_7260			14	scaffold-HRWG-2068720-Buxbaumia_aphylla	cluster_0150	ABK1
abk1g00205	BA06G06070	BA11G01540	Poh0199390	Poh0030910	Poh0104080		Hypnum@jg2128.t1		Entodon@jg23324.t1		Sc_g09168	Sc_g06812	CepurR40.2G105900	CepurR40.6G085400	CepurGG1@2G066700.1	CepurGG1@6G080700.1	Pp3c14_11570				14	scaffold-AWOI-2011316-Diphyscium_foliosum	cluster_0151	ABK1
abk1g00206	BA06G06070	BA11G01540	Poh0199390	Poh0030910	Poh0104080		Hypnum@jg2128.t1	Hypnum@jg28291.t1	Entodon@jg23324.t1	Entodon@jg7407.t1	Sc_g09168	Sc_g06812	CepurR40.2G105100	CepurR40.6G085400	CepurGG1@2G066900.1	CepurGG1@6G080700.1	Pp3c14_11570	Pp3c17_7260			17	scaffold-AWOI-2011316-Diphyscium_foliosum	cluster_0152	ABK1
abk1g00207	BA06G06070	BA11G01540	Poh0199390	Poh0030910	Poh0104080		Hypnum@jg2128.t1		Entodon@jg23324.t1		Sc_g09168	Sc_g06812	CepurR40.2G105900	CepurR40.6G085400	CepurGG1@2G066700.1	CepurGG1@6G080700.1	Pp3c14_11570				14	scaffold-AWOI-2011316-Diphyscium_foliosum	cluster_0153	ABK1
abk1g00208	BA06G06070	BA11G01540	Poh0199390	Poh0030910	Poh0104080		Hypnum@jg2128.t1		Entodon@jg23324.t1		Sc_g09168	Sc_g06812	CepurR40.2G105900	CepurR40.6G085400	CepurGG1@2G066700.1	CepurGG1@6G080700.1	Pp3c14_11570	Pp3c17_7270			15	scaffold-AWOI-2011316-Diphyscium_foliosum	cluster_0154	ABK1
abk1g00209		BA11G01560	Poh0199400	Poh0030900			Hypnum@jg2130.t1		Entodon@jg23325.t1		Sc_g09170	Sc_g06814	CepurR40.2G105000	CepurR40.6G085600	CepurGG1@2G067000.1	CepurGG1@6G081000.1	Pp3c14_11550	Pp3c17_7290			13	scaffold-HRWG-2003853-Buxbaumia_aphylla	cluster_0155	ABK1
abk1g00210		BA11G01560	Poh0199400	Poh0030900			Hypnum@jg2130.t1		Entodon@jg23325.t1		Sc_g09170	Sc_g06814	CepurR40.2G105000	CepurR40.6G085600	CepurGG1@2G067000.1	CepurGG1@6G081000.1	Pp3c14_11550	Pp3c17_7290			13	scaffold-HRWG-2003853-Buxbaumia_aphylla	cluster_0156	ABK1
abk1g00211	BA06G06070	BA11G01540	Poh0199390	Poh0030910	Poh0104080		Hypnum@jg2128.t1		Entodon@jg23324.t1		Sc_g09168	Sc_g06812	CepurR40.2G105900	CepurR40.6G085400	CepurGG1@2G066700.1	CepurGG1@6G080700.1	Pp3c14_11570	Pp3c17_7270			15	scaffold-AWOI-2011316-Diphyscium_foliosum	cluster_0157	ABK1
abk1g00212	BA06G06070	BA11G01540	Poh0199390	Poh0030910	Poh0104080		Hypnum@jg2128.t1		Entodon@jg23324.t1		Sc_g09168	Sc_g06812	CepurR40.2G105900	CepurR40.6G085400	CepurGG1@2G066700.1	CepurGG1@6G080700.1	Pp3c14_11570				14	scaffold-AWOI-2011316-Diphyscium_foliosum	cluster_0158	ABK1
abk1g00213	BA06G06070	BA11G01540	Poh0199390	Poh0030910			Hypnum@jg2128.t1		Entodon@jg23324.t1		Sc_g09168	Sc_g06812	CepurR40.2G105800	CepurR40.6G085400	CepurGG1@2G066700.1	CepurGG1@6G080700.1	Pp3c14_11570	Pp3c17_7270			14	scaffold-HRWG-2007056-Buxbaumia_aphylla	cluster_0159	ABK1
abk1g00221		BA11G01490	Poh0199340	Poh0030960			Hypnum@jg2123.t1		Entodon@jg23318.t1			Sc_g06805	CepurR40.2G107600		CepurGG1@2G065600.1		Pp3c14_11740	Pp3c17_7100			10	scaffold-AWOI-2072907-Diphyscium_foliosum	cluster_0160	ABK1
abk1g00236	BA06G07110		Poh0191590	Poh0105500			Hypnum@jg27547.t1		Entodon@jg6749.t1		Sc_g09794		CepurR40.6G185000	CepurR40.2G110500	CepurGG1@6G177900.1	CepurGG1@2G064300.1	Pp3c14_11860				11	scaffold-HRWG-2010089-Buxbaumia_aphylla	cluster_0161	ABK1
abk1g00239	BA06G07110		Poh0191590	Poh0105500			Hypnum@jg27547.t1		Entodon@jg6749.t1		Sc_g09794		CepurR40.6G185000	CepurR40.2G110500	CepurGG1@6G177900.1	CepurGG1@2G064300.1	Pp3c14_11860				11	scaffold-AWOI-2009123-Diphyscium_foliosum	cluster_0162	ABK1
abk1g00245			Poh0191590	Poh0105500			Hypnum@jg27547.t1		Entodon@jg6749.t1		Sc_g09794		CepurR40.6G185000	CepurR40.2G110500	CepurGG1@6G177900.1	CepurGG1@2G064300.1	Pp3c14_11860				10	scaffold-HRWG-2010089-Buxbaumia_aphylla	cluster_0163	ABK1
abk1g00255	BA06G07100	BA11G00940	Poh0191620	Poh0105470	Poh0202180	Poh0031960	Hypnum@jg27549.t1	Hypnum@jg1968.t1	Entodon@jg6750.t1	Entodon@jg23082.t1				CepurR40.2G110000		CepurGG1@2G064500.1	Pp3c14_11970	Pp3c1_25640			14	scaffold-AWOI-2073690-Diphyscium_foliosum	cluster_0164	ABK1
abk1g00258	BA06G07080		Poh0191600	Poh0105490			Hypnum@jg27555.t1		Entodon@jg6754.t1		Sc_g09796		CepurR40.6G184800		CepurGG1@6G177800.1		Pp3c14_11980	Pp3c1_25660			10	scaffold-AWOI-2073879-Diphyscium_foliosum	cluster_0165	ABK1
abk1g00259	BA06G07100	BA11G00940	Poh0191620	Poh0105470	Poh0202180	Poh0031960	Hypnum@jg27549.t1	Hypnum@jg1968.t1	Entodon@jg6750.t1	Entodon@jg23082.t1				CepurR40.2G110000		CepurGG1@2G064500.1	Pp3c14_11970	Pp3c1_25640			14	scaffold-AWOI-2073690-Diphyscium_foliosum	cluster_0166	ABK1
abk1g00263	BA06G07100	BA11G00940	Poh0191620	Poh0105470	Poh0202180	Poh0031960	Hypnum@jg27549.t1	Hypnum@jg1968.t1	Entodon@jg6750.t1	Entodon@jg23082.t1				CepurR40.2G110000		CepurGG1@2G064500.1	Pp3c14_11970	Pp3c1_25640			14	scaffold-AWOI-2073690-Diphyscium_foliosum	cluster_0167	ABK1
abk1g00264	BA06G07080		Poh0191600	Poh0105490			Hypnum@jg27555.t1		Entodon@jg6754.t1		Sc_g09796		CepurR40.6G184800		CepurGG1@6G177800.1		Pp3c14_11980	Pp3c1_25660			10	scaffold-AWOI-2073879-Diphyscium_foliosum	cluster_0168	ABK1
abk1g00290	BA06G04440		Poh0108100	Poh0367790	Poh0203540	Poh0033440	Hypnum@jg27389.t1		Entodon@jg6641.t1				CepurR40.6G135800		CepurGG1@6G130300.1		Pp3c14_12330	Pp3c17_19730			11	scaffold-AWOI-2073839-Diphyscium_foliosum	cluster_0169	ABK1
abk1g00297	BA06G04440		Poh0108100	Poh0367790	Poh0203540	Poh0033440	Hypnum@jg27389.t1		Entodon@jg6641.t1				CepurR40.6G135800		CepurGG1@6G130300.1		Pp3c14_12330	Pp3c17_19730			11	scaffold-AWOI-2073839-Diphyscium_foliosum	cluster_0170	ABK1
abk1g00312	BA06G04420		Poh0108080	Poh0367810	Poh0203590	Poh0033490	Hypnum@jg1484.t1						CepurR40.6G136100	CepurR40.2G147900	CepurGG1@6G130700.1	CepurGG1@2G127300.1	Pp3c14_12460	Pp3c17_19840			12	scaffold-AWOI-2006431-Diphyscium_foliosum	cluster_0171	ABK1
abk1g00316	BA06G04420		Poh0108080		Poh0203590	Poh0033490	Hypnum@jg1484.t1						CepurR40.6G136100	CepurR40.2G147900	CepurGG1@6G130700.1	CepurGG1@2G127300.1	Pp3c14_12460	Pp3c17_19840			11	scaffold-AWOI-2006431-Diphyscium_foliosum	cluster_0172	ABK1
abk1g00376			Poh0191400	Poh0105710	Poh0174380	Poh0035500	Hypnum@jg27513.t1		Entodon@jg6719.t1		Sc_g06254		CepurR40.2G127900		CepurGG1@2G110200.1		Pp3c14_13470				10	scaffold-HRWG-2016216-Buxbaumia_aphylla	cluster_0173	ABK1
abk1g00381	BA06G07210		Poh0191400	Poh0105710	Poh0174380	Poh0035500	Hypnum@jg27513.t1		Entodon@jg6719.t1		Sc_g06254		CepurR40.2G127900		CepurGG1@2G110200.1		Pp3c14_13470				11	scaffold-HRWG-2016216-Buxbaumia_aphylla	cluster_0174	ABK1
abk1g00384	BA06G07240		Poh0191500	Poh0105590	Poh0202060	Poh0031840	Hypnum@jg27517.t1	Hypnum@jg1943.t1		Entodon@jg23057.t1					CepurGG1@6G138600.1		Pp3c14_13560				10	scaffold-AWOI-2009939-Diphyscium_foliosum	cluster_0175	ABK1
abk1g00385	BA06G07240		Poh0191500	Poh0105590	Poh0202060	Poh0031840	Hypnum@jg27517.t1	Hypnum@jg1943.t1		Entodon@jg23057.t1					CepurGG1@6G138600.1		Pp3c14_13560				10	scaffold-AWOI-2009939-Diphyscium_foliosum	cluster_0176	ABK1
abk1g00387	BA06G07240		Poh0191500	Poh0105590	Poh0202060	Poh0031840	Hypnum@jg27517.t1	Hypnum@jg1943.t1		Entodon@jg23057.t1					CepurGG1@6G138600.1		Pp3c14_13560				10	scaffold-AWOI-2009939-Diphyscium_foliosum	cluster_0177	ABK1
abk1g00388	BA06G07240		Poh0191500	Poh0105590	Poh0202060	Poh0031840	Hypnum@jg27517.t1	Hypnum@jg1943.t1		Entodon@jg23057.t1					CepurGG1@6G138600.1		Pp3c14_13560				10	scaffold-AWOI-2009939-Diphyscium_foliosum	cluster_0178	ABK1
abk1g00389	BA06G07260		Poh0191490	Poh0105600	Poh0202120	Poh0031890	Hypnum@jg27518.t1	Hypnum@jg1946.t1	Entodon@jg6723.t1	Entodon@jg23063.t1					CepurGG1@6G136700.1		Pp3c14_13580	Pp3c17_4670			12	#N/A	cluster_0179	ABK1
abk1g00436		BA06G06300	Poh0202630	Poh0032490			Hypnum@jg1747.t1		Entodon@jg22895.t1				CepurR40.2G055900	CepurR40.6G117500	CepurGG1@2G054900.1	CepurGG1@6G112600.1	Pp3c14_14180	Pp3c1_31940			11	scaffold-AWOI-2073341-Diphyscium_foliosum	cluster_0180	ABK1
abk1g00437			Poh0202640	Poh0032500			Hypnum@jg1748.t1		Entodon@jg22894.t1				CepurR40.2G056000	CepurR40.6G117700	CepurGG1@2G055000.1	CepurGG1@6G112700.1	Pp3c14_14170	Pp3c1_31930			10	scaffold-HRWG-2006492-Buxbaumia_aphylla	cluster_0181	ABK1
abk1g00441			Poh0202570	Poh0032440			Hypnum@jg1740.t1		Entodon@jg22904.t1				CepurR40.2G054900	CepurR40.6G117200	CepurGG1@2G054100.1	CepurGG1@6G112300.1	Pp3c14_14240	Pp3c1_32040			10	scaffold-AWOI-2072022-Diphyscium_foliosum	cluster_0182	ABK1
abk1g00449	BA11G01190		Poh0200130	Poh0030280			Hypnum@jg2350.t1		Entodon@jg23229.t1		Sc_g06702		CepurR40.2G086500		CepurGG1@2G084700.1		Pp3c14_14380		Pp3c17_6430		10	scaffold-AWOI-2013645-Diphyscium_foliosum	cluster_0183	ABK1
abk1g00488	BA11G00090		Poh0203240	Poh0033120			Hypnum@jg28026.t1	Hypnum@jg1848.t1	Entodon@jg22984.t1	Entodon@jg7197.t1			CepurR40.2G173900				Pp3c14_14900	Pp3c17_5920			10	scaffold-AWOI-2066408-Diphyscium_foliosum	cluster_0184	ABK1
abk1g00521		BA06G08910	Poh0195170	Poh0199960	Poh0101630		Hypnum@jg28044.t1			Entodon@jg7181.t1			CepurR40.2G088500		CepurGG1@2G083300.1		Pp3c14_15210	Pp3c17_6070			10	#N/A	cluster_0185	ABK1
abk1g00524		BA06G08910	Poh0195170	Poh0199960	Poh0101630		Hypnum@jg28044.t1			Entodon@jg7181.t1			CepurR40.2G088500		CepurGG1@2G083300.1		Pp3c14_15210	Pp3c17_6070			10	#N/A	cluster_0186	ABK1
abk1g00562	BA11G02460		Poh0296410				Hypnum@jg28115.t1		Entodon@jg23179.t1	Entodon@jg7254.t1			CepurR40.2G081000		CepurGG1@2G088800.1	CepurGG1@6G107900.1	Pp3c14_15740	Pp3c17_17040			10	scaffold-AWOI-2072287-Diphyscium_foliosum	cluster_0187	ABK1
abk1g00598	BA06G11080		Poh0174870	Poh0036020	Poh0099300	Poh0196510	Hypnum@jg1245.t1		Entodon@jg22400.t1		Sc_g05930	Sc_g08582	CepurR40.6G029200		CepurGG1@6G026300.1		Pp3c14_16140	Pp3c2_4310			13	scaffold-AWOI-2003342-Diphyscium_foliosum	cluster_0188	ABK1
abk1g00600	BA06G11080		Poh0174870	Poh0036020	Poh0099300	Poh0196510	Hypnum@jg1245.t1		Entodon@jg22400.t1		Sc_g05930	Sc_g08582	CepurR40.6G029200		CepurGG1@6G026300.1		Pp3c14_16140	Pp3c2_4310			13	scaffold-AWOI-2003342-Diphyscium_foliosum	cluster_0189	ABK1
abk1g00608	BA06G11100		Poh0174900	Poh0036060	Poh0099280	Poh0196460	Hypnum@jg1241.t1	Hypnum@jg28579.t1	Entodon@jg22395.t1	Entodon@jg7607.t1	Sc_g05931	Sc_g08581	CepurR40.6G028900	CepurR40.2G246800	CepurGG1@6G026000.1	CepurGG1@2G201100.1	Pp3c14_16170	Pp3c2_4390			17	scaffold-AWOI-2072869-Diphyscium_foliosum	cluster_0190	ABK1
abk1g00609	BA06G11100		Poh0174900	Poh0036060	Poh0099280	Poh0196460	Hypnum@jg1241.t1	Hypnum@jg28579.t1	Entodon@jg22395.t1	Entodon@jg7607.t1	Sc_g05931	Sc_g08581	CepurR40.6G028900	CepurR40.2G246800	CepurGG1@6G026000.1	CepurGG1@2G201100.1	Pp3c14_16170	Pp3c2_4390			17	scaffold-AWOI-2072869-Diphyscium_foliosum	cluster_0191	ABK1
abk1g00612	BA06G11100		Poh0174900	Poh0036060	Poh0099280	Poh0196460	Hypnum@jg1241.t1	Hypnum@jg28579.t1	Entodon@jg22395.t1	Entodon@jg7607.t1	Sc_g05931	Sc_g08581	CepurR40.6G028900	CepurR40.2G246800	CepurGG1@6G026000.1	CepurGG1@2G201100.1	Pp3c14_16170	Pp3c2_4390			17	scaffold-AWOI-2072869-Diphyscium_foliosum	cluster_0192	ABK1
abk1g00613	BA06G11080		Poh0174870	Poh0036020	Poh0099300		Hypnum@jg1245.t1	Hypnum@jg28576.t1	Entodon@jg22400.t1	Entodon@jg7608.t1	Sc_g05930	Sc_g08582	CepurR40.6G029200	CepurR40.2G246700	CepurGG1@6G026300.1	CepurGG1@2G201000.1	Pp3c14_16140	Pp3c2_4310			16	scaffold-AWOI-2003342-Diphyscium_foliosum	cluster_0193	ABK1
abk1g00620	BA06G11080		Poh0174870	Poh0036020	Poh0099300	Poh0196510		Hypnum@jg28577.t1	Entodon@jg22400.t1	Entodon@jg7608.t1	Sc_g05930	Sc_g08582	CepurR40.6G029200	CepurR40.2G246700	CepurGG1@6G026300.1	CepurGG1@2G201000.1	Pp3c14_16140	Pp3c2_4310			16	#N/A	cluster_0194	ABK1
abk1g00621	BA06G11080		Poh0174870	Poh0036020	Poh0099300	Poh0196510		Hypnum@jg28576.t1	Entodon@jg22400.t1	Entodon@jg7608.t1	Sc_g05930	Sc_g08582	CepurR40.6G029200	CepurR40.2G246700	CepurGG1@6G026300.1	CepurGG1@2G201000.1	Pp3c14_16140	Pp3c2_4310			16	scaffold-AWOI-2003342-Diphyscium_foliosum	cluster_0195	ABK1
abk1g00622	BA06G11080		Poh0174870	Poh0036020	Poh0099300	Poh0196510		Hypnum@jg28576.t1	Entodon@jg22400.t1	Entodon@jg7608.t1	Sc_g05930	Sc_g08582	CepurR40.6G029200	CepurR40.2G246700	CepurGG1@6G026300.1	CepurGG1@2G201000.1	Pp3c14_16140	Pp3c2_4310			16	scaffold-AWOI-2003342-Diphyscium_foliosum	cluster_0196	ABK1
abk1g00623	BA06G11080		Poh0174870	Poh0036020	Poh0099300	Poh0196510		Hypnum@jg28576.t1	Entodon@jg22400.t1	Entodon@jg7608.t1	Sc_g05930	Sc_g08582		CepurR40.2G246700		CepurGG1@2G201000.1	Pp3c14_16140				13	scaffold-AWOI-2003342-Diphyscium_foliosum	cluster_0197	ABK1
abk1g00624	BA06G11080		Poh0174870	Poh0036020	Poh0099300	Poh0196510		Hypnum@jg28576.t1	Entodon@jg22400.t1	Entodon@jg7608.t1	Sc_g05930	Sc_g08582		CepurR40.2G246700		CepurGG1@2G201000.1	Pp3c14_16140				13	scaffold-AWOI-2003342-Diphyscium_foliosum	cluster_0198	ABK1
abk1g00625	BA06G11100		Poh0174900	Poh0036060	Poh0099280	Poh0196460		Hypnum@jg28579.t1	Entodon@jg22395.t1	Entodon@jg7607.t1	Sc_g05931	Sc_g08581		CepurR40.2G246800		CepurGG1@2G201100.1	Pp3c14_16170	Pp3c2_4390			14	scaffold-AWOI-2072869-Diphyscium_foliosum	cluster_0199	ABK1
abk1g00628					Poh0099180	Poh0196380		Hypnum@jg28598.t1		Entodon@jg7592.t1	Sc_g05941		CepurR40.6G027400	CepurR40.2G248300	CepurGG1@6G024500.1	CepurGG1@2G202600.1	Pp3c14_16330				10	scaffold-AWOI-2072549-Diphyscium_foliosum	cluster_0200	ABK1
abk1g00629					Poh0099180	Poh0196380		Hypnum@jg28598.t1		Entodon@jg7592.t1	Sc_g05941		CepurR40.6G027400	CepurR40.2G248300	CepurGG1@6G024500.1	CepurGG1@2G202600.1	Pp3c14_16330				10	scaffold-AWOI-2072549-Diphyscium_foliosum	cluster_0201	ABK1
abk1g00630	BA06G11100		Poh0174900	Poh0036060	Poh0099280	Poh0196460	Hypnum@jg1241.t1	Hypnum@jg28579.t1	Entodon@jg22395.t1	Entodon@jg7607.t1	Sc_g05931	Sc_g08581		CepurR40.2G246800		CepurGG1@2G201100.1	Pp3c14_16170	Pp3c2_4390			15	scaffold-AWOI-2072869-Diphyscium_foliosum	cluster_0202	ABK1
abk1g00631			Poh0174950	Poh0036070	Poh0099170	Poh0196370	Hypnum@jg1232.t1	Hypnum@jg28597.t1		Entodon@jg7594.t1	Sc_g05940	Sc_g08586	CepurR40.6G027600	CepurR40.2G248200	CepurGG1@6G024700.1	CepurGG1@2G202500.1	Pp3c14_16280				14	scaffold-AWOI-2008201-Diphyscium_foliosum	cluster_0203	ABK1
abk1g00632			Poh0174950	Poh0036070	Poh0099170	Poh0196370	Hypnum@jg1232.t1	Hypnum@jg28597.t1		Entodon@jg7594.t1	Sc_g05940	Sc_g08586	CepurR40.6G027600	CepurR40.2G248200	CepurGG1@6G024700.1	CepurGG1@2G202500.1	Pp3c14_16280				14	scaffold-AWOI-2008201-Diphyscium_foliosum	cluster_0204	ABK1
abk1g00633			Poh0174950	Poh0036070	Poh0099170	Poh0196370	Hypnum@jg1232.t1	Hypnum@jg28597.t1		Entodon@jg7594.t1	Sc_g05940	Sc_g08586	CepurR40.6G027600	CepurR40.2G248200	CepurGG1@6G024700.1	CepurGG1@2G202500.1	Pp3c14_16280				14	scaffold-AWOI-2008201-Diphyscium_foliosum	cluster_0205	ABK1
abk1g00634					Poh0099180	Poh0196380		Hypnum@jg28598.t1		Entodon@jg7592.t1	Sc_g05941		CepurR40.6G027400	CepurR40.2G248300	CepurGG1@6G024500.1	CepurGG1@2G202600.1	Pp3c14_16330				10	scaffold-AWOI-2072549-Diphyscium_foliosum	cluster_0206	ABK1
abk1g00636			Poh0174950	Poh0036070	Poh0099170	Poh0196370	Hypnum@jg1232.t1	Hypnum@jg28597.t1		Entodon@jg7594.t1	Sc_g05940	Sc_g08586	CepurR40.6G027600	CepurR40.2G248200	CepurGG1@6G024700.1	CepurGG1@2G202500.1	Pp3c14_16280				14	scaffold-AWOI-2008201-Diphyscium_foliosum	cluster_0207	ABK1
abk1g00637					Poh0099180	Poh0196380		Hypnum@jg28598.t1		Entodon@jg7592.t1	Sc_g05941		CepurR40.6G027400	CepurR40.2G248300	CepurGG1@6G024500.1	CepurGG1@2G202600.1	Pp3c14_16330				10	scaffold-AWOI-2072549-Diphyscium_foliosum	cluster_0208	ABK1
abk1g00638					Poh0099180	Poh0196380		Hypnum@jg28598.t1		Entodon@jg7592.t1	Sc_g05941		CepurR40.6G027400	CepurR40.2G248300	CepurGG1@6G024500.1	CepurGG1@2G202600.1	Pp3c14_16330				10	scaffold-AWOI-2072549-Diphyscium_foliosum	cluster_0209	ABK1
abk1g00663			Poh0175060	Poh0036280	Poh0196300	Poh0099120	Hypnum@jg1208.t1		Entodon@jg22374.t1			Sc_g08597	CepurR40.6G026400	CepurR40.2G245900	CepurGG1@6G023500.1	CepurGG1@2G200400.1	Pp3c14_16940	Pp3c17_20310			13	scaffold-HRWG-2004956-Buxbaumia_aphylla	cluster_0210	ABK1
abk1g00667			Poh0175060	Poh0036280	Poh0196300	Poh0099120	Hypnum@jg1208.t1		Entodon@jg22374.t1			Sc_g08597	CepurR40.6G026400	CepurR40.2G245900	CepurGG1@6G023500.1	CepurGG1@2G200400.1	Pp3c14_16940	Pp3c17_20310			13	scaffold-HRWG-2004956-Buxbaumia_aphylla	cluster_0211	ABK1
abk1g00668			Poh0175030	Poh0036190	Poh0196330	Poh0099140	Hypnum@jg1211.t1		Entodon@jg22377.t1				CepurR40.6G026800	CepurR40.2G245500	CepurGG1@6G024000.1	CepurGG1@2G199900.1	Pp3c14_16980	Pp3c17_20330			12	scaffold-AWOI-2071558-Diphyscium_foliosum	cluster_0212	ABK1
abk1g00669			Poh0175030	Poh0036190	Poh0196330	Poh0099140	Hypnum@jg1211.t1		Entodon@jg22377.t1		Sc_g05964		CepurR40.6G026800	CepurR40.2G245500	CepurGG1@6G024000.1	CepurGG1@2G199900.1	Pp3c14_16980	Pp3c17_20330			13	scaffold-AWOI-2071558-Diphyscium_foliosum	cluster_0213	ABK1
abk1g00670			Poh0175060	Poh0036280	Poh0196300	Poh0099120	Hypnum@jg1208.t1		Entodon@jg22374.t1			Sc_g08597	CepurR40.6G026400	CepurR40.2G245900	CepurGG1@6G023500.1	CepurGG1@2G200400.1	Pp3c14_16940	Pp3c17_20310			13	scaffold-HRWG-2004956-Buxbaumia_aphylla	cluster_0214	ABK1
abk1g00672			Poh0175020	Poh0036180	Poh0196340	Poh0099150	Hypnum@jg1212.t1		Entodon@jg22379.t1		Sc_g05965	Sc_g08588	CepurR40.6G026900	CepurR40.2G245400	CepurGG1@6G024100.1	CepurGG1@2G199800.1	Pp3c14_16990				13	scaffold-AWOI-2004362-Diphyscium_foliosum	cluster_0215	ABK1
abk1g00674			Poh0175020	Poh0036180	Poh0196340	Poh0099150	Hypnum@jg1212.t1		Entodon@jg22379.t1		Sc_g05965	Sc_g08588	CepurR40.6G026900	CepurR40.2G245400	CepurGG1@6G024100.1	CepurGG1@2G199800.1	Pp3c14_16990	Pp3c17_19900			14	scaffold-AWOI-2004362-Diphyscium_foliosum	cluster_0216	ABK1
abk1g00675			Poh0175020	Poh0036180	Poh0196340	Poh0099150	Hypnum@jg1212.t1		Entodon@jg22379.t1		Sc_g05965	Sc_g08588	CepurR40.6G026900	CepurR40.2G245400	CepurGG1@6G024100.1	CepurGG1@2G199800.1	Pp3c14_16990	Pp3c17_19900			14	scaffold-AWOI-2004362-Diphyscium_foliosum	cluster_0217	ABK1
abk1g00677			Poh0175030	Poh0036190	Poh0196330	Poh0099140	Hypnum@jg1211.t1		Entodon@jg22377.t1		Sc_g05964		CepurR40.6G026800	CepurR40.2G245500	CepurGG1@6G024000.1	CepurGG1@2G199900.1	Pp3c14_16980	Pp3c17_20330			13	scaffold-AWOI-2071558-Diphyscium_foliosum	cluster_0218	ABK1
abk1g00678			Poh0175030	Poh0036190	Poh0196330	Poh0099140	Hypnum@jg1211.t1		Entodon@jg22377.t1		Sc_g05964		CepurR40.6G026800	CepurR40.2G245500	CepurGG1@6G024000.1	CepurGG1@2G199900.1	Pp3c14_16980	Pp3c17_20330			13	scaffold-AWOI-2071558-Diphyscium_foliosum	cluster_0219	ABK1
abk1g00679			Poh0175030	Poh0036190	Poh0196330	Poh0099140	Hypnum@jg1211.t1		Entodon@jg22377.t1		Sc_g05964		CepurR40.6G026800	CepurR40.2G245500	CepurGG1@6G024000.1	CepurGG1@2G199900.1	Pp3c14_16980	Pp3c17_20330			13	scaffold-AWOI-2071558-Diphyscium_foliosum	cluster_0220	ABK1
abk1g00680			Poh0175030	Poh0036190	Poh0196330	Poh0099140	Hypnum@jg1211.t1		Entodon@jg22377.t1		Sc_g05964		CepurR40.6G026800	CepurR40.2G245500	CepurGG1@6G024000.1	CepurGG1@2G199900.1	Pp3c14_16980	Pp3c17_20330			13	scaffold-AWOI-2071558-Diphyscium_foliosum	cluster_0221	ABK1
abk1g00681			Poh0175030	Poh0036190	Poh0196330	Poh0099140	Hypnum@jg1211.t1		Entodon@jg22377.t1		Sc_g05964		CepurR40.6G026800	CepurR40.2G245500	CepurGG1@6G024000.1	CepurGG1@2G199900.1	Pp3c14_16980	Pp3c17_20330			13	scaffold-AWOI-2071558-Diphyscium_foliosum	cluster_0222	ABK1
abk1g00682			Poh0175020	Poh0036180	Poh0196340	Poh0099150	Hypnum@jg1212.t1		Entodon@jg22379.t1		Sc_g05965	Sc_g08588	CepurR40.6G026900	CepurR40.2G245400	CepurGG1@6G024100.1	CepurGG1@2G199800.1	Pp3c14_16990	Pp3c17_19900			14	scaffold-AWOI-2004362-Diphyscium_foliosum	cluster_0223	ABK1
abk1g00684			Poh0175000	Poh0036160	Poh0196360	Poh0099160	Hypnum@jg1215.t1		Entodon@jg22382.t1		Sc_g05969	Sc_g08587	CepurR40.6G027300	CepurR40.2G245000	CepurGG1@6G024400.1	CepurGG1@2G199400.1	Pp3c14_17020	Pp3c17_19970			14	scaffold-HRWG-2013987-Buxbaumia_aphylla	cluster_0224	ABK1
abk1g00692	BA06G06830		Poh0191800	Poh0105310	Poh0204750	Poh0034540	Hypnum@jg27571.t1		Entodon@jg6768.t1	Entodon@jg22769.t1	Sc_g09337	Sc_g06353	CepurR40.6G140700	CepurR40.2G183100	CepurGG1@6G135400.1	CepurGG1@2G159700.1	Pp3c14_17190				15	scaffold-AWOI-2014748-Diphyscium_foliosum	cluster_0225	ABK1
abk1g00699	BA06G06840		Poh0191810	Poh0105300	Poh0204730	Poh0034520	Hypnum@jg27572.t1		Entodon@jg6769.t1	Entodon@jg22768.t1			CepurR40.6G140600	CepurR40.2G183000	CepurGG1@6G135300.1	CepurGG1@2G159800.1	Pp3c14_17200	Pp3c10_16010			14	scaffold-AWOI-2072701-Diphyscium_foliosum	cluster_0226	ABK1
abk1g00700	BA06G06840		Poh0191810	Poh0105300	Poh0204730	Poh0034520	Hypnum@jg27572.t1		Entodon@jg6769.t1	Entodon@jg22768.t1			CepurR40.6G140600	CepurR40.2G183000	CepurGG1@6G135300.1	CepurGG1@2G159800.1	Pp3c14_17200	Pp3c10_16010			14	scaffold-AWOI-2072701-Diphyscium_foliosum	cluster_0227	ABK1
abk1g00701	BA06G06840		Poh0191810	Poh0105300	Poh0204730	Poh0034520	Hypnum@jg27572.t1		Entodon@jg6769.t1	Entodon@jg22768.t1			CepurR40.6G140600	CepurR40.2G183000	CepurGG1@6G135300.1	CepurGG1@2G159800.1	Pp3c14_17200	Pp3c10_16010			14	scaffold-AWOI-2072701-Diphyscium_foliosum	cluster_0228	ABK1
abk1g00704	BA06G06840		Poh0191810	Poh0105300	Poh0204730	Poh0034520	Hypnum@jg27572.t1		Entodon@jg6769.t1	Entodon@jg22768.t1			CepurR40.6G140600	CepurR40.2G183000	CepurGG1@6G135300.1	CepurGG1@2G159800.1	Pp3c14_17200	Pp3c10_16010			14	scaffold-AWOI-2072701-Diphyscium_foliosum	cluster_0229	ABK1
abk1g00705	BA06G06840		Poh0191810	Poh0105300	Poh0204730	Poh0034520	Hypnum@jg27572.t1		Entodon@jg6769.t1	Entodon@jg22768.t1	Sc_g09334		CepurR40.6G140600	CepurR40.2G183000	CepurGG1@6G135300.1	CepurGG1@2G159800.1	Pp3c14_17200	Pp3c10_16010			15	scaffold-AWOI-2072701-Diphyscium_foliosum	cluster_0230	ABK1
abk1g00706	BA06G06840		Poh0191810	Poh0105300	Poh0204730	Poh0034520	Hypnum@jg27572.t1		Entodon@jg6769.t1	Entodon@jg22768.t1	Sc_g09334		CepurR40.6G140600	CepurR40.2G183000	CepurGG1@6G135300.1	CepurGG1@2G159800.1	Pp3c14_17200	Pp3c10_16010			15	scaffold-AWOI-2072701-Diphyscium_foliosum	cluster_0231	ABK1
abk1g00709	BA06G06830		Poh0191800	Poh0105310	Poh0204750	Poh0034540	Hypnum@jg27571.t1		Entodon@jg6768.t1	Entodon@jg22769.t1	Sc_g09337	Sc_g06353	CepurR40.6G140700	CepurR40.2G183100	CepurGG1@6G135400.1	CepurGG1@2G159700.1	Pp3c14_17190	Pp3c10_16000			16	scaffold-AWOI-2014748-Diphyscium_foliosum	cluster_0232	ABK1
abk1g00710	BA06G06830		Poh0191800	Poh0105310	Poh0204750	Poh0034540	Hypnum@jg27571.t1		Entodon@jg6768.t1	Entodon@jg22769.t1	Sc_g09337	Sc_g06353	CepurR40.6G140700	CepurR40.2G183100	CepurGG1@6G135400.1	CepurGG1@2G159700.1	Pp3c14_17190	Pp3c10_16000			16	scaffold-AWOI-2014748-Diphyscium_foliosum	cluster_0233	ABK1
abk1g00711	BA06G06830		Poh0191800	Poh0105310	Poh0204750	Poh0034540	Hypnum@jg27571.t1		Entodon@jg6768.t1	Entodon@jg22769.t1	Sc_g09337	Sc_g06353	CepurR40.6G140700	CepurR40.2G183100	CepurGG1@6G135400.1	CepurGG1@2G159700.1	Pp3c14_17190	Pp3c10_16000			16	scaffold-AWOI-2014748-Diphyscium_foliosum	cluster_0234	ABK1
abk1g00712	BA06G06830		Poh0191800	Poh0105310	Poh0204750	Poh0034540	Hypnum@jg27571.t1		Entodon@jg6768.t1	Entodon@jg22769.t1	Sc_g09337	Sc_g06353	CepurR40.6G140700	CepurR40.2G183100	CepurGG1@6G135400.1	CepurGG1@2G159700.1	Pp3c14_17190	Pp3c10_16000			16	scaffold-AWOI-2014748-Diphyscium_foliosum	cluster_0235	ABK1
abk1g00713	BA06G06830		Poh0191800	Poh0105310	Poh0204750	Poh0034540	Hypnum@jg27571.t1		Entodon@jg6768.t1	Entodon@jg22769.t1	Sc_g09337	Sc_g06353	CepurR40.6G140700	CepurR40.2G183100	CepurGG1@6G135400.1	CepurGG1@2G159700.1	Pp3c14_17190	Pp3c10_16000			16	scaffold-AWOI-2014748-Diphyscium_foliosum	cluster_0236	ABK1
abk1g00714	BA06G06840		Poh0191810	Poh0105300	Poh0204730	Poh0034520	Hypnum@jg27572.t1		Entodon@jg6769.t1	Entodon@jg22768.t1	Sc_g09334		CepurR40.6G140600	CepurR40.2G183000	CepurGG1@6G135300.1	CepurGG1@2G159800.1	Pp3c14_17200	Pp3c10_16010			15	scaffold-AWOI-2072701-Diphyscium_foliosum	cluster_0237	ABK1
abk1g00716	BA06G06840		Poh0191810	Poh0105300	Poh0204730	Poh0034520	Hypnum@jg27572.t1		Entodon@jg6769.t1	Entodon@jg22768.t1	Sc_g09334		CepurR40.6G140600	CepurR40.2G183000	CepurGG1@6G135300.1	CepurGG1@2G159800.1	Pp3c14_17200	Pp3c10_16010			15	scaffold-AWOI-2072701-Diphyscium_foliosum	cluster_0238	ABK1
abk1g00727			Poh0191870	Poh0105220			Hypnum@jg27581.t1		Entodon@jg6781.t1	Entodon@jg22761.t1	Sc_g09324	Sc_g06345	CepurR40.6G139600	CepurR40.2G182100	CepurGG1@6G134100.1	CepurGG1@2G160200.1	Pp3c14_17300	Pp3c10_16350			13	scaffold-AWOI-2069445-Diphyscium_foliosum	cluster_0239	ABK1
abk1g00749			Poh0035820	Poh0174720	Poh0196560	Poh0099350	Hypnum@jg1274.t1	Hypnum@jg28558.t1	Entodon@jg22422.t1	Entodon@jg7616.t1	Sc_g08568	Sc_g06325	CepurR40.6G030000	CepurR40.2G065600	CepurGG1@6G027200.1	CepurGG1@2G100300.1	Pp3c14_17710	Pp3c2_4520			16	scaffold-AWOI-2012364-Diphyscium_foliosum	cluster_0240	ABK1
abk1g00750			Poh0035820	Poh0174720	Poh0196560	Poh0099350	Hypnum@jg1274.t1	Hypnum@jg28558.t1	Entodon@jg22422.t1	Entodon@jg7616.t1	Sc_g08568	Sc_g06325	CepurR40.6G030000	CepurR40.2G065600	CepurGG1@6G027200.1	CepurGG1@2G100300.1	Pp3c14_17710	Pp3c2_4520			16	scaffold-AWOI-2012364-Diphyscium_foliosum	cluster_0241	ABK1
abk1g00755			Poh0035890	Poh0174780	Poh0196550	Poh0099340		Hypnum@jg28559.t1	Entodon@jg22414.t1	Entodon@jg7615.t1	Sc_g08573		CepurR40.6G029800		CepurGG1@6G026900.1		Pp3c14_17730	Pp3c2_4480			12	scaffold-AWOI-2009682-Diphyscium_foliosum	cluster_0242	ABK1
abk1g00756			Poh0035890	Poh0174780	Poh0196550	Poh0099340	Hypnum@jg1263.t1	Hypnum@jg28559.t1	Entodon@jg22414.t1	Entodon@jg7615.t1	Sc_g08573		CepurR40.6G029800		CepurGG1@6G026900.1		Pp3c14_17730	Pp3c2_4480			13	scaffold-HRWG-2016808-Buxbaumia_aphylla	cluster_0243	ABK1
abk1g00757				Poh0174780	Poh0196550	Poh0099340	Hypnum@jg1263.t1	Hypnum@jg28559.t1	Entodon@jg22414.t1	Entodon@jg7615.t1	Sc_g08573		CepurR40.6G029800		CepurGG1@6G026900.1		Pp3c14_17730	Pp3c2_4480			12	scaffold-HRWG-2016808-Buxbaumia_aphylla	cluster_0244	ABK1
abk1g00758			Poh0035890	Poh0174780	Poh0196550	Poh0099340	Hypnum@jg1263.t1	Hypnum@jg28559.t1	Entodon@jg22414.t1	Entodon@jg7615.t1	Sc_g08573		CepurR40.6G029800		CepurGG1@6G026900.1		Pp3c14_17730	Pp3c2_4480			13	scaffold-HRWG-2016808-Buxbaumia_aphylla	cluster_0245	ABK1
abk1g00760			Poh0035820	Poh0174720	Poh0196560	Poh0099350	Hypnum@jg1274.t1	Hypnum@jg28558.t1	Entodon@jg22422.t1	Entodon@jg7616.t1	Sc_g08568	Sc_g06325	CepurR40.6G030000	CepurR40.2G065600	CepurGG1@6G027200.1	CepurGG1@2G100300.1	Pp3c14_17710	Pp3c2_4520			16	scaffold-AWOI-2012364-Diphyscium_foliosum	cluster_0246	ABK1
abk1g00767			Poh0035820		Poh0196560	Poh0099350		Hypnum@jg28558.t1		Entodon@jg7616.t1	Sc_g08568	Sc_g06325	CepurR40.6G030000		CepurGG1@6G027200.1		Pp3c14_17710	Pp3c2_4520			11	scaffold-AWOI-2012364-Diphyscium_foliosum	cluster_0247	ABK1
abk1g00768			Poh0035890	Poh0174780	Poh0196550	Poh0099340	Hypnum@jg1263.t1	Hypnum@jg28559.t1	Entodon@jg22414.t1	Entodon@jg7615.t1	Sc_g08573		CepurR40.6G029800		CepurGG1@6G026900.1		Pp3c14_17730	Pp3c2_4480			13	scaffold-AWOI-2009682-Diphyscium_foliosum	cluster_0248	ABK1
abk1g00772			Poh0035990	Poh0174840	Poh0196540	Poh0099330	Hypnum@jg1251.t1	Hypnum@jg28573.t1	Entodon@jg22408.t1	Entodon@jg7611.t1	Sc_g08575		CepurR40.6G029500		CepurGG1@6G026600.1		Pp3c14_17750	Pp3c2_4250			13	scaffold-HRWG-2068815-Buxbaumia_aphylla	cluster_0249	ABK1
abk1g00773			Poh0035990	Poh0174840	Poh0196540	Poh0099330	Hypnum@jg1251.t1	Hypnum@jg28573.t1	Entodon@jg22408.t1	Entodon@jg7611.t1	Sc_g08575		CepurR40.6G029500		CepurGG1@6G026600.1		Pp3c14_17750	Pp3c2_4250			13	scaffold-AWOI-2000384-Diphyscium_foliosum	cluster_0250	ABK1
abk1g00774			Poh0035890	Poh0174780	Poh0196550	Poh0099340	Hypnum@jg1263.t1	Hypnum@jg28559.t1	Entodon@jg22414.t1	Entodon@jg7615.t1	Sc_g08573		CepurR40.6G029800		CepurGG1@6G026900.1		Pp3c14_17730	Pp3c2_4480			13	scaffold-AWOI-2009682-Diphyscium_foliosum	cluster_0251	ABK1
abk1g00775			Poh0035890	Poh0174780	Poh0196550	Poh0099340	Hypnum@jg1263.t1	Hypnum@jg28559.t1	Entodon@jg22414.t1	Entodon@jg7615.t1	Sc_g08573		CepurR40.6G029800		CepurGG1@6G026900.1		Pp3c14_17730	Pp3c2_4480			13	scaffold-AWOI-2009682-Diphyscium_foliosum	cluster_0252	ABK1
abk1g00780			Poh0035990	Poh0174840	Poh0196540	Poh0099330		Hypnum@jg28573.t1	Entodon@jg22408.t1	Entodon@jg7611.t1	Sc_g08575		CepurR40.6G029500		CepurGG1@6G026600.1		Pp3c14_17750	Pp3c2_4250			12	scaffold-AWOI-2000384-Diphyscium_foliosum	cluster_0253	ABK1
abk1g00813	BA11G05080		Poh0197450		Poh0310010	Poh0098430		Hypnum@jg2500.t1		Entodon@jg23542.t1		Sc_g08927	CepurR40.2G026200	CepurR40.6G074900	CepurGG1@2G025500.1	CepurGG1@6G070200.1	Pp3c14_18640	Pp3c17_21330			13	scaffold-AWOI-2072019-Diphyscium_foliosum	cluster_0254	ABK1
abk1g00811	BA11G05080		Poh0197450		Poh0310010	Poh0098430		Hypnum@jg2500.t1		Entodon@jg23542.t1		Sc_g08927	CepurR40.2G026200	CepurR40.6G074900	CepurGG1@2G025500.1	CepurGG1@6G070200.1	Pp3c14_18640	Pp3c17_21330			13	scaffold-AWOI-2072019-Diphyscium_foliosum	cluster_0255	ABK1
abk1g00812	BA11G05080		Poh0197450	Poh0294520	Poh0310010	Poh0098430		Hypnum@jg2500.t1		Entodon@jg23542.t1		Sc_g08927	CepurR40.2G026200	CepurR40.6G074900	CepurGG1@2G025500.1	CepurGG1@6G070200.1	Pp3c14_18640	Pp3c17_21330			14	scaffold-AWOI-2072019-Diphyscium_foliosum	cluster_0256	ABK1
abk1g00815	BA11G04980		Poh0197550	Poh0294590			Hypnum@jg1419.t1		Entodon@jg22568.t1		Sc_g06777		CepurR40.2G027000		CepurGG1@2G026400.1		Pp3c14_18650	Pp3c17_21130			10	scaffold-AWOI-2073629-Diphyscium_foliosum	cluster_0257	ABK1
abk1g00819	BA11G04970	BA06G13820	Poh0197580	Poh0294620			Hypnum@jg1414.t1		Entodon@jg22560.t1		Sc_g06780	Sc_g08921	CepurR40.2G029500	CepurR40.6G074100	CepurGG1@2G028700.1	CepurGG1@6G069500.1					12	scaffold-HRWG-2070039-Buxbaumia_aphylla	cluster_0258	ABK1
abk1g00823	BA11G04960	BA06G13870	Poh0197610	Poh0294630	Poh0309980	Poh0098460	Hypnum@jg1415.t1		Entodon@jg22561.t1	Entodon@jg7977.t1	Sc_g06779	Sc_g08924	CepurR40.2G029600	CepurR40.6G074500	CepurGG1@2G028800.1	CepurGG1@6G069900.1	Pp3c14_18710				16	scaffold-AWOI-2070296-Diphyscium_foliosum	cluster_0259	ABK1
abk1g00825	BA11G04970	BA06G13820	Poh0197620	Poh0294700			Hypnum@jg1414.t1		Entodon@jg22560.t1		Sc_g06780	Sc_g08921	CepurR40.2G029500	CepurR40.6G074100	CepurGG1@2G028700.1	CepurGG1@6G069500.1					12	scaffold-HRWG-2070039-Buxbaumia_aphylla	cluster_0260	ABK1
abk1g00826	BA11G04960	BA06G13870	Poh0197610	Poh0294630	Poh0309980	Poh0098460	Hypnum@jg1415.t1		Entodon@jg22561.t1	Entodon@jg7977.t1	Sc_g06779	Sc_g08924	CepurR40.2G029600	CepurR40.6G074500	CepurGG1@2G028800.1	CepurGG1@6G069900.1	Pp3c14_18710				16	scaffold-AWOI-2070296-Diphyscium_foliosum	cluster_0261	ABK1
abk1g00827	BA11G05200		Poh0197640	Poh0294870			Hypnum@jg1409.t1		Entodon@jg22556.t1		Sc_g06791		CepurR40.2G029200		CepurGG1@2G028500.1		Pp3c14_18740	Pp3c17_21080			10	scaffold-AWOI-2009539-Diphyscium_foliosum	cluster_0262	ABK1
abk1g00830	BA11G04750	BA06G13770	Poh0197660	Poh0294900	Poh0310050	Poh0098400	Hypnum@jg1405.t1		Entodon@jg22553.t1		Sc_g06789	Sc_g08917	CepurR40.2G028000	CepurR40.6G073900	CepurGG1@2G027600.1	CepurGG1@6G069200.1	Pp3c14_18780				15	scaffold-HRWG-2069925-Buxbaumia_aphylla	cluster_0263	ABK1
abk1g00840	BA11G04750	BA06G13770	Poh0197660	Poh0294900	Poh0310050	Poh0098400	Hypnum@jg1405.t1		Entodon@jg22553.t1		Sc_g06789	Sc_g08917	CepurR40.2G028000	CepurR40.6G073900	CepurGG1@2G027600.1	CepurGG1@6G069200.1	Pp3c14_18810				15	scaffold-HRWG-2069925-Buxbaumia_aphylla	cluster_0264	ABK1
abk1g00841	BA11G04750	BA06G13770	Poh0197660	Poh0294900	Poh0310050	Poh0098400	Hypnum@jg1405.t1		Entodon@jg22553.t1		Sc_g06789	Sc_g08917	CepurR40.2G028000	CepurR40.6G073900	CepurGG1@2G027600.1	CepurGG1@6G069200.1	Pp3c14_18810				15	scaffold-HRWG-2069925-Buxbaumia_aphylla	cluster_0265	ABK1
abk1g00842	BA11G04750	BA06G13770	Poh0197660	Poh0294900	Poh0310050	Poh0098400	Hypnum@jg1405.t1		Entodon@jg22553.t1		Sc_g06789	Sc_g08917	CepurR40.2G028000	CepurR40.6G073900	CepurGG1@2G027600.1	CepurGG1@6G069200.1	Pp3c14_18810				15	scaffold-HRWG-2069925-Buxbaumia_aphylla	cluster_0266	ABK1
abk1g00844		BA06G13800	Poh0197690	Poh0294920			Hypnum@jg1401.t1		Entodon@jg22549.t1	Entodon@jg7964.t1	Sc_g06786		CepurR40.2G027600		CepurGG1@2G027200.1		Pp3c14_18850	Pp3c17_20760			11	scaffold-HRWG-2008194-Buxbaumia_aphylla	cluster_0267	ABK1
abk1g00872			Poh0174310	Poh0035410	Poh0197170	Poh0100090	Hypnum@jg1653.t1		Entodon@jg22800.t1	Entodon@jg7808.t1	Sc_g06235		CepurR40.2G129400	CepurR40.6G024200	CepurGG1@2G111800.1	CepurGG1@6G021500.1	Pp3c14_19170	Pp3c17_19052			14	scaffold-HRWG-2069653-Buxbaumia_aphylla	cluster_0268	ABK1
abk1g00873			Poh0174310	Poh0035410	Poh0197170	Poh0100090	Hypnum@jg1653.t1		Entodon@jg22800.t1	Entodon@jg7808.t1	Sc_g06235		CepurR40.2G129400	CepurR40.6G024200	CepurGG1@2G111800.1	CepurGG1@6G021500.1	Pp3c14_19170	Pp3c17_19050			14	scaffold-HRWG-2069653-Buxbaumia_aphylla	cluster_0269	ABK1
abk1g00878			Poh0174300	Poh0035400	Poh0197110	Poh0100080	Hypnum@jg1652.t1		Entodon@jg22802.t1	Entodon@jg7809.t1	Sc_g06236		CepurR40.2G129500	CepurR40.6G024000	CepurGG1@2G111900.1	CepurGG1@6G021300.1	Pp3c14_19190	Pp3c17_19060			14	scaffold-AWOI-2071212-Diphyscium_foliosum	cluster_0270	ABK1
abk1g00879			Poh0174300	Poh0035400	Poh0197110	Poh0100080	Hypnum@jg1652.t1		Entodon@jg22802.t1	Entodon@jg7809.t1	Sc_g06236		CepurR40.2G129500	CepurR40.6G024000	CepurGG1@2G111900.1	CepurGG1@6G021300.1	Pp3c14_19190	Pp3c17_19060			14	scaffold-AWOI-2071212-Diphyscium_foliosum	cluster_0271	ABK1
abk1g00880			Poh0174310	Poh0035410	Poh0197170	Poh0100090	Hypnum@jg1653.t1		Entodon@jg22800.t1	Entodon@jg7808.t1	Sc_g06235		CepurR40.2G129400	CepurR40.6G024200	CepurGG1@2G111800.1	CepurGG1@6G021500.1	Pp3c14_19170	Pp3c17_19050			14	scaffold-HRWG-2069653-Buxbaumia_aphylla	cluster_0272	ABK1
abk1g00881			Poh0174310	Poh0035410	Poh0197170	Poh0100090	Hypnum@jg1653.t1		Entodon@jg22800.t1	Entodon@jg7808.t1	Sc_g06235		CepurR40.2G129400	CepurR40.6G024200	CepurGG1@2G111800.1	CepurGG1@6G021500.1	Pp3c14_19170	Pp3c17_19050			14	scaffold-HRWG-2069653-Buxbaumia_aphylla	cluster_0273	ABK1
abk1g00882			Poh0174300	Poh0035400	Poh0197110	Poh0100080	Hypnum@jg1652.t1		Entodon@jg22802.t1	Entodon@jg7809.t1	Sc_g06236		CepurR40.2G129500	CepurR40.6G024000	CepurGG1@2G111900.1	CepurGG1@6G021300.1	Pp3c14_19190	Pp3c17_19060			14	scaffold-AWOI-2071212-Diphyscium_foliosum	cluster_0274	ABK1
abk1g00885			Poh0174300	Poh0035400	Poh0197110	Poh0100080	Hypnum@jg1652.t1		Entodon@jg22802.t1	Entodon@jg7809.t1	Sc_g06236		CepurR40.2G129500	CepurR40.6G024000	CepurGG1@2G111900.1	CepurGG1@6G021300.1	Pp3c14_19190	Pp3c17_19060			14	scaffold-AWOI-2071212-Diphyscium_foliosum	cluster_0275	ABK1
abk1g00921	BA11G00330		Poh0203350	Poh0033040	Poh0101850		Hypnum@jg1855.t1		Entodon@jg7221.t1				CepurR40.2G172800		CepurGG1@N009600.1		Pp3c14_19640	Pp3c17_15200	Pp3c1_28780	Pp3c2_10060	12	scaffold-AWOI-2001010-Diphyscium_foliosum	cluster_0276	ABK1
abk1g00923	BA11G00330		Poh0203350	Poh0033040	Poh0101850		Hypnum@jg1855.t1		Entodon@jg7221.t1				CepurR40.2G172800		CepurGG1@N009600.1		Pp3c14_19640	Pp3c17_15200	Pp3c1_28780	Pp3c2_10060	12	scaffold-AWOI-2001010-Diphyscium_foliosum	cluster_0277	ABK1
abk1g00925	BA11G00340		Poh0203360	Poh0033030	Poh0101960		Hypnum@jg1856.t1	Hypnum@jg27976.t1	Entodon@jg22992.t1	Entodon@jg7147.t1	Sc_g09055	Sc_g07021	CepurR40.2G172700	CepurR40.6G104600	CepurGG1@N009100.1	CepurGG1@6G100800.1	Pp3c14_19700	Pp3c17_15140	Pp3c1_28820	Pp3c2_10100	18	scaffold-AWOI-2071434-Diphyscium_foliosum	cluster_0278	ABK1
abk1g00926	BA11G00340		Poh0203360	Poh0033030	Poh0101960		Hypnum@jg1856.t1	Hypnum@jg27976.t1	Entodon@jg22992.t1	Entodon@jg7147.t1	Sc_g09055	Sc_g07021	CepurR40.2G172700	CepurR40.6G104600	CepurGG1@N009100.1	CepurGG1@6G100800.1	Pp3c14_19700	Pp3c17_15140	Pp3c1_28820	Pp3c2_10100	18	scaffold-AWOI-2071434-Diphyscium_foliosum	cluster_0279	ABK1
abk1g00929	BA11G00350		Poh0203370	Poh0033020	Poh0101980		Hypnum@jg1861.t1	Hypnum@jg27971.t1	Entodon@jg22994.t1	Entodon@jg7150.t1	Sc_g09050	Sc_g07018	CepurR40.2G172500	CepurR40.6G104400	CepurGG1@N009000.1	CepurGG1@6G100600.1	Pp3c14_19730	Pp3c17_15100	Pp3c1_28860	Pp3c2_10130	18	scaffold-AWOI-2071434-Diphyscium_foliosum	cluster_0280	ABK1
abk1g00931	BA11G00350		Poh0203370	Poh0033020	Poh0101980		Hypnum@jg1861.t1	Hypnum@jg27971.t1	Entodon@jg22994.t1	Entodon@jg7150.t1	Sc_g09050	Sc_g07018	CepurR40.2G172500	CepurR40.6G104400	CepurGG1@N009000.1	CepurGG1@6G100600.1	Pp3c14_19730	Pp3c17_15100	Pp3c1_28860	Pp3c2_10130	18	scaffold-AWOI-2071434-Diphyscium_foliosum	cluster_0281	ABK1
abk1g00932	BA11G00350		Poh0203370	Poh0033020	Poh0101980		Hypnum@jg1861.t1	Hypnum@jg27971.t1	Entodon@jg22994.t1	Entodon@jg7150.t1	Sc_g09050	Sc_g07018	CepurR40.2G172500	CepurR40.6G104400	CepurGG1@N009000.1	CepurGG1@6G100600.1	Pp3c14_19730	Pp3c17_15100	Pp3c1_28860	Pp3c2_10130	18	scaffold-AWOI-2071434-Diphyscium_foliosum	cluster_0282	ABK1
abk1g00933	BA11G00340		Poh0203360	Poh0033030	Poh0101960		Hypnum@jg1856.t1	Hypnum@jg27976.t1	Entodon@jg22992.t1	Entodon@jg7147.t1	Sc_g09055	Sc_g07021	CepurR40.2G172700	CepurR40.6G104600	CepurGG1@N009100.1	CepurGG1@6G100800.1	Pp3c14_19700	Pp3c17_15140	Pp3c1_28820	Pp3c2_10100	18	scaffold-AWOI-2071434-Diphyscium_foliosum	cluster_0283	ABK1
abk1g00937	BA11G00340		Poh0203360	Poh0033030	Poh0101960		Hypnum@jg1856.t1	Hypnum@jg27971.t1	Entodon@jg22992.t1	Entodon@jg7150.t1	Sc_g09055	Sc_g07021	CepurR40.2G172700	CepurR40.6G104600	CepurGG1@N009100.1	CepurGG1@6G100800.1	Pp3c14_19700	Pp3c17_15140	Pp3c1_28820	Pp3c2_10130	18	scaffold-AWOI-2071434-Diphyscium_foliosum	cluster_0284	ABK1
abk1g00938	BA11G00340		Poh0203360	Poh0033030	Poh0101960		Hypnum@jg1856.t1		Entodon@jg22992.t1		Sc_g09055	Sc_g07021	CepurR40.2G172700	CepurR40.6G104600	CepurGG1@N009100.1	CepurGG1@6G100800.1	Pp3c14_19700	Pp3c17_15140	Pp3c1_28820	Pp3c2_10100	16	scaffold-AWOI-2071434-Diphyscium_foliosum	cluster_0285	ABK1
abk1g00939	BA11G00340		Poh0203360	Poh0033030	Poh0101960		Hypnum@jg1856.t1		Entodon@jg22992.t1		Sc_g09055	Sc_g07021	CepurR40.2G172700	CepurR40.6G104600	CepurGG1@N009100.1	CepurGG1@6G100800.1	Pp3c14_19700	Pp3c17_15140	Pp3c1_28820	Pp3c2_10100	16	scaffold-AWOI-2071434-Diphyscium_foliosum	cluster_0286	ABK1
abk1g00940	BA11G00340		Poh0203360	Poh0033030	Poh0101960		Hypnum@jg1856.t1	Hypnum@jg27971.t1	Entodon@jg22992.t1		Sc_g09055	Sc_g07021	CepurR40.2G172700	CepurR40.6G104600	CepurGG1@N009100.1	CepurGG1@6G100800.1	Pp3c14_19700	Pp3c17_15140	Pp3c1_28820	Pp3c2_10100	17	scaffold-AWOI-2071434-Diphyscium_foliosum	cluster_0287	ABK1
abk1g00941	BA11G00340		Poh0203360	Poh0033030	Poh0101960		Hypnum@jg1856.t1		Entodon@jg22992.t1		Sc_g09055	Sc_g07021	CepurR40.2G172700	CepurR40.6G104600	CepurGG1@N009100.1	CepurGG1@6G100800.1	Pp3c14_19700	Pp3c17_15140	Pp3c1_28820	Pp3c2_10100	16	scaffold-AWOI-2071434-Diphyscium_foliosum	cluster_0288	ABK1
abk1g00942	BA11G00350		Poh0203370	Poh0033020	Poh0101980		Hypnum@jg1861.t1	Hypnum@jg27971.t1	Entodon@jg22994.t1	Entodon@jg7150.t1	Sc_g09050	Sc_g07018		CepurR40.6G104400	CepurGG1@N009000.1	CepurGG1@6G100600.1	Pp3c14_19730	Pp3c17_15100	Pp3c1_28860	Pp3c2_10130	17	scaffold-AWOI-2071434-Diphyscium_foliosum	cluster_0289	ABK1
abk1g00948	BA11G00410		Poh0203440	Poh0032910	Poh0101780		Hypnum@jg1889.t1	Hypnum@jg27969.t1	Entodon@jg23011.t1	Entodon@jg7154.t1	Sc_g09048			CepurR40.6G103900		CepurGG1@6G100100.1			Pp3c1_28990	Pp3c2_10210	13	scaffold-HRWG-2007078-Buxbaumia_aphylla	cluster_0290	ABK1
abk1g00949	BA11G00430		Poh0203420	Poh0032930	Poh0101770		Hypnum@jg1876.t1		Entodon@jg23007.t1			Sc_g07022	CepurR40.2G172100	CepurR40.6G104100	CepurGG1@N008800.1	CepurGG1@6G100300.1					11	scaffold-HRWG-2002380-Buxbaumia_aphylla	cluster_0291	ABK1
abk1g00973	BA11G00270		Poh0173990	Poh0034990			Hypnum@jg1364.t1		Entodon@jg22513.t1		Sc_g06910		CepurR40.2G044500		CepurGG1@2G043900.1		Pp3c14_20060	Pp3c17_18750			10	scaffold-HRWG-2069404-Buxbaumia_aphylla	cluster_0292	ABK1
abk1g00974	BA11G00270		Poh0173990	Poh0034990			Hypnum@jg1364.t1		Entodon@jg22513.t1		Sc_g06910		CepurR40.2G044500		CepurGG1@2G043900.1		Pp3c14_20060	Pp3c17_18750			10	scaffold-AWOI-2069773-Diphyscium_foliosum	cluster_0293	ABK1
abk1g00975	BA11G00270		Poh0173990	Poh0034990			Hypnum@jg1364.t1		Entodon@jg22513.t1		Sc_g06910		CepurR40.2G044500		CepurGG1@2G043900.1		Pp3c14_20060	Pp3c17_18750			10	scaffold-HRWG-2069404-Buxbaumia_aphylla	cluster_0294	ABK1
abk1g00976	BA11G00270		Poh0173990	Poh0034990			Hypnum@jg1364.t1		Entodon@jg22513.t1		Sc_g06910		CepurR40.2G044500		CepurGG1@2G043900.1		Pp3c14_20060	Pp3c17_18750			10	scaffold-HRWG-2069404-Buxbaumia_aphylla	cluster_0295	ABK1
abk1g00994			Poh0173820	Poh0035130	Poh0102190		Hypnum@jg1343.t1		Entodon@jg22484.t1		Sc_g06919	Sc_g09210	CepurR40.2G042900	CepurR40.6G096000	CepurGG1@2G042300.1	CepurGG1@6G092300.1	Pp3c14_20150	Pp3c17_18650			13	scaffold-AWOI-2071823-Diphyscium_foliosum	cluster_0296	ABK1
abk1g00997			Poh0173820	Poh0035130	Poh0102190		Hypnum@jg1343.t1		Entodon@jg22484.t1		Sc_g06919	Sc_g09210	CepurR40.2G042900	CepurR40.6G096000	CepurGG1@2G042300.1	CepurGG1@6G092300.1	Pp3c14_20150	Pp3c17_18650			13	scaffold-AWOI-2071823-Diphyscium_foliosum	cluster_0297	ABK1
abk1g01004			Poh0173960	Poh0035020	Poh0102120		Hypnum@jg1359.t1		Entodon@jg22508.t1			Sc_g09188		CepurR40.6G097400		CepurGG1@6G093900.1	Pp3c14_20240	Pp3c17_18630	Pp3c1_29160		11	scaffold-AWOI-2014408-Diphyscium_foliosum	cluster_0298	ABK1
abk1g01005			Poh0173960	Poh0035020	Poh0102120		Hypnum@jg1359.t1		Entodon@jg22508.t1			Sc_g09188		CepurR40.6G097400		CepurGG1@6G093900.1	Pp3c14_20240	Pp3c17_18630	Pp3c1_29160		11	scaffold-AWOI-2014408-Diphyscium_foliosum	cluster_0299	ABK1
abk1g01006			Poh0173960	Poh0035020	Poh0102120		Hypnum@jg1359.t1		Entodon@jg22508.t1			Sc_g09190		CepurR40.6G097400		CepurGG1@6G094200.1	Pp3c14_20240	Pp3c17_18630	Pp3c1_29160		11	scaffold-AWOI-2014408-Diphyscium_foliosum	cluster_0300	ABK1
abk1g01007			Poh0173960	Poh0035020	Poh0102120		Hypnum@jg1359.t1		Entodon@jg22508.t1			Sc_g09188		CepurR40.6G097400		CepurGG1@6G093900.1	Pp3c14_20240	Pp3c17_18630	Pp3c1_29160		11	scaffold-AWOI-2014408-Diphyscium_foliosum	cluster_0301	ABK1
abk1g01011			Poh0173960	Poh0035020	Poh0102120		Hypnum@jg1359.t1		Entodon@jg22508.t1			Sc_g09188		CepurR40.6G097900		CepurGG1@6G094200.1	Pp3c14_20240	Pp3c17_18630	Pp3c1_29160		11	scaffold-AWOI-2014408-Diphyscium_foliosum	cluster_0302	ABK1
abk1g01015			Poh0173860	Poh0035080	Poh0102140		Hypnum@jg1350.t1		Entodon@jg22496.t1		Sc_g06914	Sc_g09202	CepurR40.2G043500	CepurR40.6G096800	CepurGG1@2G042900.1	CepurGG1@6G093300.1	Pp3c14_20320		Pp3c1_29260		13	scaffold-AWOI-2070225-Diphyscium_foliosum	cluster_0303	ABK1
abk1g01016			Poh0173860	Poh0035080	Poh0102140		Hypnum@jg1350.t1		Entodon@jg22496.t1			Sc_g09202	CepurR40.2G043500	CepurR40.6G096800	CepurGG1@2G042900.1	CepurGG1@6G093300.1	Pp3c14_20320		Pp3c1_29260		12	scaffold-AWOI-2070225-Diphyscium_foliosum	cluster_0304	ABK1
abk1g01017			Poh0173860	Poh0035080	Poh0102140		Hypnum@jg1350.t1		Entodon@jg22496.t1		Sc_g06914	Sc_g09202	CepurR40.2G043500	CepurR40.6G096800	CepurGG1@2G042900.1	CepurGG1@6G093300.1	Pp3c14_20320	Pp3c17_18410	Pp3c1_29260		14	scaffold-AWOI-2070225-Diphyscium_foliosum	cluster_0305	ABK1
abk1g01018			Poh0173860	Poh0035080	Poh0102140		Hypnum@jg1350.t1		Entodon@jg22496.t1		Sc_g06914	Sc_g09202	CepurR40.2G043500	CepurR40.6G096800	CepurGG1@2G042900.1	CepurGG1@6G093300.1	Pp3c14_20320	Pp3c17_18410	Pp3c1_29260		14	scaffold-HRWG-2004704-Buxbaumia_aphylla	cluster_0306	ABK1
abk1g01024			Poh0173860	Poh0035080	Poh0102140		Hypnum@jg1350.t1		Entodon@jg22496.t1		Sc_g06914	Sc_g09202	CepurR40.2G043500	CepurR40.6G096800	CepurGG1@2G042900.1	CepurGG1@6G093300.1	Pp3c14_20320	Pp3c17_18410	Pp3c1_29260		14	scaffold-AWOI-2070225-Diphyscium_foliosum	cluster_0307	ABK1
abk1g01026			Poh0173860	Poh0035080	Poh0102140		Hypnum@jg1350.t1		Entodon@jg22496.t1		Sc_g06914	Sc_g09202	CepurR40.2G043500	CepurR40.6G096800	CepurGG1@2G042900.1	CepurGG1@6G093300.1	Pp3c14_20320	Pp3c17_18410	Pp3c1_29260		14	scaffold-AWOI-2070225-Diphyscium_foliosum	cluster_0308	ABK1
abk1g01027			Poh0173860	Poh0035080	Poh0102140		Hypnum@jg1350.t1		Entodon@jg22496.t1		Sc_g06914	Sc_g09202	CepurR40.2G043500	CepurR40.6G096800	CepurGG1@2G042900.1	CepurGG1@6G093300.1	Pp3c14_20320	Pp3c17_18410	Pp3c1_29260		14	scaffold-AWOI-2070225-Diphyscium_foliosum	cluster_0309	ABK1
abk1g01038			Poh0173700	Poh0034750			Hypnum@jg1327.t1		Entodon@jg22472.t1		Sc_g06924	Sc_g09196	CepurR40.2G042200		CepurGG1@2G041500.1		Pp3c14_20400		Pp3c1_29460		10	scaffold-AWOI-2010104-Diphyscium_foliosum	cluster_0310	ABK1
abk1g01039			Poh0173700	Poh0034750			Hypnum@jg1327.t1		Entodon@jg22472.t1		Sc_g06924	Sc_g09196	CepurR40.2G042200		CepurGG1@2G041500.1		Pp3c14_20400		Pp3c1_29460		10	scaffold-AWOI-2010104-Diphyscium_foliosum	cluster_0311	ABK1
abk1g01040			Poh0173700	Poh0034750			Hypnum@jg1327.t1		Entodon@jg22472.t1		Sc_g06924	Sc_g09196	CepurR40.2G042200		CepurGG1@2G041500.1		Pp3c14_20400		Pp3c1_29460		10	scaffold-AWOI-2010104-Diphyscium_foliosum	cluster_0312	ABK1
abk1g01047			Poh0173700	Poh0034750			Hypnum@jg1327.t1		Entodon@jg22472.t1		Sc_g06924	Sc_g09196	CepurR40.2G042200		CepurGG1@2G041500.1		Pp3c14_20400		Pp3c1_29460		10	scaffold-AWOI-2010104-Diphyscium_foliosum	cluster_0313	ABK1
abk1g01087			Poh0032300	Poh0202480			Hypnum@jg1766.t1		Entodon@jg22881.t1		Sc_g09035		CepurR40.6G101900	CepurR40.2G112900	CepurGG1@2G057400.1	CepurGG1@6G098300.1	Pp3c14_20840				10	scaffold-AWOI-2067833-Diphyscium_foliosum	cluster_0314	ABK1
abk1g01088			Poh0032300	Poh0202480			Hypnum@jg1766.t1		Entodon@jg22881.t1		Sc_g09035		CepurR40.6G101900	CepurR40.2G112900	CepurGG1@2G057400.1	CepurGG1@6G098300.1	Pp3c14_20840				10	scaffold-HRWG-2008121-Buxbaumia_aphylla	cluster_0315	ABK1
abk1g01089			Poh0032300	Poh0202480			Hypnum@jg1766.t1		Entodon@jg22881.t1		Sc_g09035		CepurR40.6G101900	CepurR40.2G112900	CepurGG1@2G057400.1	CepurGG1@6G098300.1	Pp3c14_20840				10	scaffold-HRWG-2008121-Buxbaumia_aphylla	cluster_0316	ABK1
abk1g01138	BA06G10670	BA11G01940	Poh0200920	Poh0296850	Poh0194580	Poh0102320	Hypnum@jg28494.t1	Hypnum@jg2190.t1	Entodon@jg7729.t1	Entodon@jg23374.t1			CepurR40.6G037900		CepurGG1@6G034700.1		Pp3c14_21620	Pp3c17_18190	Pp3c2_4940		15	scaffold-AWOI-2072369-Diphyscium_foliosum	cluster_0317	ABK1
abk1g01141	BA06G10670	BA11G01940	Poh0200920	Poh0296850	Poh0194580	Poh0102320	Hypnum@jg28494.t1	Hypnum@jg2190.t1	Entodon@jg7729.t1	Entodon@jg23374.t1			CepurR40.6G037700		CepurGG1@6G034300.1		Pp3c14_21620	Pp3c17_18190	Pp3c2_4940		15	scaffold-AWOI-2072369-Diphyscium_foliosum	cluster_0318	ABK1
abk1g01145	BA06G10670	BA11G01940	Poh0200920	Poh0296850	Poh0194580	Poh0102320	Hypnum@jg28494.t1	Hypnum@jg2190.t1	Entodon@jg7729.t1	Entodon@jg23374.t1			CepurR40.6G037900		CepurGG1@6G034700.1		Pp3c14_21680	Pp3c17_18130	Pp3c2_4940		15	scaffold-AWOI-2072369-Diphyscium_foliosum	cluster_0319	ABK1
abk1g01149	BA06G10660	BA11G01950	Poh0200910	Poh0296840	Poh0194550	Poh0102330	Hypnum@jg28489.t1	Hypnum@jg2192.t1	Entodon@jg7725.t1	Entodon@jg23375.t1	Sc_g08707		CepurR40.6G037400		CepurGG1@6G034000.1		Pp3c14_21720	Pp3c17_18100			15	scaffold-AWOI-2000711-Diphyscium_foliosum	cluster_0320	ABK1
abk1g01153		BA11G01990	Poh0200880	Poh0296820				Hypnum@jg2197.t1		Entodon@jg23378.t1	Sc_g08705		CepurR40.6G037100		CepurGG1@6G033700.1		Pp3c14_21860	Pp3c17_18010			10	scaffold-AWOI-2068804-Diphyscium_foliosum	cluster_0321	ABK1
abk1g01155		BA11G01990	Poh0200880	Poh0296820				Hypnum@jg2197.t1		Entodon@jg23378.t1	Sc_g08705		CepurR40.6G037100		CepurGG1@6G033700.1		Pp3c14_21860	Pp3c17_18010			10	scaffold-AWOI-2068804-Diphyscium_foliosum	cluster_0322	ABK1
abk1g01162	BA06G12040		Poh0194320	Poh0102570			Hypnum@jg28439.t1		Entodon@jg7683.t1		Sc_g08687		CepurR40.6G041300		CepurGG1@6G038500.1		Pp3c14_22020	Pp3c2_3170			10	scaffold-HRWG-2069551-Buxbaumia_aphylla	cluster_0323	ABK1
abk1g01169	BA06G12090		Poh0194290	Poh0102550			Hypnum@jg28436.t1		Entodon@jg7678.t1		Sc_g08683		CepurR40.6G041700		CepurGG1@6G038900.1		Pp3c14_22080	Pp3c2_3200			10	scaffold-AWOI-2013544-Diphyscium_foliosum	cluster_0324	ABK1
abk1g01173	BA06G12090		Poh0194290	Poh0102550			Hypnum@jg28436.t1		Entodon@jg7678.t1		Sc_g08683		CepurR40.6G041700		CepurGG1@6G038900.1		Pp3c14_22080	Pp3c2_3200			10	scaffold-AWOI-2013544-Diphyscium_foliosum	cluster_0325	ABK1
abk1g01193	BA06G11690				Poh0296620			Hypnum@jg2205.t1		Entodon@jg23386.t1		Sc_g05919	CepurR40.6G038900	CepurR40.2G161400	CepurGG1@6G035700.1	CepurGG1@2G120400.1	Pp3c14_22330	Pp3c1_36560			11	scaffold-HRWG-2070243-Buxbaumia_aphylla	cluster_0326	ABK1
abk1g01194	BA06G11690				Poh0296620			Hypnum@jg2205.t1		Entodon@jg23386.t1		Sc_g05919	CepurR40.6G038900	CepurR40.2G161400	CepurGG1@6G035700.1	CepurGG1@2G120400.1	Pp3c14_22330	Pp3c1_36580			11	scaffold-HRWG-2070243-Buxbaumia_aphylla	cluster_0327	ABK1
abk1g01195	BA06G11690				Poh0296620			Hypnum@jg2205.t1		Entodon@jg23386.t1		Sc_g05919	CepurR40.6G038900	CepurR40.2G161400	CepurGG1@6G035700.1	CepurGG1@2G120400.1	Pp3c14_22334	Pp3c1_36580			11	scaffold-HRWG-2070243-Buxbaumia_aphylla	cluster_0328	ABK1
abk1g01215		BA11G03590	Poh0198730	Poh0296010			Hypnum@jg2459.t1		Entodon@jg23628.t1		Sc_g07146		CepurR40.2G017900		CepurGG1@2G017200.1		Pp3c14_22470	Pp3c1_36400		Pp3c10_9950	11	scaffold-HRWG-2016675-Buxbaumia_aphylla	cluster_0329	ABK1
abk1g01216		BA11G03590	Poh0198730	Poh0296010			Hypnum@jg2459.t1		Entodon@jg23628.t1		Sc_g07146		CepurR40.2G017900		CepurGG1@2G017200.1		Pp3c14_22470	Pp3c1_36400		Pp3c10_9950	11	scaffold-HRWG-2016675-Buxbaumia_aphylla	cluster_0330	ABK1
abk1g01217		BA11G03600		Poh0198140	Poh0295440		Hypnum@jg2479.t1		Entodon@jg23621.t1		Sc_g07016						Pp3c14_22480	Pp3c1_36410	Pp3c2_4460	Pp3c10_9910	10	scaffold-AWOI-2007369-Diphyscium_foliosum	cluster_0331	ABK1
abk1g01221	BA06G12570	BA11G03580	Poh0310160	Poh0198220	Poh0295500		Hypnum@jg2472.t1		Entodon@jg23608.t1				CepurR40.2G018800		CepurGG1@2G017900.1		Pp3c14_22530		Pp3c2_3780		11	scaffold-AWOI-2013506-Diphyscium_foliosum	cluster_0332	ABK1
abk1g01222	BA06G12570	BA11G03580	Poh0310160	Poh0198220	Poh0295500		Hypnum@jg2472.t1		Entodon@jg23608.t1				CepurR40.2G018800		CepurGG1@2G017900.1		Pp3c14_22530		Pp3c2_3780		11	scaffold-AWOI-2013506-Diphyscium_foliosum	cluster_0333	ABK1
abk1g01223		BA11G03680		Poh0198210	Poh0295490		Hypnum@jg2474.t1		Entodon@jg23609.t1		Sc_g07013		CepurR40.2G018600		CepurGG1@2G017700.1		Pp3c14_22510		Pp3c2_3800		10	scaffold-AWOI-2072630-Diphyscium_foliosum	cluster_0334	ABK1
abk1g01225		BA11G03680		Poh0198210	Poh0295490		Hypnum@jg2474.t1		Entodon@jg23609.t1		Sc_g07013		CepurR40.2G018600		CepurGG1@2G017700.1		Pp3c14_22510		Pp3c2_3800		10	scaffold-AWOI-2072630-Diphyscium_foliosum	cluster_0335	ABK1
abk1g01226	BA06G12570	BA11G03580	Poh0310160	Poh0198220	Poh0295500		Hypnum@jg2472.t1		Entodon@jg23608.t1				CepurR40.2G018800		CepurGG1@2G017900.1		Pp3c14_22530		Pp3c2_3780		11	scaffold-AWOI-2013506-Diphyscium_foliosum	cluster_0336	ABK1
abk1g01231	BA06G12470		Poh0310280							Entodon@jg7766.t1	Sc_g07039		CepurR40.2G019600	CepurR40.6G046800	CepurGG1@2G018800.1		Pp3c14_22580	Pp3c1_39990	Pp3c2_3600	Pp3c10_10130	11	#N/A	cluster_0337	ABK1
abk1g01232	BA06G12470		Poh0310280							Entodon@jg7766.t1	Sc_g07039		CepurR40.2G019600	CepurR40.6G046800	CepurGG1@2G018800.1		Pp3c14_22580	Pp3c1_39990	Pp3c2_3600	Pp3c10_10130	11	#N/A	cluster_0338	ABK1
abk1g01233	BA06G12470		Poh0310280							Entodon@jg7766.t1	Sc_g07039		CepurR40.2G019600	CepurR40.6G046800	CepurGG1@2G018800.1		Pp3c14_22580	Pp3c1_39990	Pp3c2_3600	Pp3c10_10130	11	#N/A	cluster_0339	ABK1
abk1g01240			Poh0310280							Entodon@jg7766.t1	Sc_g07039		CepurR40.2G019600	CepurR40.6G046800	CepurGG1@2G018800.1		Pp3c14_22580	Pp3c1_39990	Pp3c2_3600	Pp3c10_10130	10	#N/A	cluster_0340	ABK1
abk1g01251		BA11G03400		Poh0296930		Poh0200750	Hypnum@jg2465.t1		Entodon@jg23600.t1		Sc_g07037		CepurR40.2G019800		CepurGG1@2G019000.1		Pp3c14_22720	Pp3c1_39920		Pp3c10_10670	11	scaffold-AWOI-2014353-Diphyscium_foliosum	cluster_0341	ABK1
abk1g01257	BA06G12450	BA11G03420	Poh0310300	Poh0296950	Poh0100690	Poh0200720	Hypnum@jg2487.t1	Hypnum@jg28398.t1	Entodon@jg23596.t1	Entodon@jg7758.t1			CepurR40.2G020200	CepurR40.6G046500	CepurGG1@2G019300.1		Pp3c14_22750	Pp3c1_39900	Pp3c2_3540		16	scaffold-HRWG-2005869-Buxbaumia_aphylla	cluster_0342	ABK1
abk1g01258	BA06G12450	BA11G03420	Poh0310300	Poh0296950	Poh0100690	Poh0200720	Hypnum@jg2487.t1	Hypnum@jg28398.t1	Entodon@jg23596.t1	Entodon@jg7758.t1			CepurR40.2G020200	CepurR40.6G046500	CepurGG1@2G019300.1		Pp3c14_22750	Pp3c1_39900	Pp3c2_3540		16	scaffold-HRWG-2005869-Buxbaumia_aphylla	cluster_0343	ABK1
abk1g01259	BA06G12450	BA11G03420	Poh0310300	Poh0296950	Poh0100690	Poh0200720	Hypnum@jg2487.t1	Hypnum@jg28398.t1	Entodon@jg23596.t1	Entodon@jg7758.t1			CepurR40.2G020200	CepurR40.6G046500	CepurGG1@2G019300.1		Pp3c14_22750	Pp3c1_39900	Pp3c2_3540		16	scaffold-HRWG-2005869-Buxbaumia_aphylla	cluster_0344	ABK1
abk1g01260	BA06G12450	BA11G03420	Poh0310300	Poh0296950	Poh0100690	Poh0200720	Hypnum@jg2487.t1	Hypnum@jg28398.t1	Entodon@jg23596.t1	Entodon@jg7758.t1			CepurR40.2G020200	CepurR40.6G046500	CepurGG1@2G019300.1		Pp3c14_22750	Pp3c1_39900	Pp3c2_3540		16	scaffold-HRWG-2005869-Buxbaumia_aphylla	cluster_0345	ABK1
abk1g01261	BA06G12450	BA11G03420	Poh0310300	Poh0296950	Poh0100690	Poh0200720	Hypnum@jg2487.t1	Hypnum@jg28398.t1	Entodon@jg23596.t1	Entodon@jg7758.t1			CepurR40.2G020200	CepurR40.6G046500	CepurGG1@2G019300.1		Pp3c14_22750	Pp3c1_39900	Pp3c2_3540		16	scaffold-AWOI-2005036-Diphyscium_foliosum	cluster_0346	ABK1
abk1g01262	BA06G12450	BA11G03420	Poh0310300	Poh0296950	Poh0100690	Poh0200720	Hypnum@jg2487.t1	Hypnum@jg28398.t1	Entodon@jg23596.t1	Entodon@jg7758.t1			CepurR40.2G020200	CepurR40.6G046500	CepurGG1@2G019300.1		Pp3c14_22750	Pp3c1_39900	Pp3c2_3540		16	scaffold-HRWG-2005869-Buxbaumia_aphylla	cluster_0347	ABK1
abk1g01263	BA06G12460		Poh0310290	Poh0296940	Poh0100700	Poh0200740	Hypnum@jg2463.t1	Hypnum@jg28397.t1	Entodon@jg23598.t1	Entodon@jg7760.t1	Sc_g07036		CepurR40.2G020100	CepurR40.6G046700	CepurGG1@2G019200.1		Pp3c14_22730	Pp3c1_39910	Pp3c2_3550		16	scaffold-HRWG-2005585-Buxbaumia_aphylla	cluster_0348	ABK1
abk1g01264	BA06G12460		Poh0310290	Poh0296940	Poh0100700	Poh0200740	Hypnum@jg2463.t1	Hypnum@jg28397.t1	Entodon@jg23598.t1	Entodon@jg7760.t1	Sc_g07036		CepurR40.2G020100	CepurR40.6G046700	CepurGG1@2G019200.1		Pp3c14_22730	Pp3c1_39910	Pp3c2_3550		16	scaffold-HRWG-2005585-Buxbaumia_aphylla	cluster_0349	ABK1
abk1g01265	BA06G12460		Poh0310290	Poh0296940	Poh0100700		Hypnum@jg2463.t1	Hypnum@jg28397.t1	Entodon@jg23598.t1	Entodon@jg7760.t1	Sc_g07036		CepurR40.2G020100	CepurR40.6G046700	CepurGG1@2G019200.1		Pp3c14_22730	Pp3c1_39910	Pp3c2_3550		15	scaffold-HRWG-2005585-Buxbaumia_aphylla	cluster_0350	ABK1
abk1g01266	BA06G12460		Poh0310290	Poh0296940	Poh0100700		Hypnum@jg2463.t1	Hypnum@jg28397.t1	Entodon@jg23598.t1	Entodon@jg7760.t1	Sc_g07036		CepurR40.2G020100		CepurGG1@2G019200.1		Pp3c14_22730	Pp3c1_39910			13	scaffold-HRWG-2005585-Buxbaumia_aphylla	cluster_0351	ABK1
abk1g01267	BA06G12460		Poh0310290	Poh0296940	Poh0100700		Hypnum@jg2463.t1	Hypnum@jg28397.t1	Entodon@jg23598.t1	Entodon@jg7760.t1	Sc_g07036		CepurR40.2G020100		CepurGG1@2G019200.1		Pp3c14_22730	Pp3c1_39910			13	scaffold-HRWG-2005585-Buxbaumia_aphylla	cluster_0352	ABK1
abk1g01268	BA06G12450	BA11G03420	Poh0310300	Poh0296950	Poh0100690		Hypnum@jg2487.t1	Hypnum@jg28398.t1	Entodon@jg23596.t1	Entodon@jg7758.t1			CepurR40.2G020200		CepurGG1@2G019300.1		Pp3c14_22750	Pp3c1_39900			13	scaffold-HRWG-2005869-Buxbaumia_aphylla	cluster_0353	ABK1
abk1g01282	BA06G12340	BA11G03430	Poh0310350	Poh0296960	Poh0100640		Hypnum@jg2542.t1	Hypnum@jg28406.t1	Entodon@jg23595.t1	Entodon@jg7748.t1	Sc_g07032	Sc_g08546	CepurR40.2G020400	CepurR40.6G045500	CepurGG1@2G019500.1	CepurGG1@6G041400.1	Pp3c14_22950				16	scaffold-HRWG-2069769-Buxbaumia_aphylla	cluster_0354	ABK1
abk1g01283	BA06G12290	BA11G03380	Poh0310410	Poh0297030	Poh0100560		Hypnum@jg2536.t1		Entodon@jg23590.t1				CepurR40.2G021000	CepurR40.6G044700	CepurGG1@2G020200.1	CepurGG1@6G042100.1	Pp3c14_22960				12	scaffold-AWOI-2010716-Diphyscium_foliosum	cluster_0355	ABK1
abk1g01331	BA06G13690		Poh0295230	Poh0197910	Poh0309390	Poh0097830		Hypnum@jg28826.t1	Entodon@jg23292.t1			Sc_g07077					Pp3c14_23640	Pp3c17_22710			10	scaffold-AWOI-2014283-Diphyscium_foliosum	cluster_0356	ABK1
abk1g01335			Poh0295180	Poh0197850	Poh0309380	Poh0097820	Hypnum@jg2113.t1		Entodon@jg23308.t1		Sc_g06801		CepurR40.2G030600		CepurGG1@2G030000.1		Pp3c14_23730				10	scaffold-AWOI-2073113-Diphyscium_foliosum	cluster_0357	ABK1
abk1g01361		BA06G14770			Poh0308030	Poh0368350					Sc_g08832	Sc_g07062	CepurR40.2G003300	CepurR40.6G067500	CepurGG1@2G003300.1	CepurGG1@6G063400.1	Pp3c14_24090	Pp3c17_23200	Pp3c2_590		12	scaffold-HRWG-2016643-Buxbaumia_aphylla	cluster_0358	ABK1
abk1g01365	BA11G04660	BA06G14740	Poh0295300	Poh0198000	Poh0308010	Poh0368310	Hypnum@jg2244.t1		Entodon@jg23410.t1		Sc_g08836	Sc_g07059	CepurR40.2G003600	CepurR40.6G067200	CepurGG1@2G003600.1	CepurGG1@6G063100.1	Pp3c14_24180	Pp3c17_23280	Pp3c2_570		17	scaffold-HRWG-2015407-Buxbaumia_aphylla	cluster_0359	ABK1
abk1g01366	BA11G04660	BA06G14740	Poh0295300	Poh0198000	Poh0308010	Poh0368310	Hypnum@jg2244.t1		Entodon@jg23410.t1		Sc_g08836	Sc_g07059	CepurR40.2G003600	CepurR40.6G067200	CepurGG1@2G003600.1	CepurGG1@6G063100.1	Pp3c14_24180	Pp3c17_23280	Pp3c2_570		17	scaffold-HRWG-2015407-Buxbaumia_aphylla	cluster_0360	ABK1
abk1g01367			Poh0295290	Poh0198010			Hypnum@jg2245.t1		Entodon@jg23411.t1			Sc_g07060	CepurR40.2G003500		CepurGG1@2G003500.1		Pp3c14_24160	Pp3c17_23270	Pp3c2_370		10	scaffold-AWOI-2069495-Diphyscium_foliosum	cluster_0361	ABK1
abk1g01371			Poh0295290	Poh0198010			Hypnum@jg2245.t1		Entodon@jg23411.t1			Sc_g07060	CepurR40.2G003500		CepurGG1@2G003500.1		Pp3c14_24160	Pp3c17_23270	Pp3c2_370		10	scaffold-AWOI-2069495-Diphyscium_foliosum	cluster_0362	ABK1
abk1g01372	BA11G04650	BA06G14730	Poh0295310	Poh0197990	Poh0308000	Poh0368300	Hypnum@jg2241.t1		Entodon@jg23409.t1		Sc_g08837		CepurR40.2G003700	CepurR40.6G067100	CepurGG1@2G003700.1	CepurGG1@6G063000.1	Pp3c14_24190	Pp3c17_23300			15	scaffold-HRWG-2070107-Buxbaumia_aphylla	cluster_0363	ABK1
abk1g01373	BA11G04650	BA06G14730	Poh0295310	Poh0197990	Poh0308000	Poh0368300	Hypnum@jg2241.t1		Entodon@jg23409.t1		Sc_g08837		CepurR40.2G003700	CepurR40.6G067100	CepurGG1@2G003700.1	CepurGG1@6G063000.1	Pp3c14_24190	Pp3c17_23300			15	scaffold-HRWG-2070107-Buxbaumia_aphylla	cluster_0364	ABK1
abk1g01374	BA11G04650	BA06G14730	Poh0295310	Poh0197990	Poh0308000	Poh0368300	Hypnum@jg2241.t1		Entodon@jg23409.t1		Sc_g08837		CepurR40.2G003700	CepurR40.6G067100	CepurGG1@2G003700.1	CepurGG1@6G063000.1	Pp3c14_24190	Pp3c17_23300			15	scaffold-HRWG-2070107-Buxbaumia_aphylla	cluster_0365	ABK1
abk1g01375	BA11G04650	BA06G14730	Poh0295310	Poh0197990	Poh0308000	Poh0368300	Hypnum@jg2241.t1		Entodon@jg23409.t1		Sc_g08837		CepurR40.2G003700	CepurR40.6G067100	CepurGG1@2G003700.1	CepurGG1@6G063000.1	Pp3c14_24190	Pp3c17_23300			15	scaffold-HRWG-2070107-Buxbaumia_aphylla	cluster_0366	ABK1
abk1g01376			Poh0295290	Poh0198010			Hypnum@jg2245.t1		Entodon@jg23411.t1			Sc_g07060	CepurR40.2G003500		CepurGG1@2G003500.1		Pp3c14_24160	Pp3c17_23270	Pp3c2_370		10	scaffold-AWOI-2069495-Diphyscium_foliosum	cluster_0367	ABK1
abk1g01377			Poh0295290	Poh0198010			Hypnum@jg2245.t1		Entodon@jg23411.t1			Sc_g07060	CepurR40.2G003500		CepurGG1@2G003500.1		Pp3c14_24160	Pp3c17_23270	Pp3c2_370		10	scaffold-AWOI-2069495-Diphyscium_foliosum	cluster_0368	ABK1
abk1g01378			Poh0295290	Poh0198010			Hypnum@jg2245.t1		Entodon@jg23411.t1			Sc_g07060	CepurR40.2G003500		CepurGG1@2G003500.1		Pp3c14_24160	Pp3c17_23270	Pp3c2_370		10	scaffold-AWOI-2069495-Diphyscium_foliosum	cluster_0369	ABK1
abk1g01379	BA11G04650	BA06G14730	Poh0295310	Poh0197990	Poh0308000	Poh0368300	Hypnum@jg2241.t1		Entodon@jg23409.t1		Sc_g08837		CepurR40.2G003700	CepurR40.6G067100	CepurGG1@2G003700.1	CepurGG1@6G063000.1	Pp3c14_24190	Pp3c17_23300			15	scaffold-HRWG-2070107-Buxbaumia_aphylla	cluster_0370	ABK1
abk1g01380	BA11G04660	BA06G14740	Poh0295300	Poh0198000	Poh0308010	Poh0368310			Entodon@jg23410.t1		Sc_g08836	Sc_g07059	CepurR40.2G003600	CepurR40.6G067200	CepurGG1@2G003600.1	CepurGG1@6G063100.1	Pp3c14_24180	Pp3c17_23280	Pp3c2_570		16	scaffold-HRWG-2015407-Buxbaumia_aphylla	cluster_0371	ABK1
abk1g01382	BA11G04660	BA06G14740	Poh0295300	Poh0198000	Poh0308010	Poh0368310			Entodon@jg23410.t1		Sc_g08836	Sc_g07059	CepurR40.2G003600	CepurR40.6G067200	CepurGG1@2G003600.1	CepurGG1@6G063100.1	Pp3c14_24180	Pp3c17_23280	Pp3c2_570		16	scaffold-HRWG-2015407-Buxbaumia_aphylla	cluster_0372	ABK1
abk1g01383	BA11G04660	BA06G14740	Poh0295300	Poh0198000	Poh0308010	Poh0368310	Hypnum@jg2244.t1		Entodon@jg23410.t1		Sc_g08836	Sc_g07059	CepurR40.2G003600	CepurR40.6G067200	CepurGG1@2G003600.1	CepurGG1@6G063100.1	Pp3c14_24180	Pp3c17_23280	Pp3c2_570		17	scaffold-HRWG-2015407-Buxbaumia_aphylla	cluster_0373	ABK1
abk1g01384	BA11G04660	BA06G14740	Poh0295300	Poh0198000	Poh0308010	Poh0368310	Hypnum@jg2244.t1		Entodon@jg23410.t1		Sc_g08836	Sc_g07059	CepurR40.2G003600	CepurR40.6G067200	CepurGG1@2G003600.1	CepurGG1@6G063100.1	Pp3c14_24180	Pp3c17_23280	Pp3c2_570		17	scaffold-HRWG-2015407-Buxbaumia_aphylla	cluster_0374	ABK1
abk1g01385	BA11G04650	BA06G14730	Poh0295310	Poh0197990	Poh0308000	Poh0368300	Hypnum@jg2241.t1		Entodon@jg23409.t1		Sc_g08837		CepurR40.2G003700	CepurR40.6G067100	CepurGG1@2G003700.1	CepurGG1@6G063000.1	Pp3c14_24190	Pp3c17_23300			15	scaffold-HRWG-2070107-Buxbaumia_aphylla	cluster_0375	ABK1
abk1g01387	BA11G04640		Poh0295320	Poh0197980			Hypnum@jg2238.t1		Entodon@jg23407.t1		Sc_g08849		CepurR40.2G004000	CepurR40.6G066400	CepurGG1@2G004000.1	CepurGG1@6G062500.1	Pp3c14_24240	Pp3c17_23380			12	scaffold-HRWG-2067643-Buxbaumia_aphylla	cluster_0376	ABK1
abk1g01394		BA06G14660			Poh0307930	Poh0368230						Sc_g07074	CepurR40.2G004600	CepurR40.6G065600	CepurGG1@2G004500.1	CepurGG1@6G061600.1	Pp3c14_24300	Pp3c17_23450	Pp3c2_520		11	scaffold-HRWG-2008349-Buxbaumia_aphylla	cluster_0377	ABK1
abk1g01431	BA11G00240		Poh0202880	Poh0032740			Hypnum@jg1805.t1		Entodon@jg22941.t1		Sc_g06509		CepurR40.2G050000		CepurGG1@2G048900.1		Pp3c14_24850	Pp3c17_14470			10	scaffold-AWOI-2010314-Diphyscium_foliosum	cluster_0378	ABK1
abk1g01432	BA11G00240		Poh0202880	Poh0032740			Hypnum@jg1805.t1		Entodon@jg22941.t1		Sc_g06509		CepurR40.2G050000		CepurGG1@2G048900.1		Pp3c14_24850	Pp3c17_14470			10	scaffold-AWOI-2010314-Diphyscium_foliosum	cluster_0379	ABK1
abk1g01433	BA11G00230		Poh0202890	Poh0032750			Hypnum@jg1811.t1		Entodon@jg22949.t1		Sc_g06510		CepurR40.2G049900		CepurGG1@2G048800.1		Pp3c14_24840	Pp3c17_14330			10	scaffold-HRWG-2009075-Buxbaumia_aphylla	cluster_0380	ABK1
abk1g01437	BA11G00230		Poh0202890	Poh0032750			Hypnum@jg1811.t1		Entodon@jg22949.t1		Sc_g06510		CepurR40.2G049900		CepurGG1@2G048800.1		Pp3c14_24840	Pp3c17_14370			10	scaffold-HRWG-2009075-Buxbaumia_aphylla	cluster_0381	ABK1
abk1g01440	BA11G00230		Poh0202860	Poh0032720			Hypnum@jg1800.t1		Entodon@jg22939.t1		Sc_g06508		CepurR40.2G050400		CepurGG1@2G049400.1		Pp3c14_24890	Pp3c17_14370			10	scaffold-AWOI-2003938-Diphyscium_foliosum	cluster_0382	ABK1
abk1g01441	BA11G00230		Poh0202860	Poh0032720			Hypnum@jg1800.t1		Entodon@jg22939.t1		Sc_g06508		CepurR40.2G050400		CepurGG1@2G049400.1		Pp3c14_24890	Pp3c17_14370			10	scaffold-HRWG-2015548-Buxbaumia_aphylla	cluster_0383	ABK1
abk1g01442	BA11G00240		Poh0202880	Poh0032740			Hypnum@jg1805.t1		Entodon@jg22941.t1		Sc_g06509		CepurR40.2G050000		CepurGG1@2G048900.1		Pp3c14_24850	Pp3c17_14470			10	scaffold-AWOI-2010314-Diphyscium_foliosum	cluster_0384	ABK1
abk1g01466			Poh0037280	Poh0175960			Hypnum@jg572.t1		Entodon@jg21802.t1		Sc_g09379		CepurR40.6G131000	CepurR40.2G241800	CepurGG1@6G125700.1		Pp3c14_25170	Pp3c10_11120	Pp3c2_15910		11	scaffold-AWOI-2002662-Diphyscium_foliosum	cluster_0385	ABK1
abk1g01467			Poh0037270	Poh0175950			Hypnum@jg573.t1		Entodon@jg21803.t1		Sc_g09380		CepurR40.6G131100	CepurR40.2G241900	CepurGG1@6G125800.1		Pp3c14_25160	Pp3c10_11160			10	scaffold-AWOI-2005144-Diphyscium_foliosum	cluster_0386	ABK1
abk1g01468			Poh0037280	Poh0175960			Hypnum@jg572.t1		Entodon@jg21802.t1		Sc_g09379		CepurR40.6G131000	CepurR40.2G241800	CepurGG1@6G125700.1		Pp3c14_25170	Pp3c10_11120	Pp3c2_15910		11	scaffold-AWOI-2002662-Diphyscium_foliosum	cluster_0387	ABK1
abk1g01473	BA06G04620		Poh0367640	Poh0202310	Poh0032080	Poh0338760	Hypnum@jg27346.t1	Hypnum@jg1710.t1	Entodon@jg6581.t1	Entodon@jg22862.t1				CepurR40.2G076900		CepurGG1@2G092300.1	Pp3c14_25230	Pp3c10_11020			13	scaffold-AWOI-2069792-Diphyscium_foliosum	cluster_0388	ABK1
abk1g01475	BA06G04630		Poh0367650	Poh0202300	Poh0032070	Poh0338770	Hypnum@jg27347.t1	Hypnum@jg1708.t1	Entodon@jg6582.t1	Entodon@jg22861.t1			CepurR40.6G132800	CepurR40.2G077000	CepurGG1@6G127700.1	CepurGG1@2G092200.1		Pp3c10_11010	Pp3c2_15870		15	scaffold-AWOI-2071089-Diphyscium_foliosum	cluster_0389	ABK1
abk1g01477	BA06G04660		Poh0367590	Poh0202280	Poh0032040	Poh0338810	Hypnum@jg27348.t1	Hypnum@jg1700.t1	Entodon@jg6583.t1	Entodon@jg22851.t1			CepurR40.6G133100		CepurGG1@6G128000.1				Pp3c2_15860		12	scaffold-AWOI-2013723-Diphyscium_foliosum	cluster_0390	ABK1
abk1g01478	BA06G04630		Poh0367650	Poh0202300	Poh0032070	Poh0338770	Hypnum@jg27347.t1	Hypnum@jg1708.t1	Entodon@jg6582.t1	Entodon@jg22861.t1	Sc_g06557		CepurR40.6G132800	CepurR40.2G077000	CepurGG1@6G127700.1	CepurGG1@2G092200.1		Pp3c10_11010	Pp3c2_15870		16	scaffold-AWOI-2071089-Diphyscium_foliosum	cluster_0391	ABK1
abk1g01481	BA06G04620		Poh0367640	Poh0202310	Poh0032080	Poh0338760	Hypnum@jg27346.t1	Hypnum@jg1710.t1	Entodon@jg6581.t1	Entodon@jg22862.t1				CepurR40.2G076900		CepurGG1@2G092300.1	Pp3c14_25230	Pp3c10_11020			13	scaffold-HRWG-2008136-Buxbaumia_aphylla	cluster_0392	ABK1
abk1g01493	BA06G04560		Poh0367660	Poh0202370	Poh0032120	Poh0338720	Hypnum@jg27355.t1	Hypnum@jg1713.t1	Entodon@jg6593.t1	Entodon@jg22866.t1	Sc_g06560		CepurR40.6G133800		CepurGG1@6G128500.1		Pp3c14_25320	Pp3c10_10860			14	scaffold-AWOI-2069913-Diphyscium_foliosum	cluster_0393	ABK1
abk1g01500	BA06G04560		Poh0367660	Poh0202360	Poh0032130	Poh0338720	Hypnum@jg27355.t1	Hypnum@jg1713.t1	Entodon@jg6593.t1	Entodon@jg22866.t1	Sc_g06560		CepurR40.6G133800		CepurGG1@6G128500.1		Pp3c14_25320	Pp3c10_10860			14	scaffold-AWOI-2069913-Diphyscium_foliosum	cluster_0394	ABK1
abk1g01501	BA06G04560		Poh0367660	Poh0202370	Poh0032120	Poh0338720	Hypnum@jg27355.t1	Hypnum@jg1713.t1	Entodon@jg6593.t1	Entodon@jg22866.t1	Sc_g06560		CepurR40.6G133800		CepurGG1@6G128500.1		Pp3c14_25320	Pp3c10_10860			14	scaffold-AWOI-2069913-Diphyscium_foliosum	cluster_0395	ABK1
abk1g01502	BA06G04560		Poh0367660	Poh0202370	Poh0032140	Poh0338720	Hypnum@jg27355.t1	Hypnum@jg1713.t1	Entodon@jg6593.t1	Entodon@jg22866.t1	Sc_g06560		CepurR40.6G133800		CepurGG1@6G128500.1		Pp3c14_25320	Pp3c10_10860			14	scaffold-AWOI-2069913-Diphyscium_foliosum	cluster_0396	ABK1
abk1g01503	BA06G04560		Poh0367660	Poh0202360	Poh0032120			Hypnum@jg1713.t1		Entodon@jg22866.t1	Sc_g06560		CepurR40.6G133800		CepurGG1@6G128500.1		Pp3c14_25320	Pp3c10_10860			11	scaffold-AWOI-2069913-Diphyscium_foliosum	cluster_0397	ABK1
abk1g01504			Poh0367660	Poh0202370	Poh0032130			Hypnum@jg1713.t1		Entodon@jg22866.t1	Sc_g06560		CepurR40.6G133800		CepurGG1@6G128500.1		Pp3c14_25320	Pp3c10_10860			10	scaffold-AWOI-2069913-Diphyscium_foliosum	cluster_0398	ABK1
abk1g01515	BA06G04580			Poh0202390	Poh0032160			Hypnum@jg1716.t1	Entodon@jg6598.t1	Entodon@jg22868.t1	Sc_g06564		CepurR40.6G134300		CepurGG1@6G128900.1		Pp3c14_25540	Pp3c10_10840			11	scaffold-AWOI-2071085-Diphyscium_foliosum	cluster_0399	ABK1
abk1g01517	BA06G10500		Poh0201310	Poh0031100	Poh0196730	Poh0099550	Hypnum@jg28526.t1	Hypnum@jg2338.t1		Entodon@jg7644.t1	Sc_g06986	Sc_g08726	CepurR40.2G166500	CepurR40.6G032800	CepurGG1@N002300.1	CepurGG1@6G029900.1	Pp3c14_25560				15	scaffold-AWOI-2009104-Diphyscium_foliosum	cluster_0400	ABK1
abk1g01518	BA06G10500		Poh0201310	Poh0031100	Poh0196730	Poh0099550	Hypnum@jg28526.t1	Hypnum@jg2338.t1		Entodon@jg7644.t1	Sc_g06986	Sc_g08726	CepurR40.2G166500	CepurR40.6G032800	CepurGG1@N002300.1	CepurGG1@6G029900.1	Pp3c14_25570				15	scaffold-AWOI-2012871-Diphyscium_foliosum	cluster_0401	ABK1
abk1g01524	BA06G10460		Poh0201300	Poh0031090	Poh0196780	Poh0099580	Hypnum@jg28529.t1		Entodon@jg23223.t1	Entodon@jg7640.t1	Sc_g06990	Sc_g08729	CepurR40.2G166200	CepurR40.6G033300	CepurGG1@N002900.1	CepurGG1@6G030400.1	Pp3c14_25660				15	#N/A	cluster_0402	ABK1
abk1g01527	BA06G10460		Poh0201300	Poh0031090	Poh0196780	Poh0099580	Hypnum@jg28529.t1		Entodon@jg23223.t1	Entodon@jg7640.t1	Sc_g06990	Sc_g08729	CepurR40.2G166200	CepurR40.6G033300	CepurGG1@N002900.1	CepurGG1@6G030400.1	Pp3c14_25660				15	#N/A	cluster_0403	ABK1
abk1g01528	BA06G10460		Poh0201300	Poh0031090	Poh0196780	Poh0099580	Hypnum@jg28529.t1		Entodon@jg23223.t1	Entodon@jg7640.t1	Sc_g06990	Sc_g08729	CepurR40.2G166200	CepurR40.6G033300	CepurGG1@N002900.1	CepurGG1@6G030400.1	Pp3c14_25660				15	scaffold-AWOI-2002168-Diphyscium_foliosum	cluster_0404	ABK1
abk1g01539	BA06G10520		Poh0201230	Poh0031020	Poh0196810	Poh0099600	Hypnum@jg28531.t1			Entodon@jg7637.t1	Sc_g06995	Sc_g08710		CepurR40.6G036000		CepurGG1@6G033200.1	Pp3c14_25780				12	scaffold-AWOI-2013148-Diphyscium_foliosum	cluster_0405	ABK1
abk1g01541	BA06G10520		Poh0201230	Poh0031020	Poh0196810	Poh0099600	Hypnum@jg28531.t1			Entodon@jg7637.t1	Sc_g06995	Sc_g08710		CepurR40.6G036000		CepurGG1@6G033200.1	Pp3c14_25780				12	scaffold-AWOI-2013148-Diphyscium_foliosum	cluster_0406	ABK1
abk1g01566	BA06G15030		Poh0367840	Poh0307640			Hypnum@jg29042.t1		Entodon@jg8104.t1		Sc_g07129		CepurR40.2G005000		CepurGG1@2G004900.1		Pp3c14_26240	Pp3c17_23510			10	scaffold-AWOI-2069898-Diphyscium_foliosum	cluster_0407	ABK1
abk1g01568	BA06G15030		Poh0367840	Poh0307640			Hypnum@jg29042.t1		Entodon@jg8104.t1		Sc_g07129		CepurR40.2G005000		CepurGG1@2G004900.1		Pp3c14_26240	Pp3c17_23510			10	scaffold-AWOI-2069898-Diphyscium_foliosum	cluster_0408	ABK1
abk1g01569	BA06G15030		Poh0367840	Poh0307640			Hypnum@jg29042.t1		Entodon@jg8104.t1		Sc_g07129		CepurR40.2G005000		CepurGG1@2G004900.1		Pp3c14_26240	Pp3c17_23510			10	scaffold-AWOI-2069898-Diphyscium_foliosum	cluster_0409	ABK1
abk1g01570	BA06G15000		Poh0367980	Poh0307750			Hypnum@jg29021.t1		Entodon@jg8107.t1		Sc_g07130		CepurR40.2G005100	CepurR40.6G079500	CepurGG1@2G005000.1	CepurGG1@6G075100.1	Pp3c14_26250	Pp3c17_23530			12	scaffold-AWOI-2071853-Diphyscium_foliosum	cluster_0410	ABK1
abk1g01579	BA06G15000		Poh0367980	Poh0307750			Hypnum@jg29021.t1		Entodon@jg8107.t1		Sc_g07130		CepurR40.2G005100	CepurR40.6G079500	CepurGG1@2G005000.1	CepurGG1@6G075100.1	Pp3c14_26250	Pp3c17_23530			12	scaffold-AWOI-2071853-Diphyscium_foliosum	cluster_0411	ABK1
abk1g01580	BA06G15000		Poh0367980	Poh0307750			Hypnum@jg29021.t1		Entodon@jg8107.t1		Sc_g07130		CepurR40.2G005100	CepurR40.6G079500	CepurGG1@2G005000.1	CepurGG1@6G075100.1	Pp3c14_26250	Pp3c17_23530			12	scaffold-AWOI-2071853-Diphyscium_foliosum	cluster_0412	ABK1
abk1g01581	BA06G15000		Poh0367980	Poh0307750			Hypnum@jg29021.t1		Entodon@jg8107.t1		Sc_g07130		CepurR40.2G005100	CepurR40.6G079500	CepurGG1@2G005000.1	CepurGG1@6G075100.1	Pp3c14_26250	Pp3c17_23530			12	scaffold-AWOI-2071853-Diphyscium_foliosum	cluster_0413	ABK1
abk1g01582	BA06G15000		Poh0367980	Poh0307750			Hypnum@jg29021.t1		Entodon@jg8107.t1		Sc_g07130		CepurR40.2G005100	CepurR40.6G079500	CepurGG1@2G005000.1	CepurGG1@6G075100.1	Pp3c14_26250	Pp3c17_23530			12	scaffold-AWOI-2071853-Diphyscium_foliosum	cluster_0414	ABK1
abk1g01583	BA06G15020		Poh0368020	Poh0307770			Hypnum@jg29017.t1		Entodon@jg8097.t1		Sc_g07132		CepurR40.2G005400		CepurGG1@2G005100.1		Pp3c14_26270	Pp3c17_23560			10	scaffold-AWOI-2073288-Diphyscium_foliosum	cluster_0415	ABK1
abk1g01584	BA06G15020		Poh0368020	Poh0307770			Hypnum@jg29017.t1		Entodon@jg8097.t1		Sc_g07132		CepurR40.2G005400		CepurGG1@2G005100.1		Pp3c14_26270	Pp3c17_23560			10	scaffold-AWOI-2073288-Diphyscium_foliosum	cluster_0416	ABK1
abk1g01585	BA06G15020		Poh0368020	Poh0307770			Hypnum@jg29017.t1		Entodon@jg8097.t1		Sc_g07132		CepurR40.2G005400		CepurGG1@2G005100.1		Pp3c14_26270	Pp3c17_23560			10	scaffold-AWOI-2073288-Diphyscium_foliosum	cluster_0417	ABK1
abk1g01586	BA06G15020		Poh0368020	Poh0307770			Hypnum@jg29017.t1		Entodon@jg8097.t1		Sc_g07132		CepurR40.2G005400		CepurGG1@2G005100.1		Pp3c14_26270	Pp3c17_23560			10	scaffold-AWOI-2073288-Diphyscium_foliosum	cluster_0418	ABK1
abk1g01587		BA11G05340	Poh0368030	Poh0307780	Poh0197300	Poh0294370	Hypnum@jg29015.t1		Entodon@jg8094.t1		Sc_g07133				CepurGG1@2G005300.1		Pp3c14_26290	Pp3c17_23570			11	scaffold-AWOI-2010264-Diphyscium_foliosum	cluster_0419	ABK1
abk1g01589		BA11G05340	Poh0368030	Poh0307780	Poh0197300	Poh0294370	Hypnum@jg29015.t1		Entodon@jg8094.t1		Sc_g07133				CepurGG1@2G005300.1		Pp3c14_26290	Pp3c17_23570			11	scaffold-AWOI-2010264-Diphyscium_foliosum	cluster_0420	ABK1
abk1g01590	BA06G14940		Poh0367920	Poh0307710	Poh0372010	Poh0294350	Hypnum@jg29034.t1		Entodon@jg8091.t1					CepurR40.6G080400		CepurGG1@6G075600.1	Pp3c14_26310	Pp3c17_23590			11	scaffold-HRWG-2070310-Buxbaumia_aphylla	cluster_0421	ABK1
abk1g01611	BA06G02100		Poh0103530				Hypnum@jg28194.t1				Sc_g06946	Sc_g08868	CepurR40.2G038800	CepurR40.6G091500	CepurGG1@2G038100.1	CepurGG1@6G087400.1	Pp3c14_26590				10	#N/A	cluster_0422	ABK1
abk2g02189	BA03G05750		Poh0168790	Poh0136730	Poh0111400	Poh0008920	Hypnum@jg4362.t1		Entodon@jg19883.t1				CepurR40.9G190800		CepurGG1@9G188400.1		Pp3c11_880	Pp3c7_26860	Pp3c1_370		12	scaffold-AWOI-2007419-Diphyscium_foliosum	cluster_0423	ABK2
abk2g00619	BA03G11440		Poh0187580	Poh0208360			Hypnum@jg5366.t1		Entodon@jg18994.t1		Sc_g15798		CepurR40.9G149300		CepurGG1@9G143400.1		Pp3c11_1790	Pp3c7_24490			10	scaffold-AWOI-2073394-Diphyscium_foliosum	cluster_0424	ABK2
abk2g00671	BA03G11450		Poh0187570	Poh0208370			Hypnum@jg5376.t1		Entodon@jg19000.t1		Sc_g15796		CepurR40.9G149300		CepurGG1@9G143400.1		Pp3c11_1840	Pp3c7_24490			10	scaffold-AWOI-2073394-Diphyscium_foliosum	cluster_0425	ABK2
abk2g00924	BA03G11480	BA04G20000	Poh0187560	Poh0208380		Poh0109960	Hypnum@jg5377.t1		Entodon@jg19001.t1	Entodon@jg1059.t1	Sc_g15808				CepurGG1@9G170700.1		Pp3c11_2110	Pp3c7_24640	Pp3c1_900		13	scaffold-AWOI-2072538-Diphyscium_foliosum	cluster_0426	ABK2
abk2g01445	BA03G12230		Poh0353280	Poh0329560	Poh0001980			Hypnum@jg19996.t1	Entodon@jg20232.t1	Entodon@jg2248.t1	Sc_g15939		CepurR40.9G081000		CepurGG1@9G060600.1		Pp3c11_2530	Pp3c7_21070		Pp3c2_34780	13	scaffold-AWOI-2067470-Diphyscium_foliosum	cluster_0427	ABK2
abk2g01449	BA03G12230		Poh0353280	Poh0329560	Poh0001980			Hypnum@jg19996.t1	Entodon@jg20232.t1	Entodon@jg2248.t1	Sc_g15939		CepurR40.9G081000		CepurGG1@9G060600.1		Pp3c11_2530	Pp3c7_21070		Pp3c2_34780	13	scaffold-AWOI-2067470-Diphyscium_foliosum	cluster_0428	ABK2
abk2g01634	BA03G12200	BA04G12100	Poh0353340	Poh0329610	Poh0001950	Poh0018940		Hypnum@jg19990.t1	Entodon@jg20236.t1	Entodon@jg2243.t1	Sc_g15947		CepurR40.9G080000		CepurGG1@9G062000.1		Pp3c11_2650	Pp3c7_21220	Pp3c1_1650	Pp3c2_34670	16	scaffold-HRWG-2070680-Buxbaumia_aphylla	cluster_0429	ABK2
abk2g01669		BA04G12110			Poh0001940	Poh0018920		Hypnum@jg19984.t1		Entodon@jg2241.t1	Sc_g15945		CepurR40.9G080200		CepurGG1@9G061700.1		Pp3c11_2710	Pp3c7_21240			10	scaffold-AWOI-2072043-Diphyscium_foliosum	cluster_0430	ABK2
abk2g01673	BA03G12160	BA04G12140	Poh0353360	Poh0329630	Poh0001920	Poh0018980		Hypnum@jg19978.t1		Entodon@jg2234.t1	Sc_g15943		CepurR40.9G080500		CepurGG1@9G061500.1		Pp3c11_2790	Pp3c7_21310		Pp3c2_34630	14	scaffold-HRWG-2015044-Buxbaumia_aphylla	cluster_0431	ABK2
abk2g01674	BA03G12160	BA04G12140	Poh0353360	Poh0329630	Poh0001920	Poh0018980		Hypnum@jg19978.t1		Entodon@jg2234.t1	Sc_g15943		CepurR40.9G080500		CepurGG1@9G061500.1		Pp3c11_2790	Pp3c7_21310		Pp3c2_34630	14	scaffold-HRWG-2015044-Buxbaumia_aphylla	cluster_0432	ABK2
abk2g01675	BA03G12160	BA04G12140	Poh0353360	Poh0329630	Poh0001920	Poh0018980		Hypnum@jg19978.t1		Entodon@jg2234.t1	Sc_g15943		CepurR40.9G080500		CepurGG1@9G061500.1		Pp3c11_2790	Pp3c7_21310		Pp3c2_34630	14	scaffold-HRWG-2015044-Buxbaumia_aphylla	cluster_0433	ABK2
abk2g01676	BA03G12170	BA04G12130	Poh0353350	Poh0329620	Poh0001930	Poh0018970		Hypnum@jg19979.t1		Entodon@jg2236.t1	Sc_g15944		CepurR40.9G080400		CepurGG1@9G061600.1		Pp3c11_2770	Pp3c7_21300	Pp3c1_1790		14	scaffold-AWOI-2072826-Diphyscium_foliosum	cluster_0434	ABK2
abk2g01677	BA03G12170	BA04G12130	Poh0353350	Poh0329620	Poh0001930	Poh0018970		Hypnum@jg19979.t1		Entodon@jg2236.t1	Sc_g15944		CepurR40.9G080400		CepurGG1@9G061600.1		Pp3c11_2770	Pp3c7_21300	Pp3c1_1790		14	scaffold-AWOI-2072826-Diphyscium_foliosum	cluster_0435	ABK2
abk2g01678	BA03G12170	BA04G12130	Poh0353350	Poh0329620	Poh0001930	Poh0018970		Hypnum@jg19979.t1		Entodon@jg2236.t1	Sc_g15944		CepurR40.9G080400		CepurGG1@9G061600.1		Pp3c11_2770	Pp3c7_21300	Pp3c1_1790		14	scaffold-AWOI-2072826-Diphyscium_foliosum	cluster_0436	ABK2
abk2g01679	BA03G12170	BA04G12130	Poh0353350	Poh0329620	Poh0001930	Poh0018970		Hypnum@jg19979.t1		Entodon@jg2236.t1	Sc_g15944		CepurR40.9G080400		CepurGG1@9G061600.1		Pp3c11_2770	Pp3c7_21300	Pp3c1_1790		14	scaffold-AWOI-2072826-Diphyscium_foliosum	cluster_0437	ABK2
abk2g01680	BA03G12170	BA04G12130	Poh0353350	Poh0329620	Poh0001930	Poh0018970		Hypnum@jg19979.t1		Entodon@jg2236.t1	Sc_g15944		CepurR40.9G080400		CepurGG1@9G061600.1		Pp3c11_2770	Pp3c7_21300	Pp3c1_1790		14	scaffold-AWOI-2072826-Diphyscium_foliosum	cluster_0438	ABK2
abk2g01681	BA03G12160	BA04G12140	Poh0353360	Poh0329630	Poh0001920	Poh0018980		Hypnum@jg19978.t1		Entodon@jg2234.t1	Sc_g15943		CepurR40.9G080500		CepurGG1@9G061500.1		Pp3c11_2790	Pp3c7_21310		Pp3c2_34630	14	scaffold-HRWG-2015044-Buxbaumia_aphylla	cluster_0439	ABK2
abk2g01686	BA03G13170		Poh0353220	Poh0329470			Hypnum@jg3981.t1		Entodon@jg20225.t1		Sc_g15951		CepurR40.9G082300		CepurGG1@9G059200.1		Pp3c11_2840		Pp3c1_1320		10	#N/A	cluster_0440	ABK2
abk2g01687	BA03G13170		Poh0353220	Poh0329470			Hypnum@jg3981.t1		Entodon@jg20225.t1		Sc_g15951		CepurR40.9G082300		CepurGG1@9G059200.1		Pp3c11_2840		Pp3c1_1320		10	#N/A	cluster_0441	ABK2
abk2g01688	BA03G13160	BA04G12230	Poh0353260	Poh0329520			Hypnum@jg3978.t1	Hypnum@jg19998.t1	Entodon@jg20227.t1	Entodon@jg2249.t1	Sc_g15957		CepurR40.9G081400		CepurGG1@9G060100.1		Pp3c11_2830	Pp3c7_20950	Pp3c1_1390	Pp3c2_34820	15	scaffold-AWOI-2073415-Diphyscium_foliosum	cluster_0442	ABK2
abk2g01692	BA03G13160	BA04G12230	Poh0353250	Poh0329520			Hypnum@jg3979.t1	Hypnum@jg19998.t1	Entodon@jg20227.t1	Entodon@jg2249.t1	Sc_g15957		CepurR40.9G081400		CepurGG1@9G060100.1		Pp3c11_2830	Pp3c7_20950	Pp3c1_1390	Pp3c2_34820	15	scaffold-AWOI-2073415-Diphyscium_foliosum	cluster_0443	ABK2
abk2g01693	BA03G13160	BA04G12230	Poh0353250	Poh0329520			Hypnum@jg3978.t1	Hypnum@jg19998.t1	Entodon@jg20227.t1	Entodon@jg2249.t1	Sc_g15957		CepurR40.9G081400		CepurGG1@9G060100.1		Pp3c11_3050	Pp3c7_21030	Pp3c1_1390	Pp3c2_34820	15	scaffold-AWOI-2073415-Diphyscium_foliosum	cluster_0444	ABK2
abk2g01694	BA03G13180	BA04G12230	Poh0353240	Poh0329490			Hypnum@jg3983.t1	Hypnum@jg19998.t1	Entodon@jg20222.t1	Entodon@jg2249.t1	Sc_g15957		CepurR40.9G081400		CepurGG1@9G060100.1		Pp3c11_3050	Pp3c7_21030	Pp3c1_1390	Pp3c2_34820	15	scaffold-AWOI-2073415-Diphyscium_foliosum	cluster_0445	ABK2
abk2g01695	BA03G13160	BA04G12230	Poh0353260	Poh0329530			Hypnum@jg3978.t1	Hypnum@jg19998.t1	Entodon@jg20227.t1	Entodon@jg2249.t1	Sc_g15957		CepurR40.9G081400		CepurGG1@9G060100.1		Pp3c11_2830	Pp3c7_21030	Pp3c1_1390	Pp3c2_34820	15	scaffold-AWOI-2073415-Diphyscium_foliosum	cluster_0446	ABK2
abk2g01706	BA03G13210	BA04G12340	Poh0353210	Poh0329460			Hypnum@jg3988.t1	Hypnum@jg20012.t1	Entodon@jg20220.t1	Entodon@jg2263.t1	Sc_g15958		CepurR40.9G083300		CepurGG1@9G057900.1		Pp3c11_2880	Pp3c7_20910			13	scaffold-HRWG-2003384-Buxbaumia_aphylla	cluster_0447	ABK2
abk2g01711	BA03G13210	BA04G12340	Poh0353210	Poh0329460			Hypnum@jg3988.t1	Hypnum@jg20012.t1	Entodon@jg20220.t1	Entodon@jg2263.t1	Sc_g15958		CepurR40.9G083300		CepurGG1@9G057900.1		Pp3c11_2880	Pp3c7_20910			13	scaffold-HRWG-2003384-Buxbaumia_aphylla	cluster_0448	ABK2
abk2g01719	BA03G12110	BA04G12150	Poh0018990	Poh0001910	Poh0329680	Poh0353420	Hypnum@jg19974.t1	Hypnum@jg3957.t1	Entodon@jg20247.t1	Entodon@jg2229.t1	Sc_g15940				CepurGG1@9G061100.1		Pp3c11_2940	Pp3c7_21380	Pp3c1_1800		15	scaffold-AWOI-2063865-Diphyscium_foliosum	cluster_0449	ABK2
abk2g01722	BA03G12110	BA04G12150	Poh0018990	Poh0001910	Poh0329680	Poh0353420	Hypnum@jg19974.t1	Hypnum@jg3957.t1	Entodon@jg20247.t1	Entodon@jg2229.t1	Sc_g15940				CepurGG1@9G062200.1		Pp3c11_2940	Pp3c7_21380	Pp3c1_1800		15	scaffold-AWOI-2063865-Diphyscium_foliosum	cluster_0450	ABK2
abk2g01726		BA04G12050	Poh0019040	Poh0001860	Poh0329710	Poh0353450	Hypnum@jg19968.t1			Entodon@jg2224.t1		Sc_g15619	CepurR40.9G124400			CepurGG1@9G167000.1		Pp3c7_21950			11	scaffold-AWOI-2013010-Diphyscium_foliosum	cluster_0451	ABK2
abk2g01739	BA03G12110	BA04G12150	Poh0018990	Poh0001910	Poh0329680	Poh0353420	Hypnum@jg19974.t1	Hypnum@jg3957.t1	Entodon@jg20247.t1	Entodon@jg2229.t1	Sc_g15940				CepurGG1@9G062200.1		Pp3c11_3090	Pp3c7_21380	Pp3c1_1800		15	scaffold-AWOI-2063865-Diphyscium_foliosum	cluster_0452	ABK2
abk2g01764	BA04G13320		Poh0017550	Poh0003460			Hypnum@jg19593.t1		Entodon@jg1862.t1		Sc_g15648		CepurR40.9G141300		CepurGG1@9G150100.1		Pp3c11_3690	Pp3c7_23800			10	scaffold-AWOI-2002245-Diphyscium_foliosum	cluster_0453	ABK2
abk2g01767	BA04G13320		Poh0017550	Poh0003460			Hypnum@jg19593.t1		Entodon@jg1862.t1		Sc_g15648		CepurR40.9G141300		CepurGG1@9G150100.1		Pp3c11_3690	Pp3c7_23800			10	scaffold-AWOI-2002245-Diphyscium_foliosum	cluster_0454	ABK2
abk2g01794			Poh0353930	Poh0173220	Poh0017870	Poh0003070	Hypnum@jg3896.t1	Hypnum@jg19719.t1	Entodon@jg20310.t1	Entodon@jg1989.t1	Sc_g15561		CepurR40.9G180600		CepurGG1@9G177600.1		Pp3c11_4150		Pp3c1_3300		13	scaffold-AWOI-2072339-Diphyscium_foliosum	cluster_0455	ABK2
abk2g01798			Poh0353930	Poh0173210	Poh0017870	Poh0003070	Hypnum@jg3896.t1	Hypnum@jg19719.t1	Entodon@jg20310.t1	Entodon@jg1989.t1	Sc_g15561		CepurR40.9G180600		CepurGG1@9G177800.1		Pp3c11_4200		Pp3c1_3300		13	scaffold-AWOI-2072339-Diphyscium_foliosum	cluster_0456	ABK2
abk2g01811	BA03G10860		Poh0353980	Poh0173180			Hypnum@jg3892.t1		Entodon@jg20316.t1		Sc_g15560		CepurR40.9G181000		CepurGG1@9G178000.1		Pp3c11_4620		Pp3c1_3310		10	scaffold-AWOI-2013388-Diphyscium_foliosum	cluster_0457	ABK2
abk2g01818	BA03G10770	BA04G11730			Poh0017850	Poh0003090	Hypnum@jg3873.t1	Hypnum@jg19702.t1	Entodon@jg20340.t1	Entodon@jg1975.t1			CepurR40.9G183600		CepurGG1@9G180200.1		Pp3c11_4740				11	scaffold-AWOI-2014894-Diphyscium_foliosum	cluster_0458	ABK2
abk2g01823	BA03G10790	BA04G11710	Poh0354040	Poh0173120	Poh0017830	Poh0003110	Hypnum@jg3883.t1	Hypnum@jg19700.t1	Entodon@jg20326.t1	Entodon@jg1973.t1							Pp3c11_4820	Pp3c7_22590			12	scaffold-HRWG-2016935-Buxbaumia_aphylla	cluster_0459	ABK2
abk2g01825		BA04G11750			Poh0017860	Poh0003080	Hypnum@jg3885.t1	Hypnum@jg19708.t1		Entodon@jg1981.t1	Sc_g15564		CepurR40.9G182700		CepurGG1@9G179400.1		Pp3c11_4840				10	scaffold-HRWG-2070555-Buxbaumia_aphylla	cluster_0460	ABK2
abk2g01851	BA03G08800	BA04G10970	Poh0001130	Poh0138080	Poh0019740	Poh0169340	Hypnum@jg19938.t1		Entodon@jg2203.t1	Entodon@jg20878.t1	Sc_g15879				CepurGG1@9G160900.1		Pp3c11_5070				12	scaffold-AWOI-2069309-Diphyscium_foliosum	cluster_0461	ABK2
abk2g01861	BA03G08720	BA04G11030	Poh0001200	Poh0138040	Poh0019690	Poh0169390	Hypnum@jg19930.t1		Entodon@jg2196.t1	Entodon@jg20886.t1	Sc_g15870		CepurR40.9G133400		CepurGG1@9G159600.1		Pp3c11_5110				13	scaffold-HRWG-2011056-Buxbaumia_aphylla	cluster_0462	ABK2
abk2g01866		BA04G11030	Poh0001200		Poh0019690		Hypnum@jg19930.t1		Entodon@jg2196.t1	Entodon@jg20886.t1	Sc_g15870		CepurR40.9G133400		CepurGG1@9G159600.1		Pp3c11_5110				10	scaffold-HRWG-2011056-Buxbaumia_aphylla	cluster_0463	ABK2
abk2g01867	BA03G08560		Poh0001250	Poh0137980	Poh0019620	Poh0169430	Hypnum@jg19926.t1		Entodon@jg2192.t1	Entodon@jg20888.t1							Pp3c11_5130	Pp3c7_23720			10	#N/A	cluster_0464	ABK2
abk2g01868		BA04G11030	Poh0001200		Poh0019690	Poh0169390	Hypnum@jg19930.t1		Entodon@jg2196.t1	Entodon@jg20886.t1	Sc_g15870		CepurR40.9G133400		CepurGG1@9G159600.1		Pp3c11_5110				11	scaffold-HRWG-2011056-Buxbaumia_aphylla	cluster_0465	ABK2
abk2g01869	BA03G08560		Poh0001250	Poh0137980	Poh0019620	Poh0169430	Hypnum@jg19926.t1		Entodon@jg2192.t1	Entodon@jg20888.t1							Pp3c11_5130	Pp3c7_23720			10	#N/A	cluster_0466	ABK2
abk2g01871	BA03G08560		Poh0001250	Poh0137980	Poh0019620	Poh0169430	Hypnum@jg19926.t1		Entodon@jg2192.t1	Entodon@jg20888.t1							Pp3c11_5140	Pp3c7_23710			10	#N/A	cluster_0467	ABK2
abk2g01872	BA03G08560		Poh0001250	Poh0137980	Poh0019620	Poh0169430	Hypnum@jg19926.t1		Entodon@jg2192.t1	Entodon@jg20888.t1							Pp3c11_5130	Pp3c7_23720			10	#N/A	cluster_0468	ABK2
abk2g01873	BA03G08560		Poh0001250	Poh0137980	Poh0019620	Poh0169430	Hypnum@jg19926.t1		Entodon@jg2192.t1	Entodon@jg20888.t1							Pp3c11_5140	Pp3c7_23710			10	#N/A	cluster_0469	ABK2
abk2g01877	BA03G08560		Poh0001250	Poh0137980	Poh0019620	Poh0169430	Hypnum@jg19926.t1		Entodon@jg2192.t1	Entodon@jg20888.t1							Pp3c11_5130	Pp3c7_23720			10	#N/A	cluster_0470	ABK2
abk2g01879	BA03G08600		Poh0001270	Poh0137930	Poh0019610	Poh0169480	Hypnum@jg19919.t1		Entodon@jg2187.t1	Entodon@jg20897.t1	Sc_g15868		CepurR40.9G134000		CepurGG1@9G159000.1		Pp3c11_5240	Pp3c7_23690			13	scaffold-AWOI-2008486-Diphyscium_foliosum	cluster_0471	ABK2
abk2g01880	BA03G08600		Poh0001270	Poh0137930	Poh0019610	Poh0169480	Hypnum@jg19919.t1		Entodon@jg2187.t1	Entodon@jg20897.t1	Sc_g15868		CepurR40.9G134000		CepurGG1@9G159000.1		Pp3c11_5240	Pp3c7_23690			13	scaffold-AWOI-2008486-Diphyscium_foliosum	cluster_0472	ABK2
abk2g01881	BA03G08600		Poh0001270	Poh0137930	Poh0019610	Poh0169480	Hypnum@jg19919.t1		Entodon@jg2187.t1	Entodon@jg20897.t1	Sc_g15868		CepurR40.9G134000		CepurGG1@9G159000.1		Pp3c11_5240	Pp3c7_23690			13	scaffold-AWOI-2008486-Diphyscium_foliosum	cluster_0473	ABK2
abk2g01882	BA03G08600		Poh0001270	Poh0137930	Poh0019610	Poh0169480	Hypnum@jg19919.t1		Entodon@jg2187.t1	Entodon@jg20897.t1	Sc_g15868		CepurR40.9G134000		CepurGG1@9G159000.1		Pp3c11_5240	Pp3c7_23690	Pp3c1_4490		14	scaffold-AWOI-2008486-Diphyscium_foliosum	cluster_0474	ABK2
abk2g01883	BA03G08600		Poh0001270	Poh0137930	Poh0019610	Poh0169480	Hypnum@jg19919.t1		Entodon@jg2187.t1	Entodon@jg20897.t1	Sc_g15868		CepurR40.9G134000		CepurGG1@9G159000.1		Pp3c11_5240	Pp3c7_23690	Pp3c1_4490		14	scaffold-AWOI-2008486-Diphyscium_foliosum	cluster_0475	ABK2
abk2g01884			Poh0001240	Poh0137940	Poh0019630	Poh0169470	Hypnum@jg19921.t1		Entodon@jg2188.t1	Entodon@jg20896.t1			CepurR40.9G133900		CepurGG1@9G159100.1		Pp3c11_5230		Pp3c1_4470		11	scaffold-HRWG-2013891-Buxbaumia_aphylla	cluster_0476	ABK2
abk2g01890			Poh0001240	Poh0137940	Poh0019630	Poh0169470	Hypnum@jg19921.t1		Entodon@jg2188.t1	Entodon@jg20896.t1			CepurR40.9G133900		CepurGG1@9G159100.1		Pp3c11_5230		Pp3c1_4470		11	scaffold-HRWG-2013891-Buxbaumia_aphylla	cluster_0477	ABK2
abk2g01891			Poh0001290		Poh0019600		Hypnum@jg19917.t1		Entodon@jg2185.t1		Sc_g15875		CepurR40.9G134500		CepurGG1@9G158400.1		Pp3c11_5250	Pp3c7_23670	Pp3c1_4510		10	scaffold-AWOI-2070640-Diphyscium_foliosum	cluster_0478	ABK2
abk2g01892			Poh0001240	Poh0137940	Poh0019630	Poh0169470	Hypnum@jg19921.t1		Entodon@jg2188.t1	Entodon@jg20896.t1			CepurR40.9G133900		CepurGG1@9G159100.1		Pp3c11_5230		Pp3c1_4470		11	scaffold-HRWG-2013891-Buxbaumia_aphylla	cluster_0479	ABK2
abk2g01894			Poh0001240	Poh0137940	Poh0019630	Poh0169470	Hypnum@jg19921.t1		Entodon@jg2188.t1	Entodon@jg20896.t1			CepurR40.9G133900		CepurGG1@9G159100.1		Pp3c11_5230		Pp3c1_4470		11	scaffold-HRWG-2013891-Buxbaumia_aphylla	cluster_0480	ABK2
abk2g01895			Poh0001240	Poh0137940	Poh0019630	Poh0169470	Hypnum@jg19921.t1		Entodon@jg2188.t1	Entodon@jg20896.t1			CepurR40.9G133900		CepurGG1@9G159100.1		Pp3c11_5230		Pp3c1_4470		11	scaffold-HRWG-2013891-Buxbaumia_aphylla	cluster_0481	ABK2
abk2g01898			Poh0001270	Poh0137930	Poh0019610	Poh0169480	Hypnum@jg19919.t1		Entodon@jg2187.t1	Entodon@jg20897.t1	Sc_g15868		CepurR40.9G134000		CepurGG1@9G159000.1		Pp3c11_5240	Pp3c7_23690	Pp3c1_4490		13	scaffold-AWOI-2008486-Diphyscium_foliosum	cluster_0482	ABK2
abk2g01902			Poh0001270	Poh0137930	Poh0019610	Poh0169480	Hypnum@jg19919.t1		Entodon@jg2187.t1	Entodon@jg20897.t1	Sc_g15868		CepurR40.9G134000		CepurGG1@9G159000.1		Pp3c11_5240	Pp3c7_23690	Pp3c1_4490		13	scaffold-AWOI-2008486-Diphyscium_foliosum	cluster_0483	ABK2
abk2g01903	BA03G13670	BA04G13540	Poh0187750	Poh0208200			Hypnum@jg19547.t1	Hypnum@jg5467.t1					CepurR40.9G134900		CepurGG1@9G158000.1		Pp3c11_5280		Pp3c1_4600		10	scaffold-AWOI-2070876-Diphyscium_foliosum	cluster_0484	ABK2
abk2g01904			Poh0001290	Poh0208230	Poh0019600		Hypnum@jg19917.t1		Entodon@jg2185.t1		Sc_g15875		CepurR40.9G134500		CepurGG1@9G158400.1		Pp3c11_5250	Pp3c7_23670	Pp3c1_4510		11	scaffold-AWOI-2070640-Diphyscium_foliosum	cluster_0485	ABK2
abk2g01912	BA03G13680	BA04G13550	Poh0187760	Poh0208190			Hypnum@jg19545.t1	Hypnum@jg5469.t1			Sc_g15862		CepurR40.9G135100		CepurGG1@9G157800.1		Pp3c11_5330				10	scaffold-HRWG-2005016-Buxbaumia_aphylla	cluster_0486	ABK2
abk2g01913	BA03G13670	BA04G13540	Poh0187750	Poh0208200			Hypnum@jg19547.t1	Hypnum@jg5467.t1					CepurR40.9G134900		CepurGG1@9G158000.1		Pp3c11_5280		Pp3c1_4600		10	scaffold-AWOI-2070876-Diphyscium_foliosum	cluster_0487	ABK2
abk2g01915	BA03G13670	BA04G13540	Poh0187750	Poh0208200			Hypnum@jg19547.t1	Hypnum@jg5467.t1					CepurR40.9G134900		CepurGG1@9G158000.1		Pp3c11_5280		Pp3c1_4600		10	scaffold-AWOI-2070876-Diphyscium_foliosum	cluster_0488	ABK2
abk2g01916	BA03G13670	BA04G13540	Poh0187750	Poh0208200			Hypnum@jg19547.t1	Hypnum@jg5467.t1					CepurR40.9G134900		CepurGG1@9G158000.1		Pp3c11_5280		Pp3c1_4600		10	scaffold-AWOI-2070876-Diphyscium_foliosum	cluster_0489	ABK2
abk2g01917	BA03G13680	BA04G13550	Poh0187760	Poh0208190			Hypnum@jg19545.t1	Hypnum@jg5469.t1			Sc_g15862		CepurR40.9G135100		CepurGG1@9G157800.1		Pp3c11_5330				10	scaffold-HRWG-2005016-Buxbaumia_aphylla	cluster_0490	ABK2
abk2g01926	BA03G13590	BA04G13630	Poh0187800	Poh0208150			Hypnum@jg19559.t1	Hypnum@jg5454.t1					CepurR40.9G135500		CepurGG1@9G157400.1		Pp3c11_5410	Pp3c7_23490	Pp3c1_4970		11	scaffold-AWOI-2071485-Diphyscium_foliosum	cluster_0491	ABK2
abk2g01927	BA03G13590	BA04G13630	Poh0187800	Poh0208150			Hypnum@jg19559.t1	Hypnum@jg5454.t1					CepurR40.9G135500		CepurGG1@9G157400.1		Pp3c11_5410	Pp3c7_23490	Pp3c1_4970		11	scaffold-AWOI-2071485-Diphyscium_foliosum	cluster_0492	ABK2
abk2g01928	BA03G13590	BA04G13630	Poh0187800	Poh0208160			Hypnum@jg19557.t1	Hypnum@jg5457.t1					CepurR40.9G135500		CepurGG1@9G157300.1		Pp3c11_5420	Pp3c7_23450	Pp3c1_4970		11	scaffold-AWOI-2071485-Diphyscium_foliosum	cluster_0493	ABK2
abk2g01929	BA03G13590	BA04G13630	Poh0187800	Poh0208150			Hypnum@jg19559.t1	Hypnum@jg5454.t1					CepurR40.9G135500		CepurGG1@9G157400.1		Pp3c11_5410	Pp3c7_23490	Pp3c1_4970		11	scaffold-AWOI-2071485-Diphyscium_foliosum	cluster_0494	ABK2
abk2g01930	BA03G13590	BA04G13630	Poh0187800	Poh0208150			Hypnum@jg19559.t1	Hypnum@jg5454.t1					CepurR40.9G135500		CepurGG1@9G157400.1		Pp3c11_5410	Pp3c7_23490	Pp3c1_4970		11	scaffold-AWOI-2071485-Diphyscium_foliosum	cluster_0495	ABK2
abk2g01931	BA03G13600	BA04G13630	Poh0187790	Poh0208160			Hypnum@jg19557.t1	Hypnum@jg5457.t1					CepurR40.9G135500		CepurGG1@9G157300.1		Pp3c11_5420	Pp3c7_23450	Pp3c1_4970		11	scaffold-AWOI-2005040-Diphyscium_foliosum	cluster_0496	ABK2
abk2g01932	BA03G13600	BA04G13630	Poh0187800	Poh0208160			Hypnum@jg19557.t1	Hypnum@jg5457.t1					CepurR40.9G135500		CepurGG1@9G157300.1		Pp3c11_5420	Pp3c7_23450	Pp3c1_4970		11	scaffold-AWOI-2005040-Diphyscium_foliosum	cluster_0497	ABK2
abk2g01960	BA03G05900		Poh0168570	Poh0136510			Hypnum@jg4329.t1		Entodon@jg19911.t1			Sc_g15535	CepurR40.9G065700		CepurGG1@9G175500.1			Pp3c7_22250	Pp3c2_29720		10	scaffold-AWOI-2014851-Diphyscium_foliosum	cluster_0498	ABK2
abk2g01962	BA03G05840		Poh0168530	Poh0136470			Hypnum@jg4321.t1		Entodon@jg19914.t1				CepurR40.9G064500		CepurGG1@9G174400.1		Pp3c11_5740	Pp3c7_22740	Pp3c2_29800		10	scaffold-AWOI-2011006-Diphyscium_foliosum	cluster_0499	ABK2
abk2g02024	BA03G10050		Poh0186950	Poh0208800			Hypnum@jg5790.t1		Entodon@jg18558.t1		Sc_g15819		CepurR40.9G121500		CepurGG1@9G169300.1		Pp3c11_6360		Pp3c2_31590		10	scaffold-AWOI-2014038-Diphyscium_foliosum	cluster_0500	ABK2
abk2g02025	BA03G10050		Poh0186950	Poh0208800			Hypnum@jg5790.t1		Entodon@jg18558.t1		Sc_g15819		CepurR40.9G121500		CepurGG1@9G169300.1		Pp3c11_6360		Pp3c2_31590		10	scaffold-AWOI-2014038-Diphyscium_foliosum	cluster_0501	ABK2
abk2g02027	BA03G10050		Poh0186950	Poh0208800			Hypnum@jg5790.t1	Hypnum@jg18660.t1	Entodon@jg18558.t1	Entodon@jg1087.t1	Sc_g15819		CepurR40.9G121500		CepurGG1@9G169300.1		Pp3c11_6360		Pp3c2_31590		12	scaffold-AWOI-2014038-Diphyscium_foliosum	cluster_0502	ABK2
abk2g02033	BA03G10050	BA04G20130	Poh0186950	Poh0208800			Hypnum@jg5790.t1	Hypnum@jg18660.t1	Entodon@jg18558.t1	Entodon@jg1087.t1	Sc_g15819		CepurR40.9G121500		CepurGG1@9G169300.1		Pp3c11_6360		Pp3c2_31590		13	scaffold-AWOI-2014038-Diphyscium_foliosum	cluster_0503	ABK2
abk2g02036	BA03G10050	BA04G20130	Poh0186950	Poh0208800			Hypnum@jg5790.t1	Hypnum@jg18660.t1	Entodon@jg18558.t1	Entodon@jg1087.t1	Sc_g15819		CepurR40.9G121500		CepurGG1@9G169300.1		Pp3c11_6360		Pp3c2_31590		13	scaffold-AWOI-2014038-Diphyscium_foliosum	cluster_0504	ABK2
abk2g02037	BA03G10050	BA04G20130	Poh0186950	Poh0208800			Hypnum@jg5790.t1	Hypnum@jg18660.t1	Entodon@jg18558.t1	Entodon@jg1087.t1	Sc_g15819		CepurR40.9G121500		CepurGG1@9G169300.1		Pp3c11_6360		Pp3c2_31590		13	scaffold-AWOI-2014038-Diphyscium_foliosum	cluster_0505	ABK2
abk2g02041	BA03G10050	BA04G20130	Poh0186950	Poh0208800			Hypnum@jg5790.t1	Hypnum@jg18660.t1	Entodon@jg18558.t1	Entodon@jg1087.t1	Sc_g15819		CepurR40.9G121500		CepurGG1@9G169300.1		Pp3c11_6360		Pp3c2_31590		13	scaffold-AWOI-2014038-Diphyscium_foliosum	cluster_0506	ABK2
abk2g02043	BA03G10020	BA04G20160	Poh0186980	Poh0208770			Hypnum@jg5793.t1	Hypnum@jg18680.t1	Entodon@jg18555.t1	Entodon@jg1102.t1	Sc_g15822		CepurR40.9G122700		CepurGG1@9G168600.1		Pp3c11_6420	Pp3c7_25660	Pp3c2_31540	Pp3c1_7160	15	scaffold-AWOI-2002996-Diphyscium_foliosum	cluster_0507	ABK2
abk2g02064	BA03G09810	BA04G12620	Poh0187040	Poh0208730	Poh0022260	Poh0371810							CepurR40.9G111000		CepurGG1@9G125400.1		Pp3c11_6890	Pp3c7_26350			10	scaffold-AWOI-2010099-Diphyscium_foliosum	cluster_0508	ABK2
abk2g02065	BA03G09800	BA04G12610			Poh0022250	Poh0371820	Hypnum@jg20052.t1		Entodon@jg2303.t1				CepurR40.9G111100		CepurGG1@9G125500.1		Pp3c11_6970		Pp3c2_31820		10	scaffold-HRWG-2011270-Buxbaumia_aphylla	cluster_0509	ABK2
abk2g02067	BA03G09800	BA04G12610			Poh0022250	Poh0371820	Hypnum@jg20052.t1		Entodon@jg2303.t1				CepurR40.9G111100		CepurGG1@9G125500.1		Pp3c11_6970		Pp3c2_31820		10	scaffold-HRWG-2011270-Buxbaumia_aphylla	cluster_0510	ABK2
abk2g02073	BA03G09790	BA04G12670	Poh0187060	Poh0208710	Poh0022290	Poh0371780	Hypnum@jg20061.t1		Entodon@jg2308.t1				CepurR40.9G110300		CepurGG1@9G124900.1		Pp3c11_7140				11	scaffold-AWOI-2013529-Diphyscium_foliosum	cluster_0511	ABK2
abk2g02074	BA03G09790	BA04G12670	Poh0187060	Poh0208710	Poh0022290	Poh0371780	Hypnum@jg20061.t1		Entodon@jg2308.t1				CepurR40.9G110300		CepurGG1@9G124900.1		Pp3c11_7140				11	scaffold-AWOI-2013529-Diphyscium_foliosum	cluster_0512	ABK2
abk2g02080	BA03G09790	BA04G12670	Poh0187060	Poh0208710	Poh0022290	Poh0371780	Hypnum@jg20061.t1		Entodon@jg2308.t1				CepurR40.9G110300		CepurGG1@9G124900.1		Pp3c11_7140	Pp3c7_26110			12	scaffold-AWOI-2013529-Diphyscium_foliosum	cluster_0513	ABK2
abk2g02082	BA03G09780	BA04G12680	Poh0187070	Poh0208700	Poh0022300	Poh0371770	Hypnum@jg20063.t1		Entodon@jg2310.t1				CepurR40.9G110200		CepurGG1@9G124800.1		Pp3c11_7220	Pp3c7_26040			12	scaffold-AWOI-2004891-Diphyscium_foliosum	cluster_0514	ABK2
abk2g02084	BA03G09770	BA04G12690	Poh0187080	Poh0208680	Poh0022310	Poh0371760	Hypnum@jg20066.t1		Entodon@jg2313.t1				CepurR40.9G110100		CepurGG1@9G124700.1		Pp3c11_7250	Pp3c7_26020			12	scaffold-AWOI-2071046-Diphyscium_foliosum	cluster_0515	ABK2
abk2g02083	BA03G09770	BA04G12690	Poh0187080	Poh0208680	Poh0022310	Poh0371760	Hypnum@jg20066.t1		Entodon@jg2313.t1				CepurR40.9G110100		CepurGG1@9G124700.1		Pp3c11_7230	Pp3c7_26020			12	scaffold-AWOI-2071046-Diphyscium_foliosum	cluster_0516	ABK2
abk2g02087	BA03G09870	BA04G12720	Poh0187100	Poh0208660	Poh0022330	Poh0371740	Hypnum@jg20071.t1		Entodon@jg2316.t1				CepurR40.9G109700		CepurGG1@9G124400.1		Pp3c11_7290				11	#N/A	cluster_0517	ABK2
abk2g02165		BA04G17300			Poh0111660	Poh0009230		Hypnum@jg19845.t1		Entodon@jg2117.t1	Sc_g16078		CepurR40.9G179100		CepurGG1@9G075000.1		Pp3c11_8570	Pp3c7_20600			10	scaffold-AWOI-2002476-Diphyscium_foliosum	cluster_0518	ABK2
abk2g02184	BA03G05640		Poh0169960	Poh0137370			Hypnum@jg3639.t1	Hypnum@jg19824.t1	Entodon@jg20550.t1	Entodon@jg2096.t1	Sc_g16051		CepurR40.9G173200		CepurGG1@9G080800.1		Pp3c11_8770				11	scaffold-AWOI-2003246-Diphyscium_foliosum	cluster_0519	ABK2
abk2g02186	BA03G05490		Poh0169960	Poh0137370			Hypnum@jg3639.t1	Hypnum@jg19824.t1	Entodon@jg20550.t1	Entodon@jg2096.t1	Sc_g16051		CepurR40.9G173200		CepurGG1@9G080800.1		Pp3c11_8770				11	scaffold-AWOI-2003246-Diphyscium_foliosum	cluster_0520	ABK2
abk2g02251	BA03G16740	BA04G16640	Poh0209320	Poh0186420	Poh0113340		Hypnum@jg19764.t1	Hypnum@jg4213.t1	Entodon@jg2034.t1	Entodon@jg20014.t1	Sc_g16278		CepurR40.9G164900		CepurGG1@9G091600.1		Pp3c11_9540	Pp3c7_18020	Pp3c1_3930		15	scaffold-AWOI-2072575-Diphyscium_foliosum	cluster_0521	ABK2
abk2g02252	BA03G16730	BA04G16650	Poh0209330	Poh0186410			Hypnum@jg19759.t1	Hypnum@jg4210.t1	Entodon@jg2030.t1	Entodon@jg20013.t1			CepurR40.9G164700		CepurGG1@9G091700.1		Pp3c11_9530				11	scaffold-HRWG-2012234-Buxbaumia_aphylla	cluster_0522	ABK2
abk2g02257	BA03G16730	BA04G16650	Poh0209330	Poh0186410			Hypnum@jg19759.t1	Hypnum@jg4210.t1	Entodon@jg2030.t1	Entodon@jg20013.t1			CepurR40.9G164700		CepurGG1@9G091700.1		Pp3c11_9530				11	scaffold-HRWG-2012234-Buxbaumia_aphylla	cluster_0523	ABK2
abk2g02258	BA03G16730	BA04G16650	Poh0209330	Poh0186410			Hypnum@jg19759.t1	Hypnum@jg4210.t1	Entodon@jg2030.t1	Entodon@jg20013.t1			CepurR40.9G164700		CepurGG1@9G091700.1		Pp3c11_9530				11	scaffold-HRWG-2012234-Buxbaumia_aphylla	cluster_0524	ABK2
abk2g02259	BA03G16730	BA04G16650	Poh0209330	Poh0186410			Hypnum@jg19759.t1	Hypnum@jg4210.t1	Entodon@jg2030.t1	Entodon@jg20013.t1			CepurR40.9G164700		CepurGG1@9G091700.1		Pp3c11_9530				11	scaffold-HRWG-2012234-Buxbaumia_aphylla	cluster_0525	ABK2
abk2g02260	BA03G16740	BA04G16640	Poh0209320	Poh0186420	Poh0113340	Poh0010710	Hypnum@jg19764.t1	Hypnum@jg4213.t1	Entodon@jg2034.t1	Entodon@jg20014.t1	Sc_g16278		CepurR40.9G164900		CepurGG1@9G091600.1		Pp3c11_9540	Pp3c7_18020	Pp3c1_3930		16	scaffold-AWOI-2072575-Diphyscium_foliosum	cluster_0526	ABK2
abk2g02265	BA03G16690	BA04G16580	Poh0209270		Poh0113320	Poh0010730	Hypnum@jg19766.t1	Hypnum@jg4218.t1	Entodon@jg2036.t1	Entodon@jg20009.t1	Sc_g16275		CepurR40.9G165300		CepurGG1@9G091000.1		Pp3c11_9580	Pp3c7_18000	Pp3c1_3940		15	#N/A	cluster_0527	ABK2
abk2g02272		BA04G16590			Poh0113310	Poh0010740	Hypnum@jg19768.t1		Entodon@jg2038.t1		Sc_g16274		CepurR40.9G165500		CepurGG1@9G090700.1		Pp3c11_9590	Pp3c7_17990	Pp3c1_3990		11	#N/A	cluster_0528	ABK2
abk2g02273	BA03G16690	BA04G16580	Poh0209270		Poh0113320	Poh0010730	Hypnum@jg19766.t1	Hypnum@jg4218.t1	Entodon@jg2036.t1	Entodon@jg20009.t1	Sc_g16275		CepurR40.9G165300		CepurGG1@9G091000.1		Pp3c11_9580	Pp3c7_18000	Pp3c1_3940		15	#N/A	cluster_0529	ABK2
abk2g02277		BA04G16580			Poh0113320	Poh0010730	Hypnum@jg19766.t1		Entodon@jg2036.t1		Sc_g16275		CepurR40.9G165300		CepurGG1@9G091000.1		Pp3c11_9580	Pp3c7_18000	Pp3c1_3940		11	#N/A	cluster_0530	ABK2
abk2g02278		BA04G16580			Poh0113320	Poh0010730	Hypnum@jg19766.t1		Entodon@jg2036.t1		Sc_g16275		CepurR40.9G165300		CepurGG1@9G091000.1		Pp3c11_9580	Pp3c7_18000	Pp3c1_3940		11	#N/A	cluster_0531	ABK2
abk2g02279		BA04G16580			Poh0113320	Poh0010730	Hypnum@jg19766.t1		Entodon@jg2036.t1		Sc_g16275		CepurR40.9G165300		CepurGG1@9G091000.1		Pp3c11_9580	Pp3c7_18000	Pp3c1_3940		11	#N/A	cluster_0532	ABK2
abk2g02280		BA04G16590			Poh0113310	Poh0010740	Hypnum@jg19768.t1		Entodon@jg2038.t1		Sc_g16274		CepurR40.9G165500		CepurGG1@9G090700.1		Pp3c11_9590	Pp3c7_17990	Pp3c1_3990		11	scaffold-HRWG-2017357-Buxbaumia_aphylla	cluster_0533	ABK2
abk2g02282		BA04G16690			Poh0113280	Poh0010780	Hypnum@jg19771.t1		Entodon@jg2042.t1		Sc_g16270		CepurR40.9G165800		CepurGG1@9G090300.1		Pp3c11_9630	Pp3c7_17970	Pp3c1_4030		11	scaffold-AWOI-2011996-Diphyscium_foliosum	cluster_0534	ABK2
abk2g02283		BA04G16690			Poh0113280	Poh0010780	Hypnum@jg19771.t1		Entodon@jg2042.t1		Sc_g16270		CepurR40.9G165800		CepurGG1@9G090300.1		Pp3c11_9630	Pp3c7_17970	Pp3c1_4030		11	scaffold-HRWG-2013300-Buxbaumia_aphylla	cluster_0535	ABK2
abk2g00040		BA03G07070	Poh0170260	Poh0137110			Hypnum@jg3658.t1		Entodon@jg20534.t1		Sc_g15968			CepurR40.9G099100		CepurGG1@9G114000.1	Pp3c11_10500	Pp3c7_16420			10	scaffold-AWOI-2014704-Diphyscium_foliosum	cluster_0536	ABK2
abk2g00106	BA04G15700	BA03G18570	Poh0205800	Poh0188510	Poh0109240	Poh0006770	Hypnum@jg4834.t1		Entodon@jg19441.t1				CepurR40.9G037800		CepurGG1@9G038900.1		Pp3c11_11790				11	scaffold-HRWG-2012633-Buxbaumia_aphylla	cluster_0537	ABK2
abk2g00134	BA03G07630		Poh0205820	Poh0188470	Poh0016760	Poh0004320	Hypnum@jg3237.t1		Entodon@jg20917.t1		Sc_g16491		CepurR40.9G017600		CepurGG1@9G017300.1		Pp3c11_12080	Pp3c7_12850	Pp3c1_16780		13	scaffold-AWOI-2071873-Diphyscium_foliosum	cluster_0538	ABK2
abk2g00151	BA03G07530		Poh0170970	Poh0139450	Poh0016880	Poh0004170					Sc_g16494		CepurR40.9G016700		CepurGG1@9G016500.1		Pp3c11_12290		Pp3c1_16820	Pp3c7_14170	11	scaffold-AWOI-2073749-Diphyscium_foliosum	cluster_0539	ABK2
abk2g00153	BA03G07530		Poh0170970	Poh0139450	Poh0016880	Poh0004170					Sc_g16494		CepurR40.9G016700		CepurGG1@9G016500.1		Pp3c11_12290		Pp3c1_16820	Pp3c7_14170	11	scaffold-AWOI-2073749-Diphyscium_foliosum	cluster_0540	ABK2
abk2g00156	BA03G07550		Poh0171010	Poh0139410			Hypnum@jg3247.t1		Entodon@jg20904.t1		Sc_g16495		CepurR40.9G016600		CepurGG1@9G016400.1		Pp3c11_12320		Pp3c1_16810	Pp3c7_14130	11	scaffold-AWOI-2004270-Diphyscium_foliosum	cluster_0541	ABK2
abk2g00161	BA03G07550		Poh0171010	Poh0139410			Hypnum@jg3247.t1		Entodon@jg20904.t1		Sc_g16495		CepurR40.9G016600		CepurGG1@9G016400.1		Pp3c11_12320		Pp3c1_16810	Pp3c7_14130	11	scaffold-AWOI-2004269-Diphyscium_foliosum	cluster_0542	ABK2
abk2g00269			Poh0109780	Poh0007370	Poh0170580		Hypnum@jg3336.t1	Hypnum@jg19019.t1	Entodon@jg20817.t1	Entodon@jg1291.t1			CepurR40.9G076700		CepurGG1@9G065100.1		Pp3c11_14160		Pp3c1_7870		11	scaffold-AWOI-2005374-Diphyscium_foliosum	cluster_0543	ABK2
abk2g00282	BA04G17630		Poh0109670	Poh0007240	Poh0170620		Hypnum@jg3328.t1	Hypnum@jg19040.t1	Entodon@jg20823.t1	Entodon@jg1309.t1			CepurR40.9G075100		CepurGG1@9G066600.1		Pp3c11_14270		Pp3c1_7900		12	scaffold-AWOI-2006790-Diphyscium_foliosum	cluster_0544	ABK2
abk2g00284	BA04G17630		Poh0109670	Poh0007240	Poh0170620		Hypnum@jg3328.t1	Hypnum@jg19040.t1	Entodon@jg20823.t1	Entodon@jg1309.t1			CepurR40.9G075100		CepurGG1@9G066600.1		Pp3c11_14270		Pp3c1_7900		12	scaffold-AWOI-2006790-Diphyscium_foliosum	cluster_0545	ABK2
abk2g00285	BA04G17640		Poh0109680	Poh0007250			Hypnum@jg3331.t1	Hypnum@jg19039.t1	Entodon@jg20820.t1	Entodon@jg1308.t1			CepurR40.9G075200		CepurGG1@9G066400.1		Pp3c11_14260	Pp3c7_18900			11	scaffold-HRWG-2016532-Buxbaumia_aphylla	cluster_0546	ABK2
abk2g00291	BA04G17640		Poh0109680	Poh0007250			Hypnum@jg3331.t1	Hypnum@jg19039.t1	Entodon@jg20820.t1	Entodon@jg1308.t1			CepurR40.9G075200		CepurGG1@9G066400.1		Pp3c11_14260	Pp3c7_18900			11	scaffold-HRWG-2016532-Buxbaumia_aphylla	cluster_0547	ABK2
abk2g00292	BA04G17640		Poh0109680	Poh0007250			Hypnum@jg3331.t1	Hypnum@jg19039.t1	Entodon@jg20820.t1	Entodon@jg1308.t1			CepurR40.9G075200		CepurGG1@9G066400.1		Pp3c11_14260	Pp3c7_18900			11	scaffold-HRWG-2016532-Buxbaumia_aphylla	cluster_0548	ABK2
abk2g00293	BA04G17640		Poh0109680	Poh0007250			Hypnum@jg3331.t1	Hypnum@jg19039.t1	Entodon@jg20820.t1	Entodon@jg1308.t1			CepurR40.9G075200		CepurGG1@9G066400.1		Pp3c11_14260	Pp3c7_18900			11	scaffold-HRWG-2016532-Buxbaumia_aphylla	cluster_0549	ABK2
abk2g00295	BA04G17630	BA03G06880	Poh0109670	Poh0007240	Poh0170620		Hypnum@jg3328.t1	Hypnum@jg19040.t1	Entodon@jg20823.t1	Entodon@jg1309.t1			CepurR40.9G075100		CepurGG1@9G066600.1		Pp3c11_14270		Pp3c1_7900		13	scaffold-AWOI-2006790-Diphyscium_foliosum	cluster_0550	ABK2
abk2g00298	BA04G17630	BA03G06880	Poh0109670	Poh0007240	Poh0170620		Hypnum@jg3328.t1	Hypnum@jg19040.t1	Entodon@jg20823.t1	Entodon@jg1309.t1			CepurR40.9G075100		CepurGG1@9G066600.1		Pp3c11_14270		Pp3c1_7900		13	scaffold-AWOI-2006790-Diphyscium_foliosum	cluster_0551	ABK2
abk2g00301	BA04G17670	BA03G06910			Poh0170640		Hypnum@jg3317.t1	Hypnum@jg19062.t1	Entodon@jg20830.t1	Entodon@jg1324.t1			CepurR40.9G072900		CepurGG1@9G068500.1		Pp3c11_14370	Pp3c7_19260	Pp3c1_8080		12	scaffold-AWOI-2073005-Diphyscium_foliosum	cluster_0552	ABK2
abk2g00326		BA03G08640	Poh0137880		Poh0169550		Hypnum@jg19184.t1	Hypnum@jg4674.t1	Entodon@jg1471.t1	Entodon@jg19598.t1	Sc_g16229					CepurGG1@9G104200.1	Pp3c11_14870				10	scaffold-HRWG-2007670-Buxbaumia_aphylla	cluster_0553	ABK2
abk2g00327		BA03G08640	Poh0137880		Poh0169550		Hypnum@jg19181.t1	Hypnum@jg4676.t1	Entodon@jg1473.t1	Entodon@jg19598.t1	Sc_g16229					CepurGG1@9G104200.1	Pp3c11_14880				10	scaffold-HRWG-2007670-Buxbaumia_aphylla	cluster_0554	ABK2
abk2g00328		BA03G08650	Poh0137880		Poh0169540		Hypnum@jg19186.t1	Hypnum@jg4676.t1	Entodon@jg1471.t1	Entodon@jg19597.t1	Sc_g16228					CepurGG1@9G104300.1	Pp3c11_14870				10	scaffold-HRWG-2007670-Buxbaumia_aphylla	cluster_0555	ABK2
abk2g00329		BA03G08630	Poh0137860	Poh0006220	Poh0169520	Poh0108730	Hypnum@jg19211.t1	Hypnum@jg4674.t1	Entodon@jg1468.t1	Entodon@jg19594.t1	Sc_g16229		CepurR40.9G050600		CepurGG1@9G050100.1	CepurGG1@9G104400.1	Pp3c11_14880		Pp3c2_25930		15	scaffold-HRWG-2007670-Buxbaumia_aphylla	cluster_0556	ABK2
abk2g00330		BA03G08640	Poh0137880	Poh0006210	Poh0169550	Poh0108730	Hypnum@jg19184.t1	Hypnum@jg4674.t1	Entodon@jg1471.t1	Entodon@jg19598.t1	Sc_g16229		CepurR40.9G050500		CepurGG1@9G050000.1	CepurGG1@9G104400.1	Pp3c11_14880		Pp3c2_25930		15	scaffold-HRWG-2007670-Buxbaumia_aphylla	cluster_0557	ABK2
abk2g00331		BA03G08650	Poh0137880	Poh0006210	Poh0169540	Poh0108750	Hypnum@jg19186.t1	Hypnum@jg4676.t1	Entodon@jg1473.t1	Entodon@jg19597.t1	Sc_g16228		CepurR40.9G050500		CepurGG1@9G050000.1	CepurGG1@9G104300.1	Pp3c11_14870		Pp3c2_25930		15	scaffold-HRWG-2007670-Buxbaumia_aphylla	cluster_0558	ABK2
abk2g00334		BA03G08630	Poh0137900	Poh0006240	Poh0169510	Poh0108740	Hypnum@jg19211.t1	Hypnum@jg4674.t1	Entodon@jg1468.t1	Entodon@jg19593.t1	Sc_g16229		CepurR40.9G050600		CepurGG1@9G050100.1	CepurGG1@9G104400.1	Pp3c11_14880		Pp3c2_25930		15	scaffold-HRWG-2007670-Buxbaumia_aphylla	cluster_0559	ABK2
abk2g00335	BA04G16220	BA03G08630	Poh0137860	Poh0006210	Poh0169520	Poh0108730	Hypnum@jg19211.t1	Hypnum@jg4674.t1	Entodon@jg1470.t1	Entodon@jg19594.t1	Sc_g16228		CepurR40.9G050600		CepurGG1@9G050100.1	CepurGG1@9G104400.1	Pp3c11_14880		Pp3c2_25930		16	scaffold-HRWG-2007670-Buxbaumia_aphylla	cluster_0560	ABK2
abk2g00336	BA04G16230	BA03G08640	Poh0137860	Poh0006220	Poh0169520	Poh0108750	Hypnum@jg19184.t1	Hypnum@jg4674.t1	Entodon@jg1471.t1	Entodon@jg19594.t1	Sc_g16229		CepurR40.9G050500		CepurGG1@9G050000.1	CepurGG1@9G104300.1	Pp3c11_14880		Pp3c2_25930		16	scaffold-HRWG-2007670-Buxbaumia_aphylla	cluster_0561	ABK2
abk2g00337	BA04G16230	BA03G08640	Poh0137880	Poh0006230	Poh0169550	Poh0108740	Hypnum@jg19186.t1	Hypnum@jg4676.t1	Entodon@jg1473.t1	Entodon@jg19598.t1	Sc_g16228		CepurR40.9G050500		CepurGG1@9G050000.1	CepurGG1@9G104200.1	Pp3c11_14880		Pp3c2_25930		16	scaffold-HRWG-2007670-Buxbaumia_aphylla	cluster_0562	ABK2
abk2g00338	BA04G16230	BA03G08650	Poh0137880	Poh0006210	Poh0169540	Poh0108730	Hypnum@jg19181.t1	Hypnum@jg4676.t1	Entodon@jg1471.t1	Entodon@jg19597.t1	Sc_g16228		CepurR40.9G050500		CepurGG1@9G050000.1	CepurGG1@9G104200.1	Pp3c11_14870		Pp3c2_25930		16	scaffold-HRWG-2007670-Buxbaumia_aphylla	cluster_0563	ABK2
abk2g00342	BA04G16260	BA03G08640	Poh0137880	Poh0006210	Poh0169550	Poh0108730	Hypnum@jg19184.t1	Hypnum@jg4676.t1	Entodon@jg1471.t1	Entodon@jg19598.t1	Sc_g16229		CepurR40.9G050600		CepurGG1@9G050100.1	CepurGG1@9G104200.1	Pp3c11_14880		Pp3c2_25930		16	scaffold-HRWG-2007670-Buxbaumia_aphylla	cluster_0564	ABK2
abk2g00343	BA04G16210	BA03G08680	Poh0138110	Poh0006250	Poh0169320	Poh0108760	Hypnum@jg19177.t1	Hypnum@jg4680.t1	Entodon@jg1465.t1	Entodon@jg19586.t1			CepurR40.9G049700		CepurGG1@9G048900.1		Pp3c11_14950	Pp3c7_10260	Pp3c2_25970		15	scaffold-AWOI-2014616-Diphyscium_foliosum	cluster_0565	ABK2
abk2g00344	BA04G16210	BA03G08680	Poh0138110	Poh0006250	Poh0169320	Poh0108760	Hypnum@jg19177.t1	Hypnum@jg4680.t1	Entodon@jg1465.t1	Entodon@jg19586.t1			CepurR40.9G049700		CepurGG1@9G048900.1		Pp3c11_14950	Pp3c7_10260	Pp3c2_25970		15	scaffold-AWOI-2014616-Diphyscium_foliosum	cluster_0566	ABK2
abk2g00345	BA04G16210	BA03G08680	Poh0138110	Poh0006250	Poh0169320	Poh0108760	Hypnum@jg19177.t1	Hypnum@jg4680.t1	Entodon@jg1465.t1	Entodon@jg19586.t1			CepurR40.9G049700		CepurGG1@9G048900.1		Pp3c11_14950	Pp3c7_10260	Pp3c2_25970		15	scaffold-AWOI-2014616-Diphyscium_foliosum	cluster_0567	ABK2
abk2g00346	BA04G16210	BA03G08680	Poh0138110	Poh0006250	Poh0169320	Poh0108760	Hypnum@jg19177.t1	Hypnum@jg4680.t1	Entodon@jg1465.t1	Entodon@jg19586.t1			CepurR40.9G049700		CepurGG1@9G048900.1		Pp3c11_14950	Pp3c7_10260	Pp3c2_25970		15	scaffold-AWOI-2014616-Diphyscium_foliosum	cluster_0568	ABK2
abk2g00347	BA04G16230	BA03G08630	Poh0137880	Poh0006210	Poh0169520	Poh0108730	Hypnum@jg19211.t1	Hypnum@jg4674.t1	Entodon@jg1468.t1	Entodon@jg19594.t1	Sc_g16228		CepurR40.9G050500		CepurGG1@9G050000.1	CepurGG1@9G104500.1	Pp3c11_14880		Pp3c2_25930		16	scaffold-HRWG-2007670-Buxbaumia_aphylla	cluster_0569	ABK2
abk2g00348	BA04G16250	BA03G08650		Poh0006220	Poh0169540	Poh0108750	Hypnum@jg19186.t1	Hypnum@jg4676.t1	Entodon@jg1471.t1	Entodon@jg19597.t1	Sc_g16228		CepurR40.9G050500		CepurGG1@9G050000.1	CepurGG1@9G104200.1	Pp3c11_14870		Pp3c2_25930		15	scaffold-HRWG-2007670-Buxbaumia_aphylla	cluster_0570	ABK2
abk2g00349		BA03G08660	Poh0138100		Poh0169330		Hypnum@jg19187.t1	Hypnum@jg4678.t1	Entodon@jg1466.t1	Entodon@jg19588.t1			CepurR40.9G049800		CepurGG1@9G049200.1		Pp3c11_14920	Pp3c7_10280	Pp3c2_25950		12	scaffold-AWOI-2009051-Diphyscium_foliosum	cluster_0571	ABK2
abk2g00356		BA03G08660	Poh0138100		Poh0169330		Hypnum@jg19187.t1	Hypnum@jg4678.t1	Entodon@jg1466.t1	Entodon@jg19588.t1			CepurR40.9G049800		CepurGG1@9G049200.1		Pp3c11_14920	Pp3c7_10280	Pp3c2_25950		12	scaffold-AWOI-2009051-Diphyscium_foliosum	cluster_0572	ABK2
abk2g00357	BA04G16160			Poh0006280		Poh0108780	Hypnum@jg19171.t1		Entodon@jg1462.t1		Sc_g16394		CepurR40.9G049100		CepurGG1@9G048600.1		Pp3c11_14960		Pp3c2_26100		10	scaffold-AWOI-2008883-Diphyscium_foliosum	cluster_0573	ABK2
abk2g00358		BA03G08660	Poh0138100		Poh0169330		Hypnum@jg19187.t1	Hypnum@jg4678.t1	Entodon@jg1466.t1	Entodon@jg19588.t1			CepurR40.9G049800		CepurGG1@9G049200.1		Pp3c11_14920	Pp3c7_10280	Pp3c2_25950		12	scaffold-AWOI-2009051-Diphyscium_foliosum	cluster_0574	ABK2
abk2g00359		BA03G08660	Poh0138100		Poh0169330			Hypnum@jg4678.t1	Entodon@jg1466.t1				CepurR40.9G049800		CepurGG1@9G049200.1		Pp3c11_14920	Pp3c7_10280	Pp3c2_25950		10	scaffold-AWOI-2009051-Diphyscium_foliosum	cluster_0575	ABK2
abk2g00360	BA04G16160			Poh0006280		Poh0108780	Hypnum@jg19174.t1		Entodon@jg1462.t1		Sc_g16394		CepurR40.9G049100		CepurGG1@9G048600.1		Pp3c11_14960		Pp3c2_26100		10	scaffold-AWOI-2008883-Diphyscium_foliosum	cluster_0576	ABK2
abk2g00362	BA04G16210	BA03G08680	Poh0138110	Poh0006250	Poh0169320	Poh0108760	Hypnum@jg19177.t1	Hypnum@jg4680.t1	Entodon@jg1465.t1						CepurGG1@9G048900.1		Pp3c11_14950	Pp3c7_10260	Pp3c2_25970		13	scaffold-AWOI-2014616-Diphyscium_foliosum	cluster_0577	ABK2
abk2g00366	BA04G16210	BA03G08680	Poh0138110	Poh0006250	Poh0169320	Poh0108760	Hypnum@jg19177.t1	Hypnum@jg4680.t1	Entodon@jg1465.t1				CepurR40.9G049700		CepurGG1@9G048900.1		Pp3c11_14950	Pp3c7_10260	Pp3c2_25970		14	scaffold-AWOI-2014616-Diphyscium_foliosum	cluster_0578	ABK2
abk2g00367	BA04G16210	BA03G08680		Poh0006250		Poh0108760	Hypnum@jg19177.t1	Hypnum@jg4680.t1	Entodon@jg1465.t1				CepurR40.9G049700		CepurGG1@9G048900.1		Pp3c11_14950	Pp3c7_10260	Pp3c2_25970		12	scaffold-AWOI-2014616-Diphyscium_foliosum	cluster_0579	ABK2
abk2g00368	BA04G16160			Poh0006280		Poh0108780	Hypnum@jg19171.t1		Entodon@jg1462.t1		Sc_g16394		CepurR40.9G049100		CepurGG1@9G048600.1		Pp3c11_14960		Pp3c2_26100		10	scaffold-AWOI-2008883-Diphyscium_foliosum	cluster_0580	ABK2
abk2g00379	BA04G16040		Poh0109640	Poh0007200			Hypnum@jg19162.t1			Entodon@jg1496.t1	Sc_g16398		CepurR40.9G048300		CepurGG1@9G047800.1		Pp3c11_15100	Pp3c7_10100			10	scaffold-AWOI-2014900-Diphyscium_foliosum	cluster_0581	ABK2
abk2g00382	BA04G16040		Poh0109640	Poh0007200			Hypnum@jg19162.t1			Entodon@jg1496.t1	Sc_g16398		CepurR40.9G048300		CepurGG1@9G047800.1		Pp3c11_15100	Pp3c7_10100			10	scaffold-AWOI-2014900-Diphyscium_foliosum	cluster_0582	ABK2
abk2g00385	BA04G16010		Poh0138140	Poh0006300	Poh0169300	Poh0108800	Hypnum@jg19165.t1	Hypnum@jg4684.t1	Entodon@jg19582.t1	Entodon@jg1491.t1	Sc_g16396		CepurR40.9G049000		CepurGG1@9G048500.1		Pp3c11_15160	Pp3c7_10070	Pp3c2_26110		15	scaffold-AWOI-2014800-Diphyscium_foliosum	cluster_0583	ABK2
abk2g00386	BA04G16010		Poh0138140	Poh0006300	Poh0169300	Poh0108800	Hypnum@jg19165.t1	Hypnum@jg4684.t1	Entodon@jg19582.t1	Entodon@jg1491.t1	Sc_g16396		CepurR40.9G049000		CepurGG1@9G048500.1		Pp3c11_15160	Pp3c7_10070	Pp3c2_26110		15	scaffold-AWOI-2072995-Diphyscium_foliosum	cluster_0584	ABK2
abk2g00387	BA04G16030		Poh0109650	Poh0007210			Hypnum@jg19164.t1			Entodon@jg1492.t1	Sc_g16397		CepurR40.9G048600		CepurGG1@9G048000.1		Pp3c11_15150	Pp3c7_10110			10	scaffold-HRWG-2008198-Buxbaumia_aphylla	cluster_0585	ABK2
abk2g00388	BA04G16010		Poh0138140	Poh0006300	Poh0169300	Poh0108800	Hypnum@jg19165.t1	Hypnum@jg4684.t1	Entodon@jg19582.t1	Entodon@jg1491.t1	Sc_g16396		CepurR40.9G049000		CepurGG1@9G048500.1		Pp3c11_15160	Pp3c7_10070	Pp3c2_26110		15	scaffold-AWOI-2072995-Diphyscium_foliosum	cluster_0586	ABK2
abk2g00397	BA04G16100		Poh0109590	Poh0007150			Hypnum@jg19152.t1			Entodon@jg1503.t1	Sc_g16404		CepurR40.9G047200		CepurGG1@9G046400.1		Pp3c11_15260	Pp3c7_9970			10	scaffold-HRWG-2010269-Buxbaumia_aphylla	cluster_0587	ABK2
abk2g00400	BA04G16000		Poh0109500	Poh0007070			Hypnum@jg19139.t1	Hypnum@jg4701.t1	Entodon@jg19572.t1	Entodon@jg1512.t1	Sc_g16407		CepurR40.9G045900		CepurGG1@9G045400.1		Pp3c11_15300	Pp3c1_13640	Pp3c2_26320	Pp3c7_11060	14	scaffold-AWOI-2073247-Diphyscium_foliosum	cluster_0588	ABK2
abk2g00401	BA04G16000		Poh0109520	Poh0007070			Hypnum@jg19139.t1	Hypnum@jg4701.t1	Entodon@jg19572.t1	Entodon@jg1512.t1	Sc_g16407		CepurR40.9G045900		CepurGG1@9G045400.1		Pp3c11_15300	Pp3c1_13640	Pp3c2_26320	Pp3c7_11060	14	scaffold-AWOI-2073247-Diphyscium_foliosum	cluster_0589	ABK2
abk2g00402	BA04G16000		Poh0109520	Poh0007070			Hypnum@jg19139.t1	Hypnum@jg4701.t1	Entodon@jg19572.t1	Entodon@jg1512.t1	Sc_g16407		CepurR40.9G045900		CepurGG1@9G045400.1		Pp3c11_15300	Pp3c1_13640	Pp3c2_26320	Pp3c7_11060	14	scaffold-AWOI-2073247-Diphyscium_foliosum	cluster_0590	ABK2
abk2g00403	BA04G16180		Poh0109530	Poh0007080			Hypnum@jg19136.t1			Entodon@jg1513.t1	Sc_g16406		CepurR40.9G046100		CepurGG1@9G045500.1		Pp3c11_15290			Pp3c7_11070	10	scaffold-HRWG-2014569-Buxbaumia_aphylla	cluster_0591	ABK2
abk2g00407	BA04G15990		Poh0109510	Poh0007060			Hypnum@jg19135.t1			Entodon@jg1514.t1			CepurR40.9G045800		CepurGG1@9G045300.1		Pp3c11_15310	Pp3c1_13720		Pp3c7_11040	10	#N/A	cluster_0592	ABK2
abk2g00408	BA04G15990		Poh0109510	Poh0007060			Hypnum@jg19135.t1			Entodon@jg1514.t1			CepurR40.9G045800		CepurGG1@9G045300.1		Pp3c11_15310	Pp3c1_13720		Pp3c7_11040	10	#N/A	cluster_0593	ABK2
abk2g00409	BA04G16000		Poh0109520	Poh0007070			Hypnum@jg19139.t1	Hypnum@jg4701.t1	Entodon@jg19572.t1	Entodon@jg1512.t1	Sc_g16407		CepurR40.9G045900		CepurGG1@9G045400.1		Pp3c11_15300	Pp3c1_13640	Pp3c2_26320	Pp3c7_11060	14	scaffold-AWOI-2073247-Diphyscium_foliosum	cluster_0594	ABK2
abk2g00414	BA04G16150		Poh0109540	Poh0007090			Hypnum@jg19139.t1	Hypnum@jg4699.t1	Entodon@jg19573.t1	Entodon@jg1512.t1	Sc_g16405		CepurR40.9G046300		CepurGG1@9G045700.1		Pp3c11_15300	Pp3c1_13600	Pp3c2_26270	Pp3c7_11080	14	scaffold-AWOI-2073247-Diphyscium_foliosum	cluster_0595	ABK2
abk2g00415	BA04G16000		Poh0109500	Poh0007050			Hypnum@jg19139.t1	Hypnum@jg4701.t1	Entodon@jg19572.t1	Entodon@jg1512.t1	Sc_g16407		CepurR40.9G045900		CepurGG1@9G045400.1		Pp3c11_15300	Pp3c1_13640	Pp3c2_26320	Pp3c7_11060	14	scaffold-AWOI-2073247-Diphyscium_foliosum	cluster_0596	ABK2
abk2g00416	BA04G15990		Poh0109510	Poh0007060			Hypnum@jg19135.t1			Entodon@jg1514.t1			CepurR40.9G045800		CepurGG1@9G045300.1		Pp3c11_15310	Pp3c1_13720		Pp3c7_11040	10	#N/A	cluster_0597	ABK2
abk2g00432	BA04G15840	BA03G17380	Poh0171160				Hypnum@jg19126.t1			Entodon@jg1528.t1	Sc_g16241		CepurR40.9G042800		CepurGG1@9G043100.1		Pp3c11_15500	Pp3c1_13800			10	#N/A	cluster_0598	ABK2
abk2g00435		BA03G17400	Poh0171180				Hypnum@jg19124.t1	Hypnum@jg4784.t1	Entodon@jg19484.t1	Entodon@jg1530.t1	Sc_g16244		CepurR40.9G043000		CepurGG1@9G043300.1		Pp3c11_15540	Pp3c1_13840	Pp3c7_9820		12	scaffold-AWOI-2012991-Diphyscium_foliosum	cluster_0599	ABK2
abk2g00436		BA03G17400	Poh0171180				Hypnum@jg19124.t1	Hypnum@jg4784.t1	Entodon@jg19484.t1	Entodon@jg1530.t1	Sc_g16244		CepurR40.9G043000		CepurGG1@9G043300.1		Pp3c11_15540	Pp3c1_13840	Pp3c7_9820		12	scaffold-AWOI-2012991-Diphyscium_foliosum	cluster_0600	ABK2
abk2g00437		BA03G17400	Poh0171180				Hypnum@jg19124.t1	Hypnum@jg4784.t1	Entodon@jg19484.t1	Entodon@jg1530.t1	Sc_g16244		CepurR40.9G043000		CepurGG1@9G043300.1		Pp3c11_15540	Pp3c1_13840			11	scaffold-AWOI-2012991-Diphyscium_foliosum	cluster_0601	ABK2
abk2g00440	BA04G15860	BA03G17390	Poh0171170				Hypnum@jg19125.t1	Hypnum@jg4782.t1	Entodon@jg19486.t1	Entodon@jg1529.t1			CepurR40.9G042900		CepurGG1@9G043200.1		Pp3c11_15530	Pp3c1_13830			11	#N/A	cluster_0602	ABK2
abk2g00441	BA04G15850	BA03G17390	Poh0171170				Hypnum@jg19125.t1	Hypnum@jg4782.t1	Entodon@jg19486.t1	Entodon@jg1529.t1			CepurR40.9G042900		CepurGG1@9G043200.1			Pp3c1_13830			10	#N/A	cluster_0603	ABK2
abk2g00442	BA04G15850	BA03G17390					Hypnum@jg19125.t1	Hypnum@jg4782.t1	Entodon@jg19486.t1	Entodon@jg1529.t1			CepurR40.9G042900		CepurGG1@9G043200.1		Pp3c11_15530	Pp3c1_13830			10	#N/A	cluster_0604	ABK2
abk2g00443	BA04G15860	BA03G17390	Poh0171170				Hypnum@jg19125.t1	Hypnum@jg4782.t1	Entodon@jg19486.t1	Entodon@jg1529.t1			CepurR40.9G042900		CepurGG1@9G043200.1			Pp3c1_13830			10	#N/A	cluster_0605	ABK2
abk2g00444	BA04G15850	BA03G17390	Poh0171170				Hypnum@jg19125.t1	Hypnum@jg4782.t1	Entodon@jg19486.t1	Entodon@jg1529.t1			CepurR40.9G042900		CepurGG1@9G043200.1		Pp3c11_15530	Pp3c1_13830			11	#N/A	cluster_0606	ABK2
abk2g00445	BA04G15850	BA03G17390	Poh0171170				Hypnum@jg19125.t1	Hypnum@jg4782.t1	Entodon@jg19486.t1	Entodon@jg1529.t1			CepurR40.9G042900		CepurGG1@9G043200.1		Pp3c11_15530	Pp3c1_13830			11	scaffold-AWOI-2069007-Diphyscium_foliosum	cluster_0607	ABK2
abk2g00446	BA04G15850	BA03G17390	Poh0171170				Hypnum@jg19125.t1	Hypnum@jg4782.t1	Entodon@jg19486.t1	Entodon@jg1529.t1			CepurR40.9G042900		CepurGG1@9G043200.1		Pp3c11_15530	Pp3c1_13830			11	#N/A	cluster_0608	ABK2
abk2g00447	BA04G15960	BA03G17400	Poh0171180				Hypnum@jg19124.t1	Hypnum@jg4784.t1	Entodon@jg19484.t1	Entodon@jg1530.t1	Sc_g16244		CepurR40.9G043000		CepurGG1@9G043300.1		Pp3c11_15540	Pp3c1_13840	Pp3c7_9820		13	scaffold-AWOI-2012991-Diphyscium_foliosum	cluster_0609	ABK2
abk2g00450	BA04G15950	BA03G17410					Hypnum@jg19123.t1	Hypnum@jg4791.t1	Entodon@jg19479.t1	Entodon@jg1531.t1	Sc_g16246		CepurR40.9G043300		CepurGG1@9G043500.1		Pp3c11_15600	Pp3c1_13870	Pp3c7_9800		12	scaffold-HRWG-2001712-Buxbaumia_aphylla	cluster_0610	ABK2
abk2g00467	BA03G06480	BA04G13830	Poh0137190				Hypnum@jg19336.t1	Hypnum@jg3676.t1	Entodon@jg1635.t1	Entodon@jg20513.t1	Sc_g16435		CepurR40.9G029000		CepurGG1@9G030700.1		Pp3c11_15920	Pp3c7_14540	Pp3c2_24620		13	scaffold-HRWG-2016392-Buxbaumia_aphylla	cluster_0611	ABK2
abk2g00470	BA03G06480	BA04G13830	Poh0137190				Hypnum@jg19336.t1	Hypnum@jg3676.t1	Entodon@jg1635.t1	Entodon@jg20513.t1	Sc_g16435		CepurR40.9G029000		CepurGG1@9G030700.1		Pp3c11_15920	Pp3c7_14540	Pp3c2_24620		13	scaffold-HRWG-2016392-Buxbaumia_aphylla	cluster_0612	ABK2
abk2g00471	BA03G06480	BA04G13830	Poh0137190				Hypnum@jg19336.t1	Hypnum@jg3676.t1	Entodon@jg1635.t1	Entodon@jg20513.t1	Sc_g16435		CepurR40.9G029000		CepurGG1@9G030700.1		Pp3c11_15920	Pp3c7_14540	Pp3c2_24620		13	scaffold-HRWG-2016392-Buxbaumia_aphylla	cluster_0613	ABK2
abk2g00472	BA03G06460	BA04G13820	Poh0137180				Hypnum@jg19321.t1	Hypnum@jg3668.t1	Entodon@jg1634.t1	Entodon@jg20526.t1	Sc_g16428		CepurR40.9G028900		CepurGG1@9G030400.1		Pp3c11_15920	Pp3c7_14360	Pp3c2_24620		13	scaffold-AWOI-2073869-Diphyscium_foliosum	cluster_0614	ABK2
abk2g00473	BA03G06480	BA04G13830	Poh0137190				Hypnum@jg19336.t1	Hypnum@jg3676.t1	Entodon@jg1635.t1	Entodon@jg20513.t1	Sc_g16435		CepurR40.9G029000		CepurGG1@9G030700.1		Pp3c11_15920	Pp3c7_14540	Pp3c2_24620		13	scaffold-HRWG-2070656-Buxbaumia_aphylla	cluster_0615	ABK2
abk2g00474	BA03G06490		Poh0137200				Hypnum@jg19335.t1	Hypnum@jg3677.t1	Entodon@jg1636.t1	Entodon@jg20512.t1	Sc_g16427		CepurR40.9G029200		CepurGG1@9G031100.1		Pp3c11_15930	Pp3c7_14570	Pp3c2_24640		12	scaffold-HRWG-2009225-Buxbaumia_aphylla	cluster_0616	ABK2
abk2g00475	BA03G06490		Poh0137200				Hypnum@jg19335.t1	Hypnum@jg3677.t1	Entodon@jg1636.t1	Entodon@jg20512.t1	Sc_g16427		CepurR40.9G029200		CepurGG1@9G031100.1		Pp3c11_15930	Pp3c7_14570	Pp3c2_24640		12	scaffold-AWOI-2071817-Diphyscium_foliosum	cluster_0617	ABK2
abk2g00528	BA04G14470	BA03G08350	Poh0016090	Poh0005050	Poh0205720		Hypnum@jg19479.t1		Entodon@jg1756.t1		Sc_g16462	Sc_g16514	CepurR40.9G003100		CepurGG1@9G002800.1		Pp3c11_17260				12	scaffold-AWOI-2002577-Diphyscium_foliosum	cluster_0618	ABK2
abk2g00530	BA04G14470	BA03G08350	Poh0016090	Poh0005050	Poh0205720		Hypnum@jg19499.t1		Entodon@jg1756.t1		Sc_g16462	Sc_g16514	CepurR40.9G002700		CepurGG1@9G002500.1		Pp3c11_17260				12	scaffold-AWOI-2002577-Diphyscium_foliosum	cluster_0619	ABK2
abk2g00535	BA04G14470	BA03G08350	Poh0016090	Poh0005050	Poh0205720		Hypnum@jg19479.t1		Entodon@jg1756.t1		Sc_g16462	Sc_g16514	CepurR40.9G002700		CepurGG1@9G002500.1		Pp3c11_17230				12	scaffold-AWOI-2002578-Diphyscium_foliosum	cluster_0620	ABK2
abk2g00538	BA04G14470	BA03G08350	Poh0016090	Poh0005050			Hypnum@jg19499.t1				Sc_g16462	Sc_g16514	CepurR40.9G002700		CepurGG1@9G002500.1		Pp3c11_17260				10	scaffold-AWOI-2002577-Diphyscium_foliosum	cluster_0621	ABK2
abk2g00540	BA04G14430	BA03G08180	Poh0016110	Poh0005030	Poh0205560		Hypnum@jg19496.t1		Entodon@jg1739.t1			Sc_g16515	CepurR40.9G002200		CepurGG1@9G002000.1		Pp3c11_17280				11	scaffold-AWOI-2006793-Diphyscium_foliosum	cluster_0622	ABK2
abk2g00541	BA04G14430	BA03G08180	Poh0016110	Poh0005030	Poh0205560		Hypnum@jg19496.t1		Entodon@jg1739.t1			Sc_g16515	CepurR40.9G002200		CepurGG1@9G002000.1		Pp3c11_17290				11	#N/A	cluster_0623	ABK2
abk2g00560	BA03G18750		Poh0210020	Poh0185810			Hypnum@jg5655.t1		Entodon@jg18682.t1		Sc_g03787		CepurR40.3G246700		CepurGG1@3G247000.1		Pp3c11_17610	Pp3c7_11350			10	scaffold-AWOI-2013441-Diphyscium_foliosum	cluster_0624	ABK2
abk2g00565	BA03G18730		Poh0210000	Poh0185830			Hypnum@jg5652.t1		Entodon@jg18686.t1		Sc_g03789		CepurR40.3G247600		CepurGG1@3G247800.1		Pp3c11_17720	Pp3c7_11370			10	scaffold-HRWG-2006064-Buxbaumia_aphylla	cluster_0625	ABK2
abk2g00566	BA03G18730		Poh0210000	Poh0185830			Hypnum@jg5652.t1		Entodon@jg18686.t1		Sc_g03789		CepurR40.3G247600		CepurGG1@3G247800.1		Pp3c11_17720	Pp3c7_11370			10	scaffold-HRWG-2006064-Buxbaumia_aphylla	cluster_0626	ABK2
abk2g00567	BA03G18730		Poh0210000	Poh0185830			Hypnum@jg5652.t1		Entodon@jg18686.t1		Sc_g03789		CepurR40.3G247600		CepurGG1@3G247800.1		Pp3c11_17720	Pp3c7_11370			10	scaffold-HRWG-2006064-Buxbaumia_aphylla	cluster_0627	ABK2
abk2g00568	BA03G18740		Poh0210010	Poh0185820			Hypnum@jg5654.t1		Entodon@jg18684.t1		Sc_g03793		CepurR40.3G247000		CepurGG1@3G247300.1		Pp3c11_17710	Pp3c7_11360			10	scaffold-HRWG-2009736-Buxbaumia_aphylla	cluster_0628	ABK2
abk2g00573	BA03G18740		Poh0210010	Poh0185820			Hypnum@jg5654.t1		Entodon@jg18684.t1		Sc_g03793		CepurR40.3G247000		CepurGG1@3G247300.1		Pp3c11_17710	Pp3c7_11360			10	scaffold-HRWG-2009736-Buxbaumia_aphylla	cluster_0629	ABK2
abk2g00574	BA03G18740		Poh0210010	Poh0185820			Hypnum@jg5654.t1		Entodon@jg18684.t1		Sc_g03793		CepurR40.3G247000		CepurGG1@3G247300.1		Pp3c11_17710	Pp3c7_11360			10	scaffold-HRWG-2009736-Buxbaumia_aphylla	cluster_0630	ABK2
abk2g00576	BA03G18740		Poh0210010	Poh0185820			Hypnum@jg5654.t1		Entodon@jg18684.t1		Sc_g03793		CepurR40.3G247000		CepurGG1@3G247300.1		Pp3c11_17710	Pp3c7_11360			10	scaffold-AWOI-2069540-Diphyscium_foliosum	cluster_0631	ABK2
abk2g00578	BA03G18730		Poh0210000	Poh0185830			Hypnum@jg5652.t1		Entodon@jg18686.t1		Sc_g03789		CepurR40.3G247600		CepurGG1@3G247800.1		Pp3c11_17720	Pp3c7_11370			10	scaffold-HRWG-2006064-Buxbaumia_aphylla	cluster_0632	ABK2
abk2g00581	BA03G18730		Poh0210000	Poh0185830			Hypnum@jg5652.t1		Entodon@jg18686.t1		Sc_g03789		CepurR40.3G247600		CepurGG1@3G247800.1		Pp3c11_17720	Pp3c7_11370			10	scaffold-HRWG-2006064-Buxbaumia_aphylla	cluster_0633	ABK2
abk2g00586	BA03G15360		Poh0209960	Poh0185860			Hypnum@jg5647.t1		Entodon@jg18689.t1		Sc_g03792		CepurR40.3G247100		CepurGG1@3G247400.1		Pp3c11_17830	Pp3c7_11410			10	scaffold-HRWG-2015491-Buxbaumia_aphylla	cluster_0634	ABK2
abk2g00594	BA03G15360		Poh0209960	Poh0185860			Hypnum@jg5647.t1		Entodon@jg18689.t1		Sc_g03792		CepurR40.3G247100		CepurGG1@3G247400.1		Pp3c11_17830	Pp3c7_11410			10	scaffold-HRWG-2015491-Buxbaumia_aphylla	cluster_0635	ABK2
abk2g00600	BA03G15360		Poh0209960	Poh0185860			Hypnum@jg5647.t1		Entodon@jg18689.t1		Sc_g03792		CepurR40.3G247100		CepurGG1@3G247400.1		Pp3c11_17830	Pp3c7_11410			10	scaffold-HRWG-2015491-Buxbaumia_aphylla	cluster_0636	ABK2
abk2g00601	BA03G15360		Poh0209960	Poh0185860			Hypnum@jg5647.t1		Entodon@jg18689.t1		Sc_g03792		CepurR40.3G247100		CepurGG1@3G247400.1		Pp3c11_17830	Pp3c7_11410			10	scaffold-HRWG-2015491-Buxbaumia_aphylla	cluster_0637	ABK2
abk2g00602	BA03G15320		Poh0209910	Poh0185900				Hypnum@jg5606.t1	Entodon@jg18694.t1			Sc_g03646		CepurR40.3G239500		CepurGG1@3G241100.1	Pp3c11_17860	Pp3c7_11570			10	scaffold-AWOI-2005447-Diphyscium_foliosum	cluster_0638	ABK2
abk2g00603	BA03G15330		Poh0209930	Poh0185890				Hypnum@jg5602.t1	Entodon@jg18692.t1			Sc_g03645		CepurR40.3G239700		CepurGG1@3G240900.1	Pp3c11_17850	Pp3c7_11530			10	scaffold-AWOI-2014896-Diphyscium_foliosum	cluster_0639	ABK2
abk2g00606	BA03G15330		Poh0209930	Poh0185890				Hypnum@jg5602.t1	Entodon@jg18692.t1			Sc_g03645		CepurR40.3G239700		CepurGG1@3G240900.1	Pp3c11_17850	Pp3c7_11530			10	scaffold-AWOI-2014896-Diphyscium_foliosum	cluster_0640	ABK2
abk2g00607	BA03G15330		Poh0209930	Poh0185890				Hypnum@jg5602.t1	Entodon@jg18692.t1			Sc_g03645		CepurR40.3G239700		CepurGG1@3G240900.1	Pp3c11_17850	Pp3c7_11530			10	scaffold-AWOI-2014896-Diphyscium_foliosum	cluster_0641	ABK2
abk2g00609	BA03G15330		Poh0209930	Poh0185890				Hypnum@jg5602.t1	Entodon@jg18692.t1			Sc_g03645		CepurR40.3G239700		CepurGG1@3G240900.1	Pp3c11_17850	Pp3c7_11530			10	scaffold-AWOI-2014896-Diphyscium_foliosum	cluster_0642	ABK2
abk2g00610	BA03G15320		Poh0209910	Poh0185900				Hypnum@jg5606.t1	Entodon@jg18694.t1			Sc_g03646		CepurR40.3G239500		CepurGG1@3G241100.1	Pp3c11_17860	Pp3c7_11570			10	scaffold-AWOI-2005447-Diphyscium_foliosum	cluster_0643	ABK2
abk2g00611	BA03G15320		Poh0209910	Poh0185900				Hypnum@jg5606.t1	Entodon@jg18694.t1			Sc_g03646		CepurR40.3G239500		CepurGG1@3G241100.1	Pp3c11_17860	Pp3c7_11570			10	scaffold-AWOI-2005447-Diphyscium_foliosum	cluster_0644	ABK2
abk2g00612	BA03G15320		Poh0209910	Poh0185900				Hypnum@jg5606.t1	Entodon@jg18694.t1			Sc_g03646		CepurR40.3G239500		CepurGG1@3G241100.1	Pp3c11_17860	Pp3c7_11570			10	scaffold-AWOI-2005447-Diphyscium_foliosum	cluster_0645	ABK2
abk2g00727	BA03G19680		Poh0267280	Poh0249120			Hypnum@jg4898.t1		Entodon@jg19385.t1		Sc_g02601		CepurR40.3G065300		CepurGG1@3G064600.1		Pp3c11_18960	Pp3c7_3330			10	scaffold-AWOI-2071556-Diphyscium_foliosum	cluster_0646	ABK2
abk2g00728	BA03G19680		Poh0267280	Poh0249120			Hypnum@jg4898.t1		Entodon@jg19385.t1		Sc_g02601		CepurR40.3G065300		CepurGG1@3G064600.1		Pp3c11_18960	Pp3c7_3330			10	scaffold-AWOI-2071556-Diphyscium_foliosum	cluster_0647	ABK2
abk2g00729	BA03G19680		Poh0267280	Poh0249120			Hypnum@jg4898.t1		Entodon@jg19385.t1		Sc_g02601		CepurR40.3G065300		CepurGG1@3G064600.1		Pp3c11_18960	Pp3c7_3330			10	scaffold-AWOI-2071556-Diphyscium_foliosum	cluster_0648	ABK2
abk2g00731	BA03G19680		Poh0267280	Poh0249120			Hypnum@jg4898.t1		Entodon@jg19385.t1		Sc_g02601		CepurR40.3G065300		CepurGG1@3G064600.1		Pp3c11_18960	Pp3c7_3330			10	scaffold-AWOI-2071556-Diphyscium_foliosum	cluster_0649	ABK2
abk2g00737	BA03G19600		Poh0267240	Poh0249150			Hypnum@jg4897.t1		Entodon@jg19386.t1		Sc_g02608		CepurR40.3G065000		CepurGG1@3G064200.1		Pp3c11_18990	Pp3c7_3290			10	scaffold-AWOI-2006345-Diphyscium_foliosum	cluster_0650	ABK2
abk2g00738	BA03G19600		Poh0267240	Poh0249150			Hypnum@jg4897.t1		Entodon@jg19386.t1		Sc_g02608		CepurR40.3G065000		CepurGG1@3G064200.1		Pp3c11_18990	Pp3c7_3290			10	scaffold-AWOI-2006345-Diphyscium_foliosum	cluster_0651	ABK2
abk2g00739	BA03G19600		Poh0267240	Poh0249150			Hypnum@jg4897.t1		Entodon@jg19386.t1		Sc_g02608		CepurR40.3G065000		CepurGG1@3G064200.1		Pp3c11_18990	Pp3c7_3290			10	scaffold-AWOI-2006345-Diphyscium_foliosum	cluster_0652	ABK2
abk2g00741	BA03G19600		Poh0267240	Poh0249150			Hypnum@jg4897.t1		Entodon@jg19386.t1		Sc_g02608		CepurR40.3G065000		CepurGG1@3G064200.1		Pp3c11_18990	Pp3c7_3290			10	scaffold-AWOI-2006345-Diphyscium_foliosum	cluster_0653	ABK2
abk2g00755	BA03G20510		Poh0211840	Poh0183820			Hypnum@jg5894.t1		Entodon@jg18467.t1		Sc_g02862		CepurR40.3G077800		CepurGG1@3G078900.1		Pp3c11_19180	Pp3c7_7150			10	scaffold-AWOI-2013611-Diphyscium_foliosum	cluster_0654	ABK2
abk2g00756	BA03G20510		Poh0211840	Poh0183820			Hypnum@jg5894.t1		Entodon@jg18467.t1		Sc_g02862		CepurR40.3G077800		CepurGG1@3G078900.1		Pp3c11_19180	Pp3c7_7150			10	scaffold-AWOI-2013611-Diphyscium_foliosum	cluster_0655	ABK2
abk2g00761	BA03G20510		Poh0211840	Poh0183820			Hypnum@jg5894.t1		Entodon@jg18467.t1		Sc_g02862		CepurR40.3G077800		CepurGG1@3G078900.1		Pp3c11_19180	Pp3c7_7150			10	scaffold-AWOI-2013611-Diphyscium_foliosum	cluster_0656	ABK2
abk2g00795	BA03G20660		Poh0212060	Poh0183610			Hypnum@jg5928.t1		Entodon@jg18433.t1		Sc_g03524		CepurR40.3G125300		CepurGG1@3G127100.1		Pp3c11_19480	Pp3c7_3560			10	scaffold-AWOI-2005127-Diphyscium_foliosum	cluster_0657	ABK2
abk2g00797	BA03G20650		Poh0212100	Poh0183570			Hypnum@jg5932.t1		Entodon@jg18431.t1		Sc_g03523		CepurR40.3G125100		CepurGG1@3G126900.1		Pp3c11_19560	Pp3c7_3420			10	scaffold-AWOI-2012907-Diphyscium_foliosum	cluster_0658	ABK2
abk2g00798	BA03G20650		Poh0212100	Poh0183570			Hypnum@jg5932.t1		Entodon@jg18431.t1		Sc_g03523		CepurR40.3G125100		CepurGG1@3G126900.1		Pp3c11_19560	Pp3c7_3420			10	scaffold-AWOI-2012907-Diphyscium_foliosum	cluster_0659	ABK2
abk2g00799	BA03G20650		Poh0212100	Poh0183570			Hypnum@jg5932.t1		Entodon@jg18431.t1		Sc_g03523		CepurR40.3G125100		CepurGG1@3G126900.1		Pp3c11_19540	Pp3c7_3450			10	scaffold-AWOI-2012907-Diphyscium_foliosum	cluster_0660	ABK2
abk2g00800	BA03G20650		Poh0212100	Poh0183570			Hypnum@jg5932.t1		Entodon@jg18431.t1		Sc_g03523		CepurR40.3G125100		CepurGG1@3G126900.1		Pp3c11_19560	Pp3c7_3420			10	scaffold-AWOI-2012907-Diphyscium_foliosum	cluster_0661	ABK2
abk2g00801	BA03G20650		Poh0212100	Poh0183570			Hypnum@jg5932.t1		Entodon@jg18431.t1		Sc_g03523		CepurR40.3G125100		CepurGG1@3G126900.1		Pp3c11_19560	Pp3c7_3420			10	scaffold-AWOI-2012907-Diphyscium_foliosum	cluster_0662	ABK2
abk2g00808	BA03G20650		Poh0212100	Poh0183570			Hypnum@jg5932.t1		Entodon@jg18431.t1		Sc_g03523		CepurR40.3G125100		CepurGG1@3G126900.1		Pp3c11_19560	Pp3c7_3420			10	scaffold-AWOI-2012907-Diphyscium_foliosum	cluster_0663	ABK2
abk2g00810	BA03G20670		Poh0212120	Poh0183550			Hypnum@jg5949.t1		Entodon@jg18422.t1		Sc_g03519		CepurR40.3G124700		CepurGG1@3G126200.1		Pp3c11_19620	Pp3c7_3360			10	scaffold-HRWG-2004850-Buxbaumia_aphylla	cluster_0664	ABK2
abk2g00811	BA03G20670		Poh0212120	Poh0183560			Hypnum@jg5949.t1		Entodon@jg18426.t1		Sc_g03519		CepurR40.3G124600		CepurGG1@3G126200.1		Pp3c11_19620	Pp3c7_3360			10	scaffold-HRWG-2004850-Buxbaumia_aphylla	cluster_0665	ABK2
abk2g00812	BA03G20670		Poh0212120	Poh0183560			Hypnum@jg5949.t1		Entodon@jg18426.t1		Sc_g03519		CepurR40.3G124700		CepurGG1@3G126200.1		Pp3c11_19620	Pp3c7_3360			10	scaffold-HRWG-2004850-Buxbaumia_aphylla	cluster_0666	ABK2
abk2g00813	BA03G20670		Poh0212120	Poh0183560			Hypnum@jg5949.t1		Entodon@jg18426.t1		Sc_g03519		CepurR40.3G124600		CepurGG1@3G126200.1		Pp3c11_19620	Pp3c7_3360			10	scaffold-HRWG-2004850-Buxbaumia_aphylla	cluster_0667	ABK2
abk2g00818	BA03G20670		Poh0212120	Poh0183550			Hypnum@jg5949.t1		Entodon@jg18426.t1		Sc_g03519		CepurR40.3G124700		CepurGG1@3G126200.1		Pp3c11_19620	Pp3c7_3360			10	scaffold-HRWG-2004850-Buxbaumia_aphylla	cluster_0668	ABK2
abk2g00823	BA03G20700		Poh0212150	Poh0183490			Hypnum@jg5940.t1		Entodon@jg18417.t1		Sc_g03514		CepurR40.3G123900		CepurGG1@3G125400.1		Pp3c11_19670	Pp3c7_6620			10	scaffold-HRWG-2013410-Buxbaumia_aphylla	cluster_0669	ABK2
abk2g00830	BA03G20700		Poh0212150	Poh0183490			Hypnum@jg5940.t1		Entodon@jg18417.t1		Sc_g03514		CepurR40.3G123900		CepurGG1@3G125400.1		Pp3c11_19670	Pp3c7_6620			10	scaffold-HRWG-2013410-Buxbaumia_aphylla	cluster_0670	ABK2
abk2g00867	BA03G14660		Poh0327780	Poh0206980			Hypnum@jg5243.t1		Entodon@jg18868.t1		Sc_g03099		CepurR40.3G100600		CepurGG1@3G103600.1		Pp3c11_20050	Pp3c7_7910			10	scaffold-AWOI-2070441-Diphyscium_foliosum	cluster_0671	ABK2
abk2g00870	BA03G14650		Poh0327770	Poh0206970			Hypnum@jg5242.t1		Entodon@jg18867.t1		Sc_g03100		CepurR40.3G100400		CepurGG1@3G103400.1		Pp3c11_20060	Pp3c7_7890			10	scaffold-AWOI-2000687-Diphyscium_foliosum	cluster_0672	ABK2
abk2g00871	BA03G14650		Poh0327770	Poh0206970			Hypnum@jg5242.t1		Entodon@jg18867.t1		Sc_g03100		CepurR40.3G100400		CepurGG1@3G103400.1		Pp3c11_20060	Pp3c7_7890			10	scaffold-AWOI-2000687-Diphyscium_foliosum	cluster_0673	ABK2
abk2g00872	BA03G14650		Poh0327770	Poh0206970			Hypnum@jg5242.t1		Entodon@jg18867.t1		Sc_g03100		CepurR40.3G100400		CepurGG1@3G103400.1		Pp3c11_20060	Pp3c7_7890			10	scaffold-AWOI-2000687-Diphyscium_foliosum	cluster_0674	ABK2
abk2g01067		BA03G11850	Poh0328550	Poh0207600			Hypnum@jg5310.t1		Entodon@jg18763.t1			Sc_g02882	CepurR40.3G096400		CepurGG1@3G099500.1		Pp3c11_22450	Pp3c7_4220			10	scaffold-AWOI-2013894-Diphyscium_foliosum	cluster_0675	ABK2
abk2g01072		BA03G11850	Poh0328550	Poh0207600			Hypnum@jg5310.t1		Entodon@jg18763.t1			Sc_g02882	CepurR40.3G096400		CepurGG1@3G099500.1		Pp3c11_22450	Pp3c7_4220			10	scaffold-AWOI-2013894-Diphyscium_foliosum	cluster_0676	ABK2
abk2g01076		BA03G11850	Poh0328550	Poh0207600			Hypnum@jg5310.t1		Entodon@jg18763.t1			Sc_g02882	CepurR40.3G096400		CepurGG1@3G099500.1		Pp3c11_22450	Pp3c7_4230			10	scaffold-AWOI-2013894-Diphyscium_foliosum	cluster_0677	ABK2
abk2g01079	BA03G09420		Poh0188170	Poh0207750			Hypnum@jg5494.t1		Entodon@jg18821.t1		Sc_g02824		CepurR40.3G095400		CepurGG1@3G098400.1		Pp3c11_22560	Pp3c7_4160			10	scaffold-AWOI-2070510-Diphyscium_foliosum	cluster_0678	ABK2
abk2g01082	BA03G09460		Poh0188160	Poh0207760			Hypnum@jg5503.t1		Entodon@jg18816.t1		Sc_g02826		CepurR40.3G095200		CepurGG1@3G098200.1		Pp3c11_22570	Pp3c7_2900			10	scaffold-HRWG-2016195-Buxbaumia_aphylla	cluster_0679	ABK2
abk2g01083	BA03G09460		Poh0188160	Poh0207760			Hypnum@jg5503.t1		Entodon@jg18816.t1		Sc_g02826		CepurR40.3G095200		CepurGG1@3G098200.1		Pp3c11_22570	Pp3c7_2900			10	scaffold-AWOI-2001681-Diphyscium_foliosum	cluster_0680	ABK2
abk2g01084	BA03G09420		Poh0188170	Poh0207750			Hypnum@jg5494.t1		Entodon@jg18821.t1		Sc_g02824		CepurR40.3G095400		CepurGG1@3G098400.1		Pp3c11_22560	Pp3c7_4160			10	scaffold-AWOI-2070510-Diphyscium_foliosum	cluster_0681	ABK2
abk2g01085	BA03G09420		Poh0188170	Poh0207750			Hypnum@jg5494.t1		Entodon@jg18821.t1		Sc_g02824		CepurR40.3G095400		CepurGG1@3G098400.1		Pp3c11_22560	Pp3c7_4165			10	scaffold-AWOI-2070510-Diphyscium_foliosum	cluster_0682	ABK2
abk2g01086	BA03G09460		Poh0188160	Poh0207760			Hypnum@jg5503.t1		Entodon@jg18816.t1		Sc_g02826		CepurR40.3G095200		CepurGG1@3G098200.1		Pp3c11_22570	Pp3c7_2900			10	scaffold-HRWG-2016195-Buxbaumia_aphylla	cluster_0683	ABK2
abk2g01088	BA03G09450		Poh0188150	Poh0207780			Hypnum@jg5499.t1		Entodon@jg18818.t1		Sc_g02827		CepurR40.3G095000		CepurGG1@3G098000.1		Pp3c11_22580	Pp3c7_2870			10	scaffold-AWOI-2071287-Diphyscium_foliosum	cluster_0684	ABK2
abk2g01090	BA03G09440		Poh0188140	Poh0207790			Hypnum@jg5498.t1		Entodon@jg18819.t1		Sc_g02828		CepurR40.3G094600		CepurGG1@3G097900.1		Pp3c11_22600	Pp3c7_2850			10	scaffold-AWOI-2073093-Diphyscium_foliosum	cluster_0685	ABK2
abk2g01094	BA03G09390		Poh0188200	Poh0207720			Hypnum@jg5508.t1		Entodon@jg18812.t1		Sc_g02823		CepurR40.3G095600		CepurGG1@3G098600.1		Pp3c11_22610	Pp3c7_2840			10	scaffold-AWOI-2012440-Diphyscium_foliosum	cluster_0686	ABK2
abk2g01096	BA03G09390		Poh0188200	Poh0207720			Hypnum@jg5508.t1		Entodon@jg18812.t1		Sc_g02823		CepurR40.3G095600		CepurGG1@3G098600.1		Pp3c11_22610	Pp3c7_2840			10	scaffold-AWOI-2012440-Diphyscium_foliosum	cluster_0687	ABK2
abk2g01097	BA03G09390		Poh0188200	Poh0207720			Hypnum@jg5508.t1		Entodon@jg18812.t1		Sc_g02823		CepurR40.3G095600		CepurGG1@3G098600.1		Pp3c11_22610	Pp3c7_2840			10	scaffold-AWOI-2012440-Diphyscium_foliosum	cluster_0688	ABK2
abk2g01175	BA03G19440		Poh0267030	Poh0249400			Hypnum@jg4863.t1		Entodon@jg19414.t1		Sc_g02813		CepurR40.3G114200		CepurGG1@3G115400.1		Pp3c11_23290	Pp3c7_2300			10	scaffold-AWOI-2003254-Diphyscium_foliosum	cluster_0689	ABK2
abk2g01177	BA03G19440		Poh0267030	Poh0249400			Hypnum@jg4863.t1		Entodon@jg19414.t1		Sc_g02813		CepurR40.3G114200		CepurGG1@3G115400.1		Pp3c11_23290	Pp3c7_2300			10	scaffold-AWOI-2003254-Diphyscium_foliosum	cluster_0690	ABK2
abk2g01182	BA03G19440		Poh0267030	Poh0249400			Hypnum@jg4863.t1		Entodon@jg19414.t1		Sc_g02813		CepurR40.3G114200		CepurGG1@3G115400.1		Pp3c11_23290	Pp3c7_2300			10	scaffold-AWOI-2003254-Diphyscium_foliosum	cluster_0691	ABK2
abk2g01197	BA03G19550		Poh0267180	Poh0249270			Hypnum@jg4888.t1		Entodon@jg19393.t1		Sc_g02615		CepurR40.3G064400		CepurGG1@3G063700.1		Pp3c11_23350	Pp3c7_2170			10	scaffold-AWOI-2070278-Diphyscium_foliosum	cluster_0692	ABK2
abk2g01199	BA03G19550		Poh0267180	Poh0249270			Hypnum@jg4888.t1		Entodon@jg19393.t1		Sc_g02615		CepurR40.3G064400		CepurGG1@3G063700.1		Pp3c11_23350	Pp3c7_2170			10	scaffold-AWOI-2070278-Diphyscium_foliosum	cluster_0693	ABK2
abk2g01206	BA03G19560		Poh0267190	Poh0249260			Hypnum@jg4891.t1		Entodon@jg19391.t1		Sc_g02616		CepurR40.3G064600		CepurGG1@3G063900.1		Pp3c11_23370	Pp3c7_2140			10	scaffold-HRWG-2013509-Buxbaumia_aphylla	cluster_0694	ABK2
abk2g01208	BA03G19560		Poh0267190	Poh0249260			Hypnum@jg4891.t1		Entodon@jg19391.t1		Sc_g02616		CepurR40.3G064600		CepurGG1@3G063900.1		Pp3c11_23370	Pp3c7_2140			10	scaffold-AWOI-2071217-Diphyscium_foliosum	cluster_0695	ABK2
abk2g01210	BA03G19550		Poh0267180	Poh0249270			Hypnum@jg4888.t1		Entodon@jg19393.t1		Sc_g02615		CepurR40.3G064400		CepurGG1@3G063700.1		Pp3c11_23350	Pp3c7_2170			10	scaffold-AWOI-2070278-Diphyscium_foliosum	cluster_0696	ABK2
abk2g01214	BA03G19550		Poh0267180	Poh0249270			Hypnum@jg4888.t1		Entodon@jg19393.t1		Sc_g02615		CepurR40.3G064400		CepurGG1@3G063700.1		Pp3c11_23350	Pp3c7_2170			10	scaffold-AWOI-2070278-Diphyscium_foliosum	cluster_0697	ABK2
abk2g01215	BA03G19550		Poh0267180	Poh0249270			Hypnum@jg4888.t1		Entodon@jg19393.t1		Sc_g02615		CepurR40.3G064400		CepurGG1@3G063700.1		Pp3c11_23350	Pp3c7_2170			10	scaffold-AWOI-2070278-Diphyscium_foliosum	cluster_0698	ABK2
abk2g01216	BA03G19550		Poh0267180	Poh0249270			Hypnum@jg4888.t1		Entodon@jg19393.t1		Sc_g02615		CepurR40.3G064400		CepurGG1@3G063700.1		Pp3c11_23350	Pp3c7_2170			10	scaffold-AWOI-2070278-Diphyscium_foliosum	cluster_0699	ABK2
abk2g01217	BA03G19550		Poh0267180	Poh0249270			Hypnum@jg4888.t1		Entodon@jg19393.t1		Sc_g02615		CepurR40.3G064400		CepurGG1@3G063700.1		Pp3c11_23350	Pp3c7_2170			10	scaffold-AWOI-2070278-Diphyscium_foliosum	cluster_0700	ABK2
abk2g01218	BA03G19560		Poh0267190	Poh0249260			Hypnum@jg4891.t1		Entodon@jg19391.t1		Sc_g02616		CepurR40.3G064600		CepurGG1@3G063900.1		Pp3c11_23370	Pp3c7_2140			10	scaffold-AWOI-2071217-Diphyscium_foliosum	cluster_0701	ABK2
abk2g01255	BA03G19270		Poh0328270	Poh0207390			Hypnum@jg5203.t1		Entodon@jg19112.t1		Sc_g03078		CepurR40.3G109900		CepurGG1@3G111800.1		Pp3c11_23610	Pp3c7_2560			10	#N/A	cluster_0702	ABK2
abk2g01256	BA03G19270		Poh0328270	Poh0207390			Hypnum@jg5203.t1		Entodon@jg19112.t1		Sc_g03078		CepurR40.3G109900		CepurGG1@3G111800.1		Pp3c11_23610	Pp3c7_2560			10	#N/A	cluster_0703	ABK2
abk2g01257	BA03G19270		Poh0328270	Poh0207390			Hypnum@jg5203.t1		Entodon@jg19112.t1		Sc_g03078		CepurR40.3G109900		CepurGG1@3G111800.1		Pp3c11_23610	Pp3c7_2560			10	#N/A	cluster_0704	ABK2
abk2g01258	BA03G19270		Poh0328270	Poh0207390			Hypnum@jg5203.t1		Entodon@jg19112.t1		Sc_g03078		CepurR40.3G109900		CepurGG1@3G111800.1		Pp3c11_23610	Pp3c7_2560			10	#N/A	cluster_0705	ABK2
abk2g01259	BA03G19280		Poh0328280	Poh0207400			Hypnum@jg5206.t1		Entodon@jg19110.t1		Sc_g03079		CepurR40.3G110100		CepurGG1@3G112000.1		Pp3c11_23600	Pp3c7_2540			10	scaffold-AWOI-2014686-Diphyscium_foliosum	cluster_0706	ABK2
abk2g01264	BA03G19280		Poh0328280	Poh0207400			Hypnum@jg5206.t1		Entodon@jg19110.t1		Sc_g03079		CepurR40.3G110100		CepurGG1@3G112000.1		Pp3c11_23600	Pp3c7_2540			10	scaffold-AWOI-2014686-Diphyscium_foliosum	cluster_0707	ABK2
abk2g01267	BA03G19270		Poh0328270	Poh0207390			Hypnum@jg5203.t1		Entodon@jg19112.t1		Sc_g03078		CepurR40.3G109900		CepurGG1@3G111800.1		Pp3c11_23610	Pp3c7_2560			10	#N/A	cluster_0708	ABK2
abk2g01272	BA03G19200		Poh0328220	Poh0207350			Hypnum@jg5198.t1		Entodon@jg19116.t1		Sc_g03075		CepurR40.3G109500		CepurGG1@3G111300.1		Pp3c11_23650	Pp3c7_2590			10	scaffold-AWOI-2003255-Diphyscium_foliosum	cluster_0709	ABK2
abk2g01273	BA03G19200		Poh0328220	Poh0207350			Hypnum@jg5198.t1		Entodon@jg19116.t1		Sc_g03075		CepurR40.3G109500		CepurGG1@3G111300.1		Pp3c11_23650	Pp3c7_2590			10	scaffold-AWOI-2003255-Diphyscium_foliosum	cluster_0710	ABK2
abk2g01274	BA03G19200		Poh0328220	Poh0207350			Hypnum@jg5198.t1		Entodon@jg19116.t1		Sc_g03075		CepurR40.3G109500		CepurGG1@3G111300.1		Pp3c11_23650	Pp3c7_2590			10	scaffold-AWOI-2003255-Diphyscium_foliosum	cluster_0711	ABK2
abk2g01275	BA03G19200		Poh0328220	Poh0207350			Hypnum@jg5198.t1		Entodon@jg19116.t1		Sc_g03075		CepurR40.3G109500		CepurGG1@3G111300.1		Pp3c11_23650	Pp3c7_2590			10	scaffold-AWOI-2003255-Diphyscium_foliosum	cluster_0712	ABK2
abk2g01278	BA03G19200		Poh0328220	Poh0207350			Hypnum@jg5198.t1		Entodon@jg19116.t1		Sc_g03075		CepurR40.3G109500		CepurGG1@3G111300.1		Pp3c11_23650	Pp3c7_2590			10	scaffold-AWOI-2003255-Diphyscium_foliosum	cluster_0713	ABK2
abk2g01369	BA03G19900		Poh0182110	Poh0250830			Hypnum@jg4961.t1		Entodon@jg19333.t1		Sc_g03180		CepurR40.3G131100		CepurGG1@3G132700.1		Pp3c11_24240	Pp3c7_1280			10	scaffold-AWOI-2009350-Diphyscium_foliosum	cluster_0714	ABK2
abk2g01370	BA03G19900		Poh0182110	Poh0250830			Hypnum@jg4961.t1		Entodon@jg19333.t1		Sc_g03180		CepurR40.3G131100		CepurGG1@3G132700.1		Pp3c11_24240	Pp3c7_1280			10	scaffold-AWOI-2009350-Diphyscium_foliosum	cluster_0715	ABK2
abk2g01371	BA03G19900		Poh0182110	Poh0250830			Hypnum@jg4961.t1		Entodon@jg19333.t1		Sc_g03180		CepurR40.3G131100		CepurGG1@3G132700.1		Pp3c11_24240	Pp3c7_1280			10	scaffold-AWOI-2009350-Diphyscium_foliosum	cluster_0716	ABK2
abk2g01372	BA03G19900		Poh0182110	Poh0250830			Hypnum@jg4961.t1		Entodon@jg19333.t1		Sc_g03180		CepurR40.3G131100		CepurGG1@3G132700.1		Pp3c11_24240	Pp3c7_1280			10	scaffold-AWOI-2009350-Diphyscium_foliosum	cluster_0717	ABK2
abk2g01373	BA03G19890		Poh0182120	Poh0250840			Hypnum@jg4960.t1		Entodon@jg19334.t1		Sc_g03179		CepurR40.3G131200		CepurGG1@3G132800.1		Pp3c11_24230	Pp3c7_1290			10	scaffold-HRWG-2016037-Buxbaumia_aphylla	cluster_0718	ABK2
abk2g01374	BA03G19890		Poh0182120	Poh0250840			Hypnum@jg4960.t1		Entodon@jg19334.t1		Sc_g03179		CepurR40.3G131200		CepurGG1@3G132800.1		Pp3c11_24230	Pp3c7_1290			10	scaffold-HRWG-2016037-Buxbaumia_aphylla	cluster_0719	ABK2
abk2g01375	BA03G19890		Poh0182120	Poh0250840			Hypnum@jg4960.t1		Entodon@jg19334.t1		Sc_g03179		CepurR40.3G131200		CepurGG1@3G132800.1		Pp3c11_24230	Pp3c7_1290			10	scaffold-HRWG-2016037-Buxbaumia_aphylla	cluster_0720	ABK2
abk2g01376	BA03G19900		Poh0182110	Poh0250830			Hypnum@jg4961.t1		Entodon@jg19333.t1		Sc_g03180		CepurR40.3G131100		CepurGG1@3G132700.1		Pp3c11_24240	Pp3c7_1280			10	scaffold-AWOI-2009350-Diphyscium_foliosum	cluster_0721	ABK2
abk2g01388	BA03G19940		Poh0182070	Poh0250790			Hypnum@jg4976.t1		Entodon@jg19328.t1		Sc_g03189		CepurR40.3G129800		CepurGG1@3G131400.1		Pp3c11_24600	Pp3c7_950			10	scaffold-HRWG-2016130-Buxbaumia_aphylla	cluster_0722	ABK2
abk2g01447	BA03G20350		Poh0182570	Poh0251270			Hypnum@jg5857.t1		Entodon@jg18501.t1		Sc_g02686		CepurR40.3G075200		CepurGG1@3G075200.1		Pp3c11_25350	Pp3c7_1950			10	scaffold-AWOI-2000193-Diphyscium_foliosum	cluster_0723	ABK2
abk2g01451	BA03G20350		Poh0182570	Poh0251270			Hypnum@jg5857.t1		Entodon@jg18491.t1		Sc_g02686		CepurR40.3G075200		CepurGG1@3G076200.1		Pp3c11_25350	Pp3c7_1950			10	scaffold-AWOI-2000193-Diphyscium_foliosum	cluster_0724	ABK2
abk2g01452	BA03G20350		Poh0182570	Poh0251270			Hypnum@jg5865.t1		Entodon@jg18491.t1		Sc_g02686		CepurR40.3G075200		CepurGG1@3G076200.1		Pp3c11_25350	Pp3c7_1950			10	#N/A	cluster_0725	ABK2
abk2g01458	BA03G20310		Poh0182570	Poh0251270			Hypnum@jg5865.t1		Entodon@jg18491.t1		Sc_g02686		CepurR40.3G074300		CepurGG1@3G076200.1		Pp3c11_25350	Pp3c7_1950			10	scaffold-AWOI-2000193-Diphyscium_foliosum	cluster_0726	ABK2
abk2g01470	BA03G20350		Poh0182570	Poh0251270			Hypnum@jg5865.t1		Entodon@jg18501.t1		Sc_g02686		CepurR40.3G075200		CepurGG1@3G075200.1		Pp3c11_25530	Pp3c7_1950			10	scaffold-AWOI-2000193-Diphyscium_foliosum	cluster_0727	ABK2
abk2g01476	BA03G20310		Poh0182570	Poh0251270			Hypnum@jg5857.t1		Entodon@jg18501.t1		Sc_g02686		CepurR40.3G074300		CepurGG1@3G075200.1		Pp3c11_25530	Pp3c7_1950			10	scaffold-AWOI-2000193-Diphyscium_foliosum	cluster_0728	ABK2
abk2g01487	BA03G20230		Poh0182660	Poh0251200			Hypnum@jg5845.t1		Entodon@jg18512.t1		Sc_g02569		CepurR40.3G071800		CepurGG1@3G072200.1		Pp3c11_25630	Pp3c7_1880			10	scaffold-HRWG-2012752-Buxbaumia_aphylla	cluster_0729	ABK2
abk2g01501	BA03G20230		Poh0182660	Poh0251200			Hypnum@jg5845.t1		Entodon@jg18513.t1		Sc_g02569		CepurR40.3G071800		CepurGG1@3G072200.1		Pp3c11_25630	Pp3c7_1880			10	scaffold-HRWG-2012752-Buxbaumia_aphylla	cluster_0730	ABK2
abk2g01502	BA03G20230		Poh0182660	Poh0251200			Hypnum@jg5845.t1		Entodon@jg18512.t1		Sc_g02569		CepurR40.3G071800		CepurGG1@3G072200.1		Pp3c11_25630	Pp3c7_1880			10	scaffold-HRWG-2012752-Buxbaumia_aphylla	cluster_0731	ABK2
abk2g01504	BA03G20230		Poh0182660	Poh0251200			Hypnum@jg5845.t1		Entodon@jg18513.t1		Sc_g02569		CepurR40.3G071800		CepurGG1@3G072200.1		Pp3c11_25630	Pp3c7_1880			10	scaffold-HRWG-2012752-Buxbaumia_aphylla	cluster_0732	ABK2
abk2g01506	BA03G20230		Poh0182660	Poh0251200			Hypnum@jg5845.t1		Entodon@jg18512.t1		Sc_g02569		CepurR40.3G071800		CepurGG1@3G072200.1		Pp3c11_25630	Pp3c7_1880			10	scaffold-HRWG-2012752-Buxbaumia_aphylla	cluster_0733	ABK2
abk2g01507	BA03G20230		Poh0182660	Poh0251200			Hypnum@jg5845.t1		Entodon@jg18512.t1		Sc_g02569		CepurR40.3G071800		CepurGG1@3G072200.1		Pp3c11_25630	Pp3c7_1880			10	scaffold-HRWG-2012752-Buxbaumia_aphylla	cluster_0734	ABK2
abk2g01508	BA03G20230		Poh0182660	Poh0251200			Hypnum@jg5834.t1		Entodon@jg18512.t1		Sc_g02569		CepurR40.3G071800		CepurGG1@3G072200.1		Pp3c11_25630	Pp3c7_1880			10	scaffold-HRWG-2012752-Buxbaumia_aphylla	cluster_0735	ABK2
abk2g01562	BA03G21790		Poh0250020	Poh0373240			Hypnum@jg6117.t1		Entodon@jg18263.t1		Sc_g03733		CepurR40.3G250000		CepurGG1@3G250600.1		Pp3c11_25880	Pp3c7_480			10	scaffold-AWOI-2073105-Diphyscium_foliosum	cluster_0736	ABK2
abk2g01568	BA03G22000		Poh0249820	Poh0266700			Hypnum@jg6146.t1		Entodon@jg18241.t1			Sc_g03765	CepurR40.3G249200		CepurGG1@3G249800.1		Pp3c11_25950	Pp3c7_395			10	scaffold-AWOI-2009320-Diphyscium_foliosum	cluster_0737	ABK2
abk2g01569	BA03G22000		Poh0249820	Poh0266700			Hypnum@jg6146.t1		Entodon@jg18241.t1			Sc_g03765	CepurR40.3G249200		CepurGG1@3G249800.1		Pp3c11_25950	Pp3c7_395			10	scaffold-AWOI-2009320-Diphyscium_foliosum	cluster_0738	ABK2
abk2g01570	BA03G22000		Poh0249820	Poh0266700			Hypnum@jg6146.t1		Entodon@jg18241.t1			Sc_g03765	CepurR40.3G249200		CepurGG1@3G249800.1		Pp3c11_25950	Pp3c7_395			10	scaffold-AWOI-2009320-Diphyscium_foliosum	cluster_0739	ABK2
abk2g01571	BA03G22010		Poh0249830	Poh0266690			Hypnum@jg6144.t1		Entodon@jg18243.t1			Sc_g03766	CepurR40.3G249300		CepurGG1@3G250000.1		Pp3c11_25930	Pp3c7_400			10	scaffold-HRWG-2017122-Buxbaumia_aphylla	cluster_0740	ABK2
abk2g01573	BA03G22010		Poh0249830	Poh0266690			Hypnum@jg6144.t1		Entodon@jg18243.t1			Sc_g03766	CepurR40.3G249300		CepurGG1@3G250000.1		Pp3c11_25930	Pp3c7_400			10	scaffold-HRWG-2017122-Buxbaumia_aphylla	cluster_0741	ABK2
abk2g01574	BA03G22010		Poh0249830	Poh0266690			Hypnum@jg6144.t1		Entodon@jg18243.t1			Sc_g03766	CepurR40.3G249300		CepurGG1@3G250000.1		Pp3c11_25930	Pp3c7_400			10	scaffold-HRWG-2017122-Buxbaumia_aphylla	cluster_0742	ABK2
abk2g01575	BA03G22000		Poh0249820	Poh0266700			Hypnum@jg6146.t1		Entodon@jg18241.t1			Sc_g03765	CepurR40.3G249200		CepurGG1@3G249800.1		Pp3c11_25950	Pp3c7_395			10	scaffold-AWOI-2009320-Diphyscium_foliosum	cluster_0743	ABK2
abk2g01654	BA03G11900		Poh0249670		Poh0266790		Hypnum@jg5574.t1		Entodon@jg18796.t1		Sc_g02954			CepurR40.3G087400		CepurGG1@3G089200.1	Pp3c11_26760	Pp3c7_5080			10	scaffold-AWOI-2072399-Diphyscium_foliosum	cluster_0744	ABK2
abk2g01655	BA03G11920		Poh0249680		Poh0266780		Hypnum@jg5575.t1		Entodon@jg18797.t1		Sc_g02956			CepurR40.3G087200		CepurGG1@3G089000.1	Pp3c11_26750	Pp3c7_5100			10	scaffold-HRWG-2009686-Buxbaumia_aphylla	cluster_0745	ABK2
abk2g01653	BA03G11920		Poh0249680		Poh0266780		Hypnum@jg5575.t1		Entodon@jg18797.t1		Sc_g02956			CepurR40.3G087200		CepurGG1@3G089000.1	Pp3c11_26740	Pp3c7_5100			10	scaffold-HRWG-2009686-Buxbaumia_aphylla	cluster_0746	ABK2
abk2g01656	BA03G11900		Poh0249670		Poh0266790		Hypnum@jg5574.t1		Entodon@jg18796.t1		Sc_g02954			CepurR40.3G087400		CepurGG1@3G089200.1	Pp3c11_26760	Pp3c7_5080			10	scaffold-HRWG-2014972-Buxbaumia_aphylla	cluster_0747	ABK2
abk3g02478	BA02G00750		Poh0045240	Poh0217380	Poh0123890	Poh0229110	Hypnum@jg13495.t1		Entodon@jg9956.t1		Sc_g00433	Sc_g05289	CepurR40.1G005700	CepurR40.4G110100	CepurGG1@1G004400.1	CepurGG1@4G109700.1	Pp3c3_340				14	scaffold-AWOI-2013111-Diphyscium_foliosum	cluster_0748	ABK3
abk3g02966	BA02G00710		Poh0045280	Poh0217330								Sc_g05291	CepurR40.1G005900	CepurR40.4G110500	CepurGG1@1G004600.1	CepurGG1@4G110200.1	Pp3c3_430	Pp3c13_7030			10	scaffold-AWOI-2068386-Diphyscium_foliosum	cluster_0749	ABK3
abk3g02981	BA02G00660		Poh0045330	Poh0217290	Poh0123940	Poh0229060	Hypnum@jg13490.t1		Entodon@jg9954.t1		Sc_g00431	Sc_g05298	CepurR40.1G006300	CepurR40.4G110900	CepurGG1@1G005100.1	CepurGG1@4G110400.1	Pp3c3_490	Pp3c13_7010			15	scaffold-AWOI-2071652-Diphyscium_foliosum	cluster_0750	ABK3
abk3g03000	BA02G00660		Poh0045330	Poh0217290	Poh0123940	Poh0229060	Hypnum@jg13490.t1		Entodon@jg9954.t1		Sc_g00431	Sc_g05298	CepurR40.1G006300	CepurR40.4G111700	CepurGG1@1G005100.1	CepurGG1@4G111200.1	Pp3c3_500	Pp3c13_7010			15	scaffold-AWOI-2071652-Diphyscium_foliosum	cluster_0751	ABK3
abk3g03012	BA02G00650		Poh0045340	Poh0217280	Poh0123980	Poh0229030	Hypnum@jg13489.t1		Entodon@jg9953.t1		Sc_g00430	Sc_g05295	CepurR40.1G006500	CepurR40.4G111800	CepurGG1@1G005300.1	CepurGG1@4G111300.1	Pp3c3_510	Pp3c13_7000			15	scaffold-AWOI-2072820-Diphyscium_foliosum	cluster_0752	ABK3
abk3g03222	BA02G00590	BA05G16550	Poh0045400	Poh0217240	Poh0347020	Poh0326080	Hypnum@jg13478.t1		Entodon@jg9945.t1		Sc_g00438		CepurR40.1G007000	CepurR40.4G053900	CepurGG1@1G005800.1	CepurGG1@4G051100.1	Pp3c3_660	Pp3c13_7110			15	scaffold-AWOI-2013601-Diphyscium_foliosum	cluster_0753	ABK3
abk3g03297	BA02G00490	BA05G16400	Poh0045470	Poh0217160	Poh0347180	Poh0326230	Hypnum@jg13470.t1		Entodon@jg9936.t1		Sc_g00426		CepurR40.1G008500	CepurR40.4G052700	CepurGG1@1G007300.1	CepurGG1@4G049900.1	Pp3c3_810	Pp3c13_2080			15	scaffold-AWOI-2072473-Diphyscium_foliosum	cluster_0754	ABK3
abk3g03313	BA02G00470		Poh0045510	Poh0217130			Hypnum@jg13461.t1		Entodon@jg9931.t1		Sc_g00422		CepurR40.1G008100		CepurGG1@1G007100.1		Pp3c3_830	Pp3c13_2130			10	scaffold-HRWG-2009254-Buxbaumia_aphylla	cluster_0755	ABK3
abk3g03398	BA02G00420		Poh0045570	Poh0217090			Hypnum@jg13448.t1		Entodon@jg9921.t1		Sc_g00418		CepurR40.1G009600		CepurGG1@1G008400.1		Pp3c3_920	Pp3c13_2030			10	scaffold-HRWG-2015440-Buxbaumia_aphylla	cluster_0756	ABK3
abk3g03403	BA02G00420		Poh0045570	Poh0217090			Hypnum@jg13448.t1		Entodon@jg9921.t1		Sc_g00418		CepurR40.1G009600		CepurGG1@1G008400.1		Pp3c3_920	Pp3c13_2030			10	scaffold-HRWG-2015440-Buxbaumia_aphylla	cluster_0757	ABK3
abk3g00027	BA02G00410	BA05G16530	Poh0045590	Poh0217070	Poh0347070	Poh0326150	Hypnum@jg13450.t1		Entodon@jg9922.t1		Sc_g00417		CepurR40.1G009400		CepurGG1@1G008500.1		Pp3c3_1020				12	scaffold-AWOI-2072100-Diphyscium_foliosum	cluster_0758	ABK3
abk3g00107	BA02G00400		Poh0045600	Poh0217060			Hypnum@jg13451.t1		Entodon@jg9923.t1		Sc_g00410		CepurR40.1G009300		CepurGG1@1G008600.1		Pp3c3_1090	Pp3c13_1900			10	scaffold-AWOI-2071951-Diphyscium_foliosum	cluster_0759	ABK3
abk3g00139	BA02G00380		Poh0045620	Poh0217040			Hypnum@jg13452.t1		Entodon@jg9924.t1		Sc_g00411		CepurR40.1G009200		CepurGG1@1G008700.1		Pp3c3_1110	Pp3c13_1880			10	scaffold-HRWG-2001702-Buxbaumia_aphylla	cluster_0760	ABK3
abk3g00221	BA02G00370	BA05G16490	Poh0045630	Poh0217030	Poh0347080	Poh0326160					Sc_g00412		CepurR40.1G010000		CepurGG1@1G008800.1		Pp3c3_1140				10	scaffold-AWOI-2067008-Diphyscium_foliosum	cluster_0761	ABK3
abk3g00238	BA02G00360		Poh0045640	Poh0217020			Hypnum@jg13439.t1		Entodon@jg9914.t1		Sc_g00413		CepurR40.1G010100		CepurGG1@1G008900.1		Pp3c3_1160	Pp3c13_1740			10	scaffold-HRWG-2010961-Buxbaumia_aphylla	cluster_0762	ABK3
abk3g00241	BA02G00350		Poh0045640	Poh0217010			Hypnum@jg13438.t1		Entodon@jg9913.t1		Sc_g00414		CepurR40.1G010300		CepurGG1@1G009000.1		Pp3c3_1164	Pp3c13_1670			10	scaffold-HRWG-2010640-Buxbaumia_aphylla	cluster_0763	ABK3
abk3g00607	BA02G00260		Poh0045740	Poh0216880			Hypnum@jg13425.t1		Entodon@jg9912.t1			Sc_g00377	CepurR40.1G011600		CepurGG1@1G010800.1		Pp3c3_1510	Pp3c13_1440			10	scaffold-HRWG-2017398-Buxbaumia_aphylla	cluster_0764	ABK3
abk3g00697	BA02G00180		Poh0045830	Poh0216820			Hypnum@jg13414.t1		Entodon@jg9897.t1		Sc_g00399		CepurR40.1G012000		CepurGG1@1G011100.1		Pp3c3_1570	Pp3c13_1360			10	scaffold-AWOI-2073508-Diphyscium_foliosum	cluster_0765	ABK3
abk3g00749	BA02G00020		Poh0045930	Poh0216720			Hypnum@jg13407.t1		Entodon@jg9891.t1		Sc_g00407		CepurR40.1G012700		CepurGG1@1G012200.1		Pp3c3_1630	Pp3c13_1310			10	scaffold-AWOI-2013095-Diphyscium_foliosum	cluster_0766	ABK3
abk3g00955	BA02G00980		Poh0043290		Poh0127000					Entodon@jg4334.t1			CepurR40.4G020700	CepurR40.1G002300	CepurGG1@4G018600.1	CepurGG1@1G001200.1	Pp3c3_1820	Pp3c13_5280			10	scaffold-HRWG-2070364-Buxbaumia_aphylla	cluster_0767	ABK3
abk3g00995		BA05G14300			Poh0126730	Poh0232210	Hypnum@jg23810.t1			Entodon@jg4356.t1		Sc_g00375		CepurR40.1G001500		CepurGG1@1G000800.1	Pp3c3_1860	Pp3c13_5370			10	scaffold-AWOI-2014403-Diphyscium_foliosum	cluster_0768	ABK3
abk3g01294	BA02G01940	BA05G14440	Poh0043370	Poh0362980	Poh0126660	Poh0232130	Hypnum@jg12611.t1		Entodon@jg10247.t1			Sc_g00368	CepurR40.1G014400		CepurGG1@1G013500.1		Pp3c3_2140	Pp3c13_5660			13	scaffold-AWOI-2069946-Diphyscium_foliosum	cluster_0769	ABK3
abk3g01322	BA02G01930		Poh0043380	Poh0362970		Poh0232300	Hypnum@jg12612.t1		Entodon@jg10248.t1			Sc_g00367	CepurR40.1G014300		CepurGG1@1G013400.1		Pp3c3_2160	Pp3c13_5650			11	scaffold-AWOI-2008854-Diphyscium_foliosum	cluster_0770	ABK3
abk3g01340	BA02G01900	BA05G14430	Poh0043390	Poh0362960	Poh0126680	Poh0232300	Hypnum@jg12616.t1		Entodon@jg10252.t1	Entodon@jg4360.t1		Sc_g00366	CepurR40.1G014200		CepurGG1@1G013300.1		Pp3c3_2190	Pp3c13_5590			14	scaffold-AWOI-2072124-Diphyscium_foliosum	cluster_0771	ABK3
abk3g01381	BA02G01890		Poh0043410	Poh0362940			Hypnum@jg12621.t1		Entodon@jg10255.t1			Sc_g00364	CepurR40.1G014000		CepurGG1@1G013000.1		Pp3c3_2220	Pp3c13_5550			10	scaffold-AWOI-2009296-Diphyscium_foliosum	cluster_0772	ABK3
abk3g01485	BA02G01730		Poh0044640	Poh0217960			Hypnum@jg13331.t1		Entodon@jg10129.t1		Sc_g00787			CepurR40.1G018800		CepurGG1@1G018100.1	Pp3c3_2330	Pp3c13_6156			10	scaffold-AWOI-2068155-Diphyscium_foliosum	cluster_0773	ABK3
abk3g01626	BA02G01610	BA05G17470	Poh0044460	Poh0218120	Poh0345970	Poh0325040	Hypnum@jg13310.t1	Hypnum@jg24256.t1	Entodon@jg10155.t1	Entodon@jg3974.t1	Sc_g00773			CepurR40.1G020400		CepurGG1@1G019100.1	Pp3c3_2430				14	scaffold-AWOI-2003392-Diphyscium_foliosum	cluster_0774	ABK3
abk3g01658			Poh0044480	Poh0218100	Poh0345980	Poh0325050	Hypnum@jg13307.t1	Hypnum@jg24257.t1	Entodon@jg10149.t1	Entodon@jg3972.t1	Sc_g00771			CepurR40.1G020700		CepurGG1@1G019400.1	Pp3c3_2470	Pp3c13_6470			13	scaffold-HRWG-2017305-Buxbaumia_aphylla	cluster_0775	ABK3
abk3g01930	BA02G01570		Poh0044580	Poh0218000			Hypnum@jg13291.t1		Entodon@jg10159.t1		Sc_g00742			CepurR40.1G022500		CepurGG1@1G021300.1	Pp3c3_2760	Pp3c13_6760			10	scaffold-HRWG-2007307-Buxbaumia_aphylla	cluster_0776	ABK3
abk3g01974	BA02G01560		Poh0044590				Hypnum@jg13289.t1		Entodon@jg10160.t1		Sc_g00743			CepurR40.1G022700		CepurGG1@1G021500.1	Pp3c3_2800	Pp3c13_5200	Pp3c4_30730		10	scaffold-AWOI-2004477-Diphyscium_foliosum	cluster_0777	ABK3
abk3g02179	BA02G01450		Poh0218320		Poh0044300		Hypnum@jg12579.t1		Entodon@jg10221.t1		Sc_g00734			CepurR40.1G024100		CepurGG1@1G023200.1	Pp3c3_3050		Pp3c4_30670		10	scaffold-AWOI-2072316-Diphyscium_foliosum	cluster_0778	ABK3
abk3g02209	BA02G01430		Poh0218300		Poh0044320		Hypnum@jg12577.t1		Entodon@jg10219.t1		Sc_g00739			CepurR40.1G025000		CepurGG1@1G023800.1	Pp3c3_3090	Pp3c13_4900			10	scaffold-AWOI-2070954-Diphyscium_foliosum	cluster_0779	ABK3
abk3g02235	BA02G01400	BA05G17160	Poh0218280	Poh0324750	Poh0044340		Hypnum@jg12571.t1				Sc_g00732		CepurR40.4G004600	CepurR40.1G025400	CepurGG1@4G004200.1	CepurGG1@1G024200.1	Pp3c3_3110	Pp3c13_5000	Pp3c4_30600	Pp3c26_11450	15	scaffold-AWOI-2014189-Diphyscium_foliosum	cluster_0780	ABK3
abk3g02250	BA02G01380		Poh0218260		Poh0044360		Hypnum@jg12568.t1		Entodon@jg10215.t1		Sc_g00766			CepurR40.1G025600		CepurGG1@1G024500.1	Pp3c3_3140	Pp3c13_5060			10	scaffold-AWOI-2071969-Diphyscium_foliosum	cluster_0781	ABK3
abk3g02270	BA02G01380		Poh0218260		Poh0044360		Hypnum@jg12568.t1		Entodon@jg10215.t1		Sc_g00766			CepurR40.1G025600		CepurGG1@1G024500.1	Pp3c3_3160	Pp3c13_5060			10	scaffold-AWOI-2071969-Diphyscium_foliosum	cluster_0782	ABK3
abk3g02298	BA02G01350		Poh0218220		Poh0044400		Hypnum@jg12561.t1		Entodon@jg10209.t1		Sc_g00756			CepurR40.1G026200		CepurGG1@1G025000.1	Pp3c3_3180	Pp3c13_4760	Pp3c4_30530	Pp3c26_11480	12	scaffold-AWOI-2008750-Diphyscium_foliosum	cluster_0783	ABK3
abk3g02337	BA02G01340		Poh0218200		Poh0044410		Hypnum@jg12555.t1		Entodon@jg10203.t1		Sc_g00755			CepurR40.1G026500		CepurGG1@1G025300.1	Pp3c3_3220			Pp3c26_11540	10	scaffold-AWOI-2070727-Diphyscium_foliosum	cluster_0784	ABK3
abk3g02343	BA02G01260	BA05G17130	Poh0218050	Poh0324810	Poh0044540		Hypnum@jg12542.t1	Hypnum@jg24287.t1	Entodon@jg10195.t1	Entodon@jg3932.t1				CepurR40.1G027500		CepurGG1@1G026300.1	Pp3c3_3230		Pp3c4_30220	Pp3c26_11670	14	scaffold-HRWG-2004019-Buxbaumia_aphylla	cluster_0785	ABK3
abk3g02479		BA05G17000	Poh0346900	Poh0325980			Hypnum@jg24122.t1		Entodon@jg4083.t1		Sc_g05157		CepurR40.4G018600		CepurGG1@4G016500.1		Pp3c3_3400	Pp3c13_8430			10	scaffold-AWOI-2073280-Diphyscium_foliosum	cluster_0786	ABK3
abk3g02483		BA05G17010	Poh0346890	Poh0325970			Hypnum@jg24124.t1		Entodon@jg4084.t1		Sc_g05155		CepurR40.4G018400		CepurGG1@4G016300.1		Pp3c3_3420	Pp3c13_8420			10	scaffold-AWOI-2070140-Diphyscium_foliosum	cluster_0787	ABK3
abk3g02502			Poh0346870	Poh0325950			Hypnum@jg24119.t1		Entodon@jg4081.t1		Sc_g05164		CepurR40.4G018200		CepurGG1@4G016100.1		Pp3c3_3450	Pp3c13_8390	Pp3c4_30010		10	#N/A	cluster_0788	ABK3
abk3g02632	BA02G01170		Poh0346840	Poh0325920			Hypnum@jg24111.t1	Hypnum@jg13339.t1	Entodon@jg4075.t1	Entodon@jg10117.t1	Sc_g05161		CepurR40.4G017500	CepurR40.1G030100	CepurGG1@4G015600.1	CepurGG1@1G028200.1	Pp3c3_3540	Pp3c13_8320			14	scaffold-AWOI-2014840-Diphyscium_foliosum	cluster_0789	ABK3
abk3g02664	BA02G01130				Poh0044240	Poh0212860		Hypnum@jg13340.t1		Entodon@jg10118.t1	Sc_g05167		CepurR40.4G017000		CepurGG1@4G015100.1		Pp3c3_3580	Pp3c13_8290			10	scaffold-AWOI-2009376-Diphyscium_foliosum	cluster_0790	ABK3
abk3g02704	BA02G01120	BA05G16740	Poh0346800	Poh0325890	Poh0044260	Poh0212870	Hypnum@jg24107.t1		Entodon@jg4071.t1	Entodon@jg10122.t1	Sc_g05168	Sc_g00490	CepurR40.4G016800	CepurR40.1G030800	CepurGG1@4G014900.1	CepurGG1@1G028700.1	Pp3c3_3640	Pp3c13_8280			17	scaffold-AWOI-2070684-Diphyscium_foliosum	cluster_0791	ABK3
abk3g02939	BA02G01140				Poh0044110	Poh0212720		Hypnum@jg13351.t1		Entodon@jg10108.t1		Sc_g00500	CepurR40.4G016200	CepurR40.1G031600	CepurGG1@4G014500.1	CepurGG1@1G029300.1	Pp3c3_3850	Pp3c13_8100			12	scaffold-HRWG-2006029-Buxbaumia_aphylla	cluster_0792	ABK3
abk3g02940		BA05G16610			Poh0044120	Poh0212730		Hypnum@jg13352.t1	Entodon@jg4053.t1	Entodon@jg10107.t1		Sc_g00499	CepurR40.4G016100	CepurR40.1G031800	CepurGG1@4G014400.1	CepurGG1@1G029500.1	Pp3c3_3840		Pp3c4_29860		13	scaffold-AWOI-2014665-Diphyscium_foliosum	cluster_0793	ABK3
abk3g02942	BA02G01140				Poh0044110	Poh0212720		Hypnum@jg13351.t1		Entodon@jg10108.t1		Sc_g00500	CepurR40.4G016200	CepurR40.1G031600	CepurGG1@4G014500.1	CepurGG1@1G029300.1	Pp3c3_3850	Pp3c13_8100			12	scaffold-HRWG-2006029-Buxbaumia_aphylla	cluster_0794	ABK3
abk3g02955		BA05G16680	Poh0346770	Poh0325860			Hypnum@jg24092.t1		Entodon@jg4062.t1		Sc_g05626		CepurR40.4G014300		CepurGG1@4G013100.1		Pp3c3_4090	Pp3c13_7910	Pp3c26_12100		11	scaffold-AWOI-2007577-Diphyscium_foliosum	cluster_0795	ABK3
abk3g02960			Poh0346460	Poh0325710			Hypnum@jg24197.t1		Entodon@jg4022.t1		Sc_g05618		CepurR40.4G009600	CepurR40.1G035500	CepurGG1@4G008900.1	CepurGG1@1G033300.1	Pp3c3_4160				10	scaffold-AWOI-2072047-Diphyscium_foliosum	cluster_0796	ABK3
abk3g02965		BA02G04280	Poh0346470	Poh0325690	Poh0044800	Poh0217830	Hypnum@jg24200.t1	Hypnum@jg13564.t1	Entodon@jg4019.t1	Entodon@jg10025.t1	Sc_g05617	Sc_g00477	CepurR40.4G009800	CepurR40.1G035700	CepurGG1@4G009000.1	CepurGG1@1G033700.1	Pp3c3_4270	Pp3c13_7640	Pp3c26_12570		18	scaffold-AWOI-2002717-Diphyscium_foliosum	cluster_0797	ABK3
abk3g02967		BA02G04290	Poh0346480	Poh0325680	Poh0044790	Poh0217840	Hypnum@jg24201.t1	Hypnum@jg13563.t1	Entodon@jg4018.t1	Entodon@jg10026.t1	Sc_g05620	Sc_g00476	CepurR40.4G009900	CepurR40.1G035800	CepurGG1@4G009100.1	CepurGG1@1G033800.1	Pp3c3_4330	Pp3c13_7636	Pp3c26_12600		18	scaffold-AWOI-2004634-Diphyscium_foliosum	cluster_0798	ABK3
abk3g02978		BA02G04130			Poh0044830	Poh0217800		Hypnum@jg13555.t1		Entodon@jg10035.t1	Sc_g05635	Sc_g00472	CepurR40.4G012100	CepurR40.1G036200	CepurGG1@4G011100.1	CepurGG1@1G034200.1	Pp3c3_4850		Pp3c26_12660		13	scaffold-HRWG-2005869-Buxbaumia_aphylla	cluster_0799	ABK3
abk3g02980	BA05G17880	BA02G04120	Poh0346540	Poh0325620	Poh0044840	Poh0217780	Hypnum@jg24189.t1	Hypnum@jg13553.t1	Entodon@jg4034.t1	Entodon@jg10037.t1	Sc_g05638		CepurR40.4G011500		CepurGG1@4G010600.1		Pp3c3_4891		Pp3c26_12730		15	scaffold-AWOI-2072692-Diphyscium_foliosum	cluster_0800	ABK3
abk3g02991	BA05G17890	BA02G04110	Poh0346550	Poh0325610	Poh0044850	Poh0217770	Hypnum@jg24188.t1	Hypnum@jg13551.t1	Entodon@jg4035.t1	Entodon@jg10038.t1	Sc_g05639		CepurR40.4G011400		CepurGG1@4G010500.1		Pp3c3_4950				14	scaffold-AWOI-2072974-Diphyscium_foliosum	cluster_0801	ABK3
abk3g02996	BA05G17890	BA02G04110	Poh0346550	Poh0325610	Poh0044850	Poh0217770	Hypnum@jg24188.t1	Hypnum@jg13551.t1	Entodon@jg4035.t1	Entodon@jg10038.t1	Sc_g05639		CepurR40.4G011400		CepurGG1@4G010500.1		Pp3c3_4950				14	scaffold-HRWG-2008926-Buxbaumia_aphylla	cluster_0802	ABK3
abk3g02997	BA05G17890	BA02G04110	Poh0346550		Poh0044850	Poh0217770	Hypnum@jg24188.t1	Hypnum@jg13551.t1	Entodon@jg4035.t1	Entodon@jg10038.t1	Sc_g05639		CepurR40.4G011400		CepurGG1@4G010500.1		Pp3c3_4950				13	scaffold-HRWG-2008926-Buxbaumia_aphylla	cluster_0803	ABK3
abk3g03001	BA05G17940		Poh0346610	Poh0325530	Poh0044870	Poh0217740		Hypnum@jg13548.t1			Sc_g05642		CepurR40.4G010700		CepurGG1@4G010000.1		Pp3c3_5010				10	scaffold-AWOI-2002271-Diphyscium_foliosum	cluster_0804	ABK3
abk3g03005		BA02G04090	Poh0346620	Poh0325520	Poh0044910	Poh0217720	Hypnum@jg24179.t1	Hypnum@jg13547.t1	Entodon@jg4045.t1	Entodon@jg10040.t1			CepurR40.4G010600		CepurGG1@4G009900.1		Pp3c3_5040				12	scaffold-AWOI-2002158-Diphyscium_foliosum	cluster_0805	ABK3
abk3g03060	BA02G04410		Poh0046760	Poh0215740			Hypnum@jg12414.t1		Entodon@jg10962.t1				CepurR40.1G075800	CepurR40.4G063200	CepurGG1@1G073600.1	CepurGG1@4G055400.1	Pp3c3_5470				10	scaffold-AWOI-2008135-Diphyscium_foliosum	cluster_0806	ABK3
abk3g03066	BA02G04410		Poh0046760	Poh0215740			Hypnum@jg12414.t1		Entodon@jg10962.t1				CepurR40.1G075800	CepurR40.4G063200	CepurGG1@1G073600.1	CepurGG1@4G055400.1	Pp3c3_5470				10	scaffold-AWOI-2008135-Diphyscium_foliosum	cluster_0807	ABK3
abk3g03067	BA02G04410		Poh0046760	Poh0215740			Hypnum@jg12414.t1		Entodon@jg10962.t1				CepurR40.1G075800	CepurR40.4G063200	CepurGG1@1G073600.1	CepurGG1@4G055400.1	Pp3c3_5470				10	scaffold-AWOI-2008135-Diphyscium_foliosum	cluster_0808	ABK3
abk3g03068	BA02G04430		Poh0046750	Poh0215750			Hypnum@jg12415.t1		Entodon@jg10961.t1		Sc_g00897		CepurR40.1G075900	CepurR40.4G063400	CepurGG1@1G074000.1	CepurGG1@4G055100.1	Pp3c3_5540				11	scaffold-AWOI-2072094-Diphyscium_foliosum	cluster_0809	ABK3
abk3g03069	BA02G04430		Poh0046750	Poh0215750			Hypnum@jg12415.t1		Entodon@jg10961.t1		Sc_g00897		CepurR40.1G075900	CepurR40.4G063400	CepurGG1@1G074000.1	CepurGG1@4G055100.1	Pp3c3_5540				11	scaffold-AWOI-2072094-Diphyscium_foliosum	cluster_0810	ABK3
abk3g03072	BA02G04410		Poh0046760	Poh0215740			Hypnum@jg12414.t1		Entodon@jg10962.t1				CepurR40.1G075800	CepurR40.4G063200	CepurGG1@1G073600.1	CepurGG1@4G055400.1	Pp3c3_5470				10	scaffold-AWOI-2008135-Diphyscium_foliosum	cluster_0811	ABK3
abk3g03073	BA02G04410		Poh0046760	Poh0215740			Hypnum@jg12414.t1		Entodon@jg10962.t1				CepurR40.1G075800	CepurR40.4G063200	CepurGG1@1G073600.1	CepurGG1@4G055400.1	Pp3c3_5470				10	scaffold-AWOI-2008135-Diphyscium_foliosum	cluster_0812	ABK3
abk3g03074	BA02G04410		Poh0046760	Poh0215740			Hypnum@jg12414.t1		Entodon@jg10962.t1				CepurR40.1G075800	CepurR40.4G063200	CepurGG1@1G073900.1	CepurGG1@4G055400.1	Pp3c3_5470				10	scaffold-AWOI-2008135-Diphyscium_foliosum	cluster_0813	ABK3
abk3g03075	BA02G04440	BA05G16120	Poh0046740	Poh0215760				Hypnum@jg23950.t1		Entodon@jg4244.t1			CepurR40.1G076200	CepurR40.4G063600	CepurGG1@1G074300.1	CepurGG1@4G055000.1			Pp3c12_9300		11	scaffold-AWOI-2073115-Diphyscium_foliosum	cluster_0814	ABK3
abk3g03079	BA02G04450	BA05G16110	Poh0046730	Poh0215770				Hypnum@jg23949.t1		Entodon@jg4243.t1	Sc_g00895		CepurR40.1G076300		CepurGG1@1G074400.1				Pp3c12_9310		10	scaffold-AWOI-2066660-Diphyscium_foliosum	cluster_0815	ABK3
abk3g03083		BA05G16100	Poh0046720	Poh0215780				Hypnum@jg23948.t1		Entodon@jg4241.t1	Sc_g00896		CepurR40.1G076400		CepurGG1@1G074500.1		Pp3c3_5550	Pp3c13_2360	Pp3c12_9320		11	scaffold-HRWG-2003212-Buxbaumia_aphylla	cluster_0816	ABK3
abk3g03086	BA02G04430		Poh0046750	Poh0215750			Hypnum@jg12415.t1		Entodon@jg10961.t1		Sc_g00897		CepurR40.1G075900	CepurR40.4G063400	CepurGG1@1G074000.1	CepurGG1@4G055100.1	Pp3c3_5540	Pp3c13_2370			12	scaffold-AWOI-2072094-Diphyscium_foliosum	cluster_0817	ABK3
abk3g03087	BA02G04450	BA05G16110	Poh0046730	Poh0215770	Poh0347370	Poh0326500		Hypnum@jg23949.t1		Entodon@jg4243.t1	Sc_g00895		CepurR40.1G076300		CepurGG1@1G074400.1				Pp3c12_9310		12	scaffold-AWOI-2066660-Diphyscium_foliosum	cluster_0818	ABK3
abk3g03088	BA02G04440	BA05G16120	Poh0046740	Poh0215760	Poh0347380	Poh0326510		Hypnum@jg23950.t1		Entodon@jg4244.t1			CepurR40.1G076200	CepurR40.4G063600	CepurGG1@1G074300.1	CepurGG1@4G055000.1			Pp3c12_9300		13	scaffold-AWOI-2073115-Diphyscium_foliosum	cluster_0819	ABK3
abk3g03090	BA02G04430		Poh0046750	Poh0215750		Poh0326520	Hypnum@jg12415.t1		Entodon@jg10961.t1		Sc_g00897		CepurR40.1G075900	CepurR40.4G063400	CepurGG1@1G074000.1	CepurGG1@4G055100.1	Pp3c3_5540	Pp3c13_2370			13	scaffold-AWOI-2072094-Diphyscium_foliosum	cluster_0820	ABK3
abk3g03091		BA05G16100	Poh0046720	Poh0215780	Poh0347360	Poh0326490		Hypnum@jg23948.t1		Entodon@jg4241.t1	Sc_g00896		CepurR40.1G076400		CepurGG1@1G074500.1		Pp3c3_5550	Pp3c13_2360	Pp3c12_9320		13	scaffold-AWOI-2009144-Diphyscium_foliosum	cluster_0821	ABK3
abk3g03094		BA05G16100	Poh0046720	Poh0215780	Poh0347360	Poh0326490		Hypnum@jg23948.t1		Entodon@jg4241.t1	Sc_g00896		CepurR40.1G076400		CepurGG1@1G074500.1		Pp3c3_5550	Pp3c13_2360	Pp3c12_9320		13	scaffold-HRWG-2003212-Buxbaumia_aphylla	cluster_0822	ABK3
abk3g03095	BA02G04470		Poh0046700	Poh0215810	Poh0347340	Poh0326480							CepurR40.1G076700	CepurR40.4G063800	CepurGG1@1G074800.1	CepurGG1@4G054800.1	Pp3c3_5570	Pp3c13_2340			11	scaffold-HRWG-2017129-Buxbaumia_aphylla	cluster_0823	ABK3
abk3g03096		BA05G16100	Poh0046720	Poh0215780	Poh0347360	Poh0326490		Hypnum@jg23948.t1		Entodon@jg4241.t1	Sc_g00896		CepurR40.1G076400		CepurGG1@1G074500.1		Pp3c3_5550	Pp3c13_2360	Pp3c12_9320		13	scaffold-HRWG-2003212-Buxbaumia_aphylla	cluster_0824	ABK3
abk3g03108	BA02G04470		Poh0046700	Poh0215810	Poh0347340	Poh0326480							CepurR40.1G076700	CepurR40.4G063800	CepurGG1@1G074800.1	CepurGG1@4G054800.1	Pp3c3_5570	Pp3c13_2340			11	scaffold-HRWG-2017129-Buxbaumia_aphylla	cluster_0825	ABK3
abk3g03115	BA02G04540		Poh0046660	Poh0215850			Hypnum@jg12427.t1		Entodon@jg10955.t1		Sc_g00889		CepurR40.1G077100		CepurGG1@1G075200.1		Pp3c3_5590	Pp3c13_2300			10	scaffold-AWOI-2073319-Diphyscium_foliosum	cluster_0826	ABK3
abk3g03117	BA02G04540		Poh0046660	Poh0215850			Hypnum@jg12427.t1		Entodon@jg10955.t1		Sc_g00889		CepurR40.1G077100		CepurGG1@1G075200.1		Pp3c3_5590	Pp3c13_2300			10	scaffold-AWOI-2073319-Diphyscium_foliosum	cluster_0827	ABK3
abk3g03118	BA02G04540		Poh0046660	Poh0215850			Hypnum@jg12427.t1		Entodon@jg10955.t1		Sc_g00889		CepurR40.1G077100		CepurGG1@1G075200.1		Pp3c3_5590	Pp3c13_2300			10	scaffold-AWOI-2073319-Diphyscium_foliosum	cluster_0828	ABK3
abk3g03120	BA02G04540		Poh0046660	Poh0215850			Hypnum@jg12427.t1		Entodon@jg10955.t1		Sc_g00889		CepurR40.1G077100		CepurGG1@1G075200.1		Pp3c3_5590	Pp3c13_2300			10	scaffold-AWOI-2073319-Diphyscium_foliosum	cluster_0829	ABK3
abk3g03134			Poh0046610	Poh0215910			Hypnum@jg12440.t1		Entodon@jg10940.t1		Sc_g00855		CepurR40.1G079300		CepurGG1@1G077500.1	CepurGG1@4G053200.1	Pp3c3_5720	Pp3c13_2440			10	scaffold-HRWG-2004932-Buxbaumia_aphylla	cluster_0830	ABK3
abk3g03137			Poh0046610	Poh0215910			Hypnum@jg12440.t1		Entodon@jg10940.t1		Sc_g00855		CepurR40.1G079300		CepurGG1@1G077500.1	CepurGG1@4G053200.1	Pp3c3_5720	Pp3c13_2440			10	scaffold-AWOI-2013869-Diphyscium_foliosum	cluster_0831	ABK3
abk3g03140			Poh0046610	Poh0215910			Hypnum@jg12440.t1		Entodon@jg10940.t1		Sc_g00855		CepurR40.1G079300		CepurGG1@1G077500.1	CepurGG1@4G053200.1	Pp3c3_5720	Pp3c13_2440			10	scaffold-HRWG-2004932-Buxbaumia_aphylla	cluster_0832	ABK3
abk3g03142			Poh0046620	Poh0215900			Hypnum@jg12439.t1		Entodon@jg10941.t1		Sc_g00855		CepurR40.1G079200		CepurGG1@1G077400.1	CepurGG1@4G053200.1	Pp3c3_5720	Pp3c13_2400			10	scaffold-AWOI-2004532-Diphyscium_foliosum	cluster_0833	ABK3
abk3g03143			Poh0046610	Poh0215910			Hypnum@jg12440.t1		Entodon@jg10940.t1		Sc_g00855		CepurR40.1G079300		CepurGG1@1G077500.1	CepurGG1@4G053200.1	Pp3c3_5720	Pp3c13_2440			10	scaffold-AWOI-2004532-Diphyscium_foliosum	cluster_0834	ABK3
abk3g03144			Poh0046620	Poh0215890			Hypnum@jg12436.t1		Entodon@jg10942.t1		Sc_g00855		CepurR40.1G078200		CepurGG1@1G076300.1	CepurGG1@4G053200.1	Pp3c3_5720	Pp3c13_2400			10	scaffold-HRWG-2004932-Buxbaumia_aphylla	cluster_0835	ABK3
abk3g03145			Poh0046620	Poh0215900			Hypnum@jg12439.t1		Entodon@jg10941.t1		Sc_g00855		CepurR40.1G079200		CepurGG1@1G077400.1	CepurGG1@4G053200.1	Pp3c3_5720	Pp3c13_2420			10	scaffold-AWOI-2004532-Diphyscium_foliosum	cluster_0836	ABK3
abk3g03161	BA02G02460		Poh0046350	Poh0216290			Hypnum@jg12483.t1		Entodon@jg10893.t1		Sc_g00874		CepurR40.1G082400		CepurGG1@1G080800.1		Pp3c3_5940	Pp3c13_4010	Pp3c4_24980		11	scaffold-HRWG-2011781-Buxbaumia_aphylla	cluster_0837	ABK3
abk3g03167	BA02G02440	BA05G15560	Poh0046310	Poh0216340	Poh0232940		Hypnum@jg12490.t1		Entodon@jg10888.t1	Entodon@jg4189.t1	Sc_g00872	Sc_g05002	CepurR40.1G082000	CepurR40.4G066400	CepurGG1@1G080200.1	CepurGG1@4G064100.1	Pp3c3_5970	Pp3c13_4100	Pp3c4_25010		17	scaffold-AWOI-2014065-Diphyscium_foliosum	cluster_0838	ABK3
abk3g03168	BA02G02460		Poh0046350	Poh0216290			Hypnum@jg12483.t1		Entodon@jg10893.t1		Sc_g00874		CepurR40.1G082400		CepurGG1@1G080800.1		Pp3c3_5940	Pp3c13_4010	Pp3c4_24980		11	scaffold-HRWG-2011781-Buxbaumia_aphylla	cluster_0839	ABK3
abk3g03169	BA02G02460		Poh0046350	Poh0216290			Hypnum@jg12483.t1		Entodon@jg10893.t1		Sc_g00874		CepurR40.1G082400		CepurGG1@1G080800.1		Pp3c3_5940	Pp3c13_4010	Pp3c4_24980		11	scaffold-HRWG-2011781-Buxbaumia_aphylla	cluster_0840	ABK3
abk3g03174	BA02G02440	BA05G15540	Poh0046310	Poh0216340	Poh0232940		Hypnum@jg12490.t1		Entodon@jg10888.t1	Entodon@jg4189.t1	Sc_g00872	Sc_g05002	CepurR40.1G082000	CepurR40.4G066400	CepurGG1@1G080200.1	CepurGG1@4G064100.1	Pp3c3_5970	Pp3c13_4100	Pp3c4_25010		17	scaffold-AWOI-2014065-Diphyscium_foliosum	cluster_0841	ABK3
abk3g03176	BA02G02440	BA05G15540	Poh0046310	Poh0216340	Poh0232940		Hypnum@jg12490.t1		Entodon@jg10888.t1	Entodon@jg4189.t1	Sc_g00872	Sc_g05002	CepurR40.1G082000	CepurR40.4G066400	CepurGG1@1G080200.1	CepurGG1@4G064100.1	Pp3c3_5990	Pp3c13_4100	Pp3c4_25010		17	scaffold-AWOI-2014065-Diphyscium_foliosum	cluster_0842	ABK3
abk3g03183		BA05G15650	Poh0127330		Poh0232870		Hypnum@jg23981.t1	Hypnum@jg23899.t1		Entodon@jg4201.t1	Sc_g00878	Sc_g05000		CepurR40.4G067300		CepurGG1@4G064900.1	Pp3c3_6200		Pp3c4_24960		12	scaffold-AWOI-2069759-Diphyscium_foliosum	cluster_0843	ABK3
abk3g03184		BA05G15650	Poh0127330		Poh0232870		Hypnum@jg23981.t1	Hypnum@jg23899.t1		Entodon@jg4201.t1	Sc_g00878	Sc_g05000		CepurR40.4G067300		CepurGG1@4G064900.1	Pp3c3_6200		Pp3c4_24960		12	scaffold-AWOI-2069759-Diphyscium_foliosum	cluster_0844	ABK3
abk3g03185	BA02G02500	BA05G15630	Poh0127350		Poh0232890		Hypnum@jg23979.t1			Entodon@jg4198.t1		Sc_g04999	CepurR40.1G083100	CepurR40.4G067200	CepurGG1@1G081500.1	CepurGG1@4G064800.1	Pp3c3_6140		Pp3c4_24810		13	scaffold-AWOI-2071681-Diphyscium_foliosum	cluster_0845	ABK3
abk3g03186		BA05G15640	Poh0127340		Poh0232880		Hypnum@jg23978.t1			Entodon@jg4200.t1	Sc_g00876		CepurR40.1G083200		CepurGG1@1G081600.1			Pp3c13_3890	Pp3c4_24790		10	scaffold-AWOI-2013373-Diphyscium_foliosum	cluster_0846	ABK3
abk3g03189	BA02G02500	BA05G15630	Poh0127350		Poh0232890		Hypnum@jg23979.t1			Entodon@jg4198.t1		Sc_g04999	CepurR40.1G083100	CepurR40.4G067200	CepurGG1@1G081500.1	CepurGG1@4G064800.1	Pp3c3_6140		Pp3c4_24810		13	scaffold-HRWG-2006138-Buxbaumia_aphylla	cluster_0847	ABK3
abk3g03190	BA02G02500	BA05G15630	Poh0127350		Poh0232890		Hypnum@jg23979.t1			Entodon@jg4198.t1		Sc_g04999	CepurR40.1G083100	CepurR40.4G067200	CepurGG1@1G081500.1	CepurGG1@4G064800.1	Pp3c3_6140		Pp3c4_24810		13	scaffold-AWOI-2071681-Diphyscium_foliosum	cluster_0848	ABK3
abk3g03191	BA02G02500	BA05G15630	Poh0127350		Poh0232890		Hypnum@jg23979.t1			Entodon@jg4198.t1		Sc_g04999	CepurR40.1G083100	CepurR40.4G067200	CepurGG1@1G081500.1	CepurGG1@4G064800.1	Pp3c3_6140		Pp3c4_24810		13	scaffold-AWOI-2071681-Diphyscium_foliosum	cluster_0849	ABK3
abk3g03192		BA05G15620	Poh0127360		Poh0232900		Hypnum@jg23981.t1	Hypnum@jg23899.t1		Entodon@jg4197.t1	Sc_g00878	Sc_g05000		CepurR40.4G067100		CepurGG1@4G064700.1	Pp3c3_6160	Pp3c13_3880	Pp3c4_24960		13	scaffold-AWOI-2069759-Diphyscium_foliosum	cluster_0850	ABK3
abk3g03195		BA05G15650	Poh0127330		Poh0232870		Hypnum@jg23981.t1			Entodon@jg4201.t1	Sc_g00878	Sc_g05000		CepurR40.4G067300		CepurGG1@4G064900.1	Pp3c3_6200	Pp3c13_3880			11	scaffold-AWOI-2069759-Diphyscium_foliosum	cluster_0851	ABK3
abk3g03200		BA05G15660	Poh0127320		Poh0232860			Hypnum@jg23903.t1		Entodon@jg4206.t1		Sc_g04996		CepurR40.4G067500		CepurGG1@4G065100.1	Pp3c3_6250	Pp3c13_3830			10	scaffold-HRWG-2012730-Buxbaumia_aphylla	cluster_0852	ABK3
abk3g03201		BA05G15650	Poh0127330		Poh0232870		Hypnum@jg23981.t1	Hypnum@jg23899.t1		Entodon@jg4201.t1		Sc_g05000		CepurR40.4G067300		CepurGG1@4G064900.1	Pp3c3_6200	Pp3c13_3880			11	scaffold-AWOI-2069759-Diphyscium_foliosum	cluster_0853	ABK3
abk3g03202		BA05G15660	Poh0127320		Poh0232860			Hypnum@jg23903.t1		Entodon@jg4206.t1		Sc_g04996		CepurR40.4G067500		CepurGG1@4G065100.1	Pp3c3_6250	Pp3c13_3830			10	scaffold-HRWG-2070001-Buxbaumia_aphylla	cluster_0854	ABK3
abk3g03211	BA02G02510	BA05G15690	Poh0127300				Hypnum@jg12476.t1	Hypnum@jg23909.t1	Entodon@jg10902.t1	Entodon@jg4211.t1			CepurR40.1G083400		CepurGG1@1G081800.1		Pp3c3_6420	Pp3c13_3710			11	scaffold-HRWG-2012730-Buxbaumia_aphylla	cluster_0855	ABK3
abk3g03215	BA02G02510	BA05G15690	Poh0127300				Hypnum@jg12476.t1	Hypnum@jg23909.t1	Entodon@jg10902.t1	Entodon@jg4211.t1			CepurR40.1G083400		CepurGG1@1G081800.1		Pp3c3_6420	Pp3c13_3710			11	scaffold-HRWG-2012730-Buxbaumia_aphylla	cluster_0856	ABK3
abk3g03221	BA02G02540		Poh0046430	Poh0216120			Hypnum@jg12468.t1	Hypnum@jg23920.t1	Entodon@jg10912.t1	Entodon@jg4216.t1	Sc_g00846		CepurR40.1G083900	CepurR40.4G069600	CepurGG1@1G082200.1	CepurGG1@4G070500.1	Pp3c3_6540				13	scaffold-HRWG-2010990-Buxbaumia_aphylla	cluster_0857	ABK3
abk3g03256	BA02G02160		Poh0045970	Poh0216680			Hypnum@jg13593.t1		Entodon@jg10002.t1		Sc_g00829		CepurR40.1G088700		CepurGG1@1G095600.1		Pp3c3_7180	Pp3c26_8740			10	scaffold-HRWG-2000766-Buxbaumia_aphylla	cluster_0858	ABK3
abk3g03257	BA02G02160		Poh0045970	Poh0216680			Hypnum@jg13593.t1		Entodon@jg10002.t1		Sc_g00829		CepurR40.1G088700		CepurGG1@1G095600.1		Pp3c3_7180	Pp3c26_8740			10	scaffold-HRWG-2000766-Buxbaumia_aphylla	cluster_0859	ABK3
abk3g03258	BA02G02170		Poh0045980	Poh0216680			Hypnum@jg13593.t1		Entodon@jg10000.t1		Sc_g00829		CepurR40.1G088400		CepurGG1@1G095400.1		Pp3c3_7160	Pp3c26_8740			10	scaffold-HRWG-2000766-Buxbaumia_aphylla	cluster_0860	ABK3
abk3g03262	BA02G02170		Poh0045980	Poh0216680			Hypnum@jg13593.t1		Entodon@jg10000.t1		Sc_g00829		CepurR40.1G088400		CepurGG1@1G095400.1		Pp3c3_7160	Pp3c26_8740			10	scaffold-HRWG-2000766-Buxbaumia_aphylla	cluster_0861	ABK3
abk3g03263	BA02G02170		Poh0045980	Poh0216680			Hypnum@jg13593.t1		Entodon@jg10000.t1		Sc_g00829		CepurR40.1G088400		CepurGG1@1G095400.1		Pp3c3_7160	Pp3c26_8740			10	scaffold-HRWG-2000766-Buxbaumia_aphylla	cluster_0862	ABK3
abk3g03264	BA02G02170		Poh0045980	Poh0216680			Hypnum@jg13593.t1		Entodon@jg10000.t1		Sc_g00829		CepurR40.1G088400		CepurGG1@1G095400.1		Pp3c3_7160	Pp3c26_8740			10	scaffold-HRWG-2000766-Buxbaumia_aphylla	cluster_0863	ABK3
abk3g03265	BA02G02160		Poh0045970	Poh0216680			Hypnum@jg13593.t1		Entodon@jg10002.t1		Sc_g00829		CepurR40.1G088700		CepurGG1@1G095600.1		Pp3c3_7180	Pp3c26_8740			10	scaffold-HRWG-2000766-Buxbaumia_aphylla	cluster_0864	ABK3
abk3g03286	BA02G05330	BA05G12500	Poh0048660	Poh0229210	Poh0213860	Poh0123790	Hypnum@jg11930.t1	Hypnum@jg23322.t1	Entodon@jg11419.t1	Entodon@jg4758.t1			CepurR40.1G042300		CepurGG1@1G040100.1		Pp3c3_7980				13	scaffold-HRWG-2012192-Buxbaumia_aphylla	cluster_0865	ABK3
abk3g03292	BA02G05330	BA05G12500	Poh0048660	Poh0229210	Poh0213860	Poh0123790	Hypnum@jg11930.t1	Hypnum@jg23322.t1	Entodon@jg11419.t1	Entodon@jg4758.t1			CepurR40.1G042300		CepurGG1@1G040100.1		Pp3c3_7980				13	scaffold-HRWG-2012192-Buxbaumia_aphylla	cluster_0866	ABK3
abk3g03294	BA02G05320	BA05G12480	Poh0048670	Poh0229190	Poh0213850		Hypnum@jg11929.t1		Entodon@jg11418.t1				CepurR40.1G042400	CepurR40.4G114400	CepurGG1@1G040300.1	CepurGG1@4G114400.1	Pp3c3_8080				12	scaffold-HRWG-2009745-Buxbaumia_aphylla	cluster_0867	ABK3
abk3g03295	BA02G05320	BA05G12480	Poh0048670	Poh0229190	Poh0213850		Hypnum@jg11929.t1		Entodon@jg11418.t1				CepurR40.1G042400	CepurR40.4G114400	CepurGG1@1G040300.1	CepurGG1@4G114400.1	Pp3c3_8080				12	scaffold-AWOI-2011834-Diphyscium_foliosum	cluster_0868	ABK3
abk3g03299	BA02G05320	BA05G12480	Poh0048670	Poh0229190	Poh0213850		Hypnum@jg11929.t1		Entodon@jg11418.t1				CepurR40.1G042400	CepurR40.4G114400	CepurGG1@1G040300.1	CepurGG1@4G114400.1	Pp3c3_8080				12	scaffold-HRWG-2009745-Buxbaumia_aphylla	cluster_0869	ABK3
abk3g03312	BA02G05090		Poh0048470	Poh0228960		Poh0124040	Hypnum@jg11938.t1		Entodon@jg11401.t1		Sc_g00695			CepurR40.4G112600		CepurGG1@4G112100.1	Pp3c3_8280				10	scaffold-AWOI-2070132-Diphyscium_foliosum	cluster_0870	ABK3
abk3g03316	BA02G05070	BA05G12390	Poh0048440	Poh0229000	Poh0214020	Poh0124000	Hypnum@jg11955.t1	Hypnum@jg23298.t1	Entodon@jg11375.t1	Entodon@jg4772.t1			CepurR40.1G055900	CepurR40.4G112100	CepurGG1@1G053300.1	CepurGG1@4G111500.1	Pp3c3_8350				15	scaffold-AWOI-2071483-Diphyscium_foliosum	cluster_0871	ABK3
abk3g03317	BA02G05070	BA05G12390	Poh0048440	Poh0229000	Poh0214020	Poh0124000	Hypnum@jg11955.t1	Hypnum@jg23298.t1	Entodon@jg11375.t1	Entodon@jg4772.t1			CepurR40.1G055900	CepurR40.4G112100	CepurGG1@1G053300.1	CepurGG1@4G111500.1	Pp3c3_8350				15	scaffold-AWOI-2071483-Diphyscium_foliosum	cluster_0872	ABK3
abk3g03319			Poh0048430	Poh0228990	Poh0214010	Poh0124010	Hypnum@jg11954.t1		Entodon@jg11375.t1	Entodon@jg4771.t1	Sc_g00677		CepurR40.1G055800	CepurR40.4G112400	CepurGG1@1G053200.1	CepurGG1@4G111800.1					12	scaffold-AWOI-2014843-Diphyscium_foliosum	cluster_0873	ABK3
abk3g03322	BA02G05070	BA05G12390	Poh0048440	Poh0229000	Poh0214020		Hypnum@jg11955.t1	Hypnum@jg23298.t1	Entodon@jg11375.t1	Entodon@jg4772.t1			CepurR40.1G055900	CepurR40.4G112100	CepurGG1@1G053300.1	CepurGG1@4G111500.1	Pp3c3_8350				14	scaffold-AWOI-2071483-Diphyscium_foliosum	cluster_0874	ABK3
abk3g03335	BA02G03360	BA05G13560	Poh0047670	Poh0214870			Hypnum@jg13077.t1	Hypnum@jg23697.t1	Entodon@jg10670.t1	Entodon@jg4453.t1	Sc_g00664		CepurR40.1G068300				Pp3c3_8470	Pp3c13_10930			12	scaffold-AWOI-2014874-Diphyscium_foliosum	cluster_0875	ABK3
abk3g03338	BA02G03420		Poh0047730	Poh0214810			Hypnum@jg13081.t1		Entodon@jg10674.t1			Sc_g00989	CepurR40.1G068500		CepurGG1@1G067100.1		Pp3c3_8490	Pp3c13_10900			10	scaffold-HRWG-2009350-Buxbaumia_aphylla	cluster_0876	ABK3
abk3g03339	BA02G03360	BA05G13560	Poh0047680	Poh0214860			Hypnum@jg13077.t1	Hypnum@jg23697.t1	Entodon@jg10670.t1	Entodon@jg4453.t1	Sc_g00664		CepurR40.1G068300		CepurGG1@1G066900.1		Pp3c3_8470	Pp3c13_10930			13	scaffold-AWOI-2014874-Diphyscium_foliosum	cluster_0877	ABK3
abk3g03345	BA02G03360	BA05G13560	Poh0047680	Poh0214860			Hypnum@jg13078.t1	Hypnum@jg23697.t1	Entodon@jg10671.t1	Entodon@jg4453.t1	Sc_g00664		CepurR40.1G068300		CepurGG1@1G066900.1		Pp3c3_8470	Pp3c13_10930			13	scaffold-AWOI-2014874-Diphyscium_foliosum	cluster_0878	ABK3
abk3g03347	BA02G03360	BA05G13560	Poh0047680	Poh0214860			Hypnum@jg13078.t1	Hypnum@jg23697.t1	Entodon@jg10671.t1	Entodon@jg4453.t1	Sc_g00664		CepurR40.1G068300		CepurGG1@1G066900.1		Pp3c3_8470	Pp3c13_10930			13	scaffold-AWOI-2014874-Diphyscium_foliosum	cluster_0879	ABK3
abk3g03348	BA02G03360	BA05G13560	Poh0047680	Poh0214860			Hypnum@jg13077.t1	Hypnum@jg23697.t1	Entodon@jg10670.t1	Entodon@jg4453.t1	Sc_g00664		CepurR40.1G068300		CepurGG1@1G066900.1		Pp3c3_8470	Pp3c13_10930			13	scaffold-AWOI-2014874-Diphyscium_foliosum	cluster_0880	ABK3
abk3g03349	BA02G03360	BA05G13560	Poh0047670	Poh0214860			Hypnum@jg13077.t1	Hypnum@jg23697.t1	Entodon@jg10670.t1	Entodon@jg4453.t1			CepurR40.1G068300		CepurGG1@1G066900.1		Pp3c3_8470	Pp3c13_10930			12	scaffold-AWOI-2014874-Diphyscium_foliosum	cluster_0881	ABK3
abk3g03351	BA02G03360	BA05G13560	Poh0047670	Poh0214870			Hypnum@jg13077.t1	Hypnum@jg23697.t1	Entodon@jg10670.t1	Entodon@jg4453.t1			CepurR40.1G068300		CepurGG1@1G066900.1		Pp3c3_8470	Pp3c13_10930			12	scaffold-AWOI-2014874-Diphyscium_foliosum	cluster_0882	ABK3
abk3g03352	BA02G03420		Poh0047730	Poh0214810			Hypnum@jg13081.t1		Entodon@jg10674.t1			Sc_g00989	CepurR40.1G068500		CepurGG1@1G067100.1		Pp3c3_8490	Pp3c13_10900			10	scaffold-HRWG-2009350-Buxbaumia_aphylla	cluster_0883	ABK3
abk3g03354	BA02G03420		Poh0047730	Poh0214810			Hypnum@jg13081.t1		Entodon@jg10674.t1			Sc_g00989	CepurR40.1G068500		CepurGG1@1G067100.1		Pp3c3_8490	Pp3c13_10900			10	scaffold-HRWG-2009350-Buxbaumia_aphylla	cluster_0884	ABK3
abk3g03374	BA02G03540		Poh0047110	Poh0215410			Hypnum@jg13109.t1		Entodon@jg10702.t1		Sc_g00928		CepurR40.1G070800		CepurGG1@1G069400.1		Pp3c3_8640	Pp3c13_10840			10	scaffold-HRWG-2069915-Buxbaumia_aphylla	cluster_0885	ABK3
abk3g03378	BA02G03490		Poh0047850	Poh0214680			Hypnum@jg13103.t1		Entodon@jg10697.t1			Sc_g00996	CepurR40.1G071400		CepurGG1@1G070000.1		Pp3c3_8830	Pp3c13_10830			10	scaffold-HRWG-2013987-Buxbaumia_aphylla	cluster_0886	ABK3
abk3g03386	BA02G03460		Poh0047820	Poh0214720			Hypnum@jg13096.t1		Entodon@jg10690.t1			Sc_g00994	CepurR40.1G070300		CepurGG1@1G068900.1		Pp3c3_8930	Pp3c13_10770			10	scaffold-HRWG-2008186-Buxbaumia_aphylla	cluster_0887	ABK3
abk3g03411	BA02G05220	BA05G16360	Poh0326780	Poh0128250	Poh0214150	Poh0048310		Hypnum@jg23872.t1	Entodon@jg11390.t1	Entodon@jg4272.t1	Sc_g05414		CepurR40.4G051900	CepurR40.1G056900	CepurGG1@4G049100.1	CepurGG1@1G054300.1			Pp3c26_14860	Pp3c4_27760	16	scaffold-HRWG-2017074-Buxbaumia_aphylla	cluster_0888	ABK3
abk3g03414	BA02G05040	BA05G16340	Poh0326790	Poh0128240	Poh0214160	Poh0048300	Hypnum@jg11965.t1		Entodon@jg11393.t1		Sc_g05415	Sc_g00441	CepurR40.4G051500	CepurR40.1G057000	CepurGG1@4G049000.1	CepurGG1@1G054400.1	Pp3c3_9410			Pp3c4_27780	16	scaffold-AWOI-2072209-Diphyscium_foliosum	cluster_0889	ABK3
abk3g03416	BA02G05190	BA05G16380	Poh0326770	Poh0128260	Poh0214140	Poh0048320	Hypnum@jg11962.t1	Hypnum@jg23877.t1		Entodon@jg4276.t1	Sc_g05413		CepurR40.4G052300	CepurR40.1G056800	CepurGG1@4G049400.1	CepurGG1@1G054200.1	Pp3c3_9390		Pp3c26_14890		16	scaffold-HRWG-2067355-Buxbaumia_aphylla	cluster_0890	ABK3
abk3g03418	BA02G05220	BA05G16360	Poh0326780	Poh0128250	Poh0214150	Poh0048310		Hypnum@jg23872.t1	Entodon@jg11390.t1	Entodon@jg4272.t1	Sc_g05414		CepurR40.4G051900	CepurR40.1G056900	CepurGG1@4G049100.1	CepurGG1@1G054300.1			Pp3c26_14860	Pp3c4_27760	16	scaffold-AWOI-2000404-Diphyscium_foliosum	cluster_0891	ABK3
abk3g03419	BA02G05220	BA05G16360	Poh0326780	Poh0128250	Poh0214150	Poh0048310		Hypnum@jg23872.t1	Entodon@jg11390.t1	Entodon@jg4272.t1	Sc_g05414		CepurR40.4G051900	CepurR40.1G056900	CepurGG1@4G049100.1	CepurGG1@1G054300.1			Pp3c26_14860	Pp3c4_27760	16	scaffold-HRWG-2017074-Buxbaumia_aphylla	cluster_0892	ABK3
abk3g03421	BA02G05190	BA05G16380	Poh0326770	Poh0128260	Poh0214140	Poh0048320	Hypnum@jg11962.t1	Hypnum@jg23877.t1		Entodon@jg4276.t1	Sc_g05413		CepurR40.4G052300	CepurR40.1G056800	CepurGG1@4G049400.1	CepurGG1@1G054200.1	Pp3c3_9390		Pp3c26_14890		16	scaffold-HRWG-2067355-Buxbaumia_aphylla	cluster_0893	ABK3
abk3g03422	BA02G05190	BA05G16380	Poh0326770	Poh0128260	Poh0214140	Poh0048320	Hypnum@jg11962.t1	Hypnum@jg23877.t1		Entodon@jg4276.t1	Sc_g05413		CepurR40.4G052300	CepurR40.1G056800	CepurGG1@4G049400.1	CepurGG1@1G054200.1	Pp3c3_9390		Pp3c26_14890		16	scaffold-HRWG-2067355-Buxbaumia_aphylla	cluster_0894	ABK3
abk3g03423	BA02G05190	BA05G16380	Poh0326770	Poh0128260	Poh0214140	Poh0048320	Hypnum@jg11962.t1	Hypnum@jg23877.t1		Entodon@jg4276.t1	Sc_g05413		CepurR40.4G052300	CepurR40.1G056800	CepurGG1@4G049400.1	CepurGG1@1G054200.1	Pp3c3_9390		Pp3c26_14890		16	scaffold-HRWG-2067355-Buxbaumia_aphylla	cluster_0895	ABK3
abk3g03424	BA02G05040	BA05G16340	Poh0326790	Poh0128240	Poh0214160	Poh0048300	Hypnum@jg11965.t1		Entodon@jg11393.t1		Sc_g05415	Sc_g00441	CepurR40.4G051500	CepurR40.1G057000	CepurGG1@4G049000.1	CepurGG1@1G054400.1	Pp3c3_9410			Pp3c4_27780	16	scaffold-AWOI-2072209-Diphyscium_foliosum	cluster_0896	ABK3
abk3g03425	BA02G05020	BA05G16320	Poh0326810	Poh0128220	Poh0214180	Poh0048290	Hypnum@jg11968.t1	Hypnum@jg23870.t1	Entodon@jg11396.t1	Entodon@jg4269.t1	Sc_g05417	Sc_g00443	CepurR40.4G050900	CepurR40.1G057300	CepurGG1@4G048700.1	CepurGG1@1G054800.1			Pp3c26_14760	Pp3c4_27860	18	scaffold-AWOI-2000265-Diphyscium_foliosum	cluster_0897	ABK3
abk3g03426	BA02G05020	BA05G16320	Poh0326810	Poh0128220	Poh0214180	Poh0048290	Hypnum@jg11968.t1	Hypnum@jg23870.t1	Entodon@jg11396.t1	Entodon@jg4269.t1	Sc_g05417	Sc_g00443	CepurR40.4G050900	CepurR40.1G057300	CepurGG1@4G048700.1	CepurGG1@1G054800.1			Pp3c26_14760	Pp3c4_27860	18	scaffold-AWOI-2000265-Diphyscium_foliosum	cluster_0898	ABK3
abk3g03428	BA02G05020	BA05G16320	Poh0326810	Poh0128220	Poh0214180	Poh0048290	Hypnum@jg11968.t1	Hypnum@jg23870.t1	Entodon@jg11396.t1	Entodon@jg4269.t1	Sc_g05417	Sc_g00443	CepurR40.4G050900	CepurR40.1G057300	CepurGG1@4G048700.1	CepurGG1@1G054800.1			Pp3c26_14760	Pp3c4_27860	18	scaffold-AWOI-2000265-Diphyscium_foliosum	cluster_0899	ABK3
abk3g03429	BA02G05020	BA05G16320	Poh0326810	Poh0128220	Poh0214180	Poh0048290	Hypnum@jg11968.t1	Hypnum@jg23870.t1	Entodon@jg11396.t1	Entodon@jg4269.t1	Sc_g05417	Sc_g00443	CepurR40.4G050900	CepurR40.1G057300	CepurGG1@4G048700.1	CepurGG1@1G054800.1			Pp3c26_14760	Pp3c4_27860	18	scaffold-HRWG-2015549-Buxbaumia_aphylla	cluster_0900	ABK3
abk3g03430		BA05G16330	Poh0326800	Poh0128230			Hypnum@jg11967.t1	Hypnum@jg23871.t1	Entodon@jg11394.t1	Entodon@jg4270.t1	Sc_g05416		CepurR40.4G051000	CepurR40.1G057100	CepurGG1@4G048800.1	CepurGG1@1G054500.1				Pp3c4_27790	13	scaffold-AWOI-2072579-Diphyscium_foliosum	cluster_0901	ABK3
abk3g03431		BA05G16330	Poh0326800	Poh0128230			Hypnum@jg11967.t1	Hypnum@jg23871.t1	Entodon@jg11394.t1	Entodon@jg4270.t1	Sc_g05416		CepurR40.4G051000	CepurR40.1G057100	CepurGG1@4G048800.1	CepurGG1@1G054500.1				Pp3c4_27790	13	scaffold-AWOI-2072579-Diphyscium_foliosum	cluster_0902	ABK3
abk3g03433		BA05G16330	Poh0326800	Poh0128230			Hypnum@jg11967.t1	Hypnum@jg23871.t1	Entodon@jg11394.t1	Entodon@jg4270.t1	Sc_g05416		CepurR40.4G051000	CepurR40.1G057100	CepurGG1@4G048800.1	CepurGG1@1G054500.1				Pp3c4_27790	13	scaffold-AWOI-2072579-Diphyscium_foliosum	cluster_0903	ABK3
abk3g03434		BA05G16330	Poh0326800	Poh0128230			Hypnum@jg11966.t1	Hypnum@jg23871.t1	Entodon@jg11394.t1	Entodon@jg4270.t1	Sc_g05416		CepurR40.4G051000	CepurR40.1G057100	CepurGG1@4G048800.1	CepurGG1@1G054500.1				Pp3c4_27790	13	scaffold-AWOI-2072579-Diphyscium_foliosum	cluster_0904	ABK3
abk3g03435	BA02G05040	BA05G16340	Poh0326790	Poh0128240	Poh0214160		Hypnum@jg11965.t1		Entodon@jg11393.t1		Sc_g05415	Sc_g00441	CepurR40.4G051500	CepurR40.1G057000	CepurGG1@4G049000.1	CepurGG1@1G054400.1	Pp3c3_9410			Pp3c4_27780	15	scaffold-AWOI-2072209-Diphyscium_foliosum	cluster_0905	ABK3
abk3g03436	BA02G05040	BA05G16340	Poh0326790	Poh0128240	Poh0214160		Hypnum@jg11965.t1		Entodon@jg11393.t1		Sc_g05415	Sc_g00441	CepurR40.4G051500	CepurR40.1G057000	CepurGG1@4G049000.1	CepurGG1@1G054400.1	Pp3c3_9410			Pp3c4_27780	15	scaffold-AWOI-2072209-Diphyscium_foliosum	cluster_0906	ABK3
abk3g03437	BA02G05040	BA05G16340	Poh0326790	Poh0128240	Poh0214160		Hypnum@jg11965.t1		Entodon@jg11393.t1		Sc_g05415	Sc_g00441	CepurR40.4G051500	CepurR40.1G057000	CepurGG1@4G049000.1	CepurGG1@1G054400.1	Pp3c3_9410			Pp3c4_27780	15	scaffold-AWOI-2072209-Diphyscium_foliosum	cluster_0907	ABK3
abk3g03438	BA02G05040	BA05G16340	Poh0326790	Poh0128240	Poh0214160		Hypnum@jg11965.t1		Entodon@jg11393.t1		Sc_g05415	Sc_g00441	CepurR40.4G051500	CepurR40.1G057000	CepurGG1@4G049000.1	CepurGG1@1G054400.1	Pp3c3_9410			Pp3c4_27780	15	scaffold-AWOI-2072209-Diphyscium_foliosum	cluster_0908	ABK3
abk3g03439					Poh0214190		Hypnum@jg11969.t1		Entodon@jg11397.t1		Sc_g05418	Sc_g00444	CepurR40.4G050800	CepurR40.1G057400	CepurGG1@4G048600.1	CepurGG1@1G054900.1	Pp3c3_9430		Pp3c26_14710	Pp3c4_27870	12	scaffold-AWOI-2072654-Diphyscium_foliosum	cluster_0909	ABK3
abk3g03440		BA05G16310	Poh0326820	Poh0128210				Hypnum@jg23868.t1		Entodon@jg4267.t1	Sc_g05419		CepurR40.4G050700	CepurR40.1G057600	CepurGG1@4G048500.1	CepurGG1@1G055100.1			Pp3c26_14690	Pp3c4_27930	12	scaffold-AWOI-2005770-Diphyscium_foliosum	cluster_0910	ABK3
abk3g03441		BA05G16310	Poh0326820	Poh0128210				Hypnum@jg23868.t1		Entodon@jg4267.t1	Sc_g05419		CepurR40.4G050700	CepurR40.1G057600	CepurGG1@4G048500.1	CepurGG1@1G055100.1			Pp3c26_14690	Pp3c4_27930	12	scaffold-AWOI-2005770-Diphyscium_foliosum	cluster_0911	ABK3
abk3g03445					Poh0214190		Hypnum@jg11969.t1		Entodon@jg11397.t1		Sc_g05418	Sc_g00444	CepurR40.4G050800	CepurR40.1G057400	CepurGG1@4G048600.1	CepurGG1@1G054900.1	Pp3c3_9430		Pp3c26_14710	Pp3c4_27870	12	scaffold-AWOI-2072654-Diphyscium_foliosum	cluster_0912	ABK3
abk3g03446					Poh0214190		Hypnum@jg11969.t1		Entodon@jg11397.t1		Sc_g05418	Sc_g00444	CepurR40.4G050800	CepurR40.1G057400	CepurGG1@4G048600.1	CepurGG1@1G054900.1	Pp3c3_9430		Pp3c26_14710	Pp3c4_27870	12	scaffold-AWOI-2072654-Diphyscium_foliosum	cluster_0913	ABK3
abk3g03447	BA02G04990	BA05G16300	Poh0326830	Poh0128200				Hypnum@jg23867.t1		Entodon@jg4266.t1				CepurR40.1G057700		CepurGG1@1G055200.1	Pp3c3_9440			Pp3c4_27940	10	scaffold-AWOI-2012300-Diphyscium_foliosum	cluster_0914	ABK3
abk3g03448	BA02G04950		Poh0047950	Poh0214560			Hypnum@jg11975.t1		Entodon@jg11369.t1			Sc_g00448		CepurR40.1G058200		CepurGG1@1G056600.1	Pp3c3_9470	Pp3c13_11650	Pp3c26_14640		11	scaffold-HRWG-2011220-Buxbaumia_aphylla	cluster_0915	ABK3
abk3g03450	BA02G04820	BA05G16270	Poh0326850	Poh0128180			Hypnum@jg11980.t1		Entodon@jg11367.t1					CepurR40.1G058600		CepurGG1@1G056900.1	Pp3c3_9610	Pp3c13_11710			10	#N/A	cluster_0916	ABK3
abk3g03455	BA02G04880		Poh0047990	Poh0214510			Hypnum@jg11986.t1		Entodon@jg11361.t1		Sc_g00985		CepurR40.1G054700		CepurGG1@1G052000.1		Pp3c3_9680	Pp3c13_11820	Pp3c26_14600	Pp3c4_28050	12	scaffold-AWOI-2072215-Diphyscium_foliosum	cluster_0917	ABK3
abk3g03456	BA02G04880		Poh0047990	Poh0214510			Hypnum@jg11986.t1		Entodon@jg11361.t1		Sc_g00985		CepurR40.1G054700		CepurGG1@1G052000.1		Pp3c3_9680	Pp3c13_11820	Pp3c26_14600	Pp3c4_28050	12	scaffold-AWOI-2072215-Diphyscium_foliosum	cluster_0918	ABK3
abk3g03457	BA02G04880		Poh0047990	Poh0214510			Hypnum@jg11986.t1		Entodon@jg11361.t1		Sc_g00985		CepurR40.1G054700		CepurGG1@1G052000.1		Pp3c3_9680	Pp3c13_11820	Pp3c26_14600	Pp3c4_28050	12	scaffold-AWOI-2072215-Diphyscium_foliosum	cluster_0919	ABK3
abk3g03458	BA02G04860		Poh0047980	Poh0214520			Hypnum@jg11983.t1		Entodon@jg11364.t1					CepurR40.1G058900		CepurGG1@1G057200.1	Pp3c3_9650	Pp3c13_11750	Pp3c26_14620		10	scaffold-AWOI-2011831-Diphyscium_foliosum	cluster_0920	ABK3
abk3g03461	BA02G04860		Poh0047980	Poh0214520			Hypnum@jg11983.t1		Entodon@jg11364.t1					CepurR40.1G058900		CepurGG1@1G057200.1	Pp3c3_9650	Pp3c13_11750	Pp3c26_14620		10	scaffold-AWOI-2011831-Diphyscium_foliosum	cluster_0921	ABK3
abk3g03462	BA02G04860		Poh0047980	Poh0214520			Hypnum@jg11983.t1		Entodon@jg11364.t1					CepurR40.1G058900		CepurGG1@1G057200.1	Pp3c3_9650	Pp3c13_11750	Pp3c26_14620		10	scaffold-AWOI-2011831-Diphyscium_foliosum	cluster_0922	ABK3
abk3g03463	BA02G04860		Poh0047980	Poh0214520			Hypnum@jg11983.t1		Entodon@jg11364.t1					CepurR40.1G058900		CepurGG1@1G057200.1	Pp3c3_9650	Pp3c13_11750	Pp3c26_14620		10	scaffold-AWOI-2011831-Diphyscium_foliosum	cluster_0923	ABK3
abk3g03464	BA02G04880		Poh0047990	Poh0214510			Hypnum@jg11986.t1		Entodon@jg11361.t1		Sc_g00985		CepurR40.1G054700		CepurGG1@1G052000.1		Pp3c3_9680	Pp3c13_11820	Pp3c26_14600	Pp3c4_28050	12	scaffold-AWOI-2072215-Diphyscium_foliosum	cluster_0924	ABK3
abk3g03466	BA02G04920		Poh0048030	Poh0214400			Hypnum@jg11993.t1		Entodon@jg11357.t1		Sc_g00978		CepurR40.1G054200		CepurGG1@1G051600.1		Pp3c3_9740		Pp3c26_14540		10	scaffold-AWOI-2072196-Diphyscium_foliosum	cluster_0925	ABK3
abk3g03467	BA02G04920		Poh0048030	Poh0214400			Hypnum@jg11993.t1		Entodon@jg11357.t1		Sc_g00978		CepurR40.1G054200		CepurGG1@1G051600.1		Pp3c3_9740		Pp3c26_14540		10	scaffold-AWOI-2072196-Diphyscium_foliosum	cluster_0926	ABK3
abk3g03468	BA02G04920		Poh0048030	Poh0214400			Hypnum@jg11993.t1		Entodon@jg11357.t1		Sc_g00978		CepurR40.1G054200		CepurGG1@1G051600.1		Pp3c3_9740		Pp3c26_14540		10	scaffold-AWOI-2072196-Diphyscium_foliosum	cluster_0927	ABK3
abk3g03469	BA02G04910		Poh0048020	Poh0214410			Hypnum@jg11992.t1		Entodon@jg11358.t1		Sc_g00979		CepurR40.1G054300		CepurGG1@1G051700.1		Pp3c3_9730	Pp3c13_11910			10	scaffold-AWOI-2073052-Diphyscium_foliosum	cluster_0928	ABK3
abk3g03471	BA02G04910		Poh0048020	Poh0214410			Hypnum@jg11992.t1		Entodon@jg11358.t1		Sc_g00979		CepurR40.1G054300		CepurGG1@1G051700.1		Pp3c3_9730	Pp3c13_11910			10	scaffold-AWOI-2073052-Diphyscium_foliosum	cluster_0929	ABK3
abk3g03472			Poh0048050	Poh0214380			Hypnum@jg11995.t1		Entodon@jg11355.t1		Sc_g00977		CepurR40.1G054100		CepurGG1@1G051500.1		Pp3c3_9750	Pp3c13_11920	Pp3c26_14520		10	scaffold-AWOI-2073214-Diphyscium_foliosum	cluster_0930	ABK3
abk3g03473			Poh0048050	Poh0214380			Hypnum@jg11995.t1		Entodon@jg11355.t1		Sc_g00977		CepurR40.1G054100		CepurGG1@1G051500.1		Pp3c3_9750	Pp3c13_11920	Pp3c26_14520		10	scaffold-AWOI-2073214-Diphyscium_foliosum	cluster_0931	ABK3
abk3g03474	BA02G04910		Poh0048020	Poh0214410			Hypnum@jg11992.t1		Entodon@jg11358.t1		Sc_g00979		CepurR40.1G054300		CepurGG1@1G051700.1		Pp3c3_9730	Pp3c13_11910			10	scaffold-AWOI-2073052-Diphyscium_foliosum	cluster_0932	ABK3
abk3g03475	BA02G04810		Poh0048050	Poh0214380			Hypnum@jg11995.t1		Entodon@jg11355.t1		Sc_g00977		CepurR40.1G054100		CepurGG1@1G051500.1		Pp3c3_9750	Pp3c13_11920	Pp3c26_14520		11	scaffold-AWOI-2073214-Diphyscium_foliosum	cluster_0933	ABK3
abk3g03476	BA02G04810		Poh0048050	Poh0214380			Hypnum@jg11995.t1		Entodon@jg11355.t1		Sc_g00977		CepurR40.1G054100		CepurGG1@1G051500.1		Pp3c3_9750	Pp3c13_11920	Pp3c26_14520		11	scaffold-AWOI-2073214-Diphyscium_foliosum	cluster_0934	ABK3
abk3g03477	BA02G04910		Poh0048020	Poh0214410			Hypnum@jg11992.t1		Entodon@jg11358.t1		Sc_g00979		CepurR40.1G054300		CepurGG1@1G051700.1		Pp3c3_9730	Pp3c13_11910			10	scaffold-AWOI-2013184-Diphyscium_foliosum	cluster_0935	ABK3
abk3g03478	BA02G04920		Poh0048030	Poh0214400			Hypnum@jg11993.t1		Entodon@jg11357.t1		Sc_g00978		CepurR40.1G054200		CepurGG1@1G051600.1		Pp3c3_9740		Pp3c26_14540		10	scaffold-AWOI-2072196-Diphyscium_foliosum	cluster_0936	ABK3
abk3g03483	BA02G04810		Poh0048050	Poh0214380			Hypnum@jg11995.t1		Entodon@jg11355.t1		Sc_g00977		CepurR40.1G054100		CepurGG1@1G051500.1		Pp3c3_9750	Pp3c13_11924	Pp3c26_14520		11	scaffold-AWOI-2073214-Diphyscium_foliosum	cluster_0937	ABK3
abk3g03488	BA02G04930		Poh0048100	Poh0214340			Hypnum@jg12004.t1		Entodon@jg11348.t1		Sc_g00558		CepurR40.1G053300		CepurGG1@1G050600.1		Pp3c3_9790	Pp3c13_12020			10	scaffold-AWOI-2069419-Diphyscium_foliosum	cluster_0938	ABK3
abk3g03489	BA02G04930		Poh0048100	Poh0214340			Hypnum@jg12004.t1		Entodon@jg11348.t1		Sc_g00558		CepurR40.1G053300		CepurGG1@1G050600.1		Pp3c3_9790	Pp3c13_12020			10	scaffold-AWOI-2069419-Diphyscium_foliosum	cluster_0939	ABK3
abk3g03496	BA02G04930		Poh0048100	Poh0214340			Hypnum@jg12004.t1		Entodon@jg11348.t1		Sc_g00558		CepurR40.1G053300		CepurGG1@1G050600.1		Pp3c3_9790	Pp3c13_12020			10	scaffold-HRWG-2006216-Buxbaumia_aphylla	cluster_0940	ABK3
abk3g03536	BA02G02740		Poh0047890	Poh0214640			Hypnum@jg12030.t1		Entodon@jg11320.t1		Sc_g00589		CepurR40.1G047800		CepurGG1@1G045200.1		Pp3c3_9950	Pp3c13_11550			10	scaffold-AWOI-2014346-Diphyscium_foliosum	cluster_0941	ABK3
abk3g03537	BA02G02740		Poh0047890	Poh0214640			Hypnum@jg12030.t1		Entodon@jg11320.t1		Sc_g00589		CepurR40.1G047800		CepurGG1@1G045200.1		Pp3c3_9950	Pp3c13_11550			10	scaffold-AWOI-2014346-Diphyscium_foliosum	cluster_0942	ABK3
abk3g03538	BA02G02740		Poh0047890	Poh0214640			Hypnum@jg12030.t1		Entodon@jg11320.t1		Sc_g00589		CepurR40.1G047800		CepurGG1@1G045200.1		Pp3c3_9950	Pp3c13_11550			10	scaffold-AWOI-2014346-Diphyscium_foliosum	cluster_0943	ABK3
abk3g03539	BA02G03080		Poh0047900	Poh0214630			Hypnum@jg12028.t1		Entodon@jg11322.t1		Sc_g00601		CepurR40.1G048000		CepurGG1@1G045400.1		Pp3c3_9940	Pp3c13_11570			10	scaffold-HRWG-2070587-Buxbaumia_aphylla	cluster_0944	ABK3
abk3g03544	BA02G03080		Poh0047900	Poh0214630			Hypnum@jg12028.t1		Entodon@jg11322.t1		Sc_g00601		CepurR40.1G048000		CepurGG1@1G045400.1		Pp3c3_9940	Pp3c13_11570			10	scaffold-AWOI-2013196-Diphyscium_foliosum	cluster_0945	ABK3
abk3g03545	BA02G03080		Poh0047900	Poh0214630			Hypnum@jg12028.t1		Entodon@jg11322.t1		Sc_g00601		CepurR40.1G048000		CepurGG1@1G045400.1		Pp3c3_9940	Pp3c13_11570			10	scaffold-HRWG-2070587-Buxbaumia_aphylla	cluster_0946	ABK3
abk3g03546	BA02G02740		Poh0047890	Poh0214640			Hypnum@jg12030.t1	Hypnum@jg23739.t1	Entodon@jg11320.t1	Entodon@jg4421.t1	Sc_g00589		CepurR40.1G047800		CepurGG1@1G045200.1		Pp3c3_9950	Pp3c13_11550			12	scaffold-AWOI-2014346-Diphyscium_foliosum	cluster_0947	ABK3
abk3g03547	BA02G02710		Poh0047870	Poh0214660			Hypnum@jg12030.t1	Hypnum@jg23739.t1	Entodon@jg11320.t1	Entodon@jg4421.t1	Sc_g00591		CepurR40.1G047600		CepurGG1@1G045000.1		Pp3c3_9970	Pp3c13_11550			12	scaffold-AWOI-2010050-Diphyscium_foliosum	cluster_0948	ABK3
abk3g03548	BA02G02710		Poh0047870	Poh0214660			Hypnum@jg12030.t1	Hypnum@jg23739.t1	Entodon@jg11320.t1	Entodon@jg4421.t1	Sc_g00591		CepurR40.1G047600		CepurGG1@1G045000.1		Pp3c3_9970	Pp3c13_11550			12	scaffold-AWOI-2010050-Diphyscium_foliosum	cluster_0949	ABK3
abk3g03549	BA02G02740		Poh0047890	Poh0214640			Hypnum@jg12030.t1	Hypnum@jg23739.t1	Entodon@jg11320.t1	Entodon@jg4421.t1	Sc_g00589		CepurR40.1G047800		CepurGG1@1G045200.1		Pp3c3_9950	Pp3c13_11550			12	scaffold-AWOI-2014346-Diphyscium_foliosum	cluster_0950	ABK3
abk3g03550	BA02G02740		Poh0047890	Poh0214640			Hypnum@jg12030.t1	Hypnum@jg23739.t1	Entodon@jg11320.t1	Entodon@jg4421.t1	Sc_g00589		CepurR40.1G047800		CepurGG1@1G045200.1		Pp3c3_9950	Pp3c13_11550			12	scaffold-AWOI-2014346-Diphyscium_foliosum	cluster_0951	ABK3
abk3g03554	BA02G02710		Poh0047870	Poh0214660			Hypnum@jg12030.t1	Hypnum@jg23739.t1	Entodon@jg11320.t1	Entodon@jg4421.t1	Sc_g00591		CepurR40.1G047600		CepurGG1@1G045000.1		Pp3c3_9970	Pp3c13_11550			12	scaffold-AWOI-2010050-Diphyscium_foliosum	cluster_0952	ABK3
abk3g00005	BA02G02670	BA05G13900	Poh0047190	Poh0215350	Poh0231810	Poh0126360	Hypnum@jg12980.t1	Hypnum@jg23752.t1	Entodon@jg10600.t1	Entodon@jg4414.t1	Sc_g00584		CepurR40.1G046900		CepurGG1@1G044200.1		Pp3c3_10020				14	#N/A	cluster_0953	ABK3
abk3g00004	BA02G02670		Poh0047190	Poh0215350		Poh0126360	Hypnum@jg12980.t1	Hypnum@jg23752.t1	Entodon@jg10600.t1	Entodon@jg4414.t1	Sc_g00584		CepurR40.1G046900		CepurGG1@1G044200.1		Pp3c3_10010				12	#N/A	cluster_0954	ABK3
abk3g00009		BA05G14170			Poh0231980	Poh0126500		Hypnum@jg23778.t1		Entodon@jg4385.t1	Sc_g00596		CepurR40.1G045300		CepurGG1@1G042900.1		Pp3c3_10060	Pp3c13_11470			10	scaffold-HRWG-2070226-Buxbaumia_aphylla	cluster_0955	ABK3
abk3g00011		BA05G14170			Poh0231980	Poh0126500		Hypnum@jg23778.t1		Entodon@jg4385.t1	Sc_g00596		CepurR40.1G045300		CepurGG1@1G042900.1		Pp3c3_10060	Pp3c13_11470			10	scaffold-AWOI-2013498-Diphyscium_foliosum	cluster_0956	ABK3
abk3g00017		BA05G14060	Poh0047250	Poh0215280	Poh0232050	Poh0126570	Hypnum@jg13000.t1		Entodon@jg10615.t1		Sc_g00603		CepurR40.1G044500		CepurGG1@1G042100.1		Pp3c3_10180	Pp3c13_11410			12	scaffold-AWOI-2005423-Diphyscium_foliosum	cluster_0957	ABK3
abk3g00018		BA05G14060	Poh0047250	Poh0215280	Poh0232050	Poh0126570	Hypnum@jg13000.t1		Entodon@jg10615.t1		Sc_g00603		CepurR40.1G044500		CepurGG1@1G042100.1		Pp3c3_10180	Pp3c13_11410			12	scaffold-AWOI-2005423-Diphyscium_foliosum	cluster_0958	ABK3
abk3g00025		BA05G14060	Poh0047250	Poh0215280	Poh0232050	Poh0126570	Hypnum@jg13000.t1		Entodon@jg10615.t1		Sc_g00603		CepurR40.1G044500		CepurGG1@1G042100.1		Pp3c3_10180	Pp3c13_11410			12	scaffold-AWOI-2005423-Diphyscium_foliosum	cluster_0959	ABK3
abk3g00028	BA02G02880		Poh0047280	Poh0215260	Poh0231940		Hypnum@jg13003.t1	Hypnum@jg23764.t1	Entodon@jg10618.t1	Entodon@jg4402.t1	Sc_g00610		CepurR40.1G059200		CepurGG1@1G057500.1		Pp3c3_10220	Pp3c13_11270			13	scaffold-AWOI-2072228-Diphyscium_foliosum	cluster_0960	ABK3
abk3g00032	BA02G02790		Poh0047360		Poh0231880		Hypnum@jg13018.t1	Hypnum@jg23758.t1	Entodon@jg10626.t1	Entodon@jg4407.t1	Sc_g00617		CepurR40.1G060200		CepurGG1@1G058900.1		Pp3c3_10260				11	scaffold-AWOI-2004463-Diphyscium_foliosum	cluster_0961	ABK3
abk3g00033	BA02G02820		Poh0047330	Poh0215220			Hypnum@jg13011.t1		Entodon@jg10623.t1		Sc_g00614		CepurR40.1G059900		CepurGG1@1G058400.1		Pp3c3_10250	Pp3c13_11160			10	scaffold-AWOI-2010641-Diphyscium_foliosum	cluster_0962	ABK3
abk3g00038	BA02G02820		Poh0047330	Poh0215220			Hypnum@jg13011.t1		Entodon@jg10623.t1		Sc_g00614		CepurR40.1G059900		CepurGG1@1G058400.1		Pp3c3_10250	Pp3c13_11160			10	scaffold-AWOI-2010641-Diphyscium_foliosum	cluster_0963	ABK3
abk3g00039	BA02G02820		Poh0047330	Poh0215220			Hypnum@jg13011.t1		Entodon@jg10623.t1		Sc_g00614		CepurR40.1G059900		CepurGG1@1G058400.1		Pp3c3_10250	Pp3c13_11160			10	scaffold-AWOI-2010641-Diphyscium_foliosum	cluster_0964	ABK3
abk3g00040	BA02G02790		Poh0047360		Poh0231880		Hypnum@jg13018.t1	Hypnum@jg23758.t1	Entodon@jg10626.t1	Entodon@jg4407.t1	Sc_g00617		CepurR40.1G060200		CepurGG1@1G058900.1		Pp3c3_10260				11	scaffold-AWOI-2004463-Diphyscium_foliosum	cluster_0965	ABK3
abk3g00127	BA02G06010		Poh0049430	Poh0212990			Hypnum@jg13233.t1		Entodon@jg10819.t1		Sc_g01314		CepurR40.1G152800		CepurGG1@1G149800.1		Pp3c3_11040	Pp3c13_8920			10	scaffold-AWOI-2013174-Diphyscium_foliosum	cluster_0966	ABK3
abk3g00132	BA02G06010		Poh0049430	Poh0212990			Hypnum@jg13233.t1		Entodon@jg10819.t1		Sc_g01314		CepurR40.1G152800		CepurGG1@1G149800.1		Pp3c3_11040	Pp3c13_8920			10	scaffold-AWOI-2013174-Diphyscium_foliosum	cluster_0967	ABK3
abk3g00133	BA02G06010		Poh0049430	Poh0212990			Hypnum@jg13233.t1		Entodon@jg10819.t1		Sc_g01314		CepurR40.1G152800		CepurGG1@1G149800.1		Pp3c3_11040	Pp3c13_8920			10	scaffold-AWOI-2013174-Diphyscium_foliosum	cluster_0968	ABK3
abk3g00179	BA02G05780		Poh0049210	Poh0213230			Hypnum@jg13183.t1		Entodon@jg10770.t1		Sc_g00959		CepurR40.1G112700	CepurR40.4G089200	CepurGG1@1G101700.1	CepurGG1@4G090100.1		Pp3c13_12520			11	scaffold-AWOI-2011229-Diphyscium_foliosum	cluster_0969	ABK3
abk3g00189	BA02G05760		Poh0049180	Poh0213260			Hypnum@jg13178.t1		Entodon@jg10766.t1				CepurR40.1G112900	CepurR40.4G088500	CepurGG1@1G101900.1	CepurGG1@4G089400.1	Pp3c3_11230	Pp3c13_12420			11	scaffold-AWOI-2069432-Diphyscium_foliosum	cluster_0970	ABK3
abk3g00190	BA02G05760		Poh0049180	Poh0213260			Hypnum@jg13178.t1		Entodon@jg10766.t1				CepurR40.1G112900	CepurR40.4G088500	CepurGG1@1G101900.1	CepurGG1@4G089400.1	Pp3c3_11230	Pp3c13_12420			11	scaffold-AWOI-2069432-Diphyscium_foliosum	cluster_0971	ABK3
abk3g00191	BA02G05760		Poh0049180	Poh0213260			Hypnum@jg13178.t1		Entodon@jg10766.t1				CepurR40.1G112900	CepurR40.4G088500	CepurGG1@1G101900.1	CepurGG1@4G089400.1	Pp3c3_11230	Pp3c13_12420			11	scaffold-AWOI-2069432-Diphyscium_foliosum	cluster_0972	ABK3
abk3g00192	BA02G05760		Poh0049180	Poh0213260			Hypnum@jg13178.t1		Entodon@jg10766.t1				CepurR40.1G112900	CepurR40.4G088500	CepurGG1@1G101900.1	CepurGG1@4G089400.1	Pp3c3_11230	Pp3c13_12420			11	scaffold-AWOI-2069432-Diphyscium_foliosum	cluster_0973	ABK3
abk3g00194	BA02G05760		Poh0049180	Poh0213260			Hypnum@jg13178.t1		Entodon@jg10766.t1				CepurR40.1G112900	CepurR40.4G088500	CepurGG1@1G101900.1	CepurGG1@4G089400.1	Pp3c3_11230	Pp3c13_12420			11	scaffold-AWOI-2069432-Diphyscium_foliosum	cluster_0974	ABK3
abk3g00197	BA02G05760		Poh0049180	Poh0213260			Hypnum@jg13178.t1		Entodon@jg10766.t1				CepurR40.1G112900	CepurR40.4G088500	CepurGG1@1G101900.1	CepurGG1@4G089400.1	Pp3c3_11230	Pp3c13_12420			11	scaffold-AWOI-2069432-Diphyscium_foliosum	cluster_0975	ABK3
abk3g00201			Poh0049140	Poh0213300			Hypnum@jg13168.t1		Entodon@jg10760.t1				CepurR40.1G113600	CepurR40.4G087300	CepurGG1@1G102400.1	CepurGG1@4G087900.1	Pp3c3_11250	Pp3c13_12320			10	scaffold-AWOI-2002698-Diphyscium_foliosum	cluster_0976	ABK3
abk3g00202			Poh0049140	Poh0213300			Hypnum@jg13168.t1		Entodon@jg10760.t1				CepurR40.1G113600	CepurR40.4G087300	CepurGG1@1G102400.1	CepurGG1@4G087900.1	Pp3c3_11250	Pp3c13_12320			10	scaffold-AWOI-2002698-Diphyscium_foliosum	cluster_0977	ABK3
abk3g00203			Poh0049140	Poh0213300			Hypnum@jg13168.t1		Entodon@jg10760.t1				CepurR40.1G113600	CepurR40.4G087300	CepurGG1@1G102400.1	CepurGG1@4G087900.1	Pp3c3_11250	Pp3c13_12320			10	scaffold-AWOI-2010076-Diphyscium_foliosum	cluster_0978	ABK3
abk3g00210	BA02G05630		Poh0048960	Poh0213500			Hypnum@jg13156.t1		Entodon@jg10746.t1		Sc_g00822	Sc_g05121		CepurR40.4G084000	CepurGG1@1G105800.1	CepurGG1@4G085000.1		Pp3c13_8530			11	scaffold-HRWG-2014368-Buxbaumia_aphylla	cluster_0979	ABK3
abk3g00211	BA02G05630		Poh0048960	Poh0213500			Hypnum@jg13156.t1		Entodon@jg10746.t1		Sc_g00822	Sc_g05121		CepurR40.4G084000	CepurGG1@1G105800.1	CepurGG1@4G085000.1		Pp3c13_8530			11	scaffold-HRWG-2014368-Buxbaumia_aphylla	cluster_0980	ABK3
abk3g00212			Poh0048970	Poh0213510			Hypnum@jg13155.t1		Entodon@jg10745.t1		Sc_g00821	Sc_g05120		CepurR40.4G083900	CepurGG1@1G105600.1	CepurGG1@4G084900.1		Pp3c13_8580			10	#N/A	cluster_0981	ABK3
abk3g00215	BA02G05610		Poh0048980	Poh0213520			Hypnum@jg13152.t1		Entodon@jg10743.t1		Sc_g00818	Sc_g05117		CepurR40.4G083700	CepurGG1@1G105300.1	CepurGG1@4G084700.1	Pp3c3_11340	Pp3c13_8600			12	scaffold-HRWG-2016325-Buxbaumia_aphylla	cluster_0982	ABK3
abk3g00216	BA02G05610		Poh0048980	Poh0213520			Hypnum@jg13152.t1		Entodon@jg10743.t1		Sc_g00818	Sc_g05117		CepurR40.4G083700	CepurGG1@1G105300.1	CepurGG1@4G084700.1	Pp3c3_11340	Pp3c13_8600			12	scaffold-HRWG-2016325-Buxbaumia_aphylla	cluster_0983	ABK3
abk3g00218	BA02G05610		Poh0048980	Poh0213520			Hypnum@jg13152.t1		Entodon@jg10743.t1		Sc_g00818	Sc_g05117		CepurR40.4G083700	CepurGG1@1G105300.1	CepurGG1@4G084700.1	Pp3c3_11340	Pp3c13_8600			12	scaffold-AWOI-2002121-Diphyscium_foliosum	cluster_0984	ABK3
abk3g00224	BA02G05570		Poh0048930	Poh0213570			Hypnum@jg13140.t1		Entodon@jg10731.t1		Sc_g00814		CepurR40.1G116100	CepurR40.4G082700	CepurGG1@1G104900.1	CepurGG1@4G083600.1		Pp3c13_8730			11	#N/A	cluster_0985	ABK3
abk3g00228	BA02G05570		Poh0048930	Poh0213570			Hypnum@jg13140.t1		Entodon@jg10731.t1		Sc_g00814		CepurR40.1G116100	CepurR40.4G082700	CepurGG1@1G104900.1	CepurGG1@4G083600.1		Pp3c13_8730			11	#N/A	cluster_0986	ABK3
abk3g00229	BA02G05570		Poh0048930	Poh0213570			Hypnum@jg13140.t1		Entodon@jg10731.t1		Sc_g00814		CepurR40.1G116100	CepurR40.4G082700	CepurGG1@1G104900.1	CepurGG1@4G083600.1		Pp3c13_8730			11	#N/A	cluster_0987	ABK3
abk3g00233	BA02G05560		Poh0048940	Poh0213580			Hypnum@jg13142.t1		Entodon@jg10732.t1		Sc_g00814		CepurR40.1G116200		CepurGG1@1G105000.1		Pp3c3_11450	Pp3c13_8720			10	scaffold-AWOI-2071970-Diphyscium_foliosum	cluster_0988	ABK3
abk3g00239	BA02G05540		Poh0048900	Poh0213600			Hypnum@jg13137.t1		Entodon@jg10723.t1		Sc_g00812		CepurR40.1G115900		CepurGG1@1G104700.1		Pp3c3_11610	Pp3c13_8740			10	scaffold-AWOI-2071196-Diphyscium_foliosum	cluster_0989	ABK3
abk3g00244	BA02G05520	BA05G12900	Poh0048860				Hypnum@jg13136.t1		Entodon@jg10722.t1		Sc_g05230		CepurR40.1G115300	CepurR40.4G082000	CepurGG1@1G104100.1	CepurGG1@4G082900.1					10	scaffold-HRWG-2067343-Buxbaumia_aphylla	cluster_0990	ABK3
abk3g00246	BA02G05520	BA05G12900	Poh0048860				Hypnum@jg13136.t1		Entodon@jg10722.t1		Sc_g05230		CepurR40.1G115300	CepurR40.4G082000	CepurGG1@1G104100.1	CepurGG1@4G082900.1					10	scaffold-HRWG-2067343-Buxbaumia_aphylla	cluster_0991	ABK3
abk3g00281	BA02G12970			Poh0335190						Entodon@jg12226.t1	Sc_g04629		CepurR40.4G170700	CepurR40.1G247400	CepurGG1@4G172300.1	CepurGG1@1G241900.1	Pp3c3_11990	Pp3c13_21610			10	scaffold-AWOI-2072113-Diphyscium_foliosum	cluster_0992	ABK3
abk3g00284			Poh0317500		Poh0052580	Poh0085310					Sc_g04627		CepurR40.4G170900	CepurR40.1G226800	CepurGG1@4G172500.1	CepurGG1@1G194300.1	Pp3c3_12010	Pp3c13_21630			10	scaffold-AWOI-2072118-Diphyscium_foliosum	cluster_0993	ABK3
abk3g00288	BA02G12880		Poh0317560		Poh0052620	Poh0085360	Hypnum@jg11801.t1		Entodon@jg11541.t1		Sc_g04628		CepurR40.4G171000	CepurR40.1G227300	CepurGG1@4G172600.1	CepurGG1@1G193800.1	Pp3c3_12080				12	scaffold-HRWG-2070680-Buxbaumia_aphylla	cluster_0994	ABK3
abk3g00289	BA02G12880		Poh0317560		Poh0052620	Poh0085360	Hypnum@jg11801.t1		Entodon@jg11541.t1		Sc_g04628		CepurR40.4G171000	CepurR40.1G227300	CepurGG1@4G172600.1	CepurGG1@1G193800.1	Pp3c3_12080				12	scaffold-HRWG-2070680-Buxbaumia_aphylla	cluster_0995	ABK3
abk3g00290	BA02G12870		Poh0317540		Poh0052630	Poh0085370	Hypnum@jg11804.t1		Entodon@jg11542.t1				CepurR40.4G171100	CepurR40.1G227400	CepurGG1@4G172700.1	CepurGG1@1G193700.1	Pp3c3_12090	Pp3c13_21730			12	scaffold-AWOI-2068596-Diphyscium_foliosum	cluster_0996	ABK3
abk3g00297	BA02G12860		Poh0317630				Hypnum@jg11815.t1		Entodon@jg11529.t1				CepurR40.4G172200	CepurR40.1G227700	CepurGG1@4G173900.1	CepurGG1@1G193200.1	Pp3c3_12210	Pp3c13_21760			10	scaffold-AWOI-2069268-Diphyscium_foliosum	cluster_0997	ABK3
abk3g00298	BA02G12860		Poh0317620				Hypnum@jg11815.t1		Entodon@jg11529.t1				CepurR40.4G172200	CepurR40.1G227700	CepurGG1@4G174000.1	CepurGG1@1G193300.1	Pp3c3_12220	Pp3c13_21760			10	#N/A	cluster_0998	ABK3
abk3g00353	BA02G09610		Poh0085010	Poh0052320			Hypnum@jg12946.t1		Entodon@jg10590.t1	Entodon@jg4565.t1	Sc_g00722		CepurR40.1G111600		CepurGG1@1G100700.1		Pp3c3_12740	Pp3c13_20770			11	scaffold-AWOI-2009014-Diphyscium_foliosum	cluster_0999	ABK3
abk3g00354	BA02G09610		Poh0085010	Poh0052320			Hypnum@jg12946.t1		Entodon@jg10590.t1	Entodon@jg4565.t1	Sc_g00722		CepurR40.1G111600	CepurR40.4G092400	CepurGG1@1G100700.1		Pp3c3_12740	Pp3c13_20770			12	scaffold-AWOI-2009014-Diphyscium_foliosum	cluster_1000	ABK3
abk3g00355	BA02G09600		Poh0085000	Poh0052310			Hypnum@jg12945.t1		Entodon@jg10591.t1		Sc_g00723		CepurR40.1G111700	CepurR40.4G092300	CepurGG1@1G100800.1	CepurGG1@4G092900.1	Pp3c3_12730				11	#N/A	cluster_1001	ABK3
abk3g00357	BA02G09600		Poh0085000	Poh0052310			Hypnum@jg12945.t1		Entodon@jg10591.t1		Sc_g00723		CepurR40.1G111700	CepurR40.4G092300	CepurGG1@1G100800.1	CepurGG1@4G092900.1	Pp3c3_12730				11	#N/A	cluster_1002	ABK3
abk3g00360	BA02G09590		Poh0085000	Poh0052310			Hypnum@jg12945.t1		Entodon@jg10591.t1		Sc_g00723		CepurR40.1G111700	CepurR40.4G092300	CepurGG1@1G100800.1	CepurGG1@4G092900.1	Pp3c3_12730				11	#N/A	cluster_1003	ABK3
abk3g00361	BA02G09620		Poh0085020	Poh0052330			Hypnum@jg12949.t1	Hypnum@jg23572.t1	Entodon@jg10587.t1	Entodon@jg4566.t1	Sc_g00721		CepurR40.1G111400	CepurR40.4G092600	CepurGG1@1G100600.1	CepurGG1@4G093200.1	Pp3c3_12760	Pp3c13_20730			14	scaffold-AWOI-2011141-Diphyscium_foliosum	cluster_1004	ABK3
abk3g00362	BA02G09600		Poh0085000	Poh0052310			Hypnum@jg12945.t1		Entodon@jg10591.t1		Sc_g00723		CepurR40.1G111700	CepurR40.4G092300	CepurGG1@1G100800.1	CepurGG1@4G092900.1	Pp3c3_12730				11	#N/A	cluster_1005	ABK3
abk3g00363	BA02G09620		Poh0085020	Poh0052330			Hypnum@jg12949.t1	Hypnum@jg23572.t1	Entodon@jg10587.t1	Entodon@jg4566.t1	Sc_g00721		CepurR40.1G111400	CepurR40.4G092600	CepurGG1@1G100600.1	CepurGG1@4G093200.1	Pp3c3_12760	Pp3c13_20730			14	scaffold-AWOI-2011141-Diphyscium_foliosum	cluster_1006	ABK3
abk3g00364	BA02G09600		Poh0085000	Poh0052310			Hypnum@jg12945.t1		Entodon@jg10591.t1		Sc_g00723		CepurR40.1G111700	CepurR40.4G092300	CepurGG1@1G100800.1	CepurGG1@4G092900.1	Pp3c3_12730				11	#N/A	cluster_1007	ABK3
abk3g00365	BA02G09600		Poh0085000	Poh0052310			Hypnum@jg12945.t1		Entodon@jg10591.t1		Sc_g00723		CepurR40.1G111700	CepurR40.4G092300	CepurGG1@1G100800.1	CepurGG1@4G092900.1	Pp3c3_12730				11	#N/A	cluster_1008	ABK3
abk3g00366	BA02G09590		Poh0085000	Poh0052310			Hypnum@jg12945.t1		Entodon@jg10591.t1		Sc_g00723		CepurR40.1G111700	CepurR40.4G092300	CepurGG1@1G100800.1	CepurGG1@4G092900.1	Pp3c3_12730				11	#N/A	cluster_1009	ABK3
abk3g00367	BA02G09610		Poh0085010	Poh0052320	Poh0122560	Poh0227580	Hypnum@jg12946.t1	Hypnum@jg23575.t1	Entodon@jg10590.t1	Entodon@jg4565.t1	Sc_g00722	Sc_g05184	CepurR40.1G111600	CepurR40.4G092400	CepurGG1@1G100700.1	CepurGG1@4G093100.1	Pp3c3_12740	Pp3c13_20770			17	scaffold-AWOI-2009014-Diphyscium_foliosum	cluster_1010	ABK3
abk3g00371	BA02G09610		Poh0085010	Poh0052320	Poh0122560	Poh0227580	Hypnum@jg12946.t1	Hypnum@jg23575.t1	Entodon@jg10590.t1	Entodon@jg4565.t1		Sc_g05184		CepurR40.4G092400		CepurGG1@4G093100.1	Pp3c3_12740	Pp3c13_20770			14	scaffold-AWOI-2009014-Diphyscium_foliosum	cluster_1011	ABK3
abk3g00372	BA02G09610		Poh0085010	Poh0052320	Poh0122560	Poh0227580	Hypnum@jg12946.t1	Hypnum@jg23575.t1	Entodon@jg10590.t1	Entodon@jg4565.t1		Sc_g05184		CepurR40.4G092400		CepurGG1@4G093100.1	Pp3c3_12740	Pp3c13_20770			14	scaffold-AWOI-2009014-Diphyscium_foliosum	cluster_1012	ABK3
abk3g00373	BA02G09610		Poh0085010	Poh0052320	Poh0122560	Poh0227580	Hypnum@jg12946.t1	Hypnum@jg23575.t1	Entodon@jg10590.t1	Entodon@jg4565.t1		Sc_g05184		CepurR40.4G092400		CepurGG1@4G093100.1	Pp3c3_12740	Pp3c13_20770			14	scaffold-AWOI-2009014-Diphyscium_foliosum	cluster_1013	ABK3
abk3g00374	BA02G09610		Poh0085010	Poh0052320	Poh0122560	Poh0227580	Hypnum@jg12946.t1	Hypnum@jg23575.t1	Entodon@jg10590.t1	Entodon@jg4565.t1	Sc_g00722	Sc_g05184		CepurR40.4G092400		CepurGG1@4G093100.1	Pp3c3_12740	Pp3c13_20770			15	scaffold-AWOI-2009014-Diphyscium_foliosum	cluster_1014	ABK3
abk3g00375	BA02G09610		Poh0085010	Poh0052320	Poh0122560	Poh0227580	Hypnum@jg12946.t1	Hypnum@jg23575.t1	Entodon@jg10590.t1	Entodon@jg4565.t1	Sc_g00722	Sc_g05184		CepurR40.4G092400	CepurGG1@1G100700.1	CepurGG1@4G093100.1	Pp3c3_12740	Pp3c13_20770			16	scaffold-AWOI-2009014-Diphyscium_foliosum	cluster_1015	ABK3
abk3g00376	BA02G09610		Poh0085010	Poh0052320	Poh0122560	Poh0227580	Hypnum@jg12946.t1	Hypnum@jg23575.t1	Entodon@jg10590.t1	Entodon@jg4565.t1	Sc_g00722	Sc_g05184	CepurR40.1G111600	CepurR40.4G092400	CepurGG1@1G100700.1	CepurGG1@4G093100.1	Pp3c3_12740	Pp3c13_20770			17	scaffold-AWOI-2009014-Diphyscium_foliosum	cluster_1016	ABK3
abk3g00377	BA02G09620		Poh0085020	Poh0052330	Poh0122540	Poh0227590	Hypnum@jg12949.t1	Hypnum@jg23572.t1	Entodon@jg10587.t1	Entodon@jg4566.t1	Sc_g00721		CepurR40.1G111400	CepurR40.4G092600	CepurGG1@1G100600.1	CepurGG1@4G093200.1	Pp3c3_12760	Pp3c13_20730			16	scaffold-AWOI-2011141-Diphyscium_foliosum	cluster_1017	ABK3
abk3g00378	BA02G09620		Poh0085020	Poh0052330	Poh0122540	Poh0227590	Hypnum@jg12949.t1	Hypnum@jg23572.t1	Entodon@jg10587.t1	Entodon@jg4566.t1	Sc_g00721		CepurR40.1G111400	CepurR40.4G092600	CepurGG1@1G100600.1	CepurGG1@4G093200.1	Pp3c3_12760	Pp3c13_20730			16	scaffold-AWOI-2011141-Diphyscium_foliosum	cluster_1018	ABK3
abk3g00379	BA02G09620		Poh0085020	Poh0052330	Poh0122540	Poh0227590	Hypnum@jg12949.t1	Hypnum@jg23572.t1	Entodon@jg10587.t1	Entodon@jg4566.t1	Sc_g00721		CepurR40.1G111400	CepurR40.4G092600	CepurGG1@1G100600.1	CepurGG1@4G093200.1	Pp3c3_12760	Pp3c13_20730			16	scaffold-AWOI-2011141-Diphyscium_foliosum	cluster_1019	ABK3
abk3g00384	BA02G09660		Poh0085070	Poh0052380	Poh0122510	Poh0227620	Hypnum@jg12956.t1	Hypnum@jg23588.t1	Entodon@jg10583.t1	Entodon@jg4553.t1	Sc_g00718	Sc_g05188	CepurR40.1G110900	CepurR40.4G093000	CepurGG1@1G100100.1	CepurGG1@4G093600.1	Pp3c3_12890	Pp3c13_20650			17	scaffold-AWOI-2012059-Diphyscium_foliosum	cluster_1020	ABK3
abk3g00461	BA02G09550	BA05G13360	Poh0052270	Poh0084960			Hypnum@jg12033.t1		Entodon@jg11318.t1			Sc_g01227	CepurR40.4G040600	CepurR40.1G155900	CepurGG1@4G037300.1	CepurGG1@1G152500.1		Pp3c26_3570			12	scaffold-HRWG-2069920-Buxbaumia_aphylla	cluster_1021	ABK3
abk3g00463	BA02G09580	BA05G13350	Poh0052280	Poh0084970			Hypnum@jg12942.t1					Sc_g01226	CepurR40.4G040400	CepurR40.1G155700	CepurGG1@4G037100.1	CepurGG1@1G152400.1	Pp3c3_14030	Pp3c26_3510			12	scaffold-AWOI-2010154-Diphyscium_foliosum	cluster_1022	ABK3
abk3g00475	BA02G09520	BA05G13280									Sc_g05303	Sc_g01230	CepurR40.4G040000	CepurR40.1G156400	CepurGG1@4G036900.1	CepurGG1@1G152900.1	Pp3c3_14080	Pp3c26_3620			10	scaffold-AWOI-2072174-Diphyscium_foliosum	cluster_1023	ABK3
abk3g00479	BA02G09500	BA05G13250	Poh0052240	Poh0084930							Sc_g05305		CepurR40.4G039500	CepurR40.1G156500	CepurGG1@4G036400.1	CepurGG1@1G153000.1	Pp3c3_14110	Pp3c26_3790			11	scaffold-AWOI-2073905-Diphyscium_foliosum	cluster_1024	ABK3
abk3g00488	BA02G09500	BA05G13250	Poh0052240	Poh0084930							Sc_g05305		CepurR40.4G039500	CepurR40.1G156500	CepurGG1@4G036400.1	CepurGG1@1G153000.1	Pp3c3_14110	Pp3c26_3790			11	scaffold-AWOI-2003938-Diphyscium_foliosum	cluster_1025	ABK3
abk3g00498	BA05G04420		Poh0315660	Poh0143600			Hypnum@jg22340.t1		Entodon@jg5596.t1		Sc_g04527		CepurR40.4G175500		CepurGG1@4G177600.1		Pp3c3_14200	Pp3c13_23730			10	scaffold-HRWG-2006222-Buxbaumia_aphylla	cluster_1026	ABK3
abk3g00519	BA05G04360		Poh0315530	Poh0143450			Hypnum@jg22367.t1		Entodon@jg5573.t1		Sc_g04549		CepurR40.4G173500		CepurGG1@4G175500.1		Pp3c3_14390	Pp3c13_23680			10	scaffold-AWOI-2011455-Diphyscium_foliosum	cluster_1027	ABK3
abk3g00523	BA05G04360		Poh0315530	Poh0143450			Hypnum@jg22367.t1		Entodon@jg5573.t1		Sc_g04549		CepurR40.4G173500		CepurGG1@4G175500.1		Pp3c3_14390	Pp3c13_23680			10	scaffold-AWOI-2011455-Diphyscium_foliosum	cluster_1028	ABK3
abk3g00575	BA05G13060		Poh0125110	Poh0230410			Hypnum@jg23266.t1		Entodon@jg4800.t1		Sc_g01368	Sc_g05401	CepurR40.1G174600	CepurR40.4G037900	CepurGG1@4G035300.1	CepurGG1@1G171300.1	Pp3c3_15000				12	scaffold-AWOI-2011291-Diphyscium_foliosum	cluster_1029	ABK3
abk3g00582		BA05G11370	Poh0125170	Poh0230460			Hypnum@jg23275.t1		Entodon@jg4793.t1			Sc_g05406		CepurR40.4G037500	CepurGG1@4G034700.1		Pp3c26_5120	Pp3c4_25990			10	scaffold-AWOI-2071465-Diphyscium_foliosum	cluster_1030	ABK3
abk3g00583		BA05G11370	Poh0125170	Poh0230460			Hypnum@jg23275.t1		Entodon@jg4793.t1			Sc_g05406		CepurR40.4G037500	CepurGG1@4G034700.1		Pp3c26_5120	Pp3c4_25990			10	scaffold-AWOI-2071465-Diphyscium_foliosum	cluster_1031	ABK3
abk3g00586		BA05G11380	Poh0125180	Poh0230470				Hypnum@jg12114.t1	Entodon@jg4792.t1	Entodon@jg11245.t1	Sc_g01367		CepurR40.1G173500	CepurR40.4G037400	CepurGG1@4G034600.1	CepurGG1@1G170100.1					11	scaffold-HRWG-2013987-Buxbaumia_aphylla	cluster_1032	ABK3
abk3g00587		BA05G11380	Poh0125180	Poh0230470			Hypnum@jg23276.t1	Hypnum@jg12114.t1	Entodon@jg4792.t1	Entodon@jg11245.t1	Sc_g01367	Sc_g05408	CepurR40.1G173500	CepurR40.4G037400	CepurGG1@4G034600.1	CepurGG1@1G170100.1	Pp3c26_5090				14	scaffold-HRWG-2013987-Buxbaumia_aphylla	cluster_1033	ABK3
abk3g00588		BA05G11380	Poh0125180	Poh0230470			Hypnum@jg23276.t1	Hypnum@jg12114.t1	Entodon@jg4792.t1	Entodon@jg11245.t1	Sc_g01367	Sc_g05408	CepurR40.1G173500	CepurR40.4G037400	CepurGG1@4G034600.1	CepurGG1@1G170100.1	Pp3c26_5090				14	scaffold-HRWG-2013987-Buxbaumia_aphylla	cluster_1034	ABK3
abk3g00589	BA05G13060		Poh0125110	Poh0230410			Hypnum@jg23266.t1		Entodon@jg4800.t1		Sc_g01368	Sc_g05401	CepurR40.1G174600	CepurR40.4G037900	CepurGG1@4G035300.1	CepurGG1@1G171300.1	Pp3c26_5390				12	scaffold-AWOI-2011291-Diphyscium_foliosum	cluster_1035	ABK3
abk3g00590	BA05G13060		Poh0125110	Poh0230410			Hypnum@jg23266.t1		Entodon@jg4800.t1		Sc_g01368	Sc_g05401	CepurR40.1G174600	CepurR40.4G037900	CepurGG1@4G035300.1	CepurGG1@1G171300.1	Pp3c26_5390				12	scaffold-AWOI-2011291-Diphyscium_foliosum	cluster_1036	ABK3
abk3g00592		BA05G11370	Poh0125170	Poh0230460			Hypnum@jg23275.t1		Entodon@jg4793.t1			Sc_g05406		CepurR40.4G037500	CepurGG1@4G034700.1		Pp3c26_5120	Pp3c4_25990			10	scaffold-AWOI-2071465-Diphyscium_foliosum	cluster_1037	ABK3
abk3g00593		BA05G11370	Poh0125170	Poh0230460			Hypnum@jg23275.t1		Entodon@jg4793.t1			Sc_g05406		CepurR40.4G037500	CepurGG1@4G034700.1		Pp3c26_5120	Pp3c4_25990			10	scaffold-AWOI-2071465-Diphyscium_foliosum	cluster_1038	ABK3
abk3g00594		BA05G11370	Poh0125170	Poh0230460			Hypnum@jg23275.t1		Entodon@jg4793.t1			Sc_g05406		CepurR40.4G037500	CepurGG1@4G034700.1		Pp3c26_5120	Pp3c4_25990			10	scaffold-AWOI-2071465-Diphyscium_foliosum	cluster_1039	ABK3
abk3g00604			Poh0125180	Poh0230470			Hypnum@jg23276.t1	Hypnum@jg12114.t1	Entodon@jg4792.t1	Entodon@jg11245.t1	Sc_g01367		CepurR40.1G173500		CepurGG1@4G034600.1	CepurGG1@1G170100.1	Pp3c3_15040				11	scaffold-HRWG-2013987-Buxbaumia_aphylla	cluster_1040	ABK3
abk3g00618		BA05G11430	Poh0125210				Hypnum@jg23290.t1	Hypnum@jg12105.t1	Entodon@jg4781.t1	Entodon@jg11252.t1	Sc_g01365		CepurR40.1G172700	CepurR40.4G036500	CepurGG1@4G033300.1	CepurGG1@1G169300.1	Pp3c3_15220	Pp3c4_26070			13	scaffold-AWOI-2002339-Diphyscium_foliosum	cluster_1041	ABK3
abk3g00619		BA05G11430	Poh0125210	Poh0230530			Hypnum@jg23290.t1	Hypnum@jg12105.t1	Entodon@jg4781.t1	Entodon@jg11252.t1	Sc_g01365		CepurR40.1G172700	CepurR40.4G036500	CepurGG1@4G033300.1	CepurGG1@1G169300.1	Pp3c3_15220	Pp3c4_26070			14	scaffold-AWOI-2002339-Diphyscium_foliosum	cluster_1042	ABK3
abk3g00620		BA05G11430	Poh0125210	Poh0230530			Hypnum@jg23290.t1	Hypnum@jg12105.t1	Entodon@jg4781.t1	Entodon@jg11252.t1	Sc_g01365		CepurR40.1G172700	CepurR40.4G036500	CepurGG1@4G033300.1	CepurGG1@1G169300.1	Pp3c3_15220	Pp3c4_26070			14	scaffold-AWOI-2002339-Diphyscium_foliosum	cluster_1043	ABK3
abk3g00621		BA05G11430		Poh0230530			Hypnum@jg23290.t1	Hypnum@jg12105.t1	Entodon@jg4781.t1	Entodon@jg11252.t1	Sc_g01365		CepurR40.1G172700	CepurR40.4G036500	CepurGG1@4G033300.1	CepurGG1@1G169300.1	Pp3c3_15220	Pp3c4_26070			13	scaffold-AWOI-2002339-Diphyscium_foliosum	cluster_1044	ABK3
abk3g00622		BA05G11430					Hypnum@jg23290.t1	Hypnum@jg12105.t1	Entodon@jg4781.t1	Entodon@jg11252.t1	Sc_g01365		CepurR40.1G172700	CepurR40.4G036500	CepurGG1@4G033300.1	CepurGG1@1G169300.1	Pp3c3_15220	Pp3c4_26070			12	scaffold-AWOI-2002339-Diphyscium_foliosum	cluster_1045	ABK3
abk3g00623		BA05G11430	Poh0051740				Hypnum@jg23290.t1	Hypnum@jg12105.t1	Entodon@jg4781.t1	Entodon@jg11252.t1	Sc_g01365		CepurR40.1G172700	CepurR40.4G036500	CepurGG1@4G033300.1	CepurGG1@1G169300.1	Pp3c3_15220	Pp3c4_26070			13	scaffold-AWOI-2002339-Diphyscium_foliosum	cluster_1046	ABK3
abk3g00624		BA05G11490	Poh0125200	Poh0230520			Hypnum@jg23283.t1	Hypnum@jg12108.t1	Entodon@jg4785.t1	Entodon@jg11250.t1	Sc_g01366		CepurR40.1G172800	CepurR40.4G036700	CepurGG1@4G033500.1	CepurGG1@1G169400.1	Pp3c3_15190	Pp3c4_26050			14	#N/A	cluster_1047	ABK3
abk3g00626		BA05G11490	Poh0125200	Poh0230520			Hypnum@jg23283.t1	Hypnum@jg12108.t1	Entodon@jg4785.t1	Entodon@jg11250.t1	Sc_g01366		CepurR40.1G172800	CepurR40.4G036700	CepurGG1@4G033500.1	CepurGG1@1G169400.1	Pp3c3_15190	Pp3c4_26050			14	#N/A	cluster_1048	ABK3
abk3g00627		BA05G11490	Poh0125200	Poh0230520			Hypnum@jg23283.t1	Hypnum@jg12108.t1	Entodon@jg4785.t1	Entodon@jg11250.t1	Sc_g01366		CepurR40.1G172800	CepurR40.4G036700	CepurGG1@4G033500.1	CepurGG1@1G169400.1	Pp3c3_15190	Pp3c4_26050			14	#N/A	cluster_1049	ABK3
abk3g00628		BA05G11490	Poh0125200	Poh0230520			Hypnum@jg23283.t1	Hypnum@jg12108.t1	Entodon@jg4785.t1	Entodon@jg11250.t1	Sc_g01366		CepurR40.1G172800		CepurGG1@4G033500.1	CepurGG1@1G169400.1	Pp3c3_15190	Pp3c4_26050			13	#N/A	cluster_1050	ABK3
abk3g00629		BA05G11430	Poh0125210	Poh0230530			Hypnum@jg23290.t1	Hypnum@jg12105.t1	Entodon@jg4781.t1	Entodon@jg11252.t1	Sc_g01365		CepurR40.1G172700	CepurR40.4G036500	CepurGG1@4G033300.1	CepurGG1@1G169300.1	Pp3c3_15220	Pp3c4_26070			14	scaffold-AWOI-2002339-Diphyscium_foliosum	cluster_1051	ABK3
abk3g00652	BA05G12620		Poh0229370				Hypnum@jg23337.t1		Entodon@jg4745.t1		Sc_g01380		CepurR40.1G171100	CepurR40.4G118500	CepurGG1@4G118800.1	CepurGG1@1G167700.1	Pp3c3_15340				10	scaffold-AWOI-2073855-Diphyscium_foliosum	cluster_1052	ABK3
abk3g00657	BA05G12620		Poh0229350				Hypnum@jg23337.t1		Entodon@jg4746.t1		Sc_g01380		CepurR40.1G171100	CepurR40.4G118500	CepurGG1@4G118800.1	CepurGG1@1G167700.1	Pp3c3_15340				10	scaffold-AWOI-2073855-Diphyscium_foliosum	cluster_1053	ABK3
abk3g00659	BA05G12620		Poh0229370				Hypnum@jg23337.t1		Entodon@jg4746.t1		Sc_g01380		CepurR40.1G171100	CepurR40.4G118500	CepurGG1@4G118800.1	CepurGG1@1G167700.1	Pp3c3_15340				10	scaffold-AWOI-2073855-Diphyscium_foliosum	cluster_1054	ABK3
abk3g00660	BA05G12590		Poh0229350				Hypnum@jg23335.t1		Entodon@jg4746.t1		Sc_g01380		CepurR40.1G171100	CepurR40.4G118500	CepurGG1@4G118800.1	CepurGG1@1G167700.1	Pp3c3_15340				10	scaffold-AWOI-2073855-Diphyscium_foliosum	cluster_1055	ABK3
abk3g00663	BA05G12590		Poh0229350				Hypnum@jg23337.t1		Entodon@jg4746.t1		Sc_g01380		CepurR40.1G171100	CepurR40.4G118500	CepurGG1@4G118800.1	CepurGG1@1G167700.1	Pp3c3_15340				10	scaffold-AWOI-2073855-Diphyscium_foliosum	cluster_1056	ABK3
abk3g00665	BA05G12590		Poh0229350				Hypnum@jg23335.t1		Entodon@jg4746.t1		Sc_g01380		CepurR40.1G171100	CepurR40.4G118500	CepurGG1@4G118800.1	CepurGG1@1G167700.1	Pp3c3_15340				10	scaffold-AWOI-2073855-Diphyscium_foliosum	cluster_1057	ABK3
abk3g00706	BA05G12720	BA02G06780	Poh0123700	Poh0229300	Poh0052180	Poh0084860	Hypnum@jg23355.t1	Hypnum@jg12710.t1	Entodon@jg4733.t1	Entodon@jg10337.t1	Sc_g04804		CepurR40.1G138400	CepurR40.4G115000	CepurGG1@1G133300.1	CepurGG1@4G114900.1	Pp3c3_15800	Pp3c13_14480			17	scaffold-AWOI-2010967-Diphyscium_foliosum	cluster_1058	ABK3
abk3g00708	BA05G12720	BA02G06780	Poh0123700	Poh0229300	Poh0052180	Poh0084860	Hypnum@jg23355.t1	Hypnum@jg12710.t1	Entodon@jg4733.t1	Entodon@jg10337.t1	Sc_g04804		CepurR40.1G138400	CepurR40.4G115000	CepurGG1@1G133300.1	CepurGG1@4G114900.1	Pp3c3_15800	Pp3c13_14480			17	scaffold-AWOI-2010967-Diphyscium_foliosum	cluster_1059	ABK3
abk3g00709	BA05G12720		Poh0123700	Poh0229300	Poh0052180	Poh0084860	Hypnum@jg23355.t1	Hypnum@jg12710.t1	Entodon@jg4733.t1	Entodon@jg10337.t1	Sc_g04804		CepurR40.1G138400	CepurR40.4G115000	CepurGG1@1G133300.1	CepurGG1@4G114900.1		Pp3c13_14480			15	scaffold-AWOI-2010967-Diphyscium_foliosum	cluster_1060	ABK3
abk3g00710	BA05G12730		Poh0123690	Poh0229310			Hypnum@jg23353.t1		Entodon@jg4734.t1		Sc_g04803		CepurR40.1G137600	CepurR40.4G114700	CepurGG1@1G132400.1	CepurGG1@4G114600.1	Pp3c3_15780				11	scaffold-AWOI-2010325-Diphyscium_foliosum	cluster_1061	ABK3
abk3g00712	BA05G12720		Poh0123700	Poh0229300	Poh0052180	Poh0084860	Hypnum@jg23356.t1	Hypnum@jg12710.t1	Entodon@jg4733.t1	Entodon@jg10337.t1	Sc_g04804		CepurR40.1G138400	CepurR40.4G115000	CepurGG1@1G133300.1	CepurGG1@4G114900.1		Pp3c13_14480			15	#N/A	cluster_1062	ABK3
abk3g00715	BA05G12730		Poh0123690	Poh0229310			Hypnum@jg23353.t1		Entodon@jg4734.t1		Sc_g04803		CepurR40.1G137600	CepurR40.4G114700	CepurGG1@1G132400.1	CepurGG1@4G114600.1	Pp3c3_15780				11	scaffold-AWOI-2010325-Diphyscium_foliosum	cluster_1063	ABK3
abk3g00716	BA05G12730		Poh0123690	Poh0229310			Hypnum@jg23353.t1		Entodon@jg4734.t1		Sc_g04803		CepurR40.1G137600	CepurR40.4G114700	CepurGG1@1G132400.1	CepurGG1@4G114600.1	Pp3c3_15780				11	scaffold-AWOI-2010326-Diphyscium_foliosum	cluster_1064	ABK3
abk3g00718	BA05G12730		Poh0123690	Poh0229310			Hypnum@jg23353.t1		Entodon@jg4734.t1		Sc_g04803		CepurR40.1G137600	CepurR40.4G114700	CepurGG1@1G132400.1	CepurGG1@4G114600.1	Pp3c3_15780				11	scaffold-AWOI-2010325-Diphyscium_foliosum	cluster_1065	ABK3
abk3g00719	BA05G12720	BA02G06780	Poh0123700				Hypnum@jg23355.t1	Hypnum@jg12710.t1	Entodon@jg4733.t1	Entodon@jg10337.t1	Sc_g04804		CepurR40.1G138400	CepurR40.4G115000	CepurGG1@1G133300.1	CepurGG1@4G114900.1	Pp3c3_15800	Pp3c13_14480			14	scaffold-HRWG-2017439-Buxbaumia_aphylla	cluster_1066	ABK3
abk3g00721	BA05G12680		Poh0123740	Poh0229260			Hypnum@jg23359.t1		Entodon@jg4730.t1		Sc_g04806		CepurR40.1G138700	CepurR40.4G115300	CepurGG1@1G133600.1	CepurGG1@4G115200.1	Pp3c3_15840				11	scaffold-AWOI-2070326-Diphyscium_foliosum	cluster_1067	ABK3
abk3g00722	BA05G12660	BA02G06670	Poh0123730	Poh0229270			Hypnum@jg23361.t1	Hypnum@jg12705.t1	Entodon@jg4729.t1	Entodon@jg10333.t1			CepurR40.1G138800	CepurR40.4G116100	CepurGG1@1G133700.1	CepurGG1@4G115800.1		Pp3c13_14430			13	scaffold-AWOI-2072298-Diphyscium_foliosum	cluster_1068	ABK3
abk3g00723	BA05G12680		Poh0123740	Poh0229260			Hypnum@jg23359.t1		Entodon@jg4730.t1		Sc_g04806		CepurR40.1G138700	CepurR40.4G115300	CepurGG1@1G133600.1	CepurGG1@4G115200.1	Pp3c3_15840				11	scaffold-AWOI-2070326-Diphyscium_foliosum	cluster_1069	ABK3
abk3g00724	BA05G12700		Poh0123710	Poh0229280			Hypnum@jg23364.t1		Entodon@jg4725.t1		Sc_g04805		CepurR40.1G138900	CepurR40.4G116300	CepurGG1@1G133800.1	CepurGG1@4G116000.1	Pp3c3_15850	Pp3c13_14400			12	scaffold-AWOI-2002623-Diphyscium_foliosum	cluster_1070	ABK3
abk3g00746	BA05G12760		Poh0123670	Poh0229330			Hypnum@jg23344.t1		Entodon@jg4739.t1		Sc_g04814	Sc_g01144		CepurR40.4G117600		CepurGG1@4G117800.1	Pp3c3_16200				10	scaffold-AWOI-2014074-Diphyscium_foliosum	cluster_1071	ABK3
abk3g00820		BA05G11300			Poh0123160	Poh0229880	Hypnum@jg23439.t1			Entodon@jg4674.t1		Sc_g01590	CepurR40.1G147300	CepurR40.4G183400	CepurGG1@1G143500.1	CepurGG1@4G186000.1	Pp3c3_17030				11	scaffold-AWOI-2071660-Diphyscium_foliosum	cluster_1072	ABK3
abk3g00822	BA02G06310	BA05G11280			Poh0123180	Poh0229840	Hypnum@jg23443.t1		Entodon@jg10183.t1	Entodon@jg4668.t1	Sc_g01183		CepurR40.1G147000	CepurR40.4G183900	CepurGG1@1G143200.1	CepurGG1@4G186600.1		Pp3c12_7930			13	scaffold-AWOI-2003039-Diphyscium_foliosum	cluster_1073	ABK3
abk3g00825	BA02G06310				Poh0123180	Poh0229840	Hypnum@jg23443.t1		Entodon@jg10183.t1	Entodon@jg4668.t1	Sc_g01183		CepurR40.1G147000	CepurR40.4G183900	CepurGG1@1G143200.1	CepurGG1@4G186600.1		Pp3c12_7930			12	scaffold-AWOI-2003039-Diphyscium_foliosum	cluster_1074	ABK3
abk3g00827	BA02G06280	BA05G11290	Poh0218580	Poh0049840	Poh0123170	Poh0229860	Hypnum@jg12638.t1		Entodon@jg10185.t1	Entodon@jg4670.t1				CepurR40.4G183800		CepurGG1@4G186400.1		Pp3c12_7940			12	scaffold-AWOI-2012555-Diphyscium_foliosum	cluster_1075	ABK3
abk3g00828	BA02G06280	BA05G11290	Poh0218580	Poh0049840	Poh0123170	Poh0229860	Hypnum@jg12638.t1		Entodon@jg10185.t1	Entodon@jg4670.t1				CepurR40.4G183800		CepurGG1@4G186400.1		Pp3c12_7940			12	scaffold-AWOI-2012555-Diphyscium_foliosum	cluster_1076	ABK3
abk3g00852	BA02G06370		Poh0218660	Poh0049890	Poh0229810	Poh0123220	Hypnum@jg12649.t1	Hypnum@jg23445.t1	Entodon@jg10173.t1		Sc_g01175		CepurR40.1G146200		CepurGG1@1G142400.1		Pp3c3_17130	Pp3c12_7920			13	scaffold-HRWG-2013864-Buxbaumia_aphylla	cluster_1077	ABK3
abk3g00853	BA02G06370		Poh0218660	Poh0049890	Poh0229810	Poh0123220	Hypnum@jg12649.t1	Hypnum@jg23445.t1	Entodon@jg10173.t1		Sc_g01175		CepurR40.1G146200		CepurGG1@1G142400.1		Pp3c3_17130	Pp3c12_7920			13	scaffold-HRWG-2013864-Buxbaumia_aphylla	cluster_1078	ABK3
abk3g00854	BA02G06370		Poh0218660	Poh0049890	Poh0229810	Poh0123220	Hypnum@jg12649.t1	Hypnum@jg23445.t1	Entodon@jg10173.t1		Sc_g01175		CepurR40.1G146200		CepurGG1@1G142400.1		Pp3c3_17130	Pp3c12_7920			13	scaffold-HRWG-2013864-Buxbaumia_aphylla	cluster_1079	ABK3
abk3g00855	BA02G06360	BA05G11270	Poh0218650		Poh0229820	Poh0123210	Hypnum@jg12650.t1	Hypnum@jg23444.t1	Entodon@jg10172.t1		Sc_g01174		CepurR40.1G146300		CepurGG1@1G142500.1		Pp3c3_17120				12	scaffold-HRWG-2068523-Buxbaumia_aphylla	cluster_1080	ABK3
abk3g00857	BA02G06360	BA05G11270	Poh0218650		Poh0229820	Poh0123210	Hypnum@jg12650.t1	Hypnum@jg23444.t1	Entodon@jg10172.t1		Sc_g01174		CepurR40.1G146300		CepurGG1@1G142500.1		Pp3c3_17120				12	scaffold-HRWG-2068523-Buxbaumia_aphylla	cluster_1081	ABK3
abk3g00858	BA02G06360	BA05G11270	Poh0218650		Poh0229820	Poh0123210	Hypnum@jg12650.t1	Hypnum@jg23444.t1	Entodon@jg10172.t1		Sc_g01174		CepurR40.1G146300		CepurGG1@1G142500.1		Pp3c3_17120				12	scaffold-HRWG-2068523-Buxbaumia_aphylla	cluster_1082	ABK3
abk3g00860	BA02G06360	BA05G11270	Poh0218650		Poh0229820	Poh0123210	Hypnum@jg12650.t1	Hypnum@jg23444.t1	Entodon@jg10172.t1		Sc_g01174		CepurR40.1G146300		CepurGG1@1G142500.1		Pp3c3_17120				12	scaffold-HRWG-2068523-Buxbaumia_aphylla	cluster_1083	ABK3
abk3g00862	BA02G06360	BA05G11270	Poh0218650		Poh0229820	Poh0123210	Hypnum@jg12650.t1	Hypnum@jg23444.t1	Entodon@jg10172.t1		Sc_g01174		CepurR40.1G146300		CepurGG1@1G142500.1		Pp3c3_17120				12	scaffold-HRWG-2068523-Buxbaumia_aphylla	cluster_1084	ABK3
abk3g00863	BA02G06360	BA05G11270	Poh0218650		Poh0229820	Poh0123210	Hypnum@jg12650.t1	Hypnum@jg23444.t1	Entodon@jg10172.t1		Sc_g01174		CepurR40.1G146300		CepurGG1@1G142500.1		Pp3c3_17120				12	scaffold-HRWG-2068523-Buxbaumia_aphylla	cluster_1085	ABK3
abk3g00864	BA02G06370		Poh0218660	Poh0049890	Poh0229810	Poh0123220	Hypnum@jg12649.t1	Hypnum@jg23445.t1	Entodon@jg10173.t1		Sc_g01175		CepurR40.1G146200		CepurGG1@1G142400.1		Pp3c3_17130	Pp3c12_7920			13	scaffold-HRWG-2013864-Buxbaumia_aphylla	cluster_1086	ABK3
abk3g00866	BA02G06370		Poh0218660	Poh0049890	Poh0229810	Poh0123220	Hypnum@jg12649.t1	Hypnum@jg23445.t1	Entodon@jg10173.t1		Sc_g01175		CepurR40.1G146200				Pp3c3_17130	Pp3c12_7920			12	scaffold-HRWG-2013864-Buxbaumia_aphylla	cluster_1087	ABK3
abk3g00867	BA02G06370		Poh0218660	Poh0049890	Poh0229810	Poh0123220	Hypnum@jg12649.t1	Hypnum@jg23445.t1	Entodon@jg10173.t1		Sc_g01175		CepurR40.1G146200		CepurGG1@1G142400.1		Pp3c3_17130	Pp3c12_7920			13	scaffold-HRWG-2013864-Buxbaumia_aphylla	cluster_1088	ABK3
abk3g00868	BA02G06370		Poh0218660	Poh0049890	Poh0229810	Poh0123220	Hypnum@jg12649.t1	Hypnum@jg23445.t1	Entodon@jg10173.t1		Sc_g01175		CepurR40.1G146200		CepurGG1@1G142400.1		Pp3c3_17130	Pp3c12_7920			13	scaffold-HRWG-2013864-Buxbaumia_aphylla	cluster_1089	ABK3
abk3g00874	BA02G06380		Poh0218670	Poh0049900			Hypnum@jg12651.t1			Entodon@jg10275.t1	Sc_g01178		CepurR40.1G145300		CepurGG1@1G141100.1		Pp3c3_17230	Pp3c13_13680			10	scaffold-HRWG-2001730-Buxbaumia_aphylla	cluster_1090	ABK3
abk3g00888	BA02G06440		Poh0218730	Poh0049980			Hypnum@jg12659.t1			Entodon@jg10283.t1	Sc_g01189		CepurR40.1G144800		CepurGG1@1G140500.1		Pp3c3_17280	Pp3c13_13820			10	scaffold-AWOI-2010809-Diphyscium_foliosum	cluster_1091	ABK3
abk3g00890	BA02G06430		Poh0218740	Poh0049990			Hypnum@jg12665.t1			Entodon@jg10286.t1	Sc_g01186	Sc_g04922	CepurR40.1G144500	CepurR40.4G124300	CepurGG1@1G140300.1	CepurGG1@4G125500.1	Pp3c3_17340				12	scaffold-HRWG-2015648-Buxbaumia_aphylla	cluster_1092	ABK3
abk3g00896	BA02G06600	BA05G10890	Poh0218970	Poh0050250	Poh0229530	Poh0123490		Hypnum@jg23480.t1	Entodon@jg4634.t1		Sc_g01191	Sc_g04941	CepurR40.1G141400	CepurR40.4G123000	CepurGG1@1G136300.1	CepurGG1@4G124100.1	Pp3c3_17400	Pp3c13_13940			16	scaffold-AWOI-2010131-Diphyscium_foliosum	cluster_1093	ABK3
abk3g00899		BA05G10860	Poh0218980	Poh0050260	Poh0229490	Poh0123530	Hypnum@jg12686.t1		Entodon@jg4631.t1	Entodon@jg10314.t1		Sc_g04938		CepurR40.4G123300		CepurGG1@4G124400.1	Pp3c3_17440	Pp3c13_13930			13	#N/A	cluster_1094	ABK3
abk3g00901		BA05G10860	Poh0218980	Poh0050260	Poh0229490	Poh0123530	Hypnum@jg12686.t1		Entodon@jg4631.t1	Entodon@jg10314.t1		Sc_g04938		CepurR40.4G123300		CepurGG1@4G124400.1	Pp3c3_17480	Pp3c13_13930			13	scaffold-HRWG-2001085-Buxbaumia_aphylla	cluster_1095	ABK3
abk3g00904	BA02G06600	BA05G10890	Poh0218970	Poh0050250	Poh0229530	Poh0123490		Hypnum@jg23480.t1	Entodon@jg4634.t1		Sc_g01191	Sc_g04941	CepurR40.1G141400	CepurR40.4G123000	CepurGG1@1G136300.1	CepurGG1@4G124100.1	Pp3c3_17520	Pp3c13_13940			16	scaffold-AWOI-2010131-Diphyscium_foliosum	cluster_1096	ABK3
abk3g00911	BA02G06720		Poh0218890	Poh0050080			Hypnum@jg12704.t1		Entodon@jg4620.t1	Entodon@jg10332.t1		Sc_g04955	CepurR40.1G139800	CepurR40.4G120600	CepurGG1@1G134700.1	CepurGG1@4G121700.1	Pp3c3_17650	Pp3c13_14180			13	scaffold-AWOI-2011302-Diphyscium_foliosum	cluster_1097	ABK3
abk3g00913	BA02G06720		Poh0218890	Poh0050080			Hypnum@jg12704.t1		Entodon@jg4620.t1	Entodon@jg10332.t1		Sc_g04955	CepurR40.1G139800	CepurR40.4G120600	CepurGG1@1G134700.1	CepurGG1@4G121700.1	Pp3c3_17650	Pp3c13_14180			13	scaffold-AWOI-2011302-Diphyscium_foliosum	cluster_1098	ABK3
abk3g00916		BA05G10790			Poh0229420	Poh0123390			Entodon@jg4623.t1			Sc_g04957	CepurR40.1G140100	CepurR40.4G121200	CepurGG1@1G135000.1	CepurGG1@4G122100.1	Pp3c3_17710	Pp3c13_14170	Pp3c4_17450		12	scaffold-AWOI-2001159-Diphyscium_foliosum	cluster_1099	ABK3
abk3g00919		BA05G10990			Poh0229580	Poh0123440		Hypnum@jg23472.t1	Entodon@jg4644.t1			Sc_g04951	CepurR40.1G140600		CepurGG1@1G135500.1		Pp3c3_17750		Pp3c4_17130		10	scaffold-AWOI-2072304-Diphyscium_foliosum	cluster_1100	ABK3
abk3g00922		BA05G10990			Poh0229580	Poh0123440		Hypnum@jg23472.t1	Entodon@jg4644.t1			Sc_g04951	CepurR40.1G140600		CepurGG1@1G135500.1		Pp3c3_17750		Pp3c4_17130		10	scaffold-AWOI-2072304-Diphyscium_foliosum	cluster_1101	ABK3
abk3g00926		BA05G10990			Poh0229580	Poh0123440		Hypnum@jg23472.t1	Entodon@jg4644.t1			Sc_g04951	CepurR40.1G140600		CepurGG1@1G135500.1		Pp3c3_17750		Pp3c4_17130		10	scaffold-AWOI-2072304-Diphyscium_foliosum	cluster_1102	ABK3
abk3g00927		BA05G10990			Poh0229580	Poh0123440		Hypnum@jg23472.t1	Entodon@jg4644.t1			Sc_g04951	CepurR40.1G140600		CepurGG1@1G135500.1		Pp3c3_17750		Pp3c4_17130		10	scaffold-AWOI-2072304-Diphyscium_foliosum	cluster_1103	ABK3
abk3g00928		BA05G10950			Poh0229560	Poh0123460		Hypnum@jg23475.t1	Entodon@jg4640.t1			Sc_g04944		CepurR40.4G122500		CepurGG1@4G123500.1	Pp3c3_17780	Pp3c13_14120	Pp3c4_17160		11	scaffold-AWOI-2014425-Diphyscium_foliosum	cluster_1104	ABK3
abk3g00931		BA05G10990			Poh0229580	Poh0123440		Hypnum@jg23472.t1	Entodon@jg4644.t1			Sc_g04951	CepurR40.1G140600		CepurGG1@1G135500.1		Pp3c3_17750		Pp3c4_17130		10	scaffold-AWOI-2072304-Diphyscium_foliosum	cluster_1105	ABK3
abk3g00932		BA05G10950			Poh0229560	Poh0123460		Hypnum@jg23475.t1	Entodon@jg4640.t1			Sc_g04944		CepurR40.4G122500		CepurGG1@4G123500.1	Pp3c3_17780	Pp3c13_14120	Pp3c4_17160		11	scaffold-AWOI-2014425-Diphyscium_foliosum	cluster_1106	ABK3
abk3g00952	BA02G08770		Poh0087800	Poh0055160	Poh0122260	Poh0227410	Hypnum@jg12230.t1		Entodon@jg11133.t1		Sc_g01081		CepurR40.1G101900		CepurGG1@1G109500.1		Pp3c3_18130				11	scaffold-HRWG-2009248-Buxbaumia_aphylla	cluster_1107	ABK3
abk3g00959	BA02G08770		Poh0087800	Poh0055160	Poh0122260	Poh0227410	Hypnum@jg12230.t1		Entodon@jg11133.t1		Sc_g01081		CepurR40.1G101900		CepurGG1@1G109500.1		Pp3c3_18290				11	scaffold-AWOI-2002309-Diphyscium_foliosum	cluster_1108	ABK3
abk3g00962	BA02G08770		Poh0087800	Poh0055160	Poh0122260	Poh0227410	Hypnum@jg12230.t1		Entodon@jg11133.t1		Sc_g01081		CepurR40.1G101900		CepurGG1@1G109500.1		Pp3c3_18320				11	scaffold-HRWG-2010910-Buxbaumia_aphylla	cluster_1109	ABK3
abk3g00963	BA02G08770		Poh0087800	Poh0055160	Poh0122260	Poh0227410	Hypnum@jg12230.t1		Entodon@jg11133.t1		Sc_g01081		CepurR40.1G101900		CepurGG1@1G109500.1		Pp3c3_18320				11	scaffold-AWOI-2002309-Diphyscium_foliosum	cluster_1110	ABK3
abk3g00971	BA02G08800	BA05G09700	Poh0087830	Poh0055190	Poh0122250	Poh0227390					Sc_g01085		CepurR40.1G101500		CepurGG1@1G109100.1		Pp3c3_18340				10	scaffold-AWOI-2070714-Diphyscium_foliosum	cluster_1111	ABK3
abk3g00972	BA02G08790	BA05G09690	Poh0087820	Poh0055180			Hypnum@jg12226.t1		Entodon@jg11144.t1		Sc_g01084		CepurR40.1G101600		CepurGG1@1G109200.1		Pp3c3_18330				10	#N/A	cluster_1112	ABK3
abk3g00976	BA02G08790	BA05G09690	Poh0087820	Poh0055180			Hypnum@jg12226.t1		Entodon@jg11144.t1		Sc_g01084		CepurR40.1G101600		CepurGG1@1G109200.1		Pp3c3_18330				10	#N/A	cluster_1113	ABK3
abk3g00977	BA02G08790	BA05G09690	Poh0087820	Poh0055180			Hypnum@jg12226.t1		Entodon@jg11144.t1		Sc_g01084		CepurR40.1G101600		CepurGG1@1G109200.1		Pp3c3_18330				10	#N/A	cluster_1114	ABK3
abk3g00978	BA02G08800	BA05G09700	Poh0087830	Poh0055190	Poh0122250	Poh0227390					Sc_g01085		CepurR40.1G101500		CepurGG1@1G109100.1		Pp3c3_18340				10	scaffold-AWOI-2070714-Diphyscium_foliosum	cluster_1115	ABK3
abk3g00980	BA02G08800	BA05G09700	Poh0087830	Poh0055190	Poh0122250	Poh0227390					Sc_g01085		CepurR40.1G101500		CepurGG1@1G109100.1		Pp3c3_18340				10	scaffold-AWOI-2070714-Diphyscium_foliosum	cluster_1116	ABK3
abk3g00985	BA02G08930	BA05G09640	Poh0087920	Poh0335820	Poh0122220		Hypnum@jg12214.t1		Entodon@jg11152.t1		Sc_g01094		CepurR40.1G099900		CepurGG1@1G107700.1		Pp3c3_18430				11	scaffold-AWOI-2013909-Diphyscium_foliosum	cluster_1117	ABK3
abk3g01094		BA05G05000			Poh0145080	Poh0351500		Hypnum@jg22435.t1		Entodon@jg5508.t1	Sc_g02190		CepurR40.1G324800	CepurR40.4G237300	CepurGG1@1G317600.1	CepurGG1@4G241700.1	Pp3c3_19310				11	scaffold-AWOI-2005385-Diphyscium_foliosum	cluster_1118	ABK3
abk3g01097	BA02G24920	BA05G04980	Poh0154890	Poh0275740	Poh0145100	Poh0351520	Hypnum@jg9888.t1	Hypnum@jg22440.t1	Entodon@jg13159.t1	Entodon@jg5510.t1	Sc_g02189		CepurR40.1G324600	CepurR40.4G237400	CepurGG1@1G317500.1	CepurGG1@4G241800.1	Pp3c3_19360				16	scaffold-HRWG-2006751-Buxbaumia_aphylla	cluster_1119	ABK3
abk3g01098		BA05G05000			Poh0145080	Poh0351500		Hypnum@jg22435.t1		Entodon@jg5508.t1	Sc_g02190		CepurR40.1G324800	CepurR40.4G237300	CepurGG1@1G317600.1	CepurGG1@4G241700.1	Pp3c3_19310				11	scaffold-AWOI-2005385-Diphyscium_foliosum	cluster_1120	ABK3
abk3g01101		BA05G05000			Poh0145080	Poh0351500		Hypnum@jg22435.t1	Entodon@jg13163.t1	Entodon@jg5508.t1	Sc_g02190		CepurR40.1G324800	CepurR40.4G237300	CepurGG1@1G317600.1	CepurGG1@4G241700.1	Pp3c3_19310				12	scaffold-AWOI-2005385-Diphyscium_foliosum	cluster_1121	ABK3
abk3g01102		BA05G05000			Poh0145080	Poh0351500	Hypnum@jg9895.t1	Hypnum@jg22435.t1	Entodon@jg13163.t1	Entodon@jg5508.t1	Sc_g02190		CepurR40.1G324800	CepurR40.4G237300	CepurGG1@1G317600.1	CepurGG1@4G241700.1	Pp3c3_19310				13	scaffold-AWOI-2005385-Diphyscium_foliosum	cluster_1122	ABK3
abk3g01103		BA05G05000			Poh0145080	Poh0351500		Hypnum@jg22435.t1		Entodon@jg5508.t1	Sc_g02190		CepurR40.1G324800	CepurR40.4G237300	CepurGG1@1G317600.1	CepurGG1@4G241700.1	Pp3c3_19310				11	scaffold-AWOI-2005385-Diphyscium_foliosum	cluster_1123	ABK3
abk3g01104	BA02G24920	BA05G04980	Poh0154890	Poh0275740	Poh0145100	Poh0351520	Hypnum@jg9888.t1	Hypnum@jg22440.t1	Entodon@jg13159.t1	Entodon@jg5510.t1	Sc_g02189		CepurR40.1G324600	CepurR40.4G237400	CepurGG1@1G317500.1	CepurGG1@4G241800.1	Pp3c3_19360				16	scaffold-HRWG-2006751-Buxbaumia_aphylla	cluster_1124	ABK3
abk3g01107		BA05G04970	Poh0154940	Poh0275720	Poh0145110	Poh0351530	Hypnum@jg9884.t1	Hypnum@jg22443.t1	Entodon@jg13164.t1	Entodon@jg5512.t1			CepurR40.1G334400	CepurR40.4G237500	CepurGG1@1G326700.1	CepurGG1@4G241900.1	Pp3c3_19490				14	scaffold-AWOI-2003938-Diphyscium_foliosum	cluster_1125	ABK3
abk3g01109		BA05G04970	Poh0154940	Poh0275720	Poh0145110	Poh0351530	Hypnum@jg9884.t1	Hypnum@jg22443.t1	Entodon@jg13164.t1	Entodon@jg5512.t1			CepurR40.1G334400	CepurR40.4G237500	CepurGG1@1G326700.1	CepurGG1@4G241900.1	Pp3c3_19490				14	scaffold-AWOI-2003938-Diphyscium_foliosum	cluster_1126	ABK3
abk3g01110		BA05G04970	Poh0154940	Poh0275720	Poh0145110	Poh0351530	Hypnum@jg9884.t1	Hypnum@jg22443.t1	Entodon@jg13164.t1	Entodon@jg5512.t1			CepurR40.1G334400	CepurR40.4G237500	CepurGG1@1G326700.1	CepurGG1@4G241900.1	Pp3c3_19490				14	scaffold-AWOI-2003938-Diphyscium_foliosum	cluster_1127	ABK3
abk3g01111		BA05G05100			Poh0145280			Hypnum@jg22450.t1		Entodon@jg5514.t1	Sc_g04414		CepurR40.1G334500	CepurR40.4G238100	CepurGG1@1G326800.1	CepurGG1@4G242600.1	Pp3c3_19510				10	scaffold-AWOI-2064060-Diphyscium_foliosum	cluster_1128	ABK3
abk3g01116		BA05G05100			Poh0145280			Hypnum@jg22450.t1		Entodon@jg5514.t1	Sc_g04414		CepurR40.1G334500	CepurR40.4G238100	CepurGG1@1G326800.1	CepurGG1@4G242600.1	Pp3c3_19510				10	scaffold-AWOI-2064060-Diphyscium_foliosum	cluster_1129	ABK3
abk3g01117					Poh0145290		Hypnum@jg9863.t1	Hypnum@jg22454.t1	Entodon@jg13187.t1	Entodon@jg5515.t1	Sc_g04413	Sc_g01807	CepurR40.1G335000		CepurGG1@1G327300.1	CepurGG1@4G243000.1	Pp3c3_19540				11	#N/A	cluster_1130	ABK3
abk3g01118		BA05G05100			Poh0145280			Hypnum@jg22450.t1		Entodon@jg5514.t1	Sc_g04414		CepurR40.1G334500	CepurR40.4G238100	CepurGG1@1G326800.1	CepurGG1@4G242600.1	Pp3c3_19510				10	scaffold-AWOI-2064060-Diphyscium_foliosum	cluster_1131	ABK3
abk3g01119	BA02G22090		Poh0155190	Poh0275440			Hypnum@jg9862.t1	Hypnum@jg22452.t1	Entodon@jg13188.t1			Sc_g01808	CepurR40.1G334900		CepurGG1@1G327200.1	CepurGG1@4G242900.1	Pp3c3_19530				11	scaffold-AWOI-2014120-Diphyscium_foliosum	cluster_1132	ABK3
abk3g01122	BA02G22090		Poh0155190	Poh0275440			Hypnum@jg9862.t1	Hypnum@jg22452.t1	Entodon@jg13188.t1			Sc_g01808	CepurR40.1G334900		CepurGG1@1G327200.1	CepurGG1@4G242900.1	Pp3c3_19530				11	scaffold-HRWG-2014943-Buxbaumia_aphylla	cluster_1133	ABK3
abk3g01123	BA02G22070		Poh0155180	Poh0275450	Poh0145300	Poh0351320		Hypnum@jg22455.t1	Entodon@jg13185.t1	Entodon@jg5516.t1	Sc_g04412	Sc_g01806	CepurR40.1G335100	CepurR40.4G238600	CepurGG1@1G327500.1	CepurGG1@4G243100.1	Pp3c3_19550	Pp3c4_12430			16	scaffold-AWOI-2073618-Diphyscium_foliosum	cluster_1134	ABK3
abk3g01124	BA02G22090		Poh0155190	Poh0275440			Hypnum@jg9862.t1	Hypnum@jg22452.t1	Entodon@jg13188.t1			Sc_g01808	CepurR40.1G334900		CepurGG1@1G327200.1	CepurGG1@4G242900.1	Pp3c3_19530				11	scaffold-AWOI-2014120-Diphyscium_foliosum	cluster_1135	ABK3
abk3g01125	BA02G22090		Poh0155190	Poh0275440			Hypnum@jg9862.t1	Hypnum@jg22452.t1	Entodon@jg13188.t1			Sc_g01808	CepurR40.1G334900		CepurGG1@1G327200.1	CepurGG1@4G242900.1	Pp3c3_19530				11	scaffold-AWOI-2014120-Diphyscium_foliosum	cluster_1136	ABK3
abk3g01126					Poh0145290	Poh0351340	Hypnum@jg9863.t1	Hypnum@jg22454.t1	Entodon@jg13187.t1	Entodon@jg5515.t1	Sc_g04413	Sc_g01807	CepurR40.1G335000	CepurR40.4G238500	CepurGG1@1G327300.1	CepurGG1@4G243000.1	Pp3c3_19540				13	#N/A	cluster_1137	ABK3
abk3g01127					Poh0145290	Poh0351340	Hypnum@jg9863.t1	Hypnum@jg22454.t1	Entodon@jg13187.t1	Entodon@jg5515.t1	Sc_g04413	Sc_g01807	CepurR40.1G335000	CepurR40.4G238500	CepurGG1@1G327300.1	CepurGG1@4G243000.1	Pp3c3_19540				13	#N/A	cluster_1138	ABK3
abk3g01128					Poh0145290	Poh0351340	Hypnum@jg9863.t1	Hypnum@jg22454.t1	Entodon@jg13187.t1	Entodon@jg5515.t1	Sc_g04413	Sc_g01807	CepurR40.1G335000	CepurR40.4G238500	CepurGG1@1G327300.1	CepurGG1@4G243000.1	Pp3c3_19540				13	#N/A	cluster_1139	ABK3
abk3g01129					Poh0145290	Poh0351340	Hypnum@jg9863.t1	Hypnum@jg22454.t1	Entodon@jg13187.t1	Entodon@jg5515.t1	Sc_g04413	Sc_g01807	CepurR40.1G335000	CepurR40.4G238500	CepurGG1@1G327300.1	CepurGG1@4G243000.1	Pp3c3_19540				13	#N/A	cluster_1140	ABK3
abk3g01130					Poh0145290	Poh0351340	Hypnum@jg9863.t1	Hypnum@jg22454.t1	Entodon@jg13187.t1	Entodon@jg5515.t1	Sc_g04413	Sc_g01807	CepurR40.1G335000	CepurR40.4G238500	CepurGG1@1G327300.1	CepurGG1@4G243000.1	Pp3c3_19540				13	#N/A	cluster_1141	ABK3
abk3g01131					Poh0145290	Poh0351340	Hypnum@jg9863.t1	Hypnum@jg22454.t1	Entodon@jg13187.t1	Entodon@jg5515.t1	Sc_g04413	Sc_g01807	CepurR40.1G335000	CepurR40.4G238500	CepurGG1@1G327300.1	CepurGG1@4G243000.1	Pp3c3_19540				13	#N/A	cluster_1142	ABK3
abk3g01132	BA02G22070		Poh0155180	Poh0275450	Poh0145300	Poh0351320		Hypnum@jg22455.t1	Entodon@jg13185.t1	Entodon@jg5516.t1	Sc_g04412	Sc_g01806	CepurR40.1G335100	CepurR40.4G238600	CepurGG1@1G327500.1	CepurGG1@4G243100.1	Pp3c3_19550	Pp3c4_12430			16	scaffold-AWOI-2073618-Diphyscium_foliosum	cluster_1143	ABK3
abk3g01142	BA02G22080		Poh0155170	Poh0275460			Hypnum@jg9865.t1		Entodon@jg13182.t1			Sc_g01805	CepurR40.1G335400		CepurGG1@1G327900.1		Pp3c3_19590	Pp3c4_12390			10	scaffold-AWOI-2008610-Diphyscium_foliosum	cluster_1144	ABK3
abk3g01150	BA02G22080		Poh0155170	Poh0275460			Hypnum@jg9865.t1		Entodon@jg13182.t1			Sc_g01805	CepurR40.1G335400		CepurGG1@1G327900.1		Pp3c3_19590	Pp3c4_12390			10	scaffold-AWOI-2008610-Diphyscium_foliosum	cluster_1145	ABK3
abk3g01197			Poh0053270	Poh0086000			Hypnum@jg12252.t1		Entodon@jg11109.t1		Sc_g01049	Sc_g04902	CepurR40.1G104600	CepurR40.4G129400	CepurGG1@1G111700.1	CepurGG1@4G130900.1		Pp3c13_16580			11	#N/A	cluster_1146	ABK3
abk3g01198			Poh0053270	Poh0086000			Hypnum@jg12252.t1		Entodon@jg11109.t1		Sc_g01049	Sc_g04902	CepurR40.1G104600	CepurR40.4G129400	CepurGG1@1G111700.1	CepurGG1@4G130900.1		Pp3c13_16580			11	scaffold-HRWG-2068598-Buxbaumia_aphylla	cluster_1147	ABK3
abk3g01199	BA02G08630		Poh0053260	Poh0085990			Hypnum@jg12251.t1		Entodon@jg11110.t1		Sc_g01050	Sc_g04901	CepurR40.1G104800	CepurR40.4G129300	CepurGG1@1G111800.1	CepurGG1@4G130800.1	Pp3c3_20220				12	scaffold-AWOI-2069387-Diphyscium_foliosum	cluster_1148	ABK3
abk3g01200	BA02G08630		Poh0053260	Poh0085990			Hypnum@jg12251.t1		Entodon@jg11110.t1		Sc_g01050	Sc_g04901	CepurR40.1G104800	CepurR40.4G129300	CepurGG1@1G111800.1	CepurGG1@4G130800.1	Pp3c3_20220				12	scaffold-AWOI-2069387-Diphyscium_foliosum	cluster_1149	ABK3
abk3g01201	BA02G08620		Poh0053290	Poh0086020			Hypnum@jg12254.t1		Entodon@jg11107.t1		Sc_g01053	Sc_g04897	CepurR40.1G105300	CepurR40.4G129500	CepurGG1@1G112100.1	CepurGG1@4G131000.1	Pp3c3_20200				12	scaffold-AWOI-2073576-Diphyscium_foliosum	cluster_1150	ABK3
abk3g01202	BA02G08630		Poh0053260	Poh0085990			Hypnum@jg12251.t1		Entodon@jg11110.t1		Sc_g01050	Sc_g04901	CepurR40.1G104800	CepurR40.4G129300	CepurGG1@1G111800.1	CepurGG1@4G130800.1	Pp3c3_20220				12	scaffold-AWOI-2069387-Diphyscium_foliosum	cluster_1151	ABK3
abk3g01204	BA02G08640		Poh0053240	Poh0085980			Hypnum@jg12249.t1		Entodon@jg11112.t1		Sc_g01051	Sc_g04900	CepurR40.1G104900	CepurR40.4G129200	CepurGG1@1G111900.1	CepurGG1@4G130600.1	Pp3c3_20260	Pp3c13_16600			13	scaffold-AWOI-2010412-Diphyscium_foliosum	cluster_1152	ABK3
abk3g01211	BA05G04530		Poh0143730	Poh0352660			Hypnum@jg22314.t1	Hypnum@jg11126.t1	Entodon@jg12169.t1	Entodon@jg5610.t1	Sc_g01869		CepurR40.4G242400	CepurR40.1G239900	CepurGG1@4G246900.1	CepurGG1@1G234800.1	Pp3c3_20420				13	scaffold-AWOI-2011340-Diphyscium_foliosum	cluster_1153	ABK3
abk3g01212	BA05G04530		Poh0143730	Poh0352660			Hypnum@jg22314.t1	Hypnum@jg11126.t1	Entodon@jg12169.t1	Entodon@jg5610.t1	Sc_g01869		CepurR40.4G242400	CepurR40.1G239900	CepurGG1@4G246900.1	CepurGG1@1G234800.1	Pp3c3_20420				13	scaffold-AWOI-2011340-Diphyscium_foliosum	cluster_1154	ABK3
abk3g01213			Poh0143740	Poh0352670				Hypnum@jg11122.t1	Entodon@jg12167.t1				CepurR40.4G242700	CepurR40.1G240200	CepurGG1@4G247100.1	CepurGG1@1G235100.1	Pp3c3_20410	Pp3c13_22190			10	scaffold-HRWG-2006091-Buxbaumia_aphylla	cluster_1155	ABK3
abk3g01216	BA05G04580		Poh0143700	Poh0352640			Hypnum@jg22319.t1		Entodon@jg12170.t1	Entodon@jg5608.t1	Sc_g01867	Sc_g04518	CepurR40.4G242100	CepurR40.1G239500	CepurGG1@4G246300.1	CepurGG1@1G234400.1					12	scaffold-AWOI-2071343-Diphyscium_foliosum	cluster_1156	ABK3
abk3g01217	BA05G04570		Poh0143690	Poh0352630			Hypnum@jg22321.t1			Entodon@jg5607.t1		Sc_g04516	CepurR40.4G241700		CepurGG1@4G246000.1		Pp3c3_20490	Pp3c13_21970			10	scaffold-HRWG-2012633-Buxbaumia_aphylla	cluster_1157	ABK3
abk3g01218	BA05G04530		Poh0143730	Poh0352660			Hypnum@jg22314.t1	Hypnum@jg11126.t1	Entodon@jg12169.t1	Entodon@jg5610.t1	Sc_g01869		CepurR40.4G242400	CepurR40.1G239900	CepurGG1@4G246900.1	CepurGG1@1G234800.1	Pp3c3_20420				13	scaffold-AWOI-2011340-Diphyscium_foliosum	cluster_1158	ABK3
abk3g01219	BA05G04570		Poh0143690	Poh0352630			Hypnum@jg22321.t1			Entodon@jg5607.t1		Sc_g04516	CepurR40.4G241700		CepurGG1@4G246000.1		Pp3c3_20490	Pp3c13_21970			10	scaffold-HRWG-2012633-Buxbaumia_aphylla	cluster_1159	ABK3
abk3g01252	BA05G08650		Poh0227760					Hypnum@jg23616.t1	Entodon@jg4530.t1		Sc_g05174		CepurR40.4G095600	CepurR40.1G098500	CepurGG1@4G096300.1	CepurGG1@1G094100.1	Pp3c3_20960				10	scaffold-AWOI-2072266-Diphyscium_foliosum	cluster_1160	ABK3
abk3g01254	BA05G08620	BA02G09860	Poh0227730				Hypnum@jg12129.t1	Hypnum@jg23609.t1	Entodon@jg4539.t1		Sc_g05180	Sc_g01005	CepurR40.4G095400	CepurR40.1G098100	CepurGG1@4G096000.1	CepurGG1@1G093700.1	Pp3c3_20980				13	scaffold-AWOI-2014053-Diphyscium_foliosum	cluster_1161	ABK3
abk3g01255	BA05G08680		Poh0227790					Hypnum@jg23613.t1	Entodon@jg4534.t1		Sc_g05174		CepurR40.4G096300	CepurR40.1G098600	CepurGG1@4G096700.1	CepurGG1@1G094200.1	Pp3c3_20960				10	scaffold-HRWG-2070085-Buxbaumia_aphylla	cluster_1162	ABK3
abk3g01256	BA05G08620	BA02G09860	Poh0227730				Hypnum@jg12129.t1	Hypnum@jg23609.t1	Entodon@jg4539.t1		Sc_g05180	Sc_g01005	CepurR40.4G095400	CepurR40.1G098100	CepurGG1@4G096000.1	CepurGG1@1G093700.1	Pp3c3_20980				13	scaffold-AWOI-2014053-Diphyscium_foliosum	cluster_1163	ABK3
abk3g01261	BA05G08610	BA02G09910	Poh0227720	Poh0088320			Hypnum@jg12144.t1	Hypnum@jg23607.t1	Entodon@jg4540.t1		Sc_g05200	Sc_g01002	CepurR40.4G094900	CepurR40.1G097300		CepurGG1@1G092900.1	Pp3c3_21060				13	scaffold-HRWG-2007135-Buxbaumia_aphylla	cluster_1164	ABK3
abk3g01266			Poh0335460		Poh0122130	Poh0227260	Hypnum@jg12161.t1					Sc_g01016	CepurR40.4G071600	CepurR40.1G095100	CepurGG1@1G090500.1	CepurGG1@4G072300.1	Pp3c3_21130	Pp3c13_15900			11	scaffold-HRWG-2004266-Buxbaumia_aphylla	cluster_1165	ABK3
abk3g01271					Poh0122040		Hypnum@jg12200.t1	Hypnum@jg23036.t1	Entodon@jg11164.t1	Entodon@jg5004.t1	Sc_g05573	Sc_g01021	CepurR40.4G073500	CepurR40.1G094100	CepurGG1@1G089100.1	CepurGG1@4G074400.1	Pp3c3_21170				12	scaffold-AWOI-2070408-Diphyscium_foliosum	cluster_1166	ABK3
abk3g01272					Poh0122040		Hypnum@jg12200.t1	Hypnum@jg23036.t1	Entodon@jg11164.t1	Entodon@jg5004.t1	Sc_g05573	Sc_g01023	CepurR40.4G073500	CepurR40.1G094100	CepurGG1@1G089100.1	CepurGG1@4G074400.1	Pp3c3_21170				12	scaffold-AWOI-2070408-Diphyscium_foliosum	cluster_1167	ABK3
abk3g01273			Poh0335540	Poh0088060			Hypnum@jg12170.t1	Hypnum@jg23034.t1		Entodon@jg5006.t1	Sc_g05571	Sc_g01028	CepurR40.4G073100	CepurR40.1G094400	CepurGG1@1G089400.1	CepurGG1@4G074100.1	Pp3c3_21160	Pp3c13_15920			13	scaffold-HRWG-2068214-Buxbaumia_aphylla	cluster_1168	ABK3
abk3g01278			Poh0335540	Poh0088060			Hypnum@jg12170.t1	Hypnum@jg23034.t1		Entodon@jg5006.t1	Sc_g05571	Sc_g01028	CepurR40.4G073100	CepurR40.1G094400	CepurGG1@1G089400.1	CepurGG1@4G074100.1	Pp3c3_21160	Pp3c13_15920			13	scaffold-HRWG-2068214-Buxbaumia_aphylla	cluster_1169	ABK3
abk3g01279			Poh0335540	Poh0088060			Hypnum@jg12170.t1	Hypnum@jg23034.t1		Entodon@jg5006.t1	Sc_g05571	Sc_g01028	CepurR40.4G073100	CepurR40.1G094400	CepurGG1@1G089400.1	CepurGG1@4G074100.1	Pp3c3_21160	Pp3c13_15920			13	scaffold-HRWG-2068214-Buxbaumia_aphylla	cluster_1170	ABK3
abk3g01280					Poh0122040		Hypnum@jg12200.t1	Hypnum@jg23036.t1	Entodon@jg11164.t1	Entodon@jg5004.t1	Sc_g05573	Sc_g01021	CepurR40.4G073500	CepurR40.1G094100	CepurGG1@1G089100.1	CepurGG1@4G074400.1	Pp3c3_21170				12	scaffold-AWOI-2070408-Diphyscium_foliosum	cluster_1171	ABK3
abk3g01283	BA02G09000		Poh0335720	Poh0087990			Hypnum@jg12199.t1		Entodon@jg11165.t1			Sc_g01025		CepurR40.1G093900	CepurGG1@1G088900.1		Pp3c3_21240	Pp3c13_15690			10	scaffold-HRWG-2014651-Buxbaumia_aphylla	cluster_1172	ABK3
abk3g01285	BA02G09000		Poh0335720	Poh0087990			Hypnum@jg12199.t1		Entodon@jg11165.t1			Sc_g01025		CepurR40.1G093900	CepurGG1@1G088900.1		Pp3c3_21240	Pp3c13_15690			10	scaffold-HRWG-2014651-Buxbaumia_aphylla	cluster_1173	ABK3
abk3g01288	BA02G09050		Poh0335660	Poh0088150			Hypnum@jg12189.t1		Entodon@jg11172.t1	Entodon@jg4994.t1		Sc_g01032		CepurR40.1G092300	CepurGG1@1G087400.1		Pp3c3_21360				10	#N/A	cluster_1174	ABK3
abk3g01290	BA02G09050		Poh0335660	Poh0088150	Poh0121990	Poh0227040		Hypnum@jg23045.t1		Entodon@jg4993.t1	Sc_g05577	Sc_g01032	CepurR40.4G074300	CepurR40.1G092400	CepurGG1@1G087500.1	CepurGG1@4G074800.1	Pp3c3_21330	Pp3c13_15600			15	scaffold-AWOI-2001159-Diphyscium_foliosum	cluster_1175	ABK3
abk3g01291	BA02G09050		Poh0335660	Poh0088150			Hypnum@jg12189.t1		Entodon@jg11172.t1	Entodon@jg4994.t1		Sc_g01032		CepurR40.1G092300	CepurGG1@1G087400.1		Pp3c3_21360				10	#N/A	cluster_1176	ABK3
abk3g01296	BA02G09060		Poh0335650	Poh0088140	Poh0121980	Poh0227030	Hypnum@jg12186.t1		Entodon@jg11174.t1		Sc_g05578	Sc_g01033	CepurR40.4G074400	CepurR40.1G092200	CepurGG1@1G087300.1	CepurGG1@4G074900.1	Pp3c3_21440	Pp3c13_15520			15	scaffold-HRWG-2013987-Buxbaumia_aphylla	cluster_1177	ABK3
abk3g01299	BA02G09250		Poh0335630	Poh0088120	Poh0121910	Poh0227010		Hypnum@jg23047.t1	Entodon@jg11177.t1	Entodon@jg4991.t1	Sc_g05586		CepurR40.4G074800			CepurGG1@4G075200.1	Pp3c3_21500				12	scaffold-AWOI-2000368-Diphyscium_foliosum	cluster_1178	ABK3
abk3g01300	BA02G09250		Poh0335630	Poh0088120	Poh0121910	Poh0227010		Hypnum@jg23047.t1	Entodon@jg11177.t1	Entodon@jg4991.t1	Sc_g05586		CepurR40.4G074800			CepurGG1@4G075200.1	Pp3c3_21500				12	scaffold-AWOI-2000368-Diphyscium_foliosum	cluster_1179	ABK3
abk3g01301	BA02G09250		Poh0335630	Poh0088120	Poh0121910	Poh0227010		Hypnum@jg23047.t1	Entodon@jg11177.t1	Entodon@jg4991.t1	Sc_g05586		CepurR40.4G074800			CepurGG1@4G075200.1	Pp3c3_21500				12	scaffold-AWOI-2000368-Diphyscium_foliosum	cluster_1180	ABK3
abk3g01302			Poh0335640	Poh0088130	Poh0121970	Poh0227020	Hypnum@jg12181.t1		Entodon@jg11176.t1		Sc_g05580		CepurR40.4G074700			CepurGG1@4G075100.1	Pp3c3_21490	Pp3c13_15480			11	scaffold-AWOI-2010362-Diphyscium_foliosum	cluster_1181	ABK3
abk3g01304			Poh0335640	Poh0088130	Poh0121970	Poh0227020	Hypnum@jg12181.t1		Entodon@jg11176.t1		Sc_g05580		CepurR40.4G074700			CepurGG1@4G075100.1	Pp3c3_21490	Pp3c13_15480			11	scaffold-AWOI-2010362-Diphyscium_foliosum	cluster_1182	ABK3
abk3g01306			Poh0335640	Poh0088130	Poh0121970	Poh0227020	Hypnum@jg12181.t1		Entodon@jg11176.t1		Sc_g05580		CepurR40.4G074700			CepurGG1@4G075100.1	Pp3c3_21490	Pp3c13_15480			11	scaffold-AWOI-2010362-Diphyscium_foliosum	cluster_1183	ABK3
abk3g01307	BA02G09250		Poh0335630	Poh0088120	Poh0121910	Poh0227010		Hypnum@jg23047.t1	Entodon@jg11177.t1	Entodon@jg4991.t1	Sc_g05586		CepurR40.4G074800			CepurGG1@4G075200.1	Pp3c3_21500				12	scaffold-AWOI-2000368-Diphyscium_foliosum	cluster_1184	ABK3
abk3g01309	BA02G09250		Poh0335630	Poh0088120	Poh0121910	Poh0227010		Hypnum@jg23047.t1	Entodon@jg11177.t1	Entodon@jg4991.t1	Sc_g05586		CepurR40.4G074800			CepurGG1@4G075200.1	Pp3c3_21500				12	scaffold-AWOI-2000368-Diphyscium_foliosum	cluster_1185	ABK3
abk3g01311	BA02G09250		Poh0335630	Poh0088120	Poh0121910	Poh0227010		Hypnum@jg23047.t1	Entodon@jg11177.t1	Entodon@jg4991.t1	Sc_g05586		CepurR40.4G074800			CepurGG1@4G075200.1	Pp3c3_21500				12	scaffold-AWOI-2000368-Diphyscium_foliosum	cluster_1186	ABK3
abk3g01342	BA05G10220		Poh0120910	Poh0148540			Hypnum@jg22740.t1		Entodon@jg5095.t1		Sc_g05089	Sc_g01475	CepurR40.4G105000		CepurGG1@4G103400.1		Pp3c3_21950				10	scaffold-AWOI-2072461-Diphyscium_foliosum	cluster_1187	ABK3
abk3g01345	BA05G10140		Poh0120960	Poh0148600			Hypnum@jg22749.t1		Entodon@jg5102.t1		Sc_g05106	Sc_g01465	CepurR40.4G104300	CepurR40.1G270400	CepurGG1@4G102600.1	CepurGG1@1G262800.1					11	scaffold-AWOI-2008501-Diphyscium_foliosum	cluster_1188	ABK3
abk3g01348	BA05G10170		Poh0120940	Poh0148590			Hypnum@jg22746.t1				Sc_g05105		CepurR40.4G104500	CepurR40.1G270500	CepurGG1@4G102700.1	CepurGG1@1G262900.1	Pp3c3_21970				10	scaffold-AWOI-2073313-Diphyscium_foliosum	cluster_1189	ABK3
abk3g01349	BA05G10140		Poh0120960	Poh0148600			Hypnum@jg22749.t1		Entodon@jg5102.t1		Sc_g05106	Sc_g01465	CepurR40.4G104300	CepurR40.1G270400	CepurGG1@4G102600.1	CepurGG1@1G262800.1					11	scaffold-AWOI-2008501-Diphyscium_foliosum	cluster_1190	ABK3
abk3g01351	BA05G10140		Poh0120960	Poh0148600			Hypnum@jg22749.t1		Entodon@jg5102.t1		Sc_g05106	Sc_g01465	CepurR40.4G104300	CepurR40.1G270400	CepurGG1@4G102600.1	CepurGG1@1G262800.1					11	scaffold-AWOI-2008501-Diphyscium_foliosum	cluster_1191	ABK3
abk3g01360	BA05G10090		Poh0121020	Poh0148640			Hypnum@jg22723.t1		Entodon@jg5079.t1			Sc_g01461	CepurR40.4G103800	CepurR40.1G269900	CepurGG1@4G102100.1	CepurGG1@1G262300.1	Pp3c3_22020				11	scaffold-AWOI-2070523-Diphyscium_foliosum	cluster_1192	ABK3
abk3g01362	BA05G10040		Poh0121030	Poh0148660			Hypnum@jg22718.t1				Sc_g05104	Sc_g01460	CepurR40.4G103600	CepurR40.1G269800	CepurGG1@4G101900.1	CepurGG1@1G262200.1					10	scaffold-HRWG-2070409-Buxbaumia_aphylla	cluster_1193	ABK3
abk3g01363	BA05G10040		Poh0121030	Poh0148660			Hypnum@jg22718.t1				Sc_g05104	Sc_g01460	CepurR40.4G103600	CepurR40.1G269800	CepurGG1@4G101900.1	CepurGG1@1G262200.1					10	scaffold-HRWG-2070409-Buxbaumia_aphylla	cluster_1194	ABK3
abk3g01365	BA05G10090		Poh0121020	Poh0148640			Hypnum@jg22723.t1		Entodon@jg5079.t1			Sc_g01461	CepurR40.4G103800	CepurR40.1G269900	CepurGG1@4G102100.1	CepurGG1@1G262300.1	Pp3c3_22020				11	scaffold-AWOI-2070523-Diphyscium_foliosum	cluster_1195	ABK3
abk3g01366	BA05G10090		Poh0121020	Poh0148640			Hypnum@jg22723.t1		Entodon@jg5079.t1			Sc_g01461	CepurR40.4G103800	CepurR40.1G269900	CepurGG1@4G102100.1	CepurGG1@1G262300.1	Pp3c3_22020				11	scaffold-AWOI-2070523-Diphyscium_foliosum	cluster_1196	ABK3
abk3g01436	BA05G09270		Poh0228240	Poh0123020			Hypnum@jg23093.t1	Hypnum@jg11546.t1	Entodon@jg4959.t1	Entodon@jg11661.t1	Sc_g05212	Sc_g01273	CepurR40.4G078500	CepurR40.1G160900	CepurGG1@4G078600.1	CepurGG1@1G156800.1		Pp3c10_13280			14	scaffold-AWOI-2003517-Diphyscium_foliosum	cluster_1197	ABK3
abk3g01439	BA05G09300		Poh0228160	Poh0122980			Hypnum@jg23099.t1	Hypnum@jg11547.t1	Entodon@jg4956.t1		Sc_g05211	Sc_g01274	CepurR40.4G078600	CepurR40.1G160700	CepurGG1@4G078700.1	CepurGG1@1G156700.1	Pp3c3_22810	Pp3c10_13270			14	scaffold-AWOI-2070576-Diphyscium_foliosum	cluster_1198	ABK3
abk3g01443	BA05G09270		Poh0228240	Poh0123020			Hypnum@jg23093.t1	Hypnum@jg11546.t1	Entodon@jg4959.t1	Entodon@jg11661.t1	Sc_g05212	Sc_g01273	CepurR40.4G078500	CepurR40.1G160900	CepurGG1@4G078600.1	CepurGG1@1G156800.1		Pp3c10_13280			14	scaffold-AWOI-2003517-Diphyscium_foliosum	cluster_1199	ABK3
abk3g01449	BA05G09300	BA02G10260	Poh0228160	Poh0122980	Poh0053630	Poh0086380	Hypnum@jg23099.t1	Hypnum@jg11547.t1	Entodon@jg4956.t1	Entodon@jg11667.t1	Sc_g05211	Sc_g01274	CepurR40.4G078600	CepurR40.1G160700	CepurGG1@4G078700.1	CepurGG1@1G156700.1	Pp3c3_22810	Pp3c10_13270			18	scaffold-AWOI-2070576-Diphyscium_foliosum	cluster_1200	ABK3
abk3g01451	BA05G09300	BA02G10260	Poh0228160	Poh0122980	Poh0053630	Poh0086380	Hypnum@jg23099.t1	Hypnum@jg11547.t1	Entodon@jg4956.t1	Entodon@jg11667.t1	Sc_g05211	Sc_g01274	CepurR40.4G078600	CepurR40.1G160700	CepurGG1@4G078700.1	CepurGG1@1G156700.1	Pp3c3_22810	Pp3c10_13270			18	scaffold-AWOI-2070576-Diphyscium_foliosum	cluster_1201	ABK3
abk3g01452	BA05G09300	BA02G10260	Poh0228160	Poh0122980	Poh0053630	Poh0086380	Hypnum@jg23099.t1	Hypnum@jg11547.t1	Entodon@jg4956.t1	Entodon@jg11667.t1	Sc_g05211	Sc_g01274	CepurR40.4G078600	CepurR40.1G160700	CepurGG1@4G078700.1	CepurGG1@1G156700.1	Pp3c3_22810	Pp3c10_13270			18	scaffold-AWOI-2070576-Diphyscium_foliosum	cluster_1202	ABK3
abk3g01453	BA05G09300	BA02G10260	Poh0228160	Poh0122980	Poh0053630	Poh0086380	Hypnum@jg23099.t1	Hypnum@jg11547.t1	Entodon@jg4956.t1	Entodon@jg11667.t1	Sc_g05211	Sc_g01274	CepurR40.4G078600	CepurR40.1G160700	CepurGG1@4G078700.1	CepurGG1@1G156700.1	Pp3c3_22810	Pp3c10_13270			18	scaffold-AWOI-2070576-Diphyscium_foliosum	cluster_1203	ABK3
abk3g01456	BA05G09330	BA02G10280	Poh0228060	Poh0122880	Poh0053610	Poh0086360	Hypnum@jg23102.t1	Hypnum@jg11551.t1	Entodon@jg4952.t1	Entodon@jg11671.t1	Sc_g05209	Sc_g01276	CepurR40.4G079700	CepurR40.1G160500		CepurGG1@1G156500.1	Pp3c3_22870				16	scaffold-HRWG-2009211-Buxbaumia_aphylla	cluster_1204	ABK3
abk3g01457	BA05G09330	BA02G10280	Poh0228060	Poh0122880	Poh0053610	Poh0086360	Hypnum@jg23102.t1	Hypnum@jg11551.t1	Entodon@jg4952.t1	Entodon@jg11671.t1	Sc_g05209	Sc_g01276	CepurR40.4G079700	CepurR40.1G160500		CepurGG1@1G156500.1	Pp3c3_22870				16	scaffold-HRWG-2009211-Buxbaumia_aphylla	cluster_1205	ABK3
abk3g01458	BA05G09330	BA02G10280	Poh0228060	Poh0122880	Poh0053610	Poh0086360	Hypnum@jg23102.t1	Hypnum@jg11551.t1	Entodon@jg4952.t1	Entodon@jg11671.t1	Sc_g05209	Sc_g01276	CepurR40.4G079700	CepurR40.1G160500		CepurGG1@1G156500.1	Pp3c3_22870				16	scaffold-HRWG-2009211-Buxbaumia_aphylla	cluster_1206	ABK3
abk3g01462	BA05G09330	BA02G10280	Poh0228060	Poh0122880	Poh0053610	Poh0086360	Hypnum@jg23102.t1	Hypnum@jg11551.t1	Entodon@jg4952.t1	Entodon@jg11671.t1	Sc_g05209	Sc_g01276	CepurR40.4G079700	CepurR40.1G160500		CepurGG1@1G156500.1	Pp3c3_22870				16	scaffold-HRWG-2009211-Buxbaumia_aphylla	cluster_1207	ABK3
abk3g01465	BA05G09370		Poh0228030	Poh0122850			Hypnum@jg23105.t1		Entodon@jg4948.t1		Sc_g05222	Sc_g01278	CepurR40.4G079000	CepurR40.1G160300	CepurGG1@4G079000.1	CepurGG1@1G156300.1	Pp3c3_22930	Pp3c10_13240			13	scaffold-HRWG-2070323-Buxbaumia_aphylla	cluster_1208	ABK3
abk3g01466	BA05G09380		Poh0228020	Poh0122840							Sc_g05223	Sc_g01279	CepurR40.4G078800	CepurR40.1G160100	CepurGG1@4G078900.1	CepurGG1@1G156100.1	Pp3c3_22990	Pp3c10_13170			11	scaffold-AWOI-2073203-Diphyscium_foliosum	cluster_1209	ABK3
abk3g01484		BA02G10110			Poh0053410	Poh0086150		Hypnum@jg11524.t1	Entodon@jg11749.t1		Sc_g05503		CepurR40.4G106700	CepurR40.1G120700	CepurGG1@4G105200.1	CepurGG1@1G115100.1	Pp3c3_23290				11	scaffold-HRWG-2003910-Buxbaumia_aphylla	cluster_1210	ABK3
abk3g01487		BA02G10100			Poh0053420	Poh0086160		Hypnum@jg11526.t1	Entodon@jg11748.t1		Sc_g05506		CepurR40.4G107100		CepurGG1@4G105500.1		Pp3c3_23320	Pp3c10_12220			10	scaffold-AWOI-2068286-Diphyscium_foliosum	cluster_1211	ABK3
abk3g01488		BA02G10100			Poh0053420	Poh0086160		Hypnum@jg11526.t1	Entodon@jg11748.t1		Sc_g05506		CepurR40.4G107100		CepurGG1@4G105500.1		Pp3c3_23320	Pp3c10_12220			10	scaffold-AWOI-2068286-Diphyscium_foliosum	cluster_1212	ABK3
abk3g01527	BA02G10460		Poh0144510	Poh0334610	Poh0089100		Hypnum@jg22130.t1	Hypnum@jg11117.t1	Entodon@jg5825.t1	Entodon@jg12159.t1	Sc_g01855	Sc_g04976	CepurR40.4G162900	CepurR40.1G240900	CepurGG1@4G163700.1	CepurGG1@1G235800.1	Pp3c3_23720	Pp3c4_15290	Pp3c12_9190	Pp3c13_19780	18	scaffold-AWOI-2001382-Diphyscium_foliosum	cluster_1213	ABK3
abk3g01528	BA02G10460		Poh0144510	Poh0334610	Poh0089100		Hypnum@jg22130.t1	Hypnum@jg11117.t1	Entodon@jg5825.t1	Entodon@jg12159.t1	Sc_g01855	Sc_g04976	CepurR40.4G162900	CepurR40.1G240900	CepurGG1@4G163700.1	CepurGG1@1G235800.1	Pp3c3_23720	Pp3c4_15290	Pp3c12_9190	Pp3c13_19780	18	scaffold-HRWG-2010796-Buxbaumia_aphylla	cluster_1214	ABK3
abk3g01529	BA02G10460		Poh0144510	Poh0334610	Poh0089100		Hypnum@jg22130.t1	Hypnum@jg11117.t1	Entodon@jg5825.t1	Entodon@jg12159.t1	Sc_g01855	Sc_g04976	CepurR40.4G162900	CepurR40.1G240900	CepurGG1@4G163700.1	CepurGG1@1G235800.1	Pp3c3_23720	Pp3c4_15290	Pp3c12_9190	Pp3c13_19780	18	scaffold-HRWG-2000439-Buxbaumia_aphylla	cluster_1215	ABK3
abk3g01530			Poh0144520			Poh0352170	Hypnum@jg22131.t1		Entodon@jg5826.t1		Sc_g01856	Sc_g04978	CepurR40.4G163300	CepurR40.1G241100	CepurGG1@4G164000.1	CepurGG1@1G235900.1	Pp3c3_23700	Pp3c4_15250	Pp3c12_9180	Pp3c13_19770	14	scaffold-HRWG-2008829-Buxbaumia_aphylla	cluster_1216	ABK3
abk3g01534			Poh0144520			Poh0352170	Hypnum@jg22131.t1		Entodon@jg5826.t1		Sc_g01856	Sc_g04978	CepurR40.4G163300	CepurR40.1G241100	CepurGG1@4G164000.1	CepurGG1@1G235900.1	Pp3c3_23700	Pp3c4_15250	Pp3c12_9180	Pp3c13_19770	14	scaffold-HRWG-2008829-Buxbaumia_aphylla	cluster_1217	ABK3
abk3g01536			Poh0144520			Poh0352170	Hypnum@jg22131.t1		Entodon@jg5826.t1		Sc_g01856	Sc_g04978	CepurR40.4G163300	CepurR40.1G241100	CepurGG1@4G164000.1	CepurGG1@1G235900.1	Pp3c3_23700	Pp3c4_15250	Pp3c12_9180	Pp3c13_19770	14	scaffold-HRWG-2008829-Buxbaumia_aphylla	cluster_1218	ABK3
abk3g01537			Poh0144520			Poh0352170	Hypnum@jg22131.t1		Entodon@jg5826.t1		Sc_g01856	Sc_g04978	CepurR40.4G163300	CepurR40.1G241100	CepurGG1@4G164000.1	CepurGG1@1G235900.1	Pp3c3_23700	Pp3c4_15250	Pp3c12_9180	Pp3c13_19770	14	scaffold-HRWG-2008829-Buxbaumia_aphylla	cluster_1219	ABK3
abk3g01538	BA02G10460		Poh0144510	Poh0334610	Poh0089100		Hypnum@jg22130.t1	Hypnum@jg11117.t1	Entodon@jg5827.t1	Entodon@jg12159.t1	Sc_g01855	Sc_g04976	CepurR40.4G162900	CepurR40.1G240900	CepurGG1@4G163700.1	CepurGG1@1G235800.1	Pp3c3_23720	Pp3c4_15290	Pp3c12_9190	Pp3c13_19780	18	scaffold-AWOI-2001382-Diphyscium_foliosum	cluster_1220	ABK3
abk3g01542	BA02G10430		Poh0144450	Poh0334520	Poh0089170	Poh0352270		Hypnum@jg11111.t1		Entodon@jg12153.t1		Sc_g04972	CepurR40.4G162500		CepurGG1@4G163300.1			Pp3c4_15310	Pp3c12_9200	Pp3c13_19830	13	scaffold-AWOI-2005955-Diphyscium_foliosum	cluster_1221	ABK3
abk3g01545	BA02G10420		Poh0144460	Poh0334550	Poh0089160	Poh0352260	Hypnum@jg22138.t1	Hypnum@jg11110.t1	Entodon@jg5835.t1	Entodon@jg12153.t1		Sc_g04973	CepurR40.4G162400	CepurR40.1G241600	CepurGG1@4G163100.1	CepurGG1@1G236400.1	Pp3c3_23790	Pp3c4_15350	Pp3c12_9240		17	scaffold-AWOI-2073941-Diphyscium_foliosum	cluster_1222	ABK3
abk3g01546	BA02G10460		Poh0144510	Poh0334610	Poh0089100		Hypnum@jg22130.t1	Hypnum@jg11117.t1	Entodon@jg5827.t1	Entodon@jg12159.t1	Sc_g01855	Sc_g04976	CepurR40.4G162900	CepurR40.1G240900	CepurGG1@4G163700.1	CepurGG1@1G235800.1	Pp3c3_23720	Pp3c4_15290	Pp3c12_9190	Pp3c13_19780	18	scaffold-HRWG-2010796-Buxbaumia_aphylla	cluster_1223	ABK3
abk3g01547	BA02G10420		Poh0144460	Poh0334550	Poh0089160	Poh0352260	Hypnum@jg22138.t1	Hypnum@jg11110.t1	Entodon@jg5835.t1	Entodon@jg12153.t1		Sc_g04973	CepurR40.4G162400	CepurR40.1G241600	CepurGG1@4G163100.1	CepurGG1@1G236400.1	Pp3c3_23790	Pp3c4_15350	Pp3c12_9240		17	scaffold-AWOI-2073941-Diphyscium_foliosum	cluster_1224	ABK3
abk3g01548	BA02G10460		Poh0144510	Poh0334610	Poh0089100		Hypnum@jg22130.t1	Hypnum@jg11117.t1	Entodon@jg5827.t1	Entodon@jg12159.t1	Sc_g01855	Sc_g04976	CepurR40.4G162900	CepurR40.1G240900	CepurGG1@4G163700.1	CepurGG1@1G235800.1	Pp3c3_23720	Pp3c4_15290	Pp3c12_9190	Pp3c13_19780	18	scaffold-AWOI-2001382-Diphyscium_foliosum	cluster_1225	ABK3
abk3g01550	BA02G10420		Poh0144460	Poh0334550	Poh0089160	Poh0352260	Hypnum@jg22138.t1	Hypnum@jg11110.t1	Entodon@jg5835.t1	Entodon@jg12153.t1		Sc_g04973	CepurR40.4G162400	CepurR40.1G241600	CepurGG1@4G163100.1	CepurGG1@1G236400.1	Pp3c3_23790	Pp3c4_15350	Pp3c12_9240		17	scaffold-AWOI-2073941-Diphyscium_foliosum	cluster_1226	ABK3
abk3g01572	BA02G25390		Poh0343780	Poh0153950			Hypnum@jg10550.t1		Entodon@jg12585.t1		Sc_g04431		CepurR40.1G299800		CepurGG1@1G292600.1	CepurGG1@4G144700.1			Pp3c4_20550		10	scaffold-HRWG-2069930-Buxbaumia_aphylla	cluster_1227	ABK3
abk3g01573	BA02G25390		Poh0343780	Poh0153950			Hypnum@jg10550.t1		Entodon@jg12585.t1		Sc_g04431		CepurR40.1G299800		CepurGG1@1G292300.1	CepurGG1@4G144700.1			Pp3c4_20550		10	scaffold-HRWG-2069930-Buxbaumia_aphylla	cluster_1228	ABK3
abk3g01574	BA02G25400	BA05G07300	Poh0343760	Poh0153960			Hypnum@jg10544.t1		Entodon@jg12588.t1		Sc_g04432		CepurR40.1G299700	CepurR40.4G143400	CepurGG1@1G292200.1	CepurGG1@4G144800.1	Pp3c3_24080	Pp3c10_20750	Pp3c4_20560		14	scaffold-AWOI-2003867-Diphyscium_foliosum	cluster_1229	ABK3
abk3g01579	BA02G25430	BA05G07390	Poh0343740	Poh0153980			Hypnum@jg10541.t1		Entodon@jg12592.t1		Sc_g04417			CepurR40.4G143800		CepurGG1@4G145200.1	Pp3c3_24110	Pp3c10_20740	Pp3c4_20580		12	scaffold-HRWG-2005869-Buxbaumia_aphylla	cluster_1230	ABK3
abk3g01580	BA02G25430	BA05G07290	Poh0343740	Poh0153980			Hypnum@jg10541.t1		Entodon@jg12592.t1		Sc_g04417			CepurR40.4G143800		CepurGG1@4G145200.1	Pp3c3_24110	Pp3c10_20740	Pp3c4_20580		12	scaffold-HRWG-2005869-Buxbaumia_aphylla	cluster_1231	ABK3
abk3g01581	BA02G25430	BA05G07290	Poh0343740	Poh0153980			Hypnum@jg10541.t1		Entodon@jg12592.t1		Sc_g04417			CepurR40.4G143800		CepurGG1@4G145200.1	Pp3c3_24110	Pp3c10_20740	Pp3c4_20580		12	scaffold-HRWG-2005869-Buxbaumia_aphylla	cluster_1232	ABK3
abk3g01582	BA02G25400	BA05G07300	Poh0343760	Poh0153960			Hypnum@jg10544.t1		Entodon@jg12588.t1		Sc_g04432		CepurR40.1G299700	CepurR40.4G143400	CepurGG1@1G292200.1	CepurGG1@4G144800.1	Pp3c3_24080	Pp3c10_20750	Pp3c4_20560		14	scaffold-AWOI-2003867-Diphyscium_foliosum	cluster_1233	ABK3
abk3g01592	BA02G25400	BA05G07300	Poh0343760	Poh0153960			Hypnum@jg10544.t1		Entodon@jg12588.t1					CepurR40.4G143400		CepurGG1@4G144800.1	Pp3c3_24080	Pp3c10_20750			10	scaffold-AWOI-2003867-Diphyscium_foliosum	cluster_1234	ABK3
abk3g01593	BA02G25400	BA05G07300	Poh0343760	Poh0153960			Hypnum@jg10544.t1		Entodon@jg12588.t1					CepurR40.4G143400		CepurGG1@4G144800.1	Pp3c3_24080	Pp3c10_20750			10	scaffold-AWOI-2003867-Diphyscium_foliosum	cluster_1235	ABK3
abk3g01594	BA02G25400	BA05G07300	Poh0343760	Poh0153960			Hypnum@jg10544.t1		Entodon@jg12588.t1		Sc_g04432			CepurR40.4G143400		CepurGG1@4G144800.1	Pp3c3_24080	Pp3c10_20750			11	scaffold-AWOI-2003867-Diphyscium_foliosum	cluster_1236	ABK3
abk3g01595	BA02G25440		Poh0343730	Poh0153990			Hypnum@jg10539.t1		Entodon@jg12594.t1		Sc_g04418			CepurR40.4G143600		CepurGG1@4G145000.1	Pp3c3_24130	Pp3c10_20720			10	scaffold-HRWG-2011917-Buxbaumia_aphylla	cluster_1237	ABK3
abk3g01596	BA02G25400	BA05G07300	Poh0343760	Poh0153960			Hypnum@jg10544.t1		Entodon@jg12588.t1		Sc_g04432			CepurR40.4G143400		CepurGG1@4G144800.1	Pp3c3_24080	Pp3c10_20750			11	scaffold-AWOI-2003867-Diphyscium_foliosum	cluster_1238	ABK3
abk3g01597	BA02G25400	BA05G07300	Poh0343760	Poh0153960			Hypnum@jg10544.t1		Entodon@jg12588.t1		Sc_g04432			CepurR40.4G143400		CepurGG1@4G144800.1	Pp3c3_24080	Pp3c10_20750			11	scaffold-AWOI-2003867-Diphyscium_foliosum	cluster_1239	ABK3
abk3g01598	BA02G25440		Poh0343730	Poh0153990			Hypnum@jg10539.t1		Entodon@jg12594.t1		Sc_g04418		CepurR40.1G299500	CepurR40.4G143600	CepurGG1@1G291700.1	CepurGG1@4G145000.1	Pp3c3_24130	Pp3c10_20720			12	scaffold-HRWG-2011917-Buxbaumia_aphylla	cluster_1240	ABK3
abk3g01599	BA02G25440		Poh0343730	Poh0153990			Hypnum@jg10539.t1		Entodon@jg12594.t1		Sc_g04418		CepurR40.1G299500	CepurR40.4G143600	CepurGG1@1G291700.1	CepurGG1@4G145000.1	Pp3c3_24130	Pp3c10_20720			12	scaffold-HRWG-2011917-Buxbaumia_aphylla	cluster_1241	ABK3
abk3g01600	BA02G25430	BA05G07290	Poh0343740	Poh0153980			Hypnum@jg10541.t1	Hypnum@jg22878.t1	Entodon@jg12592.t1	Entodon@jg5275.t1	Sc_g04433	Sc_g04652		CepurR40.4G143500		CepurGG1@4G145200.1	Pp3c3_24110	Pp3c10_20740			14	scaffold-HRWG-2005869-Buxbaumia_aphylla	cluster_1242	ABK3
abk3g01602	BA02G25430	BA05G07390	Poh0343740	Poh0153980			Hypnum@jg10541.t1	Hypnum@jg22878.t1	Entodon@jg12592.t1	Entodon@jg5275.t1	Sc_g04417	Sc_g04652		CepurR40.4G143800		CepurGG1@4G144900.1	Pp3c3_24110	Pp3c10_20740			14	scaffold-HRWG-2005869-Buxbaumia_aphylla	cluster_1243	ABK3
abk3g01603	BA02G25430	BA05G07390	Poh0343740	Poh0153980			Hypnum@jg10541.t1	Hypnum@jg22878.t1	Entodon@jg12592.t1	Entodon@jg5275.t1	Sc_g04417	Sc_g04652		CepurR40.4G143500		CepurGG1@4G145200.1	Pp3c3_24110	Pp3c10_20740			14	scaffold-HRWG-2005869-Buxbaumia_aphylla	cluster_1244	ABK3
abk3g01604	BA02G25430	BA05G07390	Poh0343740	Poh0153980			Hypnum@jg10541.t1	Hypnum@jg22878.t1	Entodon@jg12592.t1	Entodon@jg5275.t1	Sc_g04417	Sc_g04652		CepurR40.4G143800		CepurGG1@4G144900.1	Pp3c3_24110	Pp3c10_20740			14	scaffold-HRWG-2005869-Buxbaumia_aphylla	cluster_1245	ABK3
abk3g01605	BA02G25430	BA05G07390	Poh0343740	Poh0153980			Hypnum@jg10541.t1	Hypnum@jg22878.t1	Entodon@jg12592.t1	Entodon@jg5275.t1	Sc_g04417	Sc_g04652		CepurR40.4G143800		CepurGG1@4G144900.1	Pp3c3_24110	Pp3c10_20740			14	scaffold-HRWG-2005869-Buxbaumia_aphylla	cluster_1246	ABK3
abk3g01606	BA02G25440		Poh0343730	Poh0153990			Hypnum@jg10539.t1		Entodon@jg12594.t1		Sc_g04418		CepurR40.1G299500	CepurR40.4G143600	CepurGG1@1G291700.1	CepurGG1@4G145000.1	Pp3c3_24130	Pp3c10_20720			12	scaffold-HRWG-2011917-Buxbaumia_aphylla	cluster_1247	ABK3
abk3g01614	BA02G25450	BA05G07420	Poh0343720	Poh0154000	Poh0119290	Poh0146620	Hypnum@jg10538.t1	Hypnum@jg22874.t1	Entodon@jg12595.t1	Entodon@jg5281.t1	Sc_g02247	Sc_g04662	CepurR40.1G299400	CepurR40.4G144200	CepurGG1@1G291600.1	CepurGG1@4G145600.1	Pp3c3_24230	Pp3c10_20710			18	scaffold-AWOI-2070408-Diphyscium_foliosum	cluster_1248	ABK3
abk3g01619	BA02G25450	BA05G07420	Poh0343720	Poh0154000	Poh0119290	Poh0146620	Hypnum@jg10538.t1	Hypnum@jg22874.t1	Entodon@jg12595.t1	Entodon@jg5281.t1	Sc_g02247	Sc_g04662	CepurR40.1G299400	CepurR40.4G144200	CepurGG1@1G291600.1	CepurGG1@4G145600.1	Pp3c3_24230	Pp3c10_20710			18	scaffold-AWOI-2070408-Diphyscium_foliosum	cluster_1249	ABK3
abk3g01620	BA02G25450	BA05G07420	Poh0343720	Poh0154000	Poh0119290	Poh0146620	Hypnum@jg10538.t1	Hypnum@jg22874.t1	Entodon@jg12595.t1	Entodon@jg5281.t1	Sc_g02247	Sc_g04662	CepurR40.1G299400	CepurR40.4G144200	CepurGG1@1G291600.1	CepurGG1@4G145600.1	Pp3c3_24230	Pp3c10_20710			18	scaffold-AWOI-2070408-Diphyscium_foliosum	cluster_1250	ABK3
abk3g01621		BA05G07460			Poh0119360	Poh0146680		Hypnum@jg22870.t1		Entodon@jg5285.t1		Sc_g04658		CepurR40.4G144400		CepurGG1@4G145800.1	Pp3c3_24240	Pp3c10_20682			10	scaffold-HRWG-2013705-Buxbaumia_aphylla	cluster_1251	ABK3
abk3g01623		BA05G07460			Poh0119360	Poh0146680		Hypnum@jg22870.t1		Entodon@jg5285.t1		Sc_g04658		CepurR40.4G144400		CepurGG1@4G145800.1	Pp3c3_24240	Pp3c10_20682			10	scaffold-AWOI-2072546-Diphyscium_foliosum	cluster_1252	ABK3
abk3g01624		BA05G07460			Poh0119360	Poh0146680		Hypnum@jg22870.t1		Entodon@jg5285.t1		Sc_g04658		CepurR40.4G144400		CepurGG1@4G145800.1	Pp3c3_24240	Pp3c10_20682			10	scaffold-AWOI-2072546-Diphyscium_foliosum	cluster_1253	ABK3
abk3g01631	BA02G25780		Poh0343690	Poh0154030			Hypnum@jg10524.t1		Entodon@jg12605.t1		Sc_g02253		CepurR40.1G298100		CepurGG1@1G289700.1		Pp3c3_24390	Pp3c10_20450			10	scaffold-HRWG-2070099-Buxbaumia_aphylla	cluster_1254	ABK3
abk3g01638	BA02G25760		Poh0343650	Poh0154060			Hypnum@jg10521.t1		Entodon@jg12609.t1		Sc_g02255		CepurR40.1G297900		CepurGG1@1G289500.1		Pp3c3_24520	Pp3c10_20360			10	scaffold-AWOI-2010725-Diphyscium_foliosum	cluster_1255	ABK3
abk3g01639	BA02G25760		Poh0343650	Poh0154060			Hypnum@jg10521.t1		Entodon@jg12609.t1		Sc_g02255		CepurR40.1G297900		CepurGG1@1G289500.1		Pp3c3_24520	Pp3c10_20360			10	scaffold-AWOI-2010725-Diphyscium_foliosum	cluster_1256	ABK3
abk3g01640	BA02G25760		Poh0343660	Poh0154060			Hypnum@jg10521.t1		Entodon@jg12609.t1		Sc_g02255		CepurR40.1G297900		CepurGG1@1G289500.1		Pp3c3_24520	Pp3c10_20360			10	scaffold-AWOI-2010725-Diphyscium_foliosum	cluster_1257	ABK3
abk3g01641	BA02G25760		Poh0343650	Poh0154060			Hypnum@jg10521.t1		Entodon@jg12609.t1		Sc_g02255		CepurR40.1G297900		CepurGG1@1G289500.1		Pp3c3_24520	Pp3c10_20360			10	scaffold-AWOI-2010725-Diphyscium_foliosum	cluster_1258	ABK3
abk3g01642	BA02G25760		Poh0343650	Poh0154060			Hypnum@jg10521.t1		Entodon@jg12609.t1		Sc_g02255		CepurR40.1G297900		CepurGG1@1G289500.1		Pp3c3_24520	Pp3c10_20360			10	scaffold-AWOI-2010725-Diphyscium_foliosum	cluster_1259	ABK3
abk3g01643	BA02G25770		Poh0343680	Poh0154040			Hypnum@jg10522.t1		Entodon@jg12607.t1		Sc_g02254		CepurR40.1G298000		CepurGG1@1G289600.1		Pp3c3_24510	Pp3c10_20380			10	scaffold-AWOI-2008738-Diphyscium_foliosum	cluster_1260	ABK3
abk3g01647	BA02G25770		Poh0343680	Poh0154040			Hypnum@jg10522.t1		Entodon@jg12607.t1		Sc_g02254		CepurR40.1G298000		CepurGG1@1G289600.1		Pp3c3_24510	Pp3c10_20380			10	scaffold-AWOI-2008738-Diphyscium_foliosum	cluster_1261	ABK3
abk3g01648	BA02G25770		Poh0343680	Poh0154040			Hypnum@jg10522.t1		Entodon@jg12607.t1		Sc_g02254		CepurR40.1G298000		CepurGG1@1G289600.1		Pp3c3_24510	Pp3c10_20380			10	scaffold-AWOI-2008738-Diphyscium_foliosum	cluster_1262	ABK3
abk3g01649	BA02G25760		Poh0343650	Poh0154060			Hypnum@jg10521.t1		Entodon@jg12609.t1		Sc_g02255		CepurR40.1G297900		CepurGG1@1G289500.1		Pp3c3_24520	Pp3c10_20360			10	scaffold-AWOI-2010725-Diphyscium_foliosum	cluster_1263	ABK3
abk3g01651	BA02G25720		Poh0343620	Poh0154100			Hypnum@jg10514.t1		Entodon@jg12616.t1		Sc_g02257	Sc_g04599	CepurR40.1G296900		CepurGG1@1G288300.1		Pp3c3_24540				10	scaffold-HRWG-2007329-Buxbaumia_aphylla	cluster_1264	ABK3
abk3g01675	BA02G25280	BA05G06600	Poh0345190	Poh0152650	Poh0147620			Hypnum@jg22823.t1	Entodon@jg5169.t1				CepurR40.1G292900		CepurGG1@1G284300.1		Pp3c3_24920	Pp3c10_22920			11	scaffold-AWOI-2072909-Diphyscium_foliosum	cluster_1265	ABK3
abk3g01698	BA02G10930		Poh0333960	Poh0089670			Hypnum@jg11082.t1		Entodon@jg12126.t1		Sc_g01860		CepurR40.1G238800		CepurGG1@1G233100.1		Pp3c3_25310	Pp3c10_15120			10	scaffold-AWOI-2009493-Diphyscium_foliosum	cluster_1266	ABK3
abk3g01699	BA02G10930		Poh0333960	Poh0089670			Hypnum@jg11082.t1		Entodon@jg12126.t1		Sc_g01860		CepurR40.1G238800		CepurGG1@1G233100.1		Pp3c3_25310	Pp3c10_15120			10	scaffold-AWOI-2009493-Diphyscium_foliosum	cluster_1267	ABK3
abk3g01700	BA02G10900		Poh0333980	Poh0089650			Hypnum@jg11070.t1		Entodon@jg12115.t1		Sc_g01862		CepurR40.1G238500		CepurGG1@1G232900.1		Pp3c3_25300	Pp3c10_15140			10	scaffold-AWOI-2070357-Diphyscium_foliosum	cluster_1268	ABK3
abk3g01706	BA02G10900		Poh0333980	Poh0089650			Hypnum@jg11070.t1		Entodon@jg12115.t1		Sc_g01862		CepurR40.1G238500		CepurGG1@1G232900.1		Pp3c3_25300	Pp3c10_15140			10	scaffold-AWOI-2070357-Diphyscium_foliosum	cluster_1269	ABK3
abk3g01707	BA02G10930		Poh0333960	Poh0089670			Hypnum@jg11082.t1		Entodon@jg12126.t1		Sc_g01860		CepurR40.1G238800		CepurGG1@1G233100.1		Pp3c3_25310	Pp3c10_15120			10	scaffold-AWOI-2009493-Diphyscium_foliosum	cluster_1270	ABK3
abk3g01710	BA02G10930		Poh0333960	Poh0089670			Hypnum@jg11082.t1		Entodon@jg12126.t1		Sc_g01860		CepurR40.1G238800		CepurGG1@1G233100.1		Pp3c3_25310	Pp3c10_15120			10	scaffold-AWOI-2009493-Diphyscium_foliosum	cluster_1271	ABK3
abk3g01720	BA02G10690		Poh0333890	Poh0089720			Hypnum@jg11086.t1		Entodon@jg12130.t1		Sc_g01435			CepurR40.1G241800	CepurGG1@1G236700.1		Pp3c3_25440	Pp3c10_14820			10	scaffold-HRWG-2070157-Buxbaumia_aphylla	cluster_1272	ABK3
abk3g01722	BA02G10690		Poh0333890	Poh0089720			Hypnum@jg11086.t1		Entodon@jg12130.t1		Sc_g01435			CepurR40.1G241800	CepurGG1@1G236700.1		Pp3c3_25440	Pp3c10_14820			10	scaffold-HRWG-2070157-Buxbaumia_aphylla	cluster_1273	ABK3
abk3g01753	BA02G23330		Poh0155690	Poh0274850			Hypnum@jg10487.t1		Entodon@jg12633.t1		Sc_g01245		CepurR40.1G203200		CepurGG1@1G217100.1		Pp3c3_25640	Pp3c4_11700			10	#N/A	cluster_1274	ABK3
abk3g01770	BA05G06660		Poh0147680	Poh0343440	Poh0154260			Hypnum@jg22831.t1		Entodon@jg5181.t1			CepurR40.1G294800	CepurR40.4G191500	CepurGG1@1G286400.1	CepurGG1@4G194700.1	Pp3c3_25900	Pp3c4_11250	Pp3c10_17530		13	scaffold-AWOI-2011782-Diphyscium_foliosum	cluster_1275	ABK3
abk3g01771	BA05G06660		Poh0147680	Poh0343440	Poh0154260			Hypnum@jg22831.t1		Entodon@jg5181.t1			CepurR40.1G294800	CepurR40.4G191500	CepurGG1@1G286400.1	CepurGG1@4G194700.1	Pp3c3_25900	Pp3c4_11250	Pp3c10_17530		13	scaffold-AWOI-2011782-Diphyscium_foliosum	cluster_1276	ABK3
abk3g01772	BA05G06660		Poh0147680	Poh0343440	Poh0154260			Hypnum@jg22831.t1		Entodon@jg5181.t1			CepurR40.1G294800	CepurR40.4G191500	CepurGG1@1G286400.1	CepurGG1@4G194700.1	Pp3c3_25900	Pp3c4_11250	Pp3c10_17530		13	scaffold-AWOI-2011782-Diphyscium_foliosum	cluster_1277	ABK3
abk3g01773	BA05G06660		Poh0147680	Poh0343440	Poh0154260			Hypnum@jg22831.t1		Entodon@jg5181.t1			CepurR40.1G294800	CepurR40.4G191500	CepurGG1@1G286400.1	CepurGG1@4G194700.1	Pp3c3_25900	Pp3c4_11250	Pp3c10_17530		13	scaffold-AWOI-2011782-Diphyscium_foliosum	cluster_1278	ABK3
abk3g01774	BA05G06670							Hypnum@jg22832.t1		Entodon@jg5180.t1			CepurR40.1G294900	CepurR40.4G191300	CepurGG1@1G286500.1	CepurGG1@4G194500.1	Pp3c3_25910	Pp3c4_11240	Pp3c10_17540		10	scaffold-HRWG-2000887-Buxbaumia_aphylla	cluster_1279	ABK3
abk3g01776	BA05G06670							Hypnum@jg22832.t1		Entodon@jg5180.t1			CepurR40.1G294900	CepurR40.4G191300	CepurGG1@1G286500.1	CepurGG1@4G194500.1	Pp3c3_25910	Pp3c4_11240	Pp3c10_17540		10	scaffold-HRWG-2000887-Buxbaumia_aphylla	cluster_1280	ABK3
abk3g01778	BA05G06780		Poh0147810	Poh0343510	Poh0154210			Hypnum@jg22849.t1		Entodon@jg5193.t1	Sc_g02135		CepurR40.1G296100		CepurGG1@1G287900.1		Pp3c3_25940				10	scaffold-AWOI-2071324-Diphyscium_foliosum	cluster_1281	ABK3
abk3g01781				Poh0343530	Poh0154200		Hypnum@jg10453.t1	Hypnum@jg22847.t1	Entodon@jg12661.t1	Entodon@jg5191.t1	Sc_g02143			CepurR40.4G189800		CepurGG1@4G192800.1	Pp3c3_26020		Pp3c10_17640		11	scaffold-HRWG-2016172-Buxbaumia_aphylla	cluster_1282	ABK3
abk3g01823	BA05G07040		Poh0146880	Poh0119560			Hypnum@jg22926.t1		Entodon@jg5235.t1		Sc_g04861		CepurR40.4G134700	CepurR40.1G215700	CepurGG1@4G135800.1	CepurGG1@1G205000.1	Pp3c3_26480	Pp3c4_16170	Pp3c12_4660		13	scaffold-AWOI-2005512-Diphyscium_foliosum	cluster_1283	ABK3
abk3g01830	BA05G07100						Hypnum@jg22923.t1		Entodon@jg5239.t1		Sc_g04864		CepurR40.4G134600	CepurR40.1G215900	CepurGG1@4G135700.1	CepurGG1@1G204900.1	Pp3c3_26490	Pp3c4_16190			10	scaffold-AWOI-2001159-Diphyscium_foliosum	cluster_1284	ABK3
abk3g01831	BA05G07100						Hypnum@jg22923.t1		Entodon@jg5239.t1		Sc_g04864		CepurR40.4G134600	CepurR40.1G215900	CepurGG1@4G135700.1	CepurGG1@1G204900.1	Pp3c3_26490	Pp3c4_16190			10	scaffold-AWOI-2001159-Diphyscium_foliosum	cluster_1285	ABK3
abk3g01832	BA05G07040			Poh0119560			Hypnum@jg22926.t1		Entodon@jg5235.t1		Sc_g04861		CepurR40.4G134700	CepurR40.1G215700	CepurGG1@4G135800.1	CepurGG1@1G205000.1	Pp3c3_26480	Pp3c4_16170	Pp3c12_4660		12	scaffold-AWOI-2005512-Diphyscium_foliosum	cluster_1286	ABK3
abk3g01837	BA05G07040			Poh0119560			Hypnum@jg22926.t1		Entodon@jg5235.t1		Sc_g04861		CepurR40.4G134700	CepurR40.1G215700	CepurGG1@4G135800.1	CepurGG1@1G205000.1	Pp3c3_26480	Pp3c4_16170	Pp3c12_4660		12	scaffold-AWOI-2005512-Diphyscium_foliosum	cluster_1287	ABK3
abk3g01838	BA05G07040		Poh0146880	Poh0119560			Hypnum@jg22926.t1		Entodon@jg5235.t1		Sc_g04861		CepurR40.4G134700	CepurR40.1G215700	CepurGG1@4G135800.1	CepurGG1@1G205000.1	Pp3c3_26480	Pp3c4_16170	Pp3c12_4660		13	scaffold-AWOI-2005512-Diphyscium_foliosum	cluster_1288	ABK3
abk3g01839	BA05G07100						Hypnum@jg22923.t1		Entodon@jg5239.t1		Sc_g04864		CepurR40.4G134600	CepurR40.1G215900	CepurGG1@4G135700.1	CepurGG1@1G204900.1	Pp3c3_26490	Pp3c4_16190			10	scaffold-AWOI-2001159-Diphyscium_foliosum	cluster_1289	ABK3
abk3g01844	BA05G07130		Poh0146920	Poh0119600			Hypnum@jg22918.t1		Entodon@jg5243.t1				CepurR40.4G134100	CepurR40.1G214900	CepurGG1@4G135300.1	CepurGG1@1G205700.1		Pp3c4_16270	Pp3c12_4630		11	scaffold-HRWG-2012906-Buxbaumia_aphylla	cluster_1290	ABK3
abk3g01845	BA05G07130		Poh0146920	Poh0119600			Hypnum@jg22918.t1		Entodon@jg5243.t1				CepurR40.4G134100	CepurR40.1G214900	CepurGG1@4G135300.1	CepurGG1@1G205700.1		Pp3c4_16270	Pp3c12_4630		11	scaffold-HRWG-2012906-Buxbaumia_aphylla	cluster_1291	ABK3
abk3g01846	BA05G07130		Poh0146920	Poh0119600			Hypnum@jg22918.t1		Entodon@jg5243.t1				CepurR40.4G134100	CepurR40.1G214900	CepurGG1@4G135300.1	CepurGG1@1G205700.1		Pp3c4_16270	Pp3c12_4630		11	scaffold-HRWG-2012906-Buxbaumia_aphylla	cluster_1292	ABK3
abk3g01956	BA05G03860				Poh0315260	Poh0143160	Hypnum@jg22405.t1			Entodon@jg5528.t1	Sc_g01734		CepurR40.1G285000		CepurGG1@1G276600.1		Pp3c3_27830	Pp3c8_4480	Pp3c4_9640		11	scaffold-AWOI-2069442-Diphyscium_foliosum	cluster_1293	ABK3
abk3g01960	BA05G03970		Poh0344840	Poh0152960	Poh0315240	Poh0143130	Hypnum@jg22399.t1		Entodon@jg12818.t1		Sc_g01735		CepurR40.1G284300		CepurGG1@1G275800.1		Pp3c3_27940	Pp3c8_4400			12	scaffold-AWOI-2010768-Diphyscium_foliosum	cluster_1294	ABK3
abk3g01961	BA05G03970		Poh0344840	Poh0152960	Poh0315240	Poh0143130		Hypnum@jg10281.t1	Entodon@jg12818.t1		Sc_g01735		CepurR40.1G284300	CepurR40.4G268800	CepurGG1@1G275800.1		Pp3c3_27940	Pp3c8_4400			13	scaffold-AWOI-2010768-Diphyscium_foliosum	cluster_1295	ABK3
abk3g01962	BA05G03970		Poh0344840	Poh0152960	Poh0315240	Poh0143130		Hypnum@jg10281.t1	Entodon@jg12818.t1		Sc_g01735		CepurR40.1G284300	CepurR40.4G268800	CepurGG1@1G275800.1		Pp3c3_27940	Pp3c8_4400			13	scaffold-AWOI-2010768-Diphyscium_foliosum	cluster_1296	ABK3
abk3g01963	BA05G03970		Poh0344840	Poh0152960	Poh0315240	Poh0143130	Hypnum@jg22399.t1	Hypnum@jg10281.t1	Entodon@jg12818.t1		Sc_g01735		CepurR40.1G284300	CepurR40.4G268800	CepurGG1@1G275800.1		Pp3c3_27940	Pp3c8_4400	Pp3c4_9300		15	scaffold-AWOI-2010768-Diphyscium_foliosum	cluster_1297	ABK3
abk3g01964	BA05G03940		Poh0344820	Poh0152980	Poh0315250	Poh0143140	Hypnum@jg22399.t1	Hypnum@jg10278.t1	Entodon@jg12820.t1	Entodon@jg5527.t1	Sc_g01732		CepurR40.1G284500		CepurGG1@1G276000.1		Pp3c3_27900	Pp3c8_4430	Pp3c4_9600		15	scaffold-HRWG-2012542-Buxbaumia_aphylla	cluster_1298	ABK3
abk3g01965	BA05G03960		Poh0344820	Poh0152980	Poh0315250	Poh0143140	Hypnum@jg22399.t1	Hypnum@jg10278.t1	Entodon@jg12820.t1	Entodon@jg5527.t1	Sc_g01732		CepurR40.1G284500		CepurGG1@1G276000.1		Pp3c3_27900	Pp3c8_4430	Pp3c4_9600		15	scaffold-HRWG-2012542-Buxbaumia_aphylla	cluster_1299	ABK3
abk3g01966	BA05G03950		Poh0344820	Poh0152980	Poh0315250	Poh0143140	Hypnum@jg22399.t1	Hypnum@jg10278.t1	Entodon@jg12820.t1	Entodon@jg5527.t1	Sc_g01732		CepurR40.1G284500		CepurGG1@1G276000.1		Pp3c3_27900	Pp3c8_4430	Pp3c4_9600		15	#N/A	cluster_1300	ABK3
abk3g01968	BA05G03940		Poh0344820	Poh0152980	Poh0315250	Poh0143140	Hypnum@jg22399.t1	Hypnum@jg10278.t1	Entodon@jg12820.t1	Entodon@jg5527.t1	Sc_g01732		CepurR40.1G284500		CepurGG1@1G276000.1		Pp3c3_27900	Pp3c8_4430	Pp3c4_9600		15	scaffold-HRWG-2012542-Buxbaumia_aphylla	cluster_1301	ABK3
abk3g01969	BA05G03940		Poh0344820	Poh0152980	Poh0315250	Poh0143140	Hypnum@jg22399.t1	Hypnum@jg10278.t1	Entodon@jg12820.t1	Entodon@jg5527.t1	Sc_g01732		CepurR40.1G284500		CepurGG1@1G276000.1		Pp3c3_27900	Pp3c8_4430	Pp3c4_9600		15	scaffold-AWOI-2071206-Diphyscium_foliosum	cluster_1302	ABK3
abk3g01970	BA05G03970		Poh0344840	Poh0152960	Poh0315240	Poh0143130	Hypnum@jg22392.t1	Hypnum@jg10281.t1	Entodon@jg12818.t1		Sc_g01735		CepurR40.1G284300	CepurR40.4G268800	CepurGG1@1G275800.1		Pp3c3_27940	Pp3c8_4400			14	scaffold-AWOI-2010768-Diphyscium_foliosum	cluster_1303	ABK3
abk3g01972	BA05G03990		Poh0344850	Poh0152950	Poh0315220	Poh0143110	Hypnum@jg22395.t1	Hypnum@jg10282.t1	Entodon@jg12816.t1	Entodon@jg5525.t1		Sc_g04041	CepurR40.1G284200	CepurR40.4G268600	CepurGG1@1G275700.1		Pp3c3_27980	Pp3c8_4390	Pp3c4_9430		16	scaffold-AWOI-2073709-Diphyscium_foliosum	cluster_1304	ABK3
abk3g02003	BA05G07980		Poh0120030	Poh0147320					Entodon@jg5346.t1		Sc_g01421	Sc_g04687	CepurR40.4G153200	CepurR40.1G250100	CepurGG1@4G154000.1	CepurGG1@1G244600.1	Pp3c3_28450	Pp3c10_18530			12	scaffold-AWOI-2070181-Diphyscium_foliosum	cluster_1305	ABK3
abk3g02005			Poh0120020	Poh0147310			Hypnum@jg22628.t1		Entodon@jg5347.t1		Sc_g01423	Sc_g04693	CepurR40.4G153500	CepurR40.1G249700	CepurGG1@4G154200.1	CepurGG1@1G244000.1		Pp3c10_18540			11	scaffold-AWOI-2011989-Diphyscium_foliosum	cluster_1306	ABK3
abk3g02006			Poh0120020	Poh0147310			Hypnum@jg22628.t1		Entodon@jg5347.t1		Sc_g01423	Sc_g04693	CepurR40.4G153500	CepurR40.1G249700	CepurGG1@4G154200.1	CepurGG1@1G244000.1		Pp3c10_18540			11	scaffold-AWOI-2011989-Diphyscium_foliosum	cluster_1307	ABK3
abk3g02009	BA05G07980		Poh0120000	Poh0147300					Entodon@jg5346.t1		Sc_g01421	Sc_g04687	CepurR40.4G153200	CepurR40.1G250100	CepurGG1@4G154000.1	CepurGG1@1G244600.1	Pp3c3_28450				11	scaffold-HRWG-2003971-Buxbaumia_aphylla	cluster_1308	ABK3
abk3g02011	BA05G07980		Poh0120000	Poh0147300					Entodon@jg5346.t1		Sc_g01421	Sc_g04687	CepurR40.4G153200	CepurR40.1G250100	CepurGG1@4G154000.1	CepurGG1@1G244600.1	Pp3c3_28450				11	scaffold-HRWG-2003971-Buxbaumia_aphylla	cluster_1309	ABK3
abk3g02014	BA05G08000		Poh0119990	Poh0147280			Hypnum@jg22625.t1		Entodon@jg5349.t1		Sc_g01424	Sc_g04694	CepurR40.4G153800		CepurGG1@4G154400.1		Pp3c3_28480				10	scaffold-AWOI-2011212-Diphyscium_foliosum	cluster_1310	ABK3
abk3g02015	BA05G08000		Poh0119990	Poh0147280			Hypnum@jg22625.t1		Entodon@jg5349.t1		Sc_g01424	Sc_g04694	CepurR40.4G153800		CepurGG1@4G154400.1		Pp3c3_28480				10	scaffold-AWOI-2011212-Diphyscium_foliosum	cluster_1311	ABK3
abk3g02016	BA05G07980		Poh0120030	Poh0147320					Entodon@jg5346.t1		Sc_g01421	Sc_g04687	CepurR40.4G153200		CepurGG1@4G154000.1		Pp3c3_28450	Pp3c10_18530			10	scaffold-AWOI-2070181-Diphyscium_foliosum	cluster_1312	ABK3
abk3g02020	BA05G07980		Poh0120030	Poh0147320					Entodon@jg5346.t1		Sc_g01421	Sc_g04687	CepurR40.4G153200		CepurGG1@4G154000.1		Pp3c3_28450	Pp3c10_18530			10	scaffold-AWOI-2070181-Diphyscium_foliosum	cluster_1313	ABK3
abk3g02022	BA05G08000		Poh0119990	Poh0147280			Hypnum@jg22625.t1		Entodon@jg5349.t1		Sc_g01424	Sc_g04694	CepurR40.4G153800		CepurGG1@4G154400.1		Pp3c3_28480	Pp3c10_18579			11	scaffold-AWOI-2011212-Diphyscium_foliosum	cluster_1314	ABK3
abk3g02037	BA02G29630		Poh0364360	Poh0149850			Hypnum@jg8840.t1		Entodon@jg14146.t1				CepurR40.1G185500	CepurR40.4G206500	CepurGG1@1G182100.1	CepurGG1@4G209300.1	Pp3c3_28970	Pp3c10_19020			11	scaffold-AWOI-2011253-Diphyscium_foliosum	cluster_1315	ABK3
abk3g02040	BA02G29630		Poh0364360	Poh0149850			Hypnum@jg8840.t1		Entodon@jg14146.t1				CepurR40.1G185500	CepurR40.4G206500	CepurGG1@1G182100.1	CepurGG1@4G209300.1	Pp3c3_28970	Pp3c10_19020			11	scaffold-AWOI-2011253-Diphyscium_foliosum	cluster_1316	ABK3
abk3g02051		BA05G00690	Poh0364190	Poh0149960	Poh0316660	Poh0141560		Hypnum@jg21730.t1			Sc_g04061		CepurR40.1G186100	CepurR40.4G205500	CepurGG1@1G182600.1	CepurGG1@4G208500.1	Pp3c3_29160	Pp3c10_19150			13	scaffold-AWOI-2008214-Diphyscium_foliosum	cluster_1317	ABK3
abk3g02053		BA05G00700			Poh0316670	Poh0141550	Hypnum@jg8853.t1	Hypnum@jg21733.t1	Entodon@jg14154.t1		Sc_g04060		CepurR40.1G186200	CepurR40.4G205700	CepurGG1@1G182800.1	CepurGG1@4G208600.1		Pp3c10_19190			12	scaffold-AWOI-2004516-Diphyscium_foliosum	cluster_1318	ABK3
abk3g02055		BA05G00690	Poh0364190	Poh0149960	Poh0316660	Poh0141560		Hypnum@jg21730.t1			Sc_g04061		CepurR40.1G186100	CepurR40.4G205500	CepurGG1@1G182600.1	CepurGG1@4G208500.1	Pp3c3_29160	Pp3c10_19150			13	scaffold-AWOI-2008214-Diphyscium_foliosum	cluster_1319	ABK3
abk3g02056	BA02G29810	BA05G00730	Poh0364100		Poh0316720	Poh0141500	Hypnum@jg8865.t1	Hypnum@jg21736.t1	Entodon@jg14163.t1		Sc_g04065		CepurR40.1G186700	CepurR40.4G206200	CepurGG1@1G183200.1	CepurGG1@4G209000.1	Pp3c3_29170	Pp3c10_19240			15	scaffold-AWOI-2073160-Diphyscium_foliosum	cluster_1320	ABK3
abk3g02143	BA02G21070	BA05G07860	Poh0275230	Poh0155380	Poh0120480		Hypnum@jg10418.t1	Hypnum@jg22649.t1	Entodon@jg12693.t1	Entodon@jg5327.t1	Sc_g01396						Pp3c3_30160	Pp3c10_13730			12	scaffold-AWOI-2009298-Diphyscium_foliosum	cluster_1321	ABK3
abk3g02144	BA02G21070	BA05G07860	Poh0275230	Poh0155380	Poh0120480		Hypnum@jg10418.t1	Hypnum@jg22649.t1	Entodon@jg12693.t1	Entodon@jg5327.t1	Sc_g01396						Pp3c3_30160	Pp3c10_13730			12	scaffold-AWOI-2009298-Diphyscium_foliosum	cluster_1322	ABK3
abk3g02145	BA02G21070	BA05G07730	Poh0275230	Poh0155380	Poh0120480		Hypnum@jg10418.t1	Hypnum@jg22649.t1	Entodon@jg12693.t1	Entodon@jg5327.t1	Sc_g01396						Pp3c3_30160	Pp3c10_13730			12	scaffold-AWOI-2009298-Diphyscium_foliosum	cluster_1323	ABK3
abk3g02150	BA02G21070	BA05G07860	Poh0275230	Poh0155380	Poh0120480		Hypnum@jg10418.t1	Hypnum@jg22649.t1	Entodon@jg12693.t1	Entodon@jg5321.t1	Sc_g01396						Pp3c3_30160	Pp3c10_13730			12	scaffold-HRWG-2016225-Buxbaumia_aphylla	cluster_1324	ABK3
abk3g02204		BA05G03660			Poh0352910	Poh0143980	Hypnum@jg9151.t1		Entodon@jg13802.t1		Sc_g02086		CepurR40.1G306500		CepurGG1@1G299900.1		Pp3c3_30850	Pp3c8_9030			10	scaffold-AWOI-2014724-Diphyscium_foliosum	cluster_1325	ABK3
abk3g02210		BA05G03660			Poh0352910	Poh0143980	Hypnum@jg9151.t1		Entodon@jg13802.t1		Sc_g02086		CepurR40.1G306500		CepurGG1@1G299900.1		Pp3c3_30900	Pp3c8_9030			10	scaffold-AWOI-2014724-Diphyscium_foliosum	cluster_1326	ABK3
abk3g02221	BA02G25550		Poh0343950	Poh0153800			Hypnum@jg9138.t1		Entodon@jg13816.t1		Sc_g02080		CepurR40.1G307900		CepurGG1@1G301500.1		Pp3c3_31010	Pp3c8_5490			10	scaffold-HRWG-2011950-Buxbaumia_aphylla	cluster_1327	ABK3
abk3g02222	BA02G25550		Poh0343950	Poh0153800			Hypnum@jg9138.t1		Entodon@jg13816.t1		Sc_g02080		CepurR40.1G307900		CepurGG1@1G301500.1		Pp3c3_31010	Pp3c8_5490			10	scaffold-HRWG-2011950-Buxbaumia_aphylla	cluster_1328	ABK3
abk3g02223	BA02G25550		Poh0343950	Poh0153800			Hypnum@jg9138.t1		Entodon@jg13816.t1		Sc_g02080		CepurR40.1G307900		CepurGG1@1G301500.1		Pp3c3_31010	Pp3c8_5490			10	scaffold-HRWG-2011950-Buxbaumia_aphylla	cluster_1329	ABK3
abk3g02224	BA02G25550		Poh0343950	Poh0153800			Hypnum@jg9138.t1		Entodon@jg13816.t1		Sc_g02080		CepurR40.1G307900		CepurGG1@1G301500.1		Pp3c3_31010	Pp3c8_5490			10	scaffold-HRWG-2011950-Buxbaumia_aphylla	cluster_1330	ABK3
abk3g02225	BA02G25560	BA05G03680	Poh0343970	Poh0153790	Poh0352810	Poh0143890	Hypnum@jg9136.t1		Entodon@jg13817.t1		Sc_g02089		CepurR40.1G308200		CepurGG1@1G301700.1		Pp3c3_30990				12	scaffold-HRWG-2014412-Buxbaumia_aphylla	cluster_1331	ABK3
abk3g02227	BA02G25560	BA05G03680	Poh0343970	Poh0153790	Poh0352810	Poh0143890	Hypnum@jg9136.t1		Entodon@jg13817.t1		Sc_g02089		CepurR40.1G308200		CepurGG1@1G301700.1		Pp3c3_30990				12	scaffold-AWOI-2073167-Diphyscium_foliosum	cluster_1332	ABK3
abk3g02228	BA02G25560	BA05G03680	Poh0343970	Poh0153790	Poh0352810	Poh0143890	Hypnum@jg9136.t1		Entodon@jg13817.t1		Sc_g02089		CepurR40.1G308200		CepurGG1@1G301700.1		Pp3c3_30990				12	scaffold-AWOI-2073167-Diphyscium_foliosum	cluster_1333	ABK3
abk3g02229	BA02G25550		Poh0343950	Poh0153800			Hypnum@jg9138.t1		Entodon@jg13816.t1		Sc_g02080		CepurR40.1G307900		CepurGG1@1G301500.1		Pp3c3_31010	Pp3c8_5490			10	scaffold-HRWG-2011950-Buxbaumia_aphylla	cluster_1334	ABK3
abk3g02231	BA02G25520		Poh0343940	Poh0153810	Poh0352850	Poh0143940	Hypnum@jg9140.t1		Entodon@jg13815.t1		Sc_g02079		CepurR40.1G307400		CepurGG1@1G300900.1		Pp3c3_31040	Pp3c8_5480			12	scaffold-HRWG-2002590-Buxbaumia_aphylla	cluster_1335	ABK3
abk3g02233	BA02G25500		Poh0343930	Poh0153820			Hypnum@jg9141.t1		Entodon@jg13814.t1		Sc_g02078		CepurR40.1G307300		CepurGG1@1G300800.1		Pp3c3_31080	Pp3c8_5420			10	scaffold-HRWG-2013427-Buxbaumia_aphylla	cluster_1336	ABK3
abk3g02234	BA02G25500		Poh0343930	Poh0153820			Hypnum@jg9141.t1		Entodon@jg13814.t1		Sc_g02078		CepurR40.1G307300		CepurGG1@1G300800.1		Pp3c3_31080	Pp3c8_5420			10	scaffold-HRWG-2013427-Buxbaumia_aphylla	cluster_1337	ABK3
abk3g02258	BA02G29950		Poh0372440	Poh0149350			Hypnum@jg8888.t1		Entodon@jg14199.t1				CepurR40.1G321300		CepurGG1@1G314800.1		Pp3c3_31500	Pp3c12_25330	Pp3c8_7340		10	scaffold-AWOI-2071412-Diphyscium_foliosum	cluster_1338	ABK3
abk3g02259	BA02G29950		Poh0372430	Poh0149330			Hypnum@jg8891.t1		Entodon@jg14194.t1				CepurR40.1G321200		CepurGG1@1G314700.1		Pp3c3_31490	Pp3c12_25330	Pp3c8_7340		10	scaffold-AWOI-2013375-Diphyscium_foliosum	cluster_1339	ABK3
abk3g02261	BA02G29950		Poh0372430	Poh0149330			Hypnum@jg8891.t1		Entodon@jg14194.t1				CepurR40.1G321200		CepurGG1@1G314700.1		Pp3c3_31490	Pp3c12_25330	Pp3c8_7340		10	scaffold-AWOI-2013375-Diphyscium_foliosum	cluster_1340	ABK3
abk3g02262	BA02G29950		Poh0372430	Poh0149330			Hypnum@jg8891.t1		Entodon@jg14194.t1				CepurR40.1G321200		CepurGG1@1G314700.1		Pp3c3_31490	Pp3c12_25330	Pp3c8_7340		10	scaffold-AWOI-2013375-Diphyscium_foliosum	cluster_1341	ABK3
abk3g02263	BA02G29950		Poh0372430	Poh0149330			Hypnum@jg8891.t1		Entodon@jg14194.t1				CepurR40.1G321200		CepurGG1@1G314700.1		Pp3c3_31490	Pp3c12_25330	Pp3c8_7340		10	scaffold-AWOI-2013375-Diphyscium_foliosum	cluster_1342	ABK3
abk3g02264	BA02G29950		Poh0372440	Poh0149350			Hypnum@jg8888.t1		Entodon@jg14199.t1				CepurR40.1G321300		CepurGG1@1G314800.1		Pp3c3_31500	Pp3c12_25330	Pp3c8_7340		10	scaffold-AWOI-2071412-Diphyscium_foliosum	cluster_1343	ABK3
abk3g02267	BA02G29890		Poh0372450	Poh0149370			Hypnum@jg8884.t1		Entodon@jg14203.t1				CepurR40.1G321400		CepurGG1@1G314900.1		Pp3c3_31560	Pp3c12_25380	Pp3c8_7360		10	scaffold-AWOI-2012855-Diphyscium_foliosum	cluster_1344	ABK3
abk3g02307					Poh0144870				Entodon@jg14016.t1		Sc_g02181	Sc_g04304	CepurR40.1G303900	CepurR40.4G253700	CepurGG1@1G296700.1	CepurGG1@4G263200.1	Pp3c3_31900	Pp3c12_22590			10	scaffold-AWOI-2072990-Diphyscium_foliosum	cluster_1345	ABK3
abk3g02309			Poh0360100	Poh0152220	Poh0144860				Entodon@jg14027.t1			Sc_g04303	CepurR40.1G304200	CepurR40.4G253500	CepurGG1@1G297000.1	CepurGG1@4G263400.1	Pp3c3_31980	Pp3c12_22500	Pp3c8_6890		12	scaffold-AWOI-2066408-Diphyscium_foliosum	cluster_1346	ABK3
abk3g02314			Poh0360080	Poh0152230	Poh0144850				Entodon@jg14025.t1		Sc_g02163	Sc_g04290	CepurR40.1G304400		CepurGG1@1G297500.1	CepurGG1@4G263700.1	Pp3c3_32050				10	scaffold-AWOI-2072112-Diphyscium_foliosum	cluster_1347	ABK3
abk3g02316			Poh0360080	Poh0152230	Poh0144850				Entodon@jg14025.t1		Sc_g02163	Sc_g04290	CepurR40.1G304400		CepurGG1@1G297500.1	CepurGG1@4G263700.1	Pp3c3_32050				10	scaffold-AWOI-2072112-Diphyscium_foliosum	cluster_1348	ABK3
abk3g02317			Poh0360080	Poh0152230	Poh0144850				Entodon@jg14025.t1		Sc_g02163	Sc_g04290	CepurR40.1G304400		CepurGG1@1G297500.1	CepurGG1@4G263700.1	Pp3c3_32050				10	scaffold-AWOI-2072112-Diphyscium_foliosum	cluster_1349	ABK3
abk3g02332	BA02G23600	BA05G07520	Poh0275330	Poh0155440	Poh0121270	Poh0148010			Entodon@jg12711.t1			Sc_g04679		CepurR40.4G146000		CepurGG1@4G147500.1	Pp3c3_32160				11	scaffold-AWOI-2073362-Diphyscium_foliosum	cluster_1350	ABK3
abk3g02395	BA02G28410		Poh0345290	Poh0152550			Hypnum@jg9699.t1		Entodon@jg13312.t1		Sc_g01799		CepurR40.1G336300		CepurGG1@1G328800.1		Pp3c3_33090	Pp3c4_2390	Pp3c10_19850		11	scaffold-AWOI-2073113-Diphyscium_foliosum	cluster_1351	ABK3
abk3g02399	BA02G28410		Poh0345290	Poh0152550			Hypnum@jg9699.t1		Entodon@jg13312.t1		Sc_g01799		CepurR40.1G336300		CepurGG1@1G328800.1		Pp3c3_33090	Pp3c4_2390	Pp3c10_19850		11	scaffold-AWOI-2073113-Diphyscium_foliosum	cluster_1352	ABK3
abk3g02400	BA02G28410		Poh0345290	Poh0152550			Hypnum@jg9699.t1		Entodon@jg13312.t1		Sc_g01799		CepurR40.1G336300		CepurGG1@1G328800.1		Pp3c3_33090	Pp3c4_2390	Pp3c10_19850		11	scaffold-AWOI-2073113-Diphyscium_foliosum	cluster_1353	ABK3
abk3g02401	BA02G28410		Poh0345290	Poh0152550			Hypnum@jg9699.t1		Entodon@jg13312.t1		Sc_g01799		CepurR40.1G336300		CepurGG1@1G328800.1		Pp3c3_33090	Pp3c4_2390	Pp3c10_19850		11	scaffold-AWOI-2073113-Diphyscium_foliosum	cluster_1354	ABK3
abk3g02402	BA02G28410		Poh0345290	Poh0152550			Hypnum@jg9699.t1		Entodon@jg13312.t1		Sc_g01799		CepurR40.1G336300	CepurR40.4G221400	CepurGG1@1G328800.1		Pp3c3_33090	Pp3c4_2390	Pp3c10_19850		12	scaffold-AWOI-2073113-Diphyscium_foliosum	cluster_1355	ABK3
abk3g02409	BA02G28520		Poh0345310	Poh0152530			Hypnum@jg9703.t1		Entodon@jg13315.t1		Sc_g01800		CepurR40.1G336500	CepurR40.4G221600	CepurGG1@1G329000.1	CepurGG1@4G226000.1	Pp3c3_33160	Pp3c4_2410			12	scaffold-AWOI-2072006-Diphyscium_foliosum	cluster_1356	ABK3
abk3g02412	BA02G28510		Poh0345320	Poh0152520					Entodon@jg13316.t1		Sc_g01801		CepurR40.1G336600	CepurR40.4G221700	CepurGG1@1G329100.1	CepurGG1@4G226100.1	Pp3c3_33210	Pp3c4_2450	Pp3c10_19910		12	scaffold-AWOI-2003938-Diphyscium_foliosum	cluster_1357	ABK3
abk3g02413	BA02G28500			Poh0152510			Hypnum@jg9711.t1		Entodon@jg13319.t1		Sc_g01797		CepurR40.1G336900	CepurR40.4G221800	CepurGG1@1G329400.1	CepurGG1@4G226300.1		Pp3c4_2530	Pp3c10_20000		11	scaffold-AWOI-2003254-Diphyscium_foliosum	cluster_1358	ABK3
abk3g02414	BA02G28510		Poh0345320	Poh0152520					Entodon@jg13316.t1		Sc_g01801		CepurR40.1G336600	CepurR40.4G221700	CepurGG1@1G329100.1	CepurGG1@4G226100.1	Pp3c3_33210	Pp3c4_2450	Pp3c10_19910		12	scaffold-AWOI-2003938-Diphyscium_foliosum	cluster_1359	ABK3
abk3g02420	BA02G28490			Poh0152500			Hypnum@jg9712.t1		Entodon@jg13321.t1		Sc_g01796		CepurR40.1G337000	CepurR40.4G222300	CepurGG1@1G329500.1	CepurGG1@4G226700.1	Pp3c3_33250		Pp3c10_20040		11	scaffold-AWOI-2073882-Diphyscium_foliosum	cluster_1360	ABK3
abk3g02430	BA02G28870		Poh0363740	Poh0150370			Hypnum@jg9104.t1		Entodon@jg13842.t1		Sc_g01663	Sc_g04359	CepurR40.1G262000	CepurR40.4G202200	CepurGG1@1G255600.1	CepurGG1@4G202700.1	Pp3c3_33380		Pp3c4_6310		13	scaffold-AWOI-2011056-Diphyscium_foliosum	cluster_1361	ABK3
abk3g02434	BA02G28930		Poh0363790	Poh0150320	Poh0142540		Hypnum@jg9116.t1		Entodon@jg13833.t1		Sc_g01661	Sc_g04356	CepurR40.1G262300	CepurR40.4G201900	CepurGG1@1G255900.1	CepurGG1@4G203100.1	Pp3c3_33410	Pp3c10_17070	Pp3c4_6260		15	scaffold-HRWG-2006669-Buxbaumia_aphylla	cluster_1362	ABK3
abk3g02435	BA02G28930		Poh0363790	Poh0150310	Poh0142540		Hypnum@jg9116.t1		Entodon@jg13833.t1		Sc_g01661	Sc_g04351	CepurR40.1G262300	CepurR40.4G201900	CepurGG1@1G255900.1	CepurGG1@4G203100.1	Pp3c3_33410	Pp3c10_17080	Pp3c4_6260		15	scaffold-HRWG-2006669-Buxbaumia_aphylla	cluster_1363	ABK3
abk3g02437	BA02G28930		Poh0363790	Poh0150310	Poh0142540		Hypnum@jg9109.t1		Entodon@jg13839.t1		Sc_g01661	Sc_g04356	CepurR40.1G262300	CepurR40.4G201900	CepurGG1@1G255900.1	CepurGG1@4G204300.1	Pp3c3_33410	Pp3c10_17070	Pp3c4_6230		15	#N/A	cluster_1364	ABK3
abk3g02439	BA02G28930		Poh0363800	Poh0150320	Poh0142540		Hypnum@jg9116.t1		Entodon@jg13838.t1		Sc_g01661	Sc_g04370	CepurR40.1G262300	CepurR40.4G201900	CepurGG1@1G255900.1	CepurGG1@4G204300.1	Pp3c3_33440	Pp3c10_17070	Pp3c4_6260		15	scaffold-HRWG-2006669-Buxbaumia_aphylla	cluster_1365	ABK3
abk3g02440	BA02G28930		Poh0363800	Poh0150310	Poh0142540		Hypnum@jg9116.t1		Entodon@jg13833.t1		Sc_g01661	Sc_g04356	CepurR40.1G262300	CepurR40.4G201900	CepurGG1@1G255900.1	CepurGG1@4G203100.1	Pp3c3_33440	Pp3c10_17070	Pp3c4_6260		15	scaffold-HRWG-2006669-Buxbaumia_aphylla	cluster_1366	ABK3
abk3g02441	BA02G28930		Poh0363800	Poh0150310	Poh0142540		Hypnum@jg9110.t1		Entodon@jg13833.t1		Sc_g01661	Sc_g04356	CepurR40.1G262300	CepurR40.4G201900	CepurGG1@1G255900.1	CepurGG1@4G204300.1	Pp3c3_33440	Pp3c10_17070	Pp3c4_6230		15	scaffold-HRWG-2006669-Buxbaumia_aphylla	cluster_1367	ABK3
abk3g02442	BA02G28930		Poh0363790	Poh0150310	Poh0142540		Hypnum@jg9116.t1		Entodon@jg13833.t1		Sc_g01661	Sc_g04356	CepurR40.1G262300	CepurR40.4G201900	CepurGG1@1G255900.1	CepurGG1@4G203100.1	Pp3c3_33440	Pp3c10_17070	Pp3c4_6260		15	scaffold-HRWG-2006669-Buxbaumia_aphylla	cluster_1368	ABK3
abk3g02443	BA02G28930		Poh0363790	Poh0150310	Poh0142540		Hypnum@jg9116.t1		Entodon@jg13833.t1		Sc_g01661	Sc_g04356	CepurR40.1G262300	CepurR40.4G201900	CepurGG1@1G255900.1	CepurGG1@4G204300.1	Pp3c3_33410	Pp3c10_17080	Pp3c4_6260		15	scaffold-HRWG-2006669-Buxbaumia_aphylla	cluster_1369	ABK3
abk3g02446	BA02G28930		Poh0363790	Poh0150320			Hypnum@jg9116.t1		Entodon@jg13833.t1		Sc_g01661		CepurR40.1G262300	CepurR40.4G200900	CepurGG1@1G255900.1		Pp3c3_33440	Pp3c10_17070	Pp3c4_6260		12	scaffold-HRWG-2006669-Buxbaumia_aphylla	cluster_1370	ABK3
abk3g02447	BA02G28940		Poh0363810	Poh0150300			Hypnum@jg9118.t1		Entodon@jg13831.t1		Sc_g01660		CepurR40.1G262500		CepurGG1@1G256000.1		Pp3c3_33470	Pp3c10_17060			10	scaffold-AWOI-2010224-Diphyscium_foliosum	cluster_1371	ABK3
abk3g02448	BA02G28940		Poh0363810	Poh0150300			Hypnum@jg9118.t1		Entodon@jg13831.t1		Sc_g01660		CepurR40.1G262500		CepurGG1@1G256000.1		Pp3c3_33470	Pp3c10_17060			10	scaffold-AWOI-2010224-Diphyscium_foliosum	cluster_1372	ABK3
abk3g02449	BA02G28930		Poh0363800	Poh0150310	Poh0142400		Hypnum@jg9107.t1		Entodon@jg13833.t1		Sc_g01661		CepurR40.1G262300	CepurR40.4G200900	CepurGG1@1G255900.1	CepurGG1@4G204300.1	Pp3c3_33440	Pp3c10_17080	Pp3c4_6260		14	scaffold-HRWG-2006670-Buxbaumia_aphylla	cluster_1373	ABK3
abk3g02450	BA02G28930		Poh0363800	Poh0150310	Poh0142400		Hypnum@jg9116.t1		Entodon@jg13833.t1		Sc_g01661		CepurR40.1G262300	CepurR40.4G200900	CepurGG1@1G255900.1	CepurGG1@4G204300.1	Pp3c3_33440	Pp3c10_17070	Pp3c4_6260		14	scaffold-HRWG-2006669-Buxbaumia_aphylla	cluster_1374	ABK3
abk3g02451	BA02G28930		Poh0363800	Poh0150320	Poh0142400		Hypnum@jg9116.t1		Entodon@jg13833.t1		Sc_g01661		CepurR40.1G262300	CepurR40.4G200900	CepurGG1@1G255900.1	CepurGG1@4G204300.1	Pp3c3_33440	Pp3c10_17070	Pp3c4_6260		14	scaffold-HRWG-2006669-Buxbaumia_aphylla	cluster_1375	ABK3
abk3g02453	BA02G28940		Poh0363810	Poh0150300			Hypnum@jg9118.t1		Entodon@jg13831.t1		Sc_g01660		CepurR40.1G262500		CepurGG1@1G256000.1		Pp3c3_33470	Pp3c10_17060			10	scaffold-AWOI-2010224-Diphyscium_foliosum	cluster_1376	ABK3
abk3g02456					Poh0142350		Hypnum@jg9123.t1		Entodon@jg13827.t1		Sc_g01658		CepurR40.1G262800	CepurR40.4G200600	CepurGG1@1G256400.1	CepurGG1@4G205000.1	Pp3c3_33500	Pp3c10_17770			10	scaffold-AWOI-2072057-Diphyscium_foliosum	cluster_1377	ABK3
abk3g02458					Poh0142350		Hypnum@jg9123.t1		Entodon@jg13827.t1		Sc_g01658		CepurR40.1G262800	CepurR40.4G200600	CepurGG1@1G256400.1	CepurGG1@4G205000.1	Pp3c3_33500	Pp3c10_17770			10	scaffold-AWOI-2072057-Diphyscium_foliosum	cluster_1378	ABK3
abk3g02461	BA02G28970		Poh0363900	Poh0150270			Hypnum@jg9126.t1		Entodon@jg13824.t1		Sc_g01656		CepurR40.1G263100		CepurGG1@1G256700.1		Pp3c3_33560	Pp3c10_17810			10	scaffold-AWOI-2007290-Diphyscium_foliosum	cluster_1379	ABK3
abk3g02475	BA02G29040		Poh0363970	Poh0150170			Hypnum@jg13637.t1		Entodon@jg14058.t1				CepurR40.1G264300		CepurGG1@1G257800.1		Pp3c3_33940	Pp3c10_17920	Pp3c4_6130		10	scaffold-HRWG-2004850-Buxbaumia_aphylla	cluster_1380	ABK3
abk3g02511	BA02G27240	BA05G13420	Poh0151330	Poh0359500			Hypnum@jg9007.t1		Entodon@jg13938.t1				CepurR40.1G193100	CepurR40.4G042200	CepurGG1@4G039000.1	CepurGG1@1G226700.1	Pp3c3_34630	Pp3c8_1520	Pp3c26_3070		13	scaffold-AWOI-2070408-Diphyscium_foliosum	cluster_1381	ABK3
abk3g02512	BA02G27240	BA05G13420	Poh0151330	Poh0359500	Poh0125890		Hypnum@jg9007.t1	Hypnum@jg23672.t1	Entodon@jg13938.t1				CepurR40.1G193100	CepurR40.4G042100	CepurGG1@4G038900.1	CepurGG1@1G226700.1	Pp3c3_34630	Pp3c8_1520	Pp3c26_3080		15	scaffold-HRWG-2001702-Buxbaumia_aphylla	cluster_1382	ABK3
abk3g02513	BA02G27250	BA05G13410	Poh0151340	Poh0359510	Poh0125890	Poh0231260	Hypnum@jg9008.t1	Hypnum@jg23671.t1	Entodon@jg13937.t1				CepurR40.1G193300	CepurR40.4G042000	CepurGG1@4G038800.1	CepurGG1@1G226600.1	Pp3c3_34620		Pp3c26_3080		15	scaffold-HRWG-2016885-Buxbaumia_aphylla	cluster_1383	ABK3
abk3g02514	BA02G27240	BA05G13420	Poh0151330	Poh0359500			Hypnum@jg9007.t1		Entodon@jg13938.t1				CepurR40.1G193100	CepurR40.4G042200	CepurGG1@4G039000.1	CepurGG1@1G226700.1	Pp3c3_34630	Pp3c8_1520	Pp3c26_3070		13	scaffold-AWOI-2070408-Diphyscium_foliosum	cluster_1384	ABK3
abk3g02517	BA02G27250	BA05G13400	Poh0151340	Poh0359510	Poh0125890	Poh0231250	Hypnum@jg9008.t1	Hypnum@jg23671.t1	Entodon@jg13937.t1		Sc_g01216		CepurR40.1G193300	CepurR40.4G042200	CepurGG1@4G039000.1	CepurGG1@1G226600.1	Pp3c3_34620		Pp3c26_3080		16	scaffold-HRWG-2016885-Buxbaumia_aphylla	cluster_1385	ABK3
abk3g02518	BA02G27240	BA05G13420	Poh0151330	Poh0359500			Hypnum@jg9007.t1		Entodon@jg13938.t1		Sc_g01216		CepurR40.1G193100	CepurR40.4G042200	CepurGG1@4G039000.1	CepurGG1@1G226700.1	Pp3c3_34630	Pp3c8_1520	Pp3c26_3070		14	scaffold-AWOI-2070408-Diphyscium_foliosum	cluster_1386	ABK3
abk3g02519	BA02G27250	BA05G13400	Poh0151340	Poh0359510	Poh0125890	Poh0231250	Hypnum@jg9008.t1	Hypnum@jg23671.t1	Entodon@jg13937.t1		Sc_g01216		CepurR40.1G193300	CepurR40.4G042200	CepurGG1@4G039000.1	CepurGG1@1G226600.1	Pp3c3_34620		Pp3c26_3080		16	scaffold-HRWG-2016885-Buxbaumia_aphylla	cluster_1387	ABK3
abk3g02520	BA02G27250	BA05G13420	Poh0151340	Poh0359510	Poh0125890	Poh0231250	Hypnum@jg9008.t1	Hypnum@jg23671.t1	Entodon@jg13937.t1		Sc_g01216		CepurR40.1G193300	CepurR40.4G042100	CepurGG1@4G038900.1	CepurGG1@1G226600.1	Pp3c3_34620	Pp3c8_1520	Pp3c26_3070		17	scaffold-HRWG-2016885-Buxbaumia_aphylla	cluster_1388	ABK3
abk3g02525		BA05G13370			Poh0125840	Poh0231190		Hypnum@jg23668.t1		Entodon@jg5794.t1				CepurR40.4G041700	CepurGG1@4G038500.1		Pp3c3_34670	Pp3c8_1590	Pp3c26_3230		10	scaffold-AWOI-2004191-Diphyscium_foliosum	cluster_1389	ABK3
abk3g02526	BA02G27250	BA05G13400	Poh0151340	Poh0359510	Poh0125890	Poh0231250	Hypnum@jg9008.t1	Hypnum@jg23671.t1	Entodon@jg13937.t1		Sc_g01216		CepurR40.1G193300	CepurR40.4G042100	CepurGG1@4G038900.1	CepurGG1@1G226600.1	Pp3c3_34620		Pp3c26_3080		16	scaffold-HRWG-2016885-Buxbaumia_aphylla	cluster_1390	ABK3
abk3g02527	BA02G27250	BA05G13410	Poh0151340	Poh0359510	Poh0125890	Poh0231260	Hypnum@jg9008.t1	Hypnum@jg23674.t1	Entodon@jg13937.t1		Sc_g01216		CepurR40.1G193300	CepurR40.4G042200	CepurGG1@4G039000.1	CepurGG1@1G226600.1	Pp3c3_34620	Pp3c8_1520	Pp3c26_3070		17	scaffold-HRWG-2016885-Buxbaumia_aphylla	cluster_1391	ABK3
abk3g02528		BA05G13370			Poh0125840	Poh0231190		Hypnum@jg23668.t1		Entodon@jg5794.t1				CepurR40.4G041700	CepurGG1@4G038500.1		Pp3c3_34670	Pp3c8_1590	Pp3c26_3230		10	scaffold-AWOI-2004191-Diphyscium_foliosum	cluster_1392	ABK3
abk3g02529	BA02G27240	BA05G13410	Poh0151330	Poh0359500	Poh0125890		Hypnum@jg9007.t1	Hypnum@jg23671.t1	Entodon@jg13938.t1		Sc_g01216		CepurR40.1G193100	CepurR40.4G042100	CepurGG1@4G038900.1	CepurGG1@1G226700.1	Pp3c3_34630	Pp3c8_1520	Pp3c26_3070		16	scaffold-HRWG-2001702-Buxbaumia_aphylla	cluster_1393	ABK3
abk3g02531		BA05G13370			Poh0125840	Poh0231190		Hypnum@jg23668.t1		Entodon@jg5794.t1				CepurR40.4G041700	CepurGG1@4G038500.1		Pp3c3_34670	Pp3c8_1590	Pp3c26_3230		10	scaffold-AWOI-2004191-Diphyscium_foliosum	cluster_1394	ABK3
abk3g02539					Poh0125710	Poh0231070				Entodon@jg5797.t1	Sc_g01231		CepurR40.1G192100	CepurR40.4G041100	CepurGG1@4G229200.1	CepurGG1@1G227700.1	Pp3c3_34790		Pp3c4_6910		10	scaffold-HRWG-2017361-Buxbaumia_aphylla	cluster_1395	ABK3
abk3g02557	BA02G26920		Poh0151000	Poh0359190			Hypnum@jg8988.t1		Entodon@jg13953.t1		Sc_g01750		CepurR40.1G255500	CepurR40.4G194600	CepurGG1@1G248900.1	CepurGG1@4G198000.1	Pp3c3_35060	Pp3c8_1720			12	scaffold-AWOI-2073574-Diphyscium_foliosum	cluster_1396	ABK3
abk3g02558	BA02G26920		Poh0151000	Poh0359190			Hypnum@jg8988.t1		Entodon@jg13953.t1		Sc_g01750		CepurR40.1G255500	CepurR40.4G194600	CepurGG1@1G248900.1	CepurGG1@4G198000.1	Pp3c3_35060	Pp3c8_1720			12	scaffold-AWOI-2073574-Diphyscium_foliosum	cluster_1397	ABK3
abk3g02559	BA02G26900		Poh0150980				Hypnum@jg8981.t1		Entodon@jg13955.t1		Sc_g01752		CepurR40.1G255700	CepurR40.4G195100	CepurGG1@1G249400.1	CepurGG1@4G198500.1	Pp3c3_35040	Pp3c8_1680			11	scaffold-AWOI-2012813-Diphyscium_foliosum	cluster_1398	ABK3
abk3g02563	BA02G26900		Poh0150980				Hypnum@jg8981.t1		Entodon@jg13955.t1		Sc_g01752		CepurR40.1G255700	CepurR40.4G195100	CepurGG1@1G249400.1	CepurGG1@4G198500.1	Pp3c3_35040	Pp3c8_1680			11	scaffold-HRWG-2011424-Buxbaumia_aphylla	cluster_1399	ABK3
abk3g02564	BA02G26930		Poh0151010	Poh0359180			Hypnum@jg8990.t1		Entodon@jg13952.t1				CepurR40.1G255200	CepurR40.4G194800	CepurGG1@1G249000.1	CepurGG1@4G198200.1	Pp3c3_35080	Pp3c8_1750			11	scaffold-AWOI-2013788-Diphyscium_foliosum	cluster_1400	ABK3
abk3g02565	BA02G26930		Poh0151010	Poh0359180			Hypnum@jg8990.t1		Entodon@jg13952.t1				CepurR40.1G255200	CepurR40.4G194800	CepurGG1@1G249000.1	CepurGG1@4G198200.1	Pp3c3_35080	Pp3c8_1750			11	scaffold-AWOI-2013788-Diphyscium_foliosum	cluster_1401	ABK3
abk3g02566	BA02G26930		Poh0151010	Poh0359180			Hypnum@jg8990.t1		Entodon@jg13952.t1				CepurR40.1G255200	CepurR40.4G194800	CepurGG1@1G249000.1	CepurGG1@4G198200.1	Pp3c3_35080	Pp3c8_1750			11	scaffold-AWOI-2013788-Diphyscium_foliosum	cluster_1402	ABK3
abk3g02567	BA02G26930		Poh0151010	Poh0359180			Hypnum@jg8990.t1		Entodon@jg13952.t1				CepurR40.1G255200	CepurR40.4G194800	CepurGG1@1G249000.1	CepurGG1@4G198200.1		Pp3c8_1750			10	scaffold-AWOI-2013788-Diphyscium_foliosum	cluster_1403	ABK3
abk3g02568	BA02G26930		Poh0151010	Poh0359180			Hypnum@jg8990.t1		Entodon@jg13952.t1				CepurR40.1G255200	CepurR40.4G194800	CepurGG1@1G249000.1	CepurGG1@4G198200.1	Pp3c3_35080	Pp3c8_1750			11	scaffold-AWOI-2013788-Diphyscium_foliosum	cluster_1404	ABK3
abk3g02569	BA02G26920		Poh0151000	Poh0359190			Hypnum@jg8988.t1		Entodon@jg13953.t1		Sc_g01750		CepurR40.1G255500	CepurR40.4G194600	CepurGG1@1G248900.1	CepurGG1@4G198000.1	Pp3c3_35060	Pp3c8_1720			12	scaffold-AWOI-2073574-Diphyscium_foliosum	cluster_1405	ABK3
abk3g02572	BA02G26920		Poh0151000	Poh0359190			Hypnum@jg8988.t1		Entodon@jg13953.t1		Sc_g01750		CepurR40.1G255500	CepurR40.4G194600	CepurGG1@1G248900.1	CepurGG1@4G198000.1	Pp3c3_35060	Pp3c8_1720			12	scaffold-AWOI-2073574-Diphyscium_foliosum	cluster_1406	ABK3
abk3g02573	BA02G26940		Poh0151020	Poh0359190			Hypnum@jg8993.t1		Entodon@jg13951.t1		Sc_g01750		CepurR40.1G255100	CepurR40.4G194600	CepurGG1@1G248900.1	CepurGG1@4G198000.1	Pp3c3_35060	Pp3c8_1800			12	scaffold-AWOI-2073390-Diphyscium_foliosum	cluster_1407	ABK3
abk3g02574	BA02G26940		Poh0151020	Poh0359190			Hypnum@jg8993.t1		Entodon@jg13951.t1		Sc_g01750		CepurR40.1G255100	CepurR40.4G194600	CepurGG1@1G248900.1	CepurGG1@4G198000.1	Pp3c3_35060	Pp3c8_1800			12	scaffold-AWOI-2073390-Diphyscium_foliosum	cluster_1408	ABK3
abk3g02575	BA02G26940		Poh0151020	Poh0359190			Hypnum@jg8993.t1		Entodon@jg13951.t1		Sc_g01750		CepurR40.1G255100	CepurR40.4G194600	CepurGG1@1G248900.1	CepurGG1@4G198000.1	Pp3c3_35060	Pp3c8_1800			12	scaffold-AWOI-2073390-Diphyscium_foliosum	cluster_1409	ABK3
abk3g02576	BA02G26920		Poh0151000	Poh0359190			Hypnum@jg8988.t1		Entodon@jg13953.t1		Sc_g01750		CepurR40.1G255500	CepurR40.4G194600	CepurGG1@1G248900.1	CepurGG1@4G198000.1	Pp3c3_35060	Pp3c8_1720			12	scaffold-AWOI-2073574-Diphyscium_foliosum	cluster_1410	ABK3
abk3g02577	BA02G26930		Poh0151010	Poh0359180			Hypnum@jg8990.t1		Entodon@jg13952.t1				CepurR40.1G255200	CepurR40.4G194800	CepurGG1@1G249000.1	CepurGG1@4G198200.1	Pp3c3_35080	Pp3c8_1750			11	scaffold-AWOI-2013788-Diphyscium_foliosum	cluster_1411	ABK3
abk3g02585	BA02G27280		Poh0151370	Poh0359540	Poh0274660		Hypnum@jg9013.t1		Entodon@jg13933.t1		Sc_g01757	Sc_g01517					Pp3c3_35190	Pp3c8_1960			10	scaffold-AWOI-2012032-Diphyscium_foliosum	cluster_1412	ABK3
abk3g02591	BA02G27280		Poh0151370	Poh0359540	Poh0274660		Hypnum@jg9013.t1		Entodon@jg13933.t1		Sc_g01757	Sc_g01517					Pp3c3_35190	Pp3c8_1960			10	scaffold-AWOI-2012032-Diphyscium_foliosum	cluster_1413	ABK3
abk3g02594	BA02G27310		Poh0151410	Poh0359580	Poh0274630		Hypnum@jg9019.t1		Entodon@jg13929.t1		Sc_g01756	Sc_g01519	CepurR40.1G256600		CepurGG1@1G250100.1		Pp3c3_35240				11	scaffold-AWOI-2012813-Diphyscium_foliosum	cluster_1414	ABK3
abk3g02595	BA02G27310		Poh0151410	Poh0359580	Poh0274630		Hypnum@jg9019.t1		Entodon@jg13929.t1		Sc_g01756	Sc_g01519	CepurR40.1G256600		CepurGG1@1G250100.1		Pp3c3_35240				11	scaffold-AWOI-2012813-Diphyscium_foliosum	cluster_1415	ABK3
abk3g02596	BA02G27530		Poh0151380	Poh0359570	Poh0274630		Hypnum@jg9017.t1		Entodon@jg13930.t1		Sc_g01756	Sc_g01519	CepurR40.1G256500		CepurGG1@1G250000.1		Pp3c3_35217				11	scaffold-AWOI-2012813-Diphyscium_foliosum	cluster_1416	ABK3
abk3g02598	BA02G27310		Poh0151410	Poh0359580	Poh0274630		Hypnum@jg9019.t1		Entodon@jg13929.t1		Sc_g01756	Sc_g01519	CepurR40.1G256600		CepurGG1@1G250100.1		Pp3c3_35240				11	scaffold-AWOI-2012813-Diphyscium_foliosum	cluster_1417	ABK3
abk3g02599	BA02G27310		Poh0151380	Poh0359570	Poh0274630		Hypnum@jg9017.t1		Entodon@jg13930.t1		Sc_g01756	Sc_g01519	CepurR40.1G256500		CepurGG1@1G250000.1		Pp3c3_35217				11	scaffold-AWOI-2012813-Diphyscium_foliosum	cluster_1418	ABK3
abk3g02600	BA02G27310		Poh0151410	Poh0359580	Poh0274630		Hypnum@jg9019.t1		Entodon@jg13929.t1		Sc_g01756	Sc_g01519	CepurR40.1G256600		CepurGG1@1G250100.1		Pp3c3_35240				11	scaffold-AWOI-2012813-Diphyscium_foliosum	cluster_1419	ABK3
abk3g02601	BA02G27320		Poh0151400	Poh0359570	Poh0274650		Hypnum@jg9017.t1		Entodon@jg13930.t1		Sc_g01756	Sc_g01520	CepurR40.1G256500		CepurGG1@1G250000.1		Pp3c3_35217				11	scaffold-HRWG-2011424-Buxbaumia_aphylla	cluster_1420	ABK3
abk3g02602	BA02G27320		Poh0151400	Poh0359570			Hypnum@jg9017.t1		Entodon@jg13930.t1		Sc_g01756	Sc_g01519	CepurR40.1G256500		CepurGG1@1G250000.1		Pp3c3_35217				10	#N/A	cluster_1421	ABK3
abk3g02603	BA02G27310		Poh0151410	Poh0359580	Poh0274630		Hypnum@jg9019.t1		Entodon@jg13929.t1		Sc_g01756	Sc_g01519	CepurR40.1G256600		CepurGG1@1G250100.1		Pp3c3_35240				11	scaffold-AWOI-2012813-Diphyscium_foliosum	cluster_1422	ABK3
abk3g02604	BA02G27310		Poh0151410	Poh0359580			Hypnum@jg9019.t1		Entodon@jg13929.t1		Sc_g01756	Sc_g01519	CepurR40.1G256600		CepurGG1@1G250100.1		Pp3c3_35240	Pp3c8_2010			11	scaffold-AWOI-2012813-Diphyscium_foliosum	cluster_1423	ABK3
abk3g02605	BA02G27310		Poh0151380	Poh0359570	Poh0274650		Hypnum@jg9017.t1		Entodon@jg13930.t1		Sc_g01756	Sc_g01520	CepurR40.1G256500		CepurGG1@1G250000.1		Pp3c3_35217	Pp3c8_2010			12	scaffold-HRWG-2011424-Buxbaumia_aphylla	cluster_1424	ABK3
abk3g02606	BA02G27310		Poh0151410	Poh0359580	Poh0274650		Hypnum@jg9019.t1		Entodon@jg13929.t1		Sc_g01756	Sc_g01519	CepurR40.1G256600		CepurGG1@1G250100.1		Pp3c3_35240				11	scaffold-AWOI-2012813-Diphyscium_foliosum	cluster_1425	ABK3
abk3g02611	BA02G27320		Poh0151430	Poh0359590	Poh0274650		Hypnum@jg9027.t1		Entodon@jg13924.t1		Sc_g01756	Sc_g01520			CepurGG1@1G250100.1		Pp3c3_35240	Pp3c8_2010			11	scaffold-AWOI-2012813-Diphyscium_foliosum	cluster_1426	ABK3
abk3g02612	BA02G27350		Poh0151440	Poh0359600			Hypnum@jg9028.t1		Entodon@jg13923.t1		Sc_g01760		CepurR40.1G257500		CepurGG1@1G250800.1		Pp3c3_35290	Pp3c8_2040			10	scaffold-AWOI-2004908-Diphyscium_foliosum	cluster_1427	ABK3
abk3g02615	BA02G27320		Poh0151430	Poh0359590	Poh0274650		Hypnum@jg9027.t1		Entodon@jg13924.t1		Sc_g01756	Sc_g01520	CepurR40.1G256500		CepurGG1@1G250000.1		Pp3c3_35240	Pp3c8_2010			12	scaffold-AWOI-2012813-Diphyscium_foliosum	cluster_1428	ABK3
abk3g02617	BA02G27320		Poh0151430	Poh0359590	Poh0274650		Hypnum@jg9027.t1		Entodon@jg13924.t1		Sc_g01756	Sc_g01520	CepurR40.1G256500		CepurGG1@1G250000.1		Pp3c3_35240	Pp3c8_2010			12	scaffold-HRWG-2011424-Buxbaumia_aphylla	cluster_1429	ABK3
abk3g02620	BA02G27330		Poh0151420				Hypnum@jg9025.t1		Entodon@jg13926.t1		Sc_g01754		CepurR40.1G256800	CepurR40.4G195300	CepurGG1@1G250300.1	CepurGG1@4G198800.1	Pp3c3_35270	Pp3c8_1990			11	#N/A	cluster_1430	ABK3
abk3g02624	BA02G27360		Poh0151450	Poh0359610			Hypnum@jg9031.t1		Entodon@jg13922.t1		Sc_g01761	Sc_g01516	CepurR40.1G257600		CepurGG1@1G250900.1		Pp3c3_35300	Pp3c8_2050			11	scaffold-AWOI-2014666-Diphyscium_foliosum	cluster_1431	ABK3
abk3g02625	BA02G27360		Poh0151450	Poh0359610			Hypnum@jg9031.t1		Entodon@jg13922.t1		Sc_g01761	Sc_g01516	CepurR40.1G257600		CepurGG1@1G250900.1		Pp3c3_35300	Pp3c8_2050			11	scaffold-HRWG-2001262-Buxbaumia_aphylla	cluster_1432	ABK3
abk3g02626		BA05G04310			Poh0315480	Poh0143400		Hypnum@jg22377.t1		Entodon@jg5566.t1	Sc_g04333		CepurR40.1G257700	CepurR40.4G195600	CepurGG1@1G251000.1	CepurGG1@4G199000.1	Pp3c3_35320	Pp3c8_2060			12	scaffold-AWOI-2068725-Diphyscium_foliosum	cluster_1433	ABK3
abk3g02628		BA05G04290			Poh0315440	Poh0143340		Hypnum@jg22374.t1		Entodon@jg5564.t1	Sc_g01763		CepurR40.1G257900		CepurGG1@1G251300.1		Pp3c3_35340	Pp3c8_2090			10	scaffold-AWOI-2014236-Diphyscium_foliosum	cluster_1434	ABK3
abk3g02629		BA05G04250	Poh0151470	Poh0359630	Poh0315430	Poh0143330		Hypnum@jg22376.t1		Entodon@jg5548.t1	Sc_g04346			CepurR40.4G196200		CepurGG1@4G199500.1	Pp3c3_35360	Pp3c8_2130			12	scaffold-HRWG-2005221-Buxbaumia_aphylla	cluster_1435	ABK3
abk3g02631	BA02G28640	BA05G04210			Poh0315400	Poh0143270					Sc_g04335	Sc_g01682	CepurR40.1G260000	CepurR40.4G196600	CepurGG1@1G253600.1	CepurGG1@4G199900.1	Pp3c3_35390	Pp3c8_2480			12	scaffold-AWOI-2070833-Diphyscium_foliosum	cluster_1436	ABK3
abk3g02633	BA02G27420		Poh0151490	Poh0359670			Hypnum@jg9038.t1		Entodon@jg13915.t1			Sc_g01671	CepurR40.1G258500		CepurGG1@1G251900.1		Pp3c3_35410	Pp3c8_2210			10	scaffold-AWOI-2011219-Diphyscium_foliosum	cluster_1437	ABK3
abk3g02687	BA02G27710		Poh0150770	Poh0363270			Hypnum@jg8949.t1		Entodon@jg13989.t1		Sc_g02046		CepurR40.1G196800		CepurGG1@1G223000.1		Pp3c3_36260	Pp3c8_3630			10	scaffold-AWOI-2071700-Diphyscium_foliosum	cluster_1438	ABK3
abk3g02688	BA02G27710		Poh0150770	Poh0363270			Hypnum@jg8949.t1		Entodon@jg13989.t1		Sc_g02046		CepurR40.1G196800		CepurGG1@1G223000.1		Pp3c3_36260	Pp3c8_3630			10	scaffold-HRWG-2004566-Buxbaumia_aphylla	cluster_1439	ABK3
abk3g02689	BA02G27710		Poh0150770	Poh0363270			Hypnum@jg8949.t1		Entodon@jg13989.t1		Sc_g02046		CepurR40.1G196800		CepurGG1@1G223000.1		Pp3c3_36260	Pp3c8_3630			10	scaffold-AWOI-2071700-Diphyscium_foliosum	cluster_1440	ABK3
abk3g02724	BA05G00470	BA02G26200			Poh0141810	Poh0316450	Hypnum@jg9199.t1		Entodon@jg13752.t1		Sc_g02167		CepurR40.1G317100		CepurGG1@1G309800.1		Pp3c3_36610				10	scaffold-HRWG-2005523-Buxbaumia_aphylla	cluster_1441	ABK3
abk3g02727	BA05G00480	BA02G26190	Poh0344310	Poh0153470	Poh0141800	Poh0316460	Hypnum@jg9201.t1	Hypnum@jg21783.t1	Entodon@jg13751.t1	Entodon@jg6093.t1	Sc_g02166		CepurR40.1G316900		CepurGG1@1G309700.1		Pp3c3_36640	Pp3c8_3500			15	scaffold-HRWG-2008931-Buxbaumia_aphylla	cluster_1442	ABK3
abk3g02729		BA02G26180	Poh0344300	Poh0153480	Poh0141770	Poh0316480	Hypnum@jg9202.t1		Entodon@jg13749.t1		Sc_g01742		CepurR40.1G316700		CepurGG1@1G309500.1		Pp3c3_36670	Pp3c8_3370	Pp3c12_23580		13	scaffold-AWOI-2001646-Diphyscium_foliosum	cluster_1443	ABK3
abk3g02733	BA05G00500				Poh0141760	Poh0316490		Hypnum@jg21779.t1		Entodon@jg6098.t1	Sc_g01743		CepurR40.1G316600		CepurGG1@1G309400.1		Pp3c3_36680	Pp3c8_3330	Pp3c12_23570		11	scaffold-AWOI-2073905-Diphyscium_foliosum	cluster_1444	ABK3
abk3g02734	BA05G00500				Poh0141760	Poh0316490		Hypnum@jg21779.t1		Entodon@jg6098.t1	Sc_g02160		CepurR40.1G316600		CepurGG1@1G309400.1		Pp3c3_36680	Pp3c8_3330	Pp3c12_23570		11	scaffold-AWOI-2073905-Diphyscium_foliosum	cluster_1445	ABK3
abk3g02735	BA05G00500				Poh0141760	Poh0316490		Hypnum@jg21779.t1		Entodon@jg6098.t1	Sc_g01743		CepurR40.1G316600		CepurGG1@1G309400.1		Pp3c3_36680	Pp3c8_3330	Pp3c12_23570		11	scaffold-AWOI-2073905-Diphyscium_foliosum	cluster_1446	ABK3
abk3g02736		BA02G26180	Poh0344300	Poh0153480	Poh0141770	Poh0316480	Hypnum@jg9202.t1		Entodon@jg13749.t1		Sc_g01742		CepurR40.1G316700		CepurGG1@1G309500.1		Pp3c3_36670	Pp3c8_3370	Pp3c12_23580		13	scaffold-AWOI-2001646-Diphyscium_foliosum	cluster_1447	ABK3
abk3g02737		BA02G26160	Poh0344170	Poh0153490			Hypnum@jg9203.t1		Entodon@jg13746.t1		Sc_g01744		CepurR40.1G316500		CepurGG1@1G309300.1		Pp3c3_36976	Pp3c8_3320			10	scaffold-HRWG-2014956-Buxbaumia_aphylla	cluster_1448	ABK3
abk3g02738		BA02G26180	Poh0344300	Poh0153480	Poh0141770	Poh0316480	Hypnum@jg9202.t1		Entodon@jg13749.t1		Sc_g01742		CepurR40.1G316700		CepurGG1@1G309500.1		Pp3c3_36670	Pp3c8_3370	Pp3c12_23580		13	scaffold-HRWG-2000603-Buxbaumia_aphylla	cluster_1449	ABK3
abk3g02739		BA02G26220	Poh0344290	Poh0153490			Hypnum@jg9203.t1		Entodon@jg13746.t1		Sc_g01744		CepurR40.1G316200		CepurGG1@1G308900.1		Pp3c3_36740	Pp3c8_3320			10	scaffold-HRWG-2014956-Buxbaumia_aphylla	cluster_1450	ABK3
abk3g02740	BA05G00500				Poh0141760	Poh0316490		Hypnum@jg21779.t1		Entodon@jg6098.t1	Sc_g01743		CepurR40.1G316600		CepurGG1@1G309400.1		Pp3c3_36680	Pp3c8_3330	Pp3c12_23570		11	scaffold-AWOI-2073905-Diphyscium_foliosum	cluster_1451	ABK3
abk3g02742		BA02G26220	Poh0344290	Poh0153490			Hypnum@jg9203.t1		Entodon@jg13746.t1		Sc_g01744		CepurR40.1G316200		CepurGG1@1G308900.1		Pp3c3_36740	Pp3c8_3320			10	scaffold-HRWG-2014956-Buxbaumia_aphylla	cluster_1452	ABK3
abk3g02743		BA02G26180	Poh0344300	Poh0153480	Poh0141770	Poh0316480	Hypnum@jg9202.t1		Entodon@jg13749.t1		Sc_g01742		CepurR40.1G316700		CepurGG1@1G309500.1		Pp3c3_36670	Pp3c8_3370	Pp3c12_23580		13	scaffold-HRWG-2000603-Buxbaumia_aphylla	cluster_1453	ABK3
abk3g02747	BA05G00500				Poh0141760			Hypnum@jg21779.t1		Entodon@jg6098.t1	Sc_g01743		CepurR40.1G316600		CepurGG1@1G309400.1		Pp3c3_36680	Pp3c8_3330	Pp3c12_23570		10	scaffold-HRWG-2009268-Buxbaumia_aphylla	cluster_1454	ABK3
abk3g02748		BA02G26220	Poh0344290	Poh0153490			Hypnum@jg9203.t1		Entodon@jg13746.t1		Sc_g01744		CepurR40.1G316500		CepurGG1@1G309300.1		Pp3c3_36740	Pp3c8_3320			10	scaffold-HRWG-2014956-Buxbaumia_aphylla	cluster_1455	ABK3
abk3g02751	BA05G00510		Poh0344250	Poh0153520	Poh0141740		Hypnum@jg9217.t1		Entodon@jg13733.t1				CepurR40.1G315100		CepurGG1@1G308000.1		Pp3c3_36760	Pp3c8_3290	Pp3c12_23490		11	scaffold-AWOI-2073048-Diphyscium_foliosum	cluster_1456	ABK3
abk3g02752		BA02G26160	Poh0344290	Poh0153490			Hypnum@jg9203.t1		Entodon@jg13746.t1		Sc_g01744		CepurR40.1G316200		CepurGG1@1G308900.1		Pp3c3_36740	Pp3c8_3320			10	scaffold-HRWG-2014956-Buxbaumia_aphylla	cluster_1457	ABK3
abk3g02753	BA05G00510		Poh0344250	Poh0153520	Poh0141740		Hypnum@jg9217.t1		Entodon@jg13733.t1				CepurR40.1G315100		CepurGG1@1G308000.1		Pp3c3_36760	Pp3c8_3290	Pp3c12_23490		11	scaffold-AWOI-2073048-Diphyscium_foliosum	cluster_1458	ABK3
abk3g02754		BA02G26230	Poh0344270	Poh0153500			Hypnum@jg9212.t1		Entodon@jg13741.t1		Sc_g01746		CepurR40.1G316400		CepurGG1@1G309200.1		Pp3c3_36750	Pp3c8_3310			10	scaffold-HRWG-2068668-Buxbaumia_aphylla	cluster_1459	ABK3
abk3g02756		BA02G26230	Poh0344270	Poh0153500			Hypnum@jg9212.t1		Entodon@jg13741.t1		Sc_g01746		CepurR40.1G315900		CepurGG1@1G308600.1		Pp3c3_36750	Pp3c8_3310			10	scaffold-HRWG-2068668-Buxbaumia_aphylla	cluster_1460	ABK3
abk3g02757	BA05G00510		Poh0344250	Poh0153520	Poh0141740		Hypnum@jg9217.t1		Entodon@jg13733.t1				CepurR40.1G315100		CepurGG1@1G308000.1		Pp3c3_36760	Pp3c8_3290	Pp3c12_23490		11	scaffold-AWOI-2073048-Diphyscium_foliosum	cluster_1461	ABK3
abk3g02758	BA05G00510		Poh0344250	Poh0153520	Poh0141740		Hypnum@jg9217.t1		Entodon@jg13733.t1				CepurR40.1G315100		CepurGG1@1G308000.1		Pp3c3_36775	Pp3c8_3290	Pp3c12_23490		11	scaffold-AWOI-2073048-Diphyscium_foliosum	cluster_1462	ABK3
abk3g02759	BA05G00510		Poh0344250	Poh0153520	Poh0141740		Hypnum@jg9217.t1		Entodon@jg13733.t1				CepurR40.1G315100		CepurGG1@1G308000.1		Pp3c3_36760	Pp3c8_3290	Pp3c12_23490		11	scaffold-HRWG-2016864-Buxbaumia_aphylla	cluster_1463	ABK3
abk3g02762	BA05G00520		Poh0344240	Poh0153530	Poh0141730		Hypnum@jg9215.t1	Hypnum@jg21774.t1	Entodon@jg13736.t1	Entodon@jg6101.t1			CepurR40.1G315200		CepurGG1@1G308100.1		Pp3c3_36800		Pp3c12_23510		12	scaffold-AWOI-2073495-Diphyscium_foliosum	cluster_1464	ABK3
abk3g02763	BA05G00520				Poh0141730		Hypnum@jg9215.t1	Hypnum@jg21774.t1	Entodon@jg13736.t1	Entodon@jg6101.t1			CepurR40.1G315200		CepurGG1@1G308100.1		Pp3c3_36800		Pp3c12_23510		10	scaffold-AWOI-2073495-Diphyscium_foliosum	cluster_1465	ABK3
abk3g02764	BA05G00520				Poh0141730		Hypnum@jg9215.t1	Hypnum@jg21774.t1	Entodon@jg13736.t1	Entodon@jg6101.t1			CepurR40.1G315200		CepurGG1@1G308100.1		Pp3c3_36800		Pp3c12_23510		10	scaffold-AWOI-2073495-Diphyscium_foliosum	cluster_1466	ABK3
abk3g02765	BA05G00520				Poh0141730		Hypnum@jg9215.t1	Hypnum@jg21774.t1	Entodon@jg13736.t1	Entodon@jg6101.t1			CepurR40.1G315200		CepurGG1@1G308100.1		Pp3c3_36800		Pp3c12_23510		10	scaffold-AWOI-2073495-Diphyscium_foliosum	cluster_1467	ABK3
abk3g02766	BA05G00520		Poh0344240	Poh0153530	Poh0141730		Hypnum@jg9215.t1	Hypnum@jg21774.t1	Entodon@jg13736.t1	Entodon@jg6101.t1			CepurR40.1G315200		CepurGG1@1G308100.1		Pp3c3_36800		Pp3c12_23510		12	scaffold-AWOI-2073495-Diphyscium_foliosum	cluster_1468	ABK3
abk3g02767	BA05G00520		Poh0344240	Poh0153530	Poh0141730		Hypnum@jg9215.t1	Hypnum@jg21774.t1	Entodon@jg13736.t1	Entodon@jg6101.t1			CepurR40.1G315200		CepurGG1@1G308100.1		Pp3c3_36800		Pp3c12_23510		12	scaffold-AWOI-2073495-Diphyscium_foliosum	cluster_1469	ABK3
abk3g02798	BA02G26810	BA05G00550	Poh0344150	Poh0153610				Hypnum@jg21770.t1		Entodon@jg6106.t1	Sc_g02218		CepurR40.1G314700		CepurGG1@1G307700.1		Pp3c3_37050	Pp3c8_2830			11	scaffold-HRWG-2069232-Buxbaumia_aphylla	cluster_1470	ABK3
abk3g02799	BA02G26810	BA05G00550	Poh0344150	Poh0153610				Hypnum@jg21770.t1		Entodon@jg6106.t1	Sc_g02218		CepurR40.1G314700		CepurGG1@1G307700.1		Pp3c3_37050	Pp3c8_2830			11	scaffold-HRWG-2069232-Buxbaumia_aphylla	cluster_1471	ABK3
abk3g02802	BA02G26790	BA05G00560	Poh0344140	Poh0153620				Hypnum@jg21767.t1		Entodon@jg6108.t1	Sc_g02219		CepurR40.1G314500		CepurGG1@1G307500.1		Pp3c3_37150	Pp3c8_2850			11	scaffold-HRWG-2016325-Buxbaumia_aphylla	cluster_1472	ABK3
abk3g02807	BA02G26810	BA05G00550	Poh0344150	Poh0153610				Hypnum@jg21770.t1		Entodon@jg6106.t1	Sc_g02218		CepurR40.1G314700		CepurGG1@1G307700.1		Pp3c3_37050	Pp3c8_2830			11	scaffold-HRWG-2069232-Buxbaumia_aphylla	cluster_1473	ABK3
abk3g02809	BA02G26810	BA05G00550	Poh0344150	Poh0153610				Hypnum@jg21770.t1		Entodon@jg6106.t1	Sc_g02218		CepurR40.1G314700		CepurGG1@1G307700.1		Pp3c3_37050	Pp3c8_2830			11	scaffold-AWOI-2011870-Diphyscium_foliosum	cluster_1474	ABK3
abk3g02816	BA02G26790	BA05G00560	Poh0344140	Poh0153620				Hypnum@jg21767.t1		Entodon@jg6108.t1	Sc_g02219		CepurR40.1G314500		CepurGG1@1G307500.1		Pp3c3_37150	Pp3c8_2850			11	scaffold-HRWG-2016325-Buxbaumia_aphylla	cluster_1475	ABK3
abk3g02823	BA02G26750		Poh0344100	Poh0153660			Hypnum@jg9635.t1		Entodon@jg13380.t1		Sc_g02236		CepurR40.1G313900		CepurGG1@1G307000.1		Pp3c3_37220	Pp3c8_2940			10	scaffold-AWOI-2008738-Diphyscium_foliosum	cluster_1476	ABK3
abk3g02824	BA02G26750		Poh0344100	Poh0153660			Hypnum@jg9635.t1		Entodon@jg13380.t1		Sc_g02236		CepurR40.1G313900		CepurGG1@1G307000.1		Pp3c3_37220	Pp3c8_2930			10	scaffold-AWOI-2008738-Diphyscium_foliosum	cluster_1477	ABK3
abk3g02825	BA02G26750		Poh0344100	Poh0153660			Hypnum@jg9635.t1		Entodon@jg13380.t1		Sc_g02236		CepurR40.1G313900		CepurGG1@1G307000.1		Pp3c3_37220	Pp3c8_2930			10	scaffold-AWOI-2008738-Diphyscium_foliosum	cluster_1478	ABK3
abk3g02835	BA02G26750		Poh0344100	Poh0153660			Hypnum@jg9635.t1		Entodon@jg13380.t1		Sc_g02236		CepurR40.1G313900		CepurGG1@1G307000.1		Pp3c3_37220	Pp3c8_2930			10	scaffold-AWOI-2008738-Diphyscium_foliosum	cluster_1479	ABK3
abk3g02836	BA02G26750		Poh0344100	Poh0153660			Hypnum@jg9635.t1		Entodon@jg13380.t1		Sc_g02236		CepurR40.1G313900		CepurGG1@1G307000.1		Pp3c3_37220	Pp3c8_2940			10	scaffold-AWOI-2008738-Diphyscium_foliosum	cluster_1480	ABK3
abk3g02839		BA05G00430	Poh0344350	Poh0153410	Poh0360370		Hypnum@jg9196.t1		Entodon@jg13754.t1		Sc_g02170		CepurR40.1G317300		CepurGG1@1G310000.1		Pp3c3_37280				10	scaffold-AWOI-2004944-Diphyscium_foliosum	cluster_1481	ABK3
abk3g02848		BA05G00430	Poh0344350	Poh0153410	Poh0360370		Hypnum@jg9196.t1		Entodon@jg13754.t1		Sc_g02170		CepurR40.1G317300		CepurGG1@1G310000.1		Pp3c3_37280				10	scaffold-HRWG-2001958-Buxbaumia_aphylla	cluster_1482	ABK3
abk3g02851		BA05G00430	Poh0344350	Poh0153410	Poh0360370		Hypnum@jg9196.t1		Entodon@jg13754.t1		Sc_g02170		CepurR40.1G317300		CepurGG1@1G310000.1		Pp3c3_37280				10	scaffold-AWOI-2004944-Diphyscium_foliosum	cluster_1483	ABK3
abk3g02852		BA05G00430	Poh0344350	Poh0153410	Poh0360370		Hypnum@jg9196.t1		Entodon@jg13754.t1		Sc_g02170		CepurR40.1G317300		CepurGG1@1G310000.1		Pp3c3_37280				10	scaffold-AWOI-2004944-Diphyscium_foliosum	cluster_1484	ABK3
abk3g02853		BA05G00430	Poh0344350	Poh0153410	Poh0360370		Hypnum@jg9196.t1		Entodon@jg13754.t1		Sc_g02170		CepurR40.1G317300		CepurGG1@1G310000.1		Pp3c3_37280				10	scaffold-HRWG-2001958-Buxbaumia_aphylla	cluster_1485	ABK3
abk3g02858	BA02G26130	BA05G00420	Poh0344370	Poh0153390			Hypnum@jg9189.t1		Entodon@jg13759.t1		Sc_g02154		CepurR40.1G317900	CepurR40.4G211600	CepurGG1@1G310600.1		Pp3c3_37330				11	scaffold-HRWG-2010016-Buxbaumia_aphylla	cluster_1486	ABK3
abk3g02870	BA02G22200		Poh0275980	Poh0154660			Hypnum@jg9929.t1		Entodon@jg13120.t1		Sc_g01815		CepurR40.1G329100	CepurR40.4G252400	CepurGG1@1G321800.1	CepurGG1@4G264600.1	Pp3c3_37470				11	scaffold-HRWG-2014609-Buxbaumia_aphylla	cluster_1487	ABK3
abk3g02872	BA02G22280		Poh0276070	Poh0154560			Hypnum@jg9944.t1		Entodon@jg13108.t1		Sc_g01818		CepurR40.1G329700	CepurR40.4G251800	CepurGG1@1G322300.1	CepurGG1@4G265300.1	Pp3c3_37490		Pp3c12_21540		12	scaffold-AWOI-2069974-Diphyscium_foliosum	cluster_1488	ABK3
abk3g02874	BA02G22270		Poh0276060	Poh0154570			Hypnum@jg9947.t1		Entodon@jg13103.t1		Sc_g01837		CepurR40.1G330000		CepurGG1@1G322600.1		Pp3c3_37540	Pp3c8_300			10	scaffold-AWOI-2012538-Diphyscium_foliosum	cluster_1489	ABK3
abk3g02877	BA02G22250		Poh0276030	Poh0154610			Hypnum@jg9953.t1		Entodon@jg13094.t1		Sc_g01835		CepurR40.1G330600	CepurR40.4G251600	CepurGG1@1G323300.1	CepurGG1@4G265500.1	Pp3c3_37660	Pp3c8_390	Pp3c12_21590		13	scaffold-HRWG-2002583-Buxbaumia_aphylla	cluster_1490	ABK3
abk3g02878	BA02G22250		Poh0276030	Poh0154610			Hypnum@jg9953.t1		Entodon@jg13094.t1		Sc_g01835		CepurR40.1G330600	CepurR40.4G251600	CepurGG1@1G323300.1	CepurGG1@4G265500.1	Pp3c3_37660	Pp3c8_390	Pp3c12_21590		13	scaffold-HRWG-2002583-Buxbaumia_aphylla	cluster_1491	ABK3
abk3g02879	BA02G22260		Poh0276040	Poh0154600			Hypnum@jg9953.t1		Entodon@jg13099.t1		Sc_g01836		CepurR40.1G330400	CepurR40.4G251600	CepurGG1@1G323000.1	CepurGG1@4G265500.1	Pp3c3_37640		Pp3c12_21560		12	scaffold-HRWG-2002583-Buxbaumia_aphylla	cluster_1492	ABK3
abk3g02887	BA02G22230		Poh0276010	Poh0154630			Hypnum@jg9963.t1		Entodon@jg13091.t1		Sc_g01824		CepurR40.1G331200	CepurR40.4G251000	CepurGG1@1G323900.1	CepurGG1@4G266000.1	Pp3c3_37710	Pp3c8_440	Pp3c12_21760		13	scaffold-AWOI-2072369-Diphyscium_foliosum	cluster_1493	ABK3
abk3g02888	BA02G22260		Poh0276040	Poh0154600			Hypnum@jg9953.t1		Entodon@jg13099.t1		Sc_g01836		CepurR40.1G330400	CepurR40.4G251600	CepurGG1@1G323000.1	CepurGG1@4G265500.1	Pp3c3_37640		Pp3c12_21560		12	scaffold-HRWG-2002583-Buxbaumia_aphylla	cluster_1494	ABK3
abk3g02889	BA02G22230		Poh0276010	Poh0154630			Hypnum@jg9963.t1		Entodon@jg13091.t1		Sc_g01824		CepurR40.1G331200	CepurR40.4G251000	CepurGG1@1G323900.1	CepurGG1@4G266000.1	Pp3c3_37710	Pp3c8_440	Pp3c12_21760		13	scaffold-AWOI-2072369-Diphyscium_foliosum	cluster_1495	ABK3
abk3g02890	BA02G22230		Poh0276010	Poh0154630			Hypnum@jg9963.t1		Entodon@jg13091.t1		Sc_g01824		CepurR40.1G331200	CepurR40.4G251000	CepurGG1@1G323900.1	CepurGG1@4G266000.1	Pp3c3_37710	Pp3c8_440	Pp3c12_21760		13	scaffold-AWOI-2072369-Diphyscium_foliosum	cluster_1496	ABK3
abk3g02891	BA02G22260		Poh0276040	Poh0154600			Hypnum@jg9953.t1		Entodon@jg13099.t1		Sc_g01836		CepurR40.1G330400	CepurR40.4G251600	CepurGG1@1G323000.1	CepurGG1@4G265500.1	Pp3c3_37640	Pp3c8_390	Pp3c12_21560		13	scaffold-HRWG-2002583-Buxbaumia_aphylla	cluster_1497	ABK3
abk3g02892	BA02G22260		Poh0276040	Poh0154600			Hypnum@jg9953.t1		Entodon@jg13099.t1		Sc_g01836		CepurR40.1G330400	CepurR40.4G251600	CepurGG1@1G323000.1	CepurGG1@4G265500.1	Pp3c3_37640	Pp3c8_390	Pp3c12_21560		13	scaffold-HRWG-2002583-Buxbaumia_aphylla	cluster_1498	ABK3
abk3g02893	BA02G22250		Poh0276030	Poh0154610			Hypnum@jg9953.t1		Entodon@jg13094.t1		Sc_g01835		CepurR40.1G330600	CepurR40.4G251600	CepurGG1@1G323300.1	CepurGG1@4G265500.1	Pp3c3_37660	Pp3c8_390	Pp3c12_21590		13	scaffold-HRWG-2002583-Buxbaumia_aphylla	cluster_1499	ABK3
abk3g02895	BA02G22250		Poh0276030	Poh0154610			Hypnum@jg9953.t1		Entodon@jg13094.t1		Sc_g01835		CepurR40.1G330600	CepurR40.4G251600	CepurGG1@1G323000.1	CepurGG1@4G265500.1	Pp3c3_37660	Pp3c8_390	Pp3c12_21590		13	scaffold-HRWG-2002583-Buxbaumia_aphylla	cluster_1500	ABK3
abk3g02896	BA02G22230		Poh0276010	Poh0154630			Hypnum@jg9963.t1		Entodon@jg13091.t1		Sc_g01824		CepurR40.1G331200	CepurR40.4G251000	CepurGG1@1G323900.1	CepurGG1@4G266000.1	Pp3c3_37710	Pp3c8_440	Pp3c12_21760		13	scaffold-AWOI-2072369-Diphyscium_foliosum	cluster_1501	ABK3
abk4g01869	BA07G02990		Poh0061200	Poh0313170	Poh0023810	Poh0281150	Hypnum@jg8131.t1		Entodon@jg24603.t1		Sc_g07707		CepurR40.5G124800		CepurGG1@5G104900.1		Pp3c16_810				11	scaffold-HRWG-2067955-Buxbaumia_aphylla	cluster_1502	ABK4
abk4g01993	BA07G03090		Poh0061250	Poh0313130	Poh0023820		Hypnum@jg8123.t1		Entodon@jg24610.t1		Sc_g07716		CepurR40.5G125400		CepurGG1@5G104200.1		Pp3c16_920				10	scaffold-HRWG-2004914-Buxbaumia_aphylla	cluster_1503	ABK4
abk4g00056		BA04G07730	Poh0059260	Poh0223630	Poh0023910	Poh0281250			Entodon@jg25154.t1				CepurR40.5G027100		CepurGG1@5G028900.1		Pp3c16_1090	Pp3c27_3260			10	scaffold-HRWG-2012070-Buxbaumia_aphylla	cluster_1504	ABK4
abk4g00985		BA07G12120	Poh0226140	Poh0055880				Hypnum@jg7032.t1		Entodon@jg25558.t1	Sc_g08208		CepurR40.5G180900		CepurGG1@5G173100.1		Pp3c16_2030	Pp3c25_1490			10	#N/A	cluster_1505	ABK4
abk4g01297		BA04G05360	Poh0226060	Poh0055970			Hypnum@jg20933.t1		Entodon@jg2961.t1		Sc_g08198		CepurR40.5G179900		CepurGG1@5G172100.1		Pp3c16_2470	Pp3c5_4460			10	scaffold-HRWG-2017463-Buxbaumia_aphylla	cluster_1506	ABK4
abk4g01298		BA04G05370	Poh0226070	Poh0055950			Hypnum@jg20934.t1		Entodon@jg2962.t1		Sc_g08199		CepurR40.5G180100		CepurGG1@5G172300.1		Pp3c16_2460	Pp3c5_4470			10	scaffold-AWOI-2006525-Diphyscium_foliosum	cluster_1507	ABK4
abk4g01299		BA04G05360	Poh0226060	Poh0055970			Hypnum@jg20933.t1		Entodon@jg2961.t1		Sc_g08198		CepurR40.5G179900		CepurGG1@5G172100.1		Pp3c16_2470	Pp3c5_4460			10	scaffold-HRWG-2017463-Buxbaumia_aphylla	cluster_1508	ABK4
abk4g01328		BA04G05180	Poh0224130	Poh0057900	Poh0025430	Poh0282890	Hypnum@jg20953.t1						CepurR40.5G192400		CepurGG1@5G185200.1		Pp3c16_2550	Pp3c5_4250			10	scaffold-AWOI-2008011-Diphyscium_foliosum	cluster_1509	ABK4
abk4g01331		BA04G05180	Poh0224130	Poh0057900	Poh0025430	Poh0282890	Hypnum@jg20953.t1						CepurR40.5G192400		CepurGG1@5G185200.1		Pp3c16_2550	Pp3c5_4250			10	scaffold-AWOI-2008011-Diphyscium_foliosum	cluster_1510	ABK4
abk4g01342	BA07G10330	BA04G05170	Poh0224120	Poh0057910	Poh0025440	Poh0282900	Hypnum@jg20954.t1		Entodon@jg25507.t1		Sc_g08227		CepurR40.5G192300		CepurGG1@5G185100.1		Pp3c16_2570	Pp3c5_4240			13	scaffold-AWOI-2070087-Diphyscium_foliosum	cluster_1511	ABK4
abk4g01344	BA07G10390	BA04G05110	Poh0224100	Poh0057920	Poh0025530	Poh0282960	Hypnum@jg20962.t1		Entodon@jg25504.t1		Sc_g08228		CepurR40.5G192200		CepurGG1@5G185000.1		Pp3c16_2580	Pp3c5_4350			13	scaffold-AWOI-2003938-Diphyscium_foliosum	cluster_1512	ABK4
abk4g01424	BA07G12350	BA04G05840	Poh0056250	Poh0225740	Poh0025320	Poh0282820	Hypnum@jg6963.t1	Hypnum@jg20844.t1	Entodon@jg25614.t1	Entodon@jg3025.t1	Sc_g07973		CepurR40.5G195300		CepurGG1@5G188100.1		Pp3c16_3180				14	scaffold-AWOI-2012991-Diphyscium_foliosum	cluster_1513	ABK4
abk4g01425	BA07G12350	BA04G05840	Poh0056250	Poh0225740	Poh0025320	Poh0282820	Hypnum@jg6963.t1	Hypnum@jg20844.t1	Entodon@jg25614.t1	Entodon@jg3025.t1	Sc_g07973		CepurR40.5G195300		CepurGG1@5G188100.1		Pp3c16_3180				14	scaffold-AWOI-2012991-Diphyscium_foliosum	cluster_1514	ABK4
abk4g01426	BA07G12350	BA04G05840	Poh0056250	Poh0225740	Poh0025320	Poh0282820	Hypnum@jg6963.t1	Hypnum@jg20844.t1	Entodon@jg25614.t1	Entodon@jg3025.t1	Sc_g07973		CepurR40.5G195300		CepurGG1@5G188100.1		Pp3c16_3180				14	scaffold-AWOI-2012991-Diphyscium_foliosum	cluster_1515	ABK4
abk4g01427	BA07G12350	BA04G05840	Poh0056250	Poh0225740	Poh0025320	Poh0282820	Hypnum@jg6963.t1	Hypnum@jg20844.t1	Entodon@jg25614.t1	Entodon@jg3025.t1	Sc_g07973		CepurR40.5G195300		CepurGG1@5G188100.1		Pp3c16_3180				14	scaffold-AWOI-2012992-Diphyscium_foliosum	cluster_1516	ABK4
abk4g01428	BA07G12330	BA04G05860	Poh0056280	Poh0225720	Poh0025300	Poh0282840	Hypnum@jg6961.t1	Hypnum@jg20849.t1	Entodon@jg25617.t1	Entodon@jg3027.t1	Sc_g07971		CepurR40.5G195500		CepurGG1@5G188300.1		Pp3c16_3170	Pp3c27_3440			15	scaffold-HRWG-2069487-Buxbaumia_aphylla	cluster_1517	ABK4
abk4g01432	BA07G12330	BA04G05860	Poh0056280	Poh0225720	Poh0025300	Poh0282840	Hypnum@jg6961.t1	Hypnum@jg20849.t1	Entodon@jg25617.t1	Entodon@jg3027.t1	Sc_g07971		CepurR40.5G195500		CepurGG1@5G188300.1		Pp3c16_3170	Pp3c27_3440			15	scaffold-HRWG-2069487-Buxbaumia_aphylla	cluster_1518	ABK4
abk4g01433	BA07G12330	BA04G05860	Poh0056280	Poh0225720	Poh0025300	Poh0282840	Hypnum@jg6961.t1	Hypnum@jg20849.t1	Entodon@jg25617.t1	Entodon@jg3027.t1	Sc_g07971		CepurR40.5G195500		CepurGG1@5G188300.1		Pp3c16_3170	Pp3c27_3440			15	scaffold-HRWG-2069487-Buxbaumia_aphylla	cluster_1519	ABK4
abk4g01434	BA07G12330	BA04G05860	Poh0056280	Poh0225720	Poh0025300	Poh0282840	Hypnum@jg6961.t1	Hypnum@jg20849.t1	Entodon@jg25617.t1	Entodon@jg3027.t1	Sc_g07971		CepurR40.5G195500		CepurGG1@5G188300.1		Pp3c16_3170	Pp3c27_3440			15	scaffold-HRWG-2069487-Buxbaumia_aphylla	cluster_1520	ABK4
abk4g01435	BA07G12350	BA04G05840	Poh0056250	Poh0225740	Poh0025320	Poh0282820	Hypnum@jg6963.t1	Hypnum@jg20844.t1	Entodon@jg25614.t1	Entodon@jg3025.t1	Sc_g07973		CepurR40.5G195300		CepurGG1@5G188100.1		Pp3c16_3180				14	scaffold-AWOI-2012991-Diphyscium_foliosum	cluster_1521	ABK4
abk4g01513			Poh0028060	Poh0285500	Poh0221490	Poh0060790	Hypnum@jg21350.t1		Entodon@jg3453.t1				CepurR40.5G090900		CepurGG1@5G083300.1		Pp3c16_4650	Pp3c27_5090			10	scaffold-HRWG-2014933-Buxbaumia_aphylla	cluster_1522	ABK4
abk4g01519			Poh0028060	Poh0285500	Poh0221490	Poh0060790	Hypnum@jg21350.t1		Entodon@jg3453.t1				CepurR40.5G090900		CepurGG1@5G083300.1		Pp3c16_4650	Pp3c27_5090			10	scaffold-AWOI-2012853-Diphyscium_foliosum	cluster_1523	ABK4
abk4g01520			Poh0028060	Poh0285500	Poh0221490	Poh0060790	Hypnum@jg21350.t1		Entodon@jg3453.t1				CepurR40.5G090900		CepurGG1@5G083300.1		Pp3c16_4650	Pp3c27_5090			10	scaffold-HRWG-2014933-Buxbaumia_aphylla	cluster_1524	ABK4
abk4g01521			Poh0028060	Poh0285500	Poh0221490	Poh0060790	Hypnum@jg21350.t1		Entodon@jg3453.t1				CepurR40.5G090900		CepurGG1@5G083300.1		Pp3c16_4650	Pp3c27_5090			10	scaffold-AWOI-2012853-Diphyscium_foliosum	cluster_1525	ABK4
abk4g01522			Poh0028060	Poh0285500	Poh0221490	Poh0060790	Hypnum@jg21350.t1		Entodon@jg3453.t1				CepurR40.5G090900		CepurGG1@5G083300.1		Pp3c16_4650	Pp3c27_5090			10	scaffold-AWOI-2012853-Diphyscium_foliosum	cluster_1526	ABK4
abk4g01523			Poh0028080	Poh0285520	Poh0221510	Poh0060830	Hypnum@jg21352.t1		Entodon@jg3455.t1		Sc_g07525		CepurR40.5G091600		CepurGG1@5G082400.1		Pp3c16_4660	Pp3c27_5110			11	scaffold-HRWG-2070459-Buxbaumia_aphylla	cluster_1527	ABK4
abk4g01570	BA07G12620		Poh0225940	Poh0056040	Poh0285030		Hypnum@jg6991.t1		Entodon@jg25591.t1		Sc_g08284		CepurR40.5G178300		CepurGG1@5G170700.1			Pp3c27_2440			10	#N/A	cluster_1528	ABK4
abk4g01571	BA07G12620		Poh0225940	Poh0056040	Poh0285030		Hypnum@jg6991.t1		Entodon@jg25591.t1	Entodon@jg3165.t1	Sc_g08284		CepurR40.5G178300		CepurGG1@5G170700.1			Pp3c27_2440			11	#N/A	cluster_1529	ABK4
abk4g01579	BA07G12620		Poh0225940	Poh0056040	Poh0285030		Hypnum@jg6991.t1		Entodon@jg25591.t1	Entodon@jg3165.t1	Sc_g08284		CepurR40.5G178300		CepurGG1@5G170700.1			Pp3c27_2440			11	#N/A	cluster_1530	ABK4
abk4g01580	BA07G12620		Poh0225940	Poh0056040	Poh0285030		Hypnum@jg6991.t1		Entodon@jg25591.t1	Entodon@jg3165.t1	Sc_g08284		CepurR40.5G178300		CepurGG1@5G170700.1			Pp3c27_2440			11	#N/A	cluster_1531	ABK4
abk4g01700	BA04G08310		Poh0023370	Poh0336140				Hypnum@jg20298.t1		Entodon@jg2490.t1	Sc_g07586		CepurR40.5G025500		CepurGG1@5G027000.1		Pp3c16_6460	Pp3c5_14440			10	scaffold-AWOI-2072683-Diphyscium_foliosum	cluster_1532	ABK4
abk4g01763	BA07G04190		Poh0311670		Poh0065940		Hypnum@jg8264.t1		Entodon@jg24475.t1		Sc_g07459		CepurR40.5G013900		CepurGG1@5G015500.1		Pp3c16_6990	Pp3c25_560			10	scaffold-AWOI-2069213-Diphyscium_foliosum	cluster_1533	ABK4
abk4g01767	BA07G04220	BA04G18980	Poh0311640		Poh0065960		Hypnum@jg8253.t1		Entodon@jg24486.t1		Sc_g07475		CepurR40.5G013300		CepurGG1@5G015000.1		Pp3c16_7020				10	scaffold-AWOI-2001345-Diphyscium_foliosum	cluster_1534	ABK4
abk4g01768	BA07G04220	BA04G18980	Poh0311640		Poh0065960		Hypnum@jg8253.t1		Entodon@jg24486.t1		Sc_g07475		CepurR40.5G013300		CepurGG1@5G015000.1		Pp3c16_7020				10	scaffold-AWOI-2001345-Diphyscium_foliosum	cluster_1535	ABK4
abk4g01775	BA07G04220	BA04G18980	Poh0311640		Poh0065960		Hypnum@jg8253.t1		Entodon@jg24486.t1		Sc_g07475		CepurR40.5G013300		CepurGG1@5G015000.1		Pp3c16_7020				10	scaffold-AWOI-2001345-Diphyscium_foliosum	cluster_1536	ABK4
abk4g01783	BA07G04240	BA04G18830		Poh0116210			Hypnum@jg8267.t1	Hypnum@jg18722.t1	Entodon@jg24473.t1	Entodon@jg1145.t1			CepurR40.5G012800		CepurGG1@5G014400.1		Pp3c16_7080				10	scaffold-AWOI-2014235-Diphyscium_foliosum	cluster_1537	ABK4
abk4g01787	BA07G04240	BA04G18830		Poh0116210			Hypnum@jg8267.t1	Hypnum@jg18722.t1	Entodon@jg24473.t1	Entodon@jg1145.t1			CepurR40.5G012800		CepurGG1@5G014400.1		Pp3c16_7080				10	scaffold-AWOI-2014235-Diphyscium_foliosum	cluster_1538	ABK4
abk4g01788	BA07G04240	BA04G18830		Poh0116210			Hypnum@jg8267.t1	Hypnum@jg18722.t1	Entodon@jg24473.t1	Entodon@jg1145.t1			CepurR40.5G012800		CepurGG1@5G014400.1		Pp3c16_7080				10	scaffold-AWOI-2014235-Diphyscium_foliosum	cluster_1539	ABK4
abk4g01789	BA07G04240	BA04G18830		Poh0116210			Hypnum@jg8267.t1	Hypnum@jg18722.t1	Entodon@jg24473.t1	Entodon@jg1145.t1			CepurR40.5G012800		CepurGG1@5G014400.1		Pp3c16_7080				10	scaffold-AWOI-2014235-Diphyscium_foliosum	cluster_1540	ABK4
abk4g01798	BA04G21870	BA07G08310	Poh0060380	Poh0116310		Poh0013860	Hypnum@jg18781.t1	Hypnum@jg7500.t1	Entodon@jg1198.t1	Entodon@jg25230.t1	Sc_g07689		CepurR40.5G075000		CepurGG1@5G090000.1		Pp3c16_7250				13	#N/A	cluster_1541	ABK4
abk4g01813	BA04G23840	BA07G08200	Poh0060440	Poh0115400	Poh0013080		Hypnum@jg18141.t1	Hypnum@jg7485.t1	Entodon@jg645.t1	Entodon@jg25216.t1	Sc_g07678		CepurR40.5G075500		CepurGG1@5G089600.1		Pp3c16_7480	Pp3c25_8630			14	scaffold-AWOI-2006629-Diphyscium_foliosum	cluster_1542	ABK4
abk4g01814	BA04G23840	BA07G08200	Poh0060440	Poh0115400	Poh0013080		Hypnum@jg18141.t1	Hypnum@jg7485.t1	Entodon@jg645.t1	Entodon@jg25216.t1	Sc_g07678		CepurR40.5G075500		CepurGG1@5G089600.1		Pp3c16_7480	Pp3c25_8630			14	scaffold-AWOI-2006627-Diphyscium_foliosum	cluster_1543	ABK4
abk4g01815	BA04G23840	BA07G08200	Poh0060440	Poh0115400	Poh0013080		Hypnum@jg18141.t1	Hypnum@jg7485.t1	Entodon@jg645.t1	Entodon@jg25216.t1	Sc_g07678		CepurR40.5G075600		CepurGG1@5G089400.1		Pp3c16_7490	Pp3c25_8630			14	scaffold-AWOI-2006627-Diphyscium_foliosum	cluster_1544	ABK4
abk4g01819	BA04G23840	BA07G08190	Poh0060430	Poh0115400	Poh0013080		Hypnum@jg18141.t1	Hypnum@jg7488.t1	Entodon@jg645.t1	Entodon@jg25217.t1	Sc_g07680		CepurR40.5G075800		CepurGG1@5G088600.1		Pp3c16_7540	Pp3c25_8610			14	scaffold-AWOI-2006629-Diphyscium_foliosum	cluster_1545	ABK4
abk4g01842	BA07G03830	BA04G09570	Poh0020200	Poh0000600	Poh0065010		Hypnum@jg8242.t1		Entodon@jg24500.t1		Sc_g07366		CepurR40.5G016000		CepurGG1@5G018100.1		Pp3c16_7830				11	scaffold-AWOI-2073426-Diphyscium_foliosum	cluster_1546	ABK4
abk4g01843	BA07G03820		Poh0020210	Poh0000590	Poh0065020		Hypnum@jg8242.t1		Entodon@jg24500.t1		Sc_g07367		CepurR40.5G015800		CepurGG1@5G017800.1		Pp3c16_7820	Pp3c25_5310			11	scaffold-AWOI-2010745-Diphyscium_foliosum	cluster_1547	ABK4
abk4g01846	BA07G03820		Poh0020210	Poh0000590	Poh0065020		Hypnum@jg8242.t1		Entodon@jg24500.t1		Sc_g07367		CepurR40.5G015800		CepurGG1@5G017800.1		Pp3c16_7820	Pp3c25_5310			11	scaffold-AWOI-2010745-Diphyscium_foliosum	cluster_1548	ABK4
abk4g01847	BA07G03820		Poh0020210	Poh0000590	Poh0065020		Hypnum@jg8242.t1		Entodon@jg24500.t1		Sc_g07367		CepurR40.5G015800		CepurGG1@5G017800.1		Pp3c16_7820	Pp3c25_5310			11	scaffold-AWOI-2010745-Diphyscium_foliosum	cluster_1549	ABK4
abk4g01848	BA07G03820		Poh0020210	Poh0000590	Poh0065020		Hypnum@jg8242.t1		Entodon@jg24500.t1		Sc_g07367		CepurR40.5G015800		CepurGG1@5G017800.1		Pp3c16_7820	Pp3c25_5310			11	scaffold-AWOI-2010745-Diphyscium_foliosum	cluster_1550	ABK4
abk4g01849	BA07G03830	BA04G09570	Poh0020200	Poh0000600	Poh0065010		Hypnum@jg8242.t1		Entodon@jg24500.t1		Sc_g07366		CepurR40.5G016000		CepurGG1@5G018100.1		Pp3c16_7830				11	scaffold-AWOI-2073426-Diphyscium_foliosum	cluster_1551	ABK4
abk4g01854	BA07G03830	BA04G09570	Poh0020200	Poh0000600	Poh0065010		Hypnum@jg8242.t1		Entodon@jg24500.t1		Sc_g07366		CepurR40.5G016000		CepurGG1@5G018100.1		Pp3c16_7830				11	scaffold-AWOI-2073426-Diphyscium_foliosum	cluster_1552	ABK4
[truncated: 1,212 more rows]
